# Supplementary material for: Transcriptome analysis of genes and metabolic pathways associated with nicotine degradation in Aspergillus oryzae 112822
Source: BMC Genomics. 2019 Jan 24;20:86. doi: 10.1186/s12864-019-5446-2 (PMC6346535; doi:10.1186/s12864-019-5446-2)
Supplement: Supplementary file 3 — Table S1. DEGs between the YD and Nic libraries. Table S2. COG classification of DEGs. Table S3. GO classification and enrichment analysis of DEGs. Table S4. KEGG pathway annotation of DEGs. Table S5. Candidate genes involved in the demethylation pathway of nicotine degradation in A. oryzae 112822. Table S6. DEGs associated with energy production in A. oryzae 112822 exposed to nicotine. Table S7. DEGs encoding enzymes involved in oxidative stress responses. Table S8. DEGs encoding enzymes involved in phase II detoxification. Table S9. DEGs encoding transporters involved in efflux of nicotine and its metabolites. Table S10. Information for the primers used in the qRT-PCR analysis. (XLSX 1155 kb) [file 12864_2019_5446_MOESM3_ESM.xlsx]

## Sheet: Table S1
Table S1 DEGs between the YD and Nic libraries
GeneID	Length	YD-Expression	Nic-Expression	log2FoldChange(Nic/YD)	Padj	Up/Down-Regulation	Pvalue	Cellular Component	Molecular Function	Biological Process	COG_class_annotation	Kegg Orthology	Nr Description
AO090102000637	969	0.435169	3038.89	12.7697	2.8446e-44	Up	5.41791e-45	GO:0031224//intrinsic component of membrane	NA	GO:0051234//establishment of localization	NA	K13354//solute carrier family 25 (peroxisomal adenine nucleotide transporter), member 17	gi|169776631|ref|XP_001822782.1|//peroxisomal membrane protein Pmp47 [Aspergillus oryzae RIB40]
AO090026000066	2988	0.409582	1672.61	11.9957	2.34026e-37	Up	4.9356e-38	NA	GO:0003824//catalytic activity	NA	Amino acid transport and metabolism ; Secondary metabolites biosynthesis, transport and catabolism ;	K01580//glutamate decarboxylase [EC:4.1.1.15];K01469//5-oxoprolinase (ATP-hydrolysing) [EC:3.5.2.9]	gi|169774195|ref|XP_001821565.1|//hydantoinase/oxoprolinase [Aspergillus oryzae RIB40]
AO090011000586	603	0.401466	1370.18	11.7368	3.33694e-35	Up	7.26183e-36	NA	NA	NA	NA	NA	gi|169783468|ref|XP_001826196.1|//hypothetical protein AOR_1_990054 [Aspergillus oryzae RIB40]
AO090012000307	1554	0.399975	1341.8	11.712	4.99328e-35	Up	1.09077e-35	NA	GO:0016709//oxidoreductase activity, acting on paired donors, with incorporation or reduction of molecular oxygen, NAD(P)H as one donor, and incorporation of one atom of oxygen;GO:0005506//iron ion binding	GO:0008152//metabolic process	Secondary metabolites biosynthesis, transport and catabolism ;	K07824//benzoate 4-monooxygenase [EC:1.14.13.12]	gi|169762890|ref|XP_001727345.1|//benzoate 4-monooxygenase [Aspergillus oryzae RIB40]
AO090012000852	1104	0.399868	1330.94	11.7006	6.26474e-35	Up	1.37198e-35	NA	NA	NA	NA	NA	gi|169763808|ref|XP_001727804.1|//hypothetical protein AOR_1_1492194 [Aspergillus oryzae RIB40]
AO090003001323	564	0.589394	1202.49	10.9945	6.70466e-42	Up	1.31958e-42	NA	NA	NA	Inorganic ion transport and metabolism ;	NA	gi|169771833|ref|XP_001820386.1|//Inorganic phosphate transport protein PHO88 [Aspergillus oryzae RIB40]
AO090701000220	1836	0.364463	572.203	10.6165	6.37389e-27	Up	1.58892e-27	NA	GO:0004180//carboxypeptidase activity	GO:0019538//protein metabolic process	Amino acid transport and metabolism ;	K01288//carboxypeptidase D [EC:3.4.16.6]	gi|169777249|ref|XP_001823090.1|//carboxypeptidase S1 [Aspergillus oryzae RIB40]
AO090103000027	2622	0.363635	555.219	10.5763	1.2239e-26	Up	3.07241e-27	GO:0043231//intracellular membrane-bounded organelle	GO:0046914//transition metal ion binding;GO:0001071//nucleic acid binding transcription factor activity;GO:0003676//nucleic acid binding	GO:0006351//transcription, DNA-templated	NA	K09244//transcriptional regulatory protein AMDR	gi|169784370|ref|XP_001826646.1|//C6 transcription factor (Ctf1B) [Aspergillus oryzae RIB40]
AO090103000477	561	0.355955	463.968	10.3481	3.75031e-25	Up	9.69081e-26	NA	GO:0016407//acetyltransferase activity	GO:0008152//metabolic process	Transcription ; General function prediction only ;	NA	gi|169785138|ref|XP_001827030.1|//GNAT family N-acetyltransferase [Aspergillus oryzae RIB40]
AO090701000268	930	0.352274	421.152	10.2234	2.38088e-24	Up	6.26397e-25	NA	NA	NA	NA	NA	gi|169777337|ref|XP_001823134.1|//hypothetical protein AOR_1_494114 [Aspergillus oryzae RIB40]
AO090138000099	891	1.19784	1295.99	10.0794	7.57461e-65	Up	1.1547e-65	NA	NA	NA	General function prediction only ;	K01069//hydroxyacylglutathione hydrolase [EC:3.1.2.6]	gi|169782291|ref|XP_001825608.1|//metallo-beta-lactamase superfamily protein [Aspergillus oryzae RIB40]
AO090012000615	4404	94.8665	101575	10.0644	0	Up	0	GO:0031224//intrinsic component of membrane	GO:0015405//P-P-bond-hydrolysis-driven transmembrane transporter activity;GO:0032559//adenyl ribonucleotide binding;GO:0032561//guanyl ribonucleotide binding;GO:0017111//nucleoside-triphosphatase activity	GO:0051234//establishment of localization;GO:0009207//purine ribonucleoside triphosphate catabolic process	Defense mechanisms ;	K08711//ATP-binding cassette, subfamily G (WHITE), member 2, PDR	gi|83770630|dbj|BAE60763.1|//unnamed protein product [Aspergillus oryzae RIB40]
AO090120000396	1788	0.346522	351.402	9.98596	7.55665e-23	Up	2.05768e-23	NA	GO:0032559//adenyl ribonucleotide binding;GO:0016301//kinase activity	GO:0019400//alditol metabolic process;GO:0006796//phosphate-containing compound metabolic process	Carbohydrate transport and metabolism ;	K00863//triose/dihydroxyacetone kinase / FAD-AMP lyase (cyclizing) [EC:2.7.1.28 2.7.1.29 4.6.1.15]	gi|169779293|ref|XP_001824111.1|//dihydroxyacetone kinase (DakA) [Aspergillus oryzae RIB40]
AO090005001197	1125	0.343466	332.091	9.91719	1.86591e-22	Up	5.12725e-23	NA	NA	NA	NA	K03846//alpha-1,2-mannosyltransferase [EC:2.4.1.259 2.4.1.261]	gi|83766008|dbj|BAE56151.1|//unnamed protein product [Aspergillus oryzae RIB40]
AO090166000059	915	1.61423	1458.07	9.819	9.18431e-81	Up	1.22085e-81	NA	NA	NA	NA	K00831//phosphoserine aminotransferase [EC:2.6.1.52]	gi|169776754|ref|XP_001822843.1|//hypothetical protein AOR_1_74124 [Aspergillus oryzae RIB40]
AO090038000625	678	0.338651	299.542	9.78874	1.02418e-21	Up	2.85955e-22	NA	NA	GO:0070071//proton-transporting two-sector ATPase complex assembly	Posttranslational modification, protein turnover, chaperones ;	K07556//ATP synthase mitochondrial F1 complex assembly factor 2	gi|83774261|dbj|BAE64386.1|//unnamed protein product [Aspergillus oryzae RIB40]
AO090005001535	1113	0.335121	274.415	9.67746	4.45432e-21	Up	1.26417e-21	NA	GO:0000166//nucleotide binding;GO:0003824//catalytic activity	NA	Energy production and conversion ;	K00354//NADPH2 dehydrogenase [EC:1.6.99.1]	gi|169767956|ref|XP_001818449.1|//NADH:flavin oxidoreductase/NADH oxidase family protein [Aspergillus oryzae RIB40]
AO090009000017	471	1.18508	969.083	9.67549	4.92687e-59	Up	7.88263e-60	NA	NA	NA	General function prediction only ;	NA	gi|83764395|dbj|BAE54539.1|//unnamed protein product [Aspergillus oryzae RIB40]
AO090003000148	1902	0.339105	276.187	9.6697	6.11592e-21	Up	1.74137e-21	GO:0031224//intrinsic component of membrane;GO:0031966//mitochondrial membrane	GO:0046872//metal ion binding;GO:0032561//guanyl ribonucleotide binding;GO:0003824//catalytic activity	GO:0034643//establishment of mitochondrion localization, microtubule-mediated;GO:0035556//intracellular signal transduction	General function prediction only ;	K07870//Ras homolog gene family, member T1	gi|169769809|ref|XP_001819374.1|//Rho GTPase 1 [Aspergillus oryzae RIB40]
AO090701000400	1578	0.335623	272.104	9.6631	5.61506e-21	Up	1.59731e-21	NA	GO:0016798//hydrolase activity, acting on glycosyl bonds	GO:0044238//primary metabolic process	Carbohydrate transport and metabolism ;	K01193//beta-fructofuranosidase [EC:3.2.1.26]	gi|169777559|ref|XP_001823245.1|//beta-fructofuranosidase [Aspergillus oryzae RIB40]
AO090102000613	1224	0.33231	254.837	9.58283	1.53398e-20	Up	4.41568e-21	NA	GO:0046914//transition metal ion binding;GO:0051287//NAD binding;GO:0016810//hydrolase activity, acting on carbon-nitrogen (but not peptide) bonds	GO:0016458//gene silencing;GO:0035601//protein deacylation	Transcription ;	K02365//separase [EC:3.4.22.49];K11412//NAD-dependent deacetylase sirtuin 2 [EC:3.5.1.-];K11121//NAD-dependent histone deacetylase SIR2 [EC:3.5.1.-]	gi|391874459|gb|EIT83341.1|//sirtuin 4 [Aspergillus oryzae 3.042]
AO090003000018	597	19.0228	14346.7	9.55877	0	Up	0	NA	NA	NA	Posttranslational modification, protein turnover, chaperones ;	K13993//HSP20 family protein	gi|169769581|ref|XP_001819260.1|//heat shock protein [Aspergillus oryzae RIB40]
AO090003000208	1197	12.225	9059.39	9.53343	0	Up	0	NA	GO:0016702//oxidoreductase activity, acting on single donors with incorporation of molecular oxygen, incorporation of two atoms of oxygen;GO:0043169//cation binding	GO:0006558//L-phenylalanine metabolic process;GO:0006570//tyrosine metabolic process	Amino acid transport and metabolism ; General function prediction only ;	K00457//4-hydroxyphenylpyruvate dioxygenase [EC:1.13.11.27]	gi|169769905|ref|XP_001819422.1|//4-hydroxyphenylpyruvate dioxygenase [Aspergillus oryzae RIB40]
AO090026000697	786	0.330661	242.544	9.51868	3.55216e-20	Up	1.02938e-20	NA	GO:0016787//hydrolase activity	GO:0044238//primary metabolic process	Carbohydrate transport and metabolism ;	K01452//chitin deacetylase [EC:3.5.1.41];K06018//endopolyphosphatase [EC:3.6.1.10]	gi|238496087|ref|XP_002379279.1|//polysaccharide deacetylase (NodB), putative [Aspergillus flavus NRRL3357]
AO090020000490	1416	0.328292	229.936	9.45204	8.16748e-20	Up	2.38942e-20	NA	NA	GO:0044238//primary metabolic process	General function prediction only ;	K01052//lysosomal acid lipase/cholesteryl ester hydrolase [EC:3.1.1.13]	gi|169780662|ref|XP_001824795.1|//triglyceride lipase-cholesterol esterase [Aspergillus oryzae RIB40]
AO090010000641	1689	2.45243	1702.71	9.4394	8.64557e-110	Up	9.40722e-111	GO:0044464//cell part	GO:0015291//secondary active transmembrane transporter activity	GO:0015698//inorganic anion transport	Inorganic ion transport and metabolism ;	K03306//inorganic phosphate transporter, PiT family	gi|169786285|ref|XP_001827603.1|//phosphate-repressible phosphate permease [Aspergillus oryzae RIB40]
AO090102000434	794	0.538772	358.677	9.37879	3.10854e-28	Up	7.58034e-29	NA	NA	NA	NA	NA	gi|83771347|dbj|BAE61479.1|//unnamed protein product [Aspergillus oryzae RIB40];gi|83774387|dbj|BAE64511.1|//unnamed protein product [Aspergillus oryzae RIB40]
AO090009000637	1833	0.325919	212.706	9.35013	3.01345e-19	Up	8.97405e-20	NA	NA	NA	Carbohydrate transport and metabolism ; Amino acid transport and metabolism ; Inorganic ion transport and metabolism ; General function prediction only ;	K15378//solute carrier family 45, member 1/2/4	gi|83764917|dbj|BAE55061.1|//unnamed protein product [Aspergillus oryzae RIB40]
AO090038000085	2590	232.028	150818	9.3443	0	Up	0	NA	NA	NA	NA	NA	gi|914762259|gb|KOC16074.1|//hypothetical protein AFLA70_376g001011 [Aspergillus flavus AF70];gi|169781202|ref|XP_001825064.1|//hypothetical protein AOR_1_136074 [Aspergillus oryzae RIB40]
AO090102000429	6242	3.51759	2267.73	9.33244	1.83621e-148	Up	1.62948e-149	NA	NA	NA	NA	K13411//dual oxidase [EC:1.6.3.1 1.11.1.-];K00521//ferric-chelate reductase [EC:1.16.1.7]	gi|83771346|dbj|BAE61478.1|//unnamed protein product [Aspergillus oryzae RIB40];gi|83771344|dbj|BAE61476.1|//unnamed protein product [Aspergillus oryzae RIB40]
AO090012000901	1737	0.956819	548.101	9.16198	1.44724e-43	Up	2.78577e-44	GO:0044464//cell part	GO:0015291//secondary active transmembrane transporter activity;GO:0008483//transaminase activity;GO:0048037//cofactor binding	GO:0019752//carboxylic acid metabolic process;GO:0015698//inorganic anion transport	Inorganic ion transport and metabolism ;	K14640//solute carrier family 20 (sodium-dependent phosphate transporter)	gi|169763886|ref|XP_001727843.1|//phosphate-repressible phosphate permease [Aspergillus oryzae RIB40]
AO090009000284	585	0.319669	182.992	9.16099	2.90477e-18	Up	8.89373e-19	GO:0043231//intracellular membrane-bounded organelle;GO:0031224//intrinsic component of membrane;GO:0012505//endomembrane system	NA	NA	NA	NA	gi|169764587|ref|XP_001816765.1|//golgi apparatus membrane protein tvp23 [Aspergillus oryzae RIB40]
AO090120000260	1848	0.320731	175.205	9.09347	7.31219e-18	Up	2.26306e-18	NA	GO:0003824//catalytic activity	NA	NA	NA	gi|169779061|ref|XP_001823995.1|//glycosyl hydrolase [Aspergillus oryzae RIB40]
AO090166000085	2010	14.334	7647.39	9.05938	0	Up	0	NA	NA	NA	NA	NA	gi|238502105|ref|XP_002382286.1|//conserved hypothetical protein [Aspergillus flavus NRRL3357];gi|83771603|dbj|BAE61734.1|//unnamed protein product [Aspergillus oryzae RIB40]
AO090011000286	1314	0.7412	391.587	9.04525	5.04341e-34	Up	1.12169e-34	NA	GO:0016769//transferase activity, transferring nitrogenous groups;GO:0016846//carbon-sulfur lyase activity;GO:0048037//cofactor binding	GO:0008652//cellular amino acid biosynthetic process	Amino acid transport and metabolism ;	K10838//xeroderma pigmentosum group C-complementing protein;K14264//kynurenine aminotransferase [EC:2.6.1.7]	gi|169782954|ref|XP_001825939.1|//aspartate aminotransferase [Aspergillus oryzae RIB40]
AO090701000588	555	0.3194	167.828	9.0374	1.4302e-17	Up	4.46059e-18	NA	GO:0016879//ligase activity, forming carbon-nitrogen bonds;GO:0032559//adenyl ribonucleotide binding	GO:0006464//cellular protein modification process	Posttranslational modification, protein turnover, chaperones ;	K10579//ubiquitin-conjugating enzyme E2 M	gi|169777895|ref|XP_001823413.1|//NEDD8-conjugating enzyme UBC12 [Aspergillus oryzae RIB40]
AO090701000232	1881	0.315249	156.409	8.95461	3.45534e-17	Up	1.09103e-17	NA	GO:0005488//binding	NA	Posttranslational modification, protein turnover, chaperones ;	K18732//SAP domain-containing ribonucleoprotein;K11450//lysine-specific histone demethylase 1A [EC:1.-.-.-]	gi|169777273|ref|XP_001823102.1|//SAP domain protein [Aspergillus oryzae RIB40]
AO090003000029	408	0.315078	154.418	8.93692	4.28249e-17	Up	1.35614e-17	NA	NA	NA	NA	K15710//E3 ubiquitin-protein ligase SHPRH [EC:3.6.4.- 2.3.2.27]	gi|83767129|dbj|BAE57268.1|//unnamed protein product [Aspergillus oryzae RIB40]
AO090102000224	747	0.315537	147.071	8.86449	1.08621e-16	Up	3.48472e-17	NA	NA	NA	NA	NA	gi|169775963|ref|XP_001822448.1|//hypothetical protein AOR_1_402134 [Aspergillus oryzae RIB40]
AO090023000011	1302	15.6025	6838.14	8.77568	0	Up	0	NA	GO:0003824//catalytic activity	GO:0008152//metabolic process	Amino acid transport and metabolism ;	K00274//monoamine oxidase [EC:1.4.3.4];K00280//lysyl oxidase-like protein 2/3/4 [EC:1.4.3.-]	gi|169772269|ref|XP_001820603.1|//amine oxidase [Aspergillus oryzae RIB40]
AO090012000493	942	0.308798	133.757	8.75873	3.05646e-16	Up	9.8984e-17	GO:0031224//intrinsic component of membrane	NA	NA	NA	K13348//protein Mpv17;K00254//dihydroorotate dehydrogenase [EC:1.3.5.2];K17815//exonuclease V [EC:3.1.-.-]	gi|169763204|ref|XP_001727502.1|//integral membrane protein, Mpv17/PMP22 family [Aspergillus oryzae RIB40]
AO090003001491	4103	18.1484	7679.01	8.72493	0	Up	0	GO:0031224//intrinsic component of membrane;GO:0016021//integral component of membrane	GO:0015405//P-P-bond-hydrolysis-driven transmembrane transporter activity;GO:0005524//ATP binding;GO:0032559//adenyl ribonucleotide binding;GO:0017111//nucleoside-triphosphatase activity;GO:0042626//ATPase activity, coupled to transmembrane movement of substances	GO:0006810//transport;GO:0055085//transmembrane transport;GO:0009207//purine ribonucleoside triphosphate catabolic process	Defense mechanisms ;	K05658//ATP-binding cassette, subfamily B (MDR/TAP), member 1 [EC:3.6.3.44]	gi|391872528|gb|EIT81644.1|//multidrug/pheromone exporter, ABC superfamily [Aspergillus oryzae 3.042];gi|317144980|ref|XP_001820535.2|//ATP-binding cassette multidrug transport protein ATRC [Aspergillus oryzae RIB40]
AO090113000084	1050	0.306185	126.244	8.68759	6.47321e-16	Up	2.11781e-16	NA	GO:0016641//oxidoreductase activity, acting on the CH-NH2 group of donors, oxygen as acceptor	GO:0008152//metabolic process	Amino acid transport and metabolism ;	K00273//D-amino-acid oxidase [EC:1.4.3.3];K14566//U3 small nucleolar RNA-associated protein 24	gi|238500297|ref|XP_002381383.1|//FAD dependent oxidoreductase superfamily [Aspergillus flavus NRRL3357]
AO090005000770	1404	0.306697	124.941	8.67022	8.17589e-16	Up	2.68089e-16	NA	GO:0005488//binding	NA	NA	NA	gi|83765650|dbj|BAE55793.1|//unnamed protein product [Aspergillus oryzae RIB40]
AO090003000209	1341	6.89014	2797.93	8.66561	1.09389e-246	Up	6.7267e-248	NA	NA	NA	NA	NA	gi|83767282|dbj|BAE57421.1|//unnamed protein product [Aspergillus oryzae RIB40]
AO090009000219	1617	159.392	63614.8	8.64064	0	Up	0	GO:0042579//microbody	GO:0016833//oxo-acid-lyase activity	GO:0044262//cellular carbohydrate metabolic process;GO:0043436//oxoacid metabolic process;GO:0009060//aerobic respiration	Energy production and conversion ;	K01637//isocitrate lyase [EC:4.1.3.1]	gi|169764481|ref|XP_001816712.1|//isocitrate lyase [Aspergillus oryzae RIB40]
AO090138000093	753	1.15727	454.958	8.61887	9.83443e-45	Up	1.86042e-45	GO:0031224//intrinsic component of membrane	NA	NA	NA	K00606//3-methyl-2-oxobutanoate hydroxymethyltransferase [EC:2.1.2.11]	gi|391863602|gb|EIT72907.1|//amino acid transporter [Aspergillus oryzae 3.042]
AO090120000338	633	0.303599	113.175	8.54217	3.27017e-15	Up	1.08945e-15	NA	NA	NA	NA	NA	gi|83772800|dbj|BAE62928.1|//unnamed protein product [Aspergillus oryzae RIB40]
AO090012000614	1897	33.222	12172.9	8.51732	0	Up	0	NA	NA	NA	NA	K09241//transcriptional regulatory protein GAL4	gi|83770629|dbj|BAE60762.1|//unnamed protein product [Aspergillus oryzae RIB40]
AO090010000126	1641	35.1339	12765.1	8.50512	0	Up	0	GO:0031224//intrinsic component of membrane	GO:0022857//transmembrane transporter activity	GO:0006810//transport	Carbohydrate transport and metabolism ; Amino acid transport and metabolism ; Inorganic ion transport and metabolism ; General function prediction only ;	K08139//MFS transporter, SP family, sugar:H+ symporter	gi|169785413|ref|XP_001827167.1|//MFS monosaccharide transporter [Aspergillus oryzae RIB40]
AO090020000226	1770	0.301499	106.793	8.46844	7.00362e-15	Up	2.3571e-15	NA	NA	NA	NA	K20478//golgin subfamily B member 1	gi|83773317|dbj|BAE63444.1|//unnamed protein product [Aspergillus oryzae RIB40];gi|238505689|ref|XP_002384056.1|//hypothetical protein AFLA_101840 [Aspergillus flavus NRRL3357]
AO090009000216	2510	12.6189	4264.32	8.40059	0	Up	0	GO:0031224//intrinsic component of membrane;GO:0005887//integral component of plasma membrane	GO:0046873//metal ion transmembrane transporter activity;GO:0015079//potassium ion transmembrane transporter activity	GO:0030007//cellular potassium ion homeostasis;GO:0034220//ion transmembrane transport;GO:0071805//potassium ion transmembrane transport;GO:0030001//metal ion transport	Inorganic ion transport and metabolism ;	NA	gi|914754493|gb|KOC08658.1|//putative potassium uptake transporter [Aspergillus flavus AF70];gi|391870082|gb|EIT79270.1|//Trk-type K+ transport membrane protein [Aspergillus oryzae 3.042]
AO090020000265	1077	0.935662	306.424	8.35533	7.36387e-35	Up	1.61472e-35	NA	GO:0016620//oxidoreductase activity, acting on the aldehyde or oxo group of donors, NAD or NADP as acceptor;GO:0000166//nucleotide binding	GO:0019318//hexose metabolic process	Carbohydrate transport and metabolism ;	K00134//glyceraldehyde 3-phosphate dehydrogenase [EC:1.2.1.12]	gi|169780294|ref|XP_001824611.1|//glyceraldehyde-3-phosphate dehydrogenase [Aspergillus oryzae RIB40]
AO090023000583	918	0.299251	97.7762	8.35198	2.4142e-14	Up	8.22511e-15	NA	NA	NA	Transcription ;	NA	gi|169773297|ref|XP_001821117.1|//hypothetical protein AOR_1_1010144 [Aspergillus oryzae RIB40]
AO090020000659	675	3.9065	1239.04	8.30913	4.33247e-130	Up	4.21162e-131	NA	GO:0016702//oxidoreductase activity, acting on single donors with incorporation of molecular oxygen, incorporation of two atoms of oxygen;GO:0046914//transition metal ion binding	GO:0006534//cysteine metabolic process	General function prediction only ;	K00456//cysteine dioxygenase [EC:1.13.11.20]	gi|169780952|ref|XP_001824940.1|//cysteine dioxygenase [Aspergillus oryzae RIB40]
AO090102000580	882	0.301077	95.4087	8.30785	4.18631e-14	Up	1.4386e-14	NA	GO:0019212//phosphatase inhibitor activity	GO:0007165//signal transduction;GO:0010921//regulation of phosphatase activity	NA	K16833//protein phosphatase inhibitor 2	gi|169776529|ref|XP_001822731.1|//hypothetical protein AOR_1_962134 [Aspergillus oryzae RIB40]
AO090012000578	720	0.296299	93.7422	8.3055	3.63018e-14	Up	1.24481e-14	NA	NA	NA	NA	NA	gi|169763342|ref|XP_001727571.1|//hypothetical protein AOR_1_1006194 [Aspergillus oryzae RIB40]
AO090003000130	1590	0.295709	92.5461	8.28985	4.24002e-14	Up	1.45784e-14	NA	NA	NA	NA	K01426//amidase [EC:3.5.1.4]	gi|83767218|dbj|BAE57357.1|//unnamed protein product [Aspergillus oryzae RIB40]
AO090001000134	591	1.14748	350.79	8.256	2.21649e-40	Up	4.46441e-41	NA	NA	NA	NA	NA	gi|238497736|ref|XP_002380103.1|//conserved hypothetical protein [Aspergillus flavus NRRL3357]
AO090011000745	924	1.35684	408.019	8.23224	4.48267e-47	Up	8.18707e-48	NA	NA	GO:0009251//glucan catabolic process	Secondary metabolites biosynthesis, transport and catabolism ;	K05972//acetylxylan esterase [EC:3.1.1.72]	gi|169783734|ref|XP_001826329.1|//acetylxylan esterase A [Aspergillus oryzae RIB40]
AO090120000069	1098	0.296139	88.3296	8.22048	9.12209e-14	Up	3.17254e-14	NA	GO:0016702//oxidoreductase activity, acting on single donors with incorporation of molecular oxygen, incorporation of two atoms of oxygen	NA	Function unknown ;	NA	gi|169778739|ref|XP_001823834.1|//quercetin 2,3-dioxygenase [Aspergillus oryzae RIB40]
AO090138000098	1800	1.78204	530.207	8.21688	4.78866e-60	Up	7.56452e-61	GO:0031224//intrinsic component of membrane;GO:0016021//integral component of membrane	NA	GO:0006810//transport;GO:0055085//transmembrane transport	Inorganic ion transport and metabolism ;	K14640//solute carrier family 20 (sodium-dependent phosphate transporter);K15449//tRNA wybutosine-synthesizing protein 1 [EC:4.1.3.44]	gi|83774350|dbj|BAE64474.1|//unnamed protein product [Aspergillus oryzae RIB40];gi|238500744|ref|XP_002381606.1|//MFS transporter, putative [Aspergillus flavus NRRL3357]
AO090138000060	570	0.294122	86.9855	8.20822	9.68407e-14	Up	3.37244e-14	NA	NA	NA	NA	NA	gi|169782225|ref|XP_001825575.1|//hypothetical protein AOR_1_100064 [Aspergillus oryzae RIB40]
AO090102000510	1002	2.84128	820.092	8.1731	3.27617e-92	Up	3.97193e-93	NA	NA	NA	General function prediction only ;	K13124//mitogen-activated protein kinase organizer 1	gi|83771406|dbj|BAE61538.1|//unnamed protein product [Aspergillus oryzae RIB40]
AO090138000139	2429	6.45064	1696.64	8.03902	1.85291e-195	Up	1.38162e-196	NA	NA	NA	NA	NA	gi|317156263|ref|XP_003190699.1|//hypothetical protein AOR_1_232064 [Aspergillus oryzae RIB40];gi|83774387|dbj|BAE64511.1|//unnamed protein product [Aspergillus oryzae RIB40];gi|83774386|dbj|BAE64510.1|//unnamed protein product [Aspergillus oryzae RIB40]
AO090138000142	6491	23.651	6167.64	8.02668	0	Up	0	NA	NA	NA	NA	K00521//ferric-chelate reductase [EC:1.16.1.7];K16815//calcium-independent phospholipase A2-gamma	gi|83774390|dbj|BAE64514.1|//unnamed protein product [Aspergillus oryzae RIB40];gi|317156347|ref|XP_003190718.1|//patatin-like phospholipase [Aspergillus oryzae RIB40]
AO090003001507	1213	32.7785	7853.7	7.90448	0	Up	0	GO:0005576//extracellular region	GO:0050525//cutinase activity	GO:0008152//metabolic process	NA	K08095//cutinase [EC:3.1.1.74]	gi|169772161|ref|XP_001820550.1|//cutinase precursor [Aspergillus oryzae RIB40]
AO090009000129	2164	34.6883	8230.56	7.8904	0	Up	0	NA	NA	NA	Carbohydrate transport and metabolism ;	K19849//signaling mucin MSB2;K01183//chitinase [EC:3.2.1.14]	gi|238504440|ref|XP_002383451.1|//conserved hypothetical protein [Aspergillus flavus NRRL3357];gi|83764491|dbj|BAE54635.1|//unnamed protein product [Aspergillus oryzae RIB40]
AO090011000913	1806	0.299223	67.8415	7.8248	5.39465e-12	Up	1.99968e-12	NA	GO:0003824//catalytic activity	GO:0044238//primary metabolic process	NA	K16815//calcium-independent phospholipase A2-gamma;K00600//glycine hydroxymethyltransferase [EC:2.1.2.1]	gi|169784026|ref|XP_001826475.1|//patatin-like serine hydrolase [Aspergillus oryzae RIB40]
AO090003000310	1062	155.1	32151.8	7.69556	0	Up	0	GO:0031224//intrinsic component of membrane;GO:0031967//organelle envelope	GO:0043169//cation binding;GO:0003824//catalytic activity	GO:0006091//generation of precursor metabolites and energy;GO:0032501//multicellular organismal process	NA	NA	gi|169770083|ref|XP_001819511.1|//alternative oxidase [Aspergillus oryzae RIB40]
AO090011000119	822	11.7505	2401.97	7.67535	0	Up	0	NA	NA	NA	Carbohydrate transport and metabolism ;	NA	gi|169782686|ref|XP_001825805.1|//cell wall serine-threonine-rich galactomannoprotein Mp1 [Aspergillus oryzae RIB40]
AO090020000378	1741	1.97864	388.267	7.61639	1.33412e-55	Up	2.22046e-56	GO:0016021//integral component of membrane	GO:0003824//catalytic activity;GO:0015171//amino acid transmembrane transporter activity;GO:0016491//oxidoreductase activity	GO:0003333//amino acid transmembrane transport;GO:0055114//oxidation-reduction process	Amino acid transport and metabolism ;	NA	gi|83773446|dbj|BAE63573.1|//unnamed protein product [Aspergillus oryzae RIB40];gi|317151507|ref|XP_003190527.1|//hypothetical protein AOR_1_670084 [Aspergillus oryzae RIB40]
AO090023000804	684	4.74094	909.266	7.58339	2.15045e-126	Up	2.13402e-127	GO:0012510//trans-Golgi network transport vesicle membrane;GO:0005905//clathrin-coated pit	NA	GO:0015031//protein transport	NA	K04646//clathrin heavy chain	gi|83769170|dbj|BAE59307.1|//unnamed protein product [Aspergillus oryzae RIB40]
AO090009000475	900	0.277288	51.2549	7.53016	4.81113e-11	Up	1.84509e-11	NA	NA	GO:0012501//programmed cell death	NA	NA	gi|83764785|dbj|BAE54929.1|//unnamed protein product [Aspergillus oryzae RIB40]
AO090038000090	1689	59.3174	10939.4	7.52687	0	Up	0	GO:0031224//intrinsic component of membrane	GO:0022857//transmembrane transporter activity	GO:0006810//transport	Carbohydrate transport and metabolism ; Amino acid transport and metabolism ; Inorganic ion transport and metabolism ; General function prediction only ;	K08139//MFS transporter, SP family, sugar:H+ symporter	gi|169781210|ref|XP_001825068.1|//MFS quinate transporter [Aspergillus oryzae RIB40]
AO090010000628	939	1.12879	206.863	7.51775	2.68214e-32	Up	6.1529e-33	NA	NA	NA	Nucleotide transport and metabolism ;	K01951//GMP synthase (glutamine-hydrolysing) [EC:6.3.5.2]	gi|169786261|ref|XP_001827591.1|//hypothetical protein AOR_1_1050024 [Aspergillus oryzae RIB40]
AO090012000699	2063	6.22249	1127.39	7.50128	9.33562e-160	Up	7.85488e-161	GO:0016021//integral component of membrane	NA	GO:0006810//transport;GO:0055085//transmembrane transport	Carbohydrate transport and metabolism ; Amino acid transport and metabolism ; Inorganic ion transport and metabolism ; General function prediction only ;	K08157//MFS transporter, DHA1 family, multidrug resistance protein	gi|973788034|gb|KUM61531.1|//hypothetical protein ACN42_g5577 [Penicillium freii];gi|83770699|dbj|BAE60832.1|//unnamed protein product [Aspergillus oryzae RIB40]
AO090010000743	2168	7.71214	1374.26	7.47731	1.0855e-195	Up	8.08402e-197	GO:0031224//intrinsic component of membrane;GO:0016021//integral component of membrane	GO:0005215//transporter activity	GO:0006857//oligopeptide transport;GO:0015833//peptide transport	Amino acid transport and metabolism ;	K03305//proton-dependent oligopeptide transporter, POT family	gi|317159305|ref|XP_001827693.2|//oligopeptide transporter [Aspergillus oryzae RIB40];gi|391866250|gb|EIT75522.1|//H+/oligopeptide symporter [Aspergillus oryzae 3.042]
AO090102000067	1158	0.490483	85.1555	7.43975	8.48169e-16	Up	2.78351e-16	NA	GO:0016831//carboxy-lyase activity	NA	General function prediction only ;	K03392//aminocarboxymuconate-semialdehyde decarboxylase [EC:4.1.1.45]	gi|169775689|ref|XP_001822311.1|//2-amino-3-carboxymuconate-6-semialdehyde decarboxylase [Aspergillus oryzae RIB40]
AO090701000247	912	0.273655	46.7001	7.41492	1.22581e-10	Up	4.77549e-11	NA	NA	NA	NA	K19841//protein STE50;K06113//arabinan endo-1,5-alpha-L-arabinosidase [EC:3.2.1.99]	gi|169777301|ref|XP_001823116.1|//hypothetical protein AOR_1_458114 [Aspergillus oryzae RIB40]
AO090010000322	1025	1.54828	262.051	7.40304	1.12662e-41	Up	2.22462e-42	NA	GO:0016787//hydrolase activity;GO:0016810//hydrolase activity, acting on carbon-nitrogen (but not peptide) bonds	GO:0006807//nitrogen compound metabolic process;GO:0008152//metabolic process	General function prediction only ;	K13566//omega-amidase [EC:3.5.1.3];K05747//Wiskott-Aldrich syndrome protein;K01431//beta-ureidopropionase [EC:3.5.1.6];K10838//xeroderma pigmentosum group C-complementing protein;K11422//histone-lysine N-methyltransferase SETD1 [EC:2.1.1.43]	gi|83776085|dbj|BAE66204.1|//unnamed protein product [Aspergillus oryzae RIB40];gi|317158829|ref|XP_001827337.2|//hydrolase, carbon-nitrogen family protein [Aspergillus oryzae RIB40]
AO090020000677	3788	45.9463	7186.96	7.28929	0	Up	0	NA	GO:0019901//protein kinase binding	GO:0000079//regulation of cyclin-dependent protein serine/threonine kinase activity	NA	K06654//phosphate system cyclin PHO80;K06657//G1/S-specific cyclin PLC2;K14213//Xaa-Pro dipeptidase [EC:3.4.13.9]	gi|83773694|dbj|BAE63821.1|//unnamed protein product [Aspergillus oryzae RIB40]
AO090038000471	2892	6.64163	978.99	7.20361	7.84559e-154	Up	6.73119e-155	NA	GO:0005488//binding;GO:0016798//hydrolase activity, acting on glycosyl bonds	GO:0044238//primary metabolic process	Carbohydrate transport and metabolism ;	K01187//alpha-glucosidase [EC:3.2.1.20]	gi|83774132|dbj|BAE64257.1|//unnamed protein product [Aspergillus oryzae RIB40]
AO090701000317	1050	0.268903	37.8575	7.13735	1.15683e-09	Up	4.70273e-10	GO:0016021//integral component of membrane	NA	NA	NA	K10901//bloom syndrome protein [EC:3.6.4.12]	gi|83771916|dbj|BAE62046.1|//unnamed protein product [Aspergillus oryzae RIB40];gi|317149156|ref|XP_001823179.2|//hypothetical protein AOR_1_582114 [Aspergillus oryzae RIB40]
AO090103000119	1554	6.00379	829.912	7.11094	3.14092e-136	Up	2.95211e-137	NA	NA	GO:0006629//lipid metabolic process	Cell wall/membrane/envelope biogenesis ;	K20238//sphingolipid C9-methyltransferase [EC:2.1.1.317]	gi|169784524|ref|XP_001826723.1|//cyclopropane-fatty-acyl-phospholipid synthase [Aspergillus oryzae RIB40]
AO090012000375	1104	0.693012	94.6715	7.09391	1.0161e-18	Up	3.06336e-19	NA	GO:0016616//oxidoreductase activity, acting on the CH-OH group of donors, NAD or NADP as acceptor;GO:0046914//transition metal ion binding	GO:0008152//metabolic process	General function prediction only ;	K13953//alcohol dehydrogenase, propanol-preferring [EC:1.1.1.1]	gi|169763006|ref|XP_001727403.1|//alcohol dehydrogenase 2 [Aspergillus oryzae RIB40]
AO090701000249	762	17.685	2409.34	7.08996	0	Up	0	NA	NA	NA	NA	K00860//adenylylsulfate kinase [EC:2.7.1.25]	gi|83771855|dbj|BAE61985.1|//unnamed protein product [Aspergillus oryzae RIB40]
AO090003000174	1671	262.536	35581.4	7.08246	0	Up	0	GO:0044424//intracellular part	GO:0032559//adenyl ribonucleotide binding;GO:0004611//phosphoenolpyruvate carboxykinase activity;GO:0016772//transferase activity, transferring phosphorus-containing groups	GO:0006006//glucose metabolic process;GO:0006796//phosphate-containing compound metabolic process	Energy production and conversion ;	K01610//phosphoenolpyruvate carboxykinase (ATP) [EC:4.1.1.49]	gi|83767254|dbj|BAE57393.1|//unnamed protein product [Aspergillus oryzae RIB40]
AO090102000578	1338	0.274672	36.7039	7.06208	2.4071e-09	Up	9.88057e-10	GO:0043231//intracellular membrane-bounded organelle	GO:0008135//translation factor activity, RNA binding	GO:0006355//regulation of transcription, DNA-templated;GO:0006412//translation	Transcription ;	K03131//transcription initiation factor TFIID subunit 6	gi|169776525|ref|XP_001822729.1|//transcription initiation factor TFIID complex subunit [Aspergillus oryzae RIB40]
AO090023000117	966	0.478937	63.7778	7.05707	6.23983e-14	Up	2.15864e-14	NA	NA	NA	NA	NA	gi|83768558|dbj|BAE58695.1|//unnamed protein product [Aspergillus oryzae RIB40]
AO090102000418	2084	6.21423	820.205	7.04427	2.16076e-137	Up	2.01297e-138	NA	NA	NA	NA	K01673//carbonic anhydrase [EC:4.2.1.1]	gi|83771334|dbj|BAE61466.1|//unnamed protein product [Aspergillus oryzae RIB40]
AO090012000566	2325	0.267689	34.2011	6.99734	3.47859e-09	Up	1.43588e-09	NA	NA	NA	NA	K14862//nucleolar pre-ribosomal-associated protein 2	gi|83770592|dbj|BAE60725.1|//unnamed protein product [Aspergillus oryzae RIB40]
AO090103000158	2238	6.00104	715.716	6.89803	2.62066e-124	Up	2.62959e-125	GO:0043231//intracellular membrane-bounded organelle;GO:0005634//nucleus	GO:0000981//RNA polymerase II transcription factor activity, sequence-specific DNA binding;GO:0046914//transition metal ion binding;GO:0008270//zinc ion binding;GO:0001071//nucleic acid binding transcription factor activity	GO:0006357//regulation of transcription from RNA polymerase II promoter;GO:0006351//transcription, DNA-templated	NA	K09246//arginine metabolism regulation protein II	gi|238508232|ref|XP_002385315.1|//conserved hypothetical protein [Aspergillus flavus NRRL3357];gi|83775503|dbj|BAE65623.1|//unnamed protein product [Aspergillus oryzae RIB40]
AO090010000127	1107	0.262057	30.215	6.84924	9.68408e-09	Up	4.06601e-09	GO:0044464//cell part	GO:0005488//binding;GO:0004518//nuclease activity	NA	Replication, recombination and repair ;	K14570//RNA exonuclease 1 [EC:3.1.-.-]	gi|83775916|dbj|BAE66035.1|//unnamed protein product [Aspergillus oryzae RIB40]
AO090138000118	1734	0.480346	55.1831	6.84401	8.28743e-13	Up	2.98219e-13	NA	NA	GO:0006810//transport	Carbohydrate transport and metabolism ; Amino acid transport and metabolism ; Inorganic ion transport and metabolism ; General function prediction only ;	K08158//MFS transporter, DHA1 family, multidrug resistance protein	gi|83774369|dbj|BAE64493.1|//unnamed protein product [Aspergillus oryzae RIB40]
AO090009000015	1851	100.1	10995	6.77927	0	Up	0	GO:0031224//intrinsic component of membrane;GO:0016021//integral component of membrane	NA	NA	NA	K00606//3-methyl-2-oxobutanoate hydroxymethyltransferase [EC:2.1.2.11];K15015//solute carrier family 32 (vesicular inhibitory amino acid transporter)	gi|238504686|ref|XP_002383574.1|//neutral amino acid permease [Aspergillus flavus NRRL3357];gi|952552205|dbj|GAQ07518.1|//N amino acid transport system protein [Aspergillus lentulus]
AO090023000518	1092	73.7509	8018.97	6.76461	0	Up	0	NA	GO:0016616//oxidoreductase activity, acting on the CH-OH group of donors, NAD or NADP as acceptor;GO:0048037//cofactor binding	GO:0006007//glucose catabolic process;GO:0009081//branched-chain amino acid metabolic process	Lipid transport and metabolism ;	K00020//3-hydroxyisobutyrate dehydrogenase [EC:1.1.1.31]	gi|169773179|ref|XP_001821058.1|//3-hydroxyisobutyrate dehydrogenase [Aspergillus oryzae RIB40]
AO090026000084	678	82.4739	8963.02	6.7639	0	Up	0	GO:0043231//intracellular membrane-bounded organelle;GO:0031224//intrinsic component of membrane	GO:0016863//intramolecular oxidoreductase activity, transposing C=C bonds	GO:0006066//alcohol metabolic process	NA	K01824//cholestenol Delta-isomerase [EC:5.3.3.5]	gi|391872921|gb|EIT81998.1|//C-8,7 sterol isomerase [Aspergillus oryzae 3.042]
AO090005001477	447	0.27073	28.847	6.73542	2.60612e-08	Up	1.11461e-08	NA	GO:0034062//5'-3' RNA polymerase activity;GO:0005488//binding	GO:0010467//gene expression	Transcription ;	K03012//DNA-directed RNA polymerase II subunit RPB4	gi|992083478|ref|XP_015405276.1|//tRNA (guanine) methyltransferase Trm5 [Aspergillus nomius NRRL 13137]
AO090011000268	1848	0.259473	27.6233	6.73416	2.16952e-08	Up	9.24885e-09	NA	NA	GO:0006810//transport	Carbohydrate transport and metabolism ; Amino acid transport and metabolism ; Inorganic ion transport and metabolism ; General function prediction only ;	K08197//MFS transporter, SIT family, siderophore-iron:H+ symporter	gi|169782930|ref|XP_001825927.1|//siderophore iron transporter mirA [Aspergillus oryzae RIB40]
AO090701000423	2371	58.6649	6053.57	6.68914	0	Up	0	GO:0031224//intrinsic component of membrane;GO:0016021//integral component of membrane	GO:0005275//amine transmembrane transporter activity;GO:0015171//amino acid transmembrane transporter activity	GO:0006865//amino acid transport;GO:0003333//amino acid transmembrane transport	Amino acid transport and metabolism ;	K19564//choline transport protein	gi|83772004|dbj|BAE62134.1|//unnamed protein product [Aspergillus oryzae RIB40];gi|992075060|ref|XP_015401071.1|//GABA permease [Aspergillus nomius NRRL 13137]
AO090026000251	3468	0.282656	28.698	6.66576	5.17518e-08	Up	2.241e-08	NA	NA	GO:0055086//nucleobase-containing small molecule metabolic process	General function prediction only ;	K02155//V-type H+-transporting ATPase 16kDa proteolipid subunit;K16726//ankyrin repeat domain-containing protein 17	gi|83769597|dbj|BAE59732.1|//unnamed protein product [Aspergillus oryzae RIB40]
BGI_novel_G000078	991	0.258229	25.5046	6.62596	4.63248e-08	Up	2.00344e-08	NA	NA	NA	NA	NA	gi|317136567|ref|XP_003189956.1|//hypothetical protein AOR_1_122194 [Aspergillus oryzae RIB40]
AO090701000478	933	15.7622	1537.82	6.60827	4.08018e-283	Up	2.24235e-284	GO:0005789//endoplasmic reticulum membrane	GO:0016787//hydrolase activity	GO:0046488//phosphatidylinositol metabolic process;GO:0015031//protein transport	NA	NA	gi|83772056|dbj|BAE62186.1|//unnamed protein product [Aspergillus oryzae RIB40]
AO090009000544	1754	4.51164	440.068	6.60793	8.33029e-85	Up	1.06976e-85	GO:0016021//integral component of membrane	NA	NA	NA	K02920//large subunit ribosomal protein L36e;K00108//choline dehydrogenase [EC:1.1.99.1];K06123//1-acylglycerone phosphate reductase [EC:1.1.1.101]	gi|83764839|dbj|BAE54983.1|//unnamed protein product [Aspergillus oryzae RIB40];gi|317138539|ref|XP_001816985.2|//hypothetical protein AOR_1_896184 [Aspergillus oryzae RIB40]
AO090138000155	1370	0.683441	64.8793	6.5688	1.84842e-15	Up	6.11375e-16	NA	NA	NA	NA	K01673//carbonic anhydrase [EC:4.2.1.1]	gi|83774402|dbj|BAE64526.1|//unnamed protein product [Aspergillus oryzae RIB40]
AO090701000328	3912	0.256235	23.9849	6.54851	7.69671e-08	Up	3.35794e-08	GO:0031224//intrinsic component of membrane	GO:0015405//P-P-bond-hydrolysis-driven transmembrane transporter activity;GO:0032559//adenyl ribonucleotide binding;GO:0017111//nucleoside-triphosphatase activity	GO:0006810//transport;GO:0009207//purine ribonucleoside triphosphate catabolic process	Defense mechanisms ;	K05658//ATP-binding cassette, subfamily B (MDR/TAP), member 1 [EC:3.6.3.44]	gi|83771925|dbj|BAE62055.1|//unnamed protein product [Aspergillus oryzae RIB40]
AO090701000250	1362	1.10727	99.2898	6.48657	2.71238e-22	Up	7.4732e-23	NA	NA	NA	Amino acid transport and metabolism ;	NA	gi|169777307|ref|XP_001823119.1|//hypothetical protein AOR_1_464114 [Aspergillus oryzae RIB40]
AO090003001247	1407	52.5083	4670.31	6.47483	0	Up	0	GO:0044424//intracellular part	GO:0016823//hydrolase activity, acting on acid carbon-carbon bonds, in ketonic substances;GO:0048037//cofactor binding	GO:0019359//nicotinamide nucleotide biosynthetic process;GO:0006568//tryptophan metabolic process	Amino acid transport and metabolism ;	K01556//kynureninase [EC:3.7.1.3]	gi|169771699|ref|XP_001820319.1|//Kynureninase 1 [Aspergillus oryzae RIB40]
AO090026000088	1857	0.485559	42.5847	6.45454	7.7949e-11	Up	3.01736e-11	NA	NA	NA	General function prediction only ;	K10380//ankyrin	gi|83769450|dbj|BAE59585.1|//unnamed protein product [Aspergillus oryzae RIB40]
AO090701000480	2584	41.4588	3623.49	6.44956	0	Up	0	GO:0031224//intrinsic component of membrane;GO:0016021//integral component of membrane	NA	GO:0006810//transport;GO:0055085//transmembrane transport	Inorganic ion transport and metabolism ;	K14640//solute carrier family 20 (sodium-dependent phosphate transporter);K15449//tRNA wybutosine-synthesizing protein 1 [EC:4.1.3.44]	gi|391871363|gb|EIT80523.1|//hypothetical protein Ao3042_03069 [Aspergillus oryzae 3.042];gi|83772058|dbj|BAE62188.1|//unnamed protein product [Aspergillus oryzae RIB40]
AO090012000793	972	1.75074	152.878	6.44828	4.81422e-32	Up	1.10927e-32	NA	GO:0005506//iron ion binding;GO:0019114//catechol dioxygenase activity	GO:0044237//cellular metabolic process	Secondary metabolites biosynthesis, transport and catabolism ;	K15378//solute carrier family 45, member 1/2/4	gi|391870205|gb|EIT79391.1|//protocatechuate 3,4-dioxygenase beta subunit [Aspergillus oryzae 3.042]
AO090010000079	824	4.08193	353.971	6.43824	3.76154e-72	Up	5.38451e-73	NA	GO:0016829//lyase activity;GO:0016846//carbon-sulfur lyase activity	GO:0008152//metabolic process	Function unknown ;	K01164//ribonuclease P/MRP protein subunit POP1 [EC:3.1.26.5]	gi|169785329|ref|XP_001827125.1|//hypothetical protein AOR_1_134024 [Aspergillus oryzae RIB40]
AO090701000316	1011	1.31881	113.278	6.42449	2.8376e-25	Up	7.31146e-26	NA	GO:0016823//hydrolase activity, acting on acid carbon-carbon bonds, in ketonic substances	NA	Carbohydrate transport and metabolism ;	K03417//methylisocitrate lyase [EC:4.1.3.30]	gi|169777425|ref|XP_001823178.1|//oxaloacetate acetylhydrolase [Aspergillus oryzae RIB40]
AO090038000220	858	1.74255	145.94	6.38804	3.86997e-32	Up	8.89918e-33	GO:0016021//integral component of membrane	NA	NA	NA	K20309//trafficking protein particle complex subunit 12	gi|238501272|ref|XP_002381870.1|//conserved hypothetical protein [Aspergillus flavus NRRL3357];gi|83773913|dbj|BAE64038.1|//unnamed protein product [Aspergillus oryzae RIB40]
AO090038000092	1044	41.2441	3434.46	6.37975	0	Up	0	NA	GO:0016773//phosphotransferase activity, alcohol group as acceptor	GO:0019321//pentose metabolic process;GO:0006796//phosphate-containing compound metabolic process	Carbohydrate transport and metabolism ;	K00852//ribokinase [EC:2.7.1.15]	gi|169781214|ref|XP_001825070.1|//ribokinase [Aspergillus oryzae RIB40]
AO090003000212	702	7.47898	614.547	6.36054	1.62339e-125	Up	1.61846e-126	GO:0044424//intracellular part	GO:0016859//cis-trans isomerase activity	GO:0006520//cellular amino acid metabolic process	Posttranslational modification, protein turnover, chaperones ;	K01800//maleylacetoacetate isomerase [EC:5.2.1.2]	gi|169769913|ref|XP_001819426.1|//maleylacetoacetate isomerase [Aspergillus oryzae RIB40]
AO090103000020	1702	76.5074	6172.88	6.3342	0	Up	0	NA	GO:0004342//glucosamine-6-phosphate deaminase activity;GO:0016787//hydrolase activity;GO:0016861//intramolecular oxidoreductase activity, interconverting aldoses and ketoses	GO:0006041//glucosamine metabolic process;GO:0006044//N-acetylglucosamine metabolic process;GO:0005975//carbohydrate metabolic process	Carbohydrate transport and metabolism ;	K02564//glucosamine-6-phosphate deaminase [EC:3.5.99.6]	gi|169784358|ref|XP_001826640.1|//glucosamine-6-phosphate isomerase [Aspergillus oryzae RIB40]
AO090023000491	4223	18.9465	1496.32	6.30334	7.4875e-301	Up	3.98396e-302	GO:0031224//intrinsic component of membrane;GO:0016021//integral component of membrane	GO:0022857//transmembrane transporter activity;GO:0022891//substrate-specific transmembrane transporter activity	GO:0008643//carbohydrate transport;GO:0055085//transmembrane transport;GO:0071702//organic substance transport	Carbohydrate transport and metabolism ; Amino acid transport and metabolism ; Inorganic ion transport and metabolism ; General function prediction only ;	K08139//MFS transporter, SP family, sugar:H+ symporter	gi|952554177|dbj|GAQ05352.1|//high-affinity glucose transporter [Aspergillus lentulus];gi|169773131|ref|XP_001821034.1|//MFS monosaccharide transporter [Aspergillus oryzae RIB40]
AO090020000710	948	95.3944	7390.91	6.2757	0	Up	0	NA	NA	NA	NA	NA	gi|83773725|dbj|BAE63852.1|//unnamed protein product [Aspergillus oryzae RIB40];gi|238504723|ref|XP_002383592.1|//conserved hypothetical protein [Aspergillus flavus NRRL3357];gi|317155199|ref|XP_003190568.1|//hypothetical protein AOR_1_1238084 [Aspergillus oryzae RIB40]
AO090038000214	1259	0.687877	53.1145	6.27081	2.02089e-13	Up	7.12324e-14	NA	GO:0016787//hydrolase activity	GO:0044238//primary metabolic process;GO:0006629//lipid metabolic process	Lipid transport and metabolism ;	K01046//triacylglycerol lipase [EC:3.1.1.3];K21016//feruloyl esterase [EC:3.1.1.73]	gi|238501266|ref|XP_002381867.1|//lipase precursor, putative [Aspergillus flavus NRRL3357];gi|83773909|dbj|BAE64034.1|//unnamed protein product [Aspergillus oryzae RIB40]
AO090701000844	546	0.890891	68.4343	6.26333	4.67493e-17	Up	1.48214e-17	NA	NA	NA	NA	NA	gi|83772367|dbj|BAE62497.1|//unnamed protein product [Aspergillus oryzae RIB40]
AO090103000465	636	8.96251	683.726	6.25337	6.12621e-144	Up	5.56057e-145	NA	NA	NA	NA	NA	gi|169785120|ref|XP_001827021.1|//hypothetical protein AOR_1_772034 [Aspergillus oryzae RIB40]
AO090038000306	1488	5.06704	384.719	6.24652	8.54027e-14	Up	2.96704e-14	NA	GO:0016301//kinase activity	GO:0007186//G-protein coupled receptor signaling pathway;GO:0006796//phosphate-containing compound metabolic process	Lipid transport and metabolism ; General function prediction only ;	K04718//sphingosine kinase [EC:2.7.1.91]	gi|83773987|dbj|BAE64112.1|//unnamed protein product [Aspergillus oryzae RIB40]
AO090701000479	312	0.251346	18.8712	6.23037	5.78307e-07	Up	2.63627e-07	GO:0005789//endoplasmic reticulum membrane	GO:0016787//hydrolase activity	GO:0046488//phosphatidylinositol metabolic process;GO:0015031//protein transport	NA	NA	gi|83772057|dbj|BAE62187.1|//unnamed protein product [Aspergillus oryzae RIB40]
AO090206r00002	157	2.59474	191.014	6.20194	2.01457e-42	Up	3.94271e-43	NA	NA	NA	NA	NA	gi|350632765|gb|EHA21132.1|//hypothetical protein ASPNIDRAFT_195520 [Aspergillus niger ATCC 1015]
AO090120000401	876	0.250149	18.3362	6.19576	7.06498e-07	Up	3.23429e-07	NA	GO:0003824//catalytic activity	NA	NA	K14859//ribosome biogenesis protein SSF1/2	gi|83772855|dbj|BAE62983.1|//unnamed protein product [Aspergillus oryzae RIB40]
AO090012000525	2598	21.0615	1523.24	6.17639	0	Up	0	GO:0043231//intracellular membrane-bounded organelle	GO:0046914//transition metal ion binding;GO:0001071//nucleic acid binding transcription factor activity;GO:0003676//nucleic acid binding	GO:0006351//transcription, DNA-templated	NA	K09240//transcriptional regulatory protein CAT8	gi|83770557|dbj|BAE60690.1|//unnamed protein product [Aspergillus oryzae RIB40]
AO090005000080	2881	3.44326	245.837	6.15779	1.27388e-53	Up	2.16711e-54	NA	NA	NA	NA	NA	gi|914758338|gb|KOC12308.1|//hypothetical protein AFLA70_353g001081 [Aspergillus flavus AF70];gi|83765053|dbj|BAE55196.1|//unnamed protein product [Aspergillus oryzae RIB40]
AO090023000596	713	16.6084	1172.69	6.14177	6.64302e-246	Up	4.10335e-247	NA	NA	NA	NA	NA	gi|914755032|gb|KOC09197.1|//hypothetical protein AFLA70_77g002970 [Aspergillus flavus AF70];gi|238491284|ref|XP_002376879.1|//conserved hypothetical protein [Aspergillus flavus NRRL3357]
AO090011000052	1134	0.892069	62.7498	6.13631	3.96162e-16	Up	1.28772e-16	NA	GO:0008238//exopeptidase activity;GO:0004871//signal transducer activity	GO:0019538//protein metabolic process	General function prediction only ;	K05994//bacterial leucyl aminopeptidase [EC:3.4.11.10]	gi|169782566|ref|XP_001825745.1|//leucine aminopeptidase 1 [Aspergillus oryzae RIB40]
AO090001000508	1323	38.488	2675.7	6.11936	0	Up	0	NA	GO:0032561//guanyl ribonucleotide binding;GO:0017111//nucleoside-triphosphatase activity	GO:0009207//purine ribonucleoside triphosphate catabolic process	Translation, ribosomal structure and biogenesis ;	NA	gi|169769100|ref|XP_001819020.1|//hypothetical protein AOR_1_894164 [Aspergillus oryzae RIB40]
AO090010000681	372	0.250155	17.3534	6.11625	1.14667e-06	Up	5.30533e-07	NA	NA	NA	NA	NA	gi|83776383|dbj|BAE66502.1|//unnamed protein product [Aspergillus oryzae RIB40]
AO090003001490	1725	0.250528	17.2765	6.10769	1.21922e-06	Up	5.64324e-07	NA	NA	GO:0006810//transport	Carbohydrate transport and metabolism ; Amino acid transport and metabolism ; Inorganic ion transport and metabolism ; General function prediction only ;	K01952//phosphoribosylformylglycinamidine synthase [EC:6.3.5.3];K16066//3-hydroxy acid dehydrogenase / malonic semialdehyde reductase [EC:1.1.1.381 1.1.1.-];K13095//splicing factor 1;K10866//DNA repair protein RAD50 [EC:3.6.-.-];K14708//solute carrier family 26 (sodium-independent sulfate anion transporter), member 11	gi|83768393|dbj|BAE58532.1|//unnamed protein product [Aspergillus oryzae RIB40]
AO090103000486	1438	49.314	3395.48	6.10547	0	Up	0	NA	NA	NA	NA	K00831//phosphoserine aminotransferase [EC:2.6.1.52]	gi|83775784|dbj|BAE65904.1|//unnamed protein product [Aspergillus oryzae RIB40];gi|317158364|ref|XP_001827037.2|//hypothetical protein AOR_1_796034 [Aspergillus oryzae RIB40]
AO090023000450	1551	1.52933	103.567	6.08153	7.77962e-25	Up	2.02959e-25	GO:0016021//integral component of membrane	GO:0016705//oxidoreductase activity, acting on paired donors, with incorporation or reduction of molecular oxygen;GO:0020037//heme binding;GO:0005506//iron ion binding;GO:0004497//monooxygenase activity;GO:0016491//oxidoreductase activity	GO:0055114//oxidation-reduction process	Secondary metabolites biosynthesis, transport and catabolism ;	K00493//unspecific monooxygenase [EC:1.14.14.1];K07824//benzoate 4-monooxygenase [EC:1.14.13.12]	gi|293329803|dbj|BAJ04411.1|//cytochrome P450 monooxygenase [Aspergillus oryzae];gi|317145686|ref|XP_001820997.2|//benzoate 4-monooxygenase cytochrome P450 [Aspergillus oryzae RIB40]
AO090012000567	1866	0.256129	17.1863	6.06825	1.6581e-06	Up	7.73412e-07	NA	NA	NA	NA	K14862//nucleolar pre-ribosomal-associated protein 2	gi|83770593|dbj|BAE60726.1|//unnamed protein product [Aspergillus oryzae RIB40]
AO090020000191	801	67.7821	4531.54	6.06295	0	Up	0	NA	NA	NA	NA	NA	gi|169780162|ref|XP_001824545.1|//hypothetical protein AOR_1_340084 [Aspergillus oryzae RIB40]
AO090005000371	4652	17.8866	1189.08	6.05483	1.82572e-255	Up	1.0874e-256	GO:0044464//cell part	GO:0046914//transition metal ion binding	GO:0055086//nucleobase-containing small molecule metabolic process	Nucleotide transport and metabolism ;	K15110//solute carrier family 25 (mitochondrial 2-oxodicarboxylate transporter), member 21;K17846//krueppel-like factor 4;K11215//transcription factor STE12;K09238//metallothionein expression activator;K02155//V-type H+-transporting ATPase 16kDa proteolipid subunit	gi|317141147|ref|XP_001817444.2|//zinc finger protein [Aspergillus oryzae RIB40];gi|83765299|dbj|BAE55442.1|//unnamed protein product [Aspergillus oryzae RIB40]
AO090011000244	998	1.09965	73.0601	6.05397	1.08217e-18	Up	3.26653e-19	NA	GO:0051537//2 iron, 2 sulfur cluster binding;GO:0016708//oxidoreductase activity, acting on paired donors, with incorporation or reduction of molecular oxygen, NAD(P)H as one donor, and incorporation of two atoms of oxygen into one donor;GO:0005506//iron ion binding;GO:0046914//transition metal ion binding;GO:0051536//iron-sulfur cluster binding;GO:0016491//oxidoreductase activity	GO:0019439//aromatic compound catabolic process;GO:0044237//cellular metabolic process;GO:0055114//oxidation-reduction process	Inorganic ion transport and metabolism ; General function prediction only ;	NA	gi|83774654|dbj|BAE64777.1|//unnamed protein product [Aspergillus oryzae RIB40]
AO090023000349	1158	108.338	7167.6	6.04788	0	Up	0	NA	NA	NA	Energy production and conversion ;	K00167//2-oxoisovalerate dehydrogenase E1 component beta subunit [EC:1.2.4.4]	gi|169772879|ref|XP_001820908.1|//2-oxoisovalerate dehydrogenase subunit beta [Aspergillus oryzae RIB40]
AO090701000554	501	1036.59	67607.1	6.02725	0	Up	0	NA	NA	GO:0050896//response to stimulus	Posttranslational modification, protein turnover, chaperones ;	K13993//HSP20 family protein	gi|169777839|ref|XP_001823385.1|//heat shock protein [Aspergillus oryzae RIB40]
AO090001000555	1541	127.05	8183.2	6.00919	0	Up	0	NA	GO:0016624//oxidoreductase activity, acting on the aldehyde or oxo group of donors, disulfide as acceptor;GO:0016903//oxidoreductase activity, acting on the aldehyde or oxo group of donors	GO:0055114//oxidation-reduction process	Energy production and conversion ;	K00166//2-oxoisovalerate dehydrogenase E1 component alpha subunit [EC:1.2.4.4]	gi|317142748|ref|XP_001819066.2|//2-oxoisovalerate dehydrogenase subunit alpha [Aspergillus oryzae RIB40];gi|816338512|gb|KKK17365.1|//putative 2-oxoisovalerate dehydrogenase complex alpha subunit [Aspergillus ochraceoroseus]
AO090701000219	1113	166.32	10707.8	6.00855	2.0219e-101	Up	2.33031e-102	NA	GO:0005515//protein binding	NA	Posttranslational modification, protein turnover, chaperones ;	K09510//DnaJ homolog subfamily B member 4	gi|914755930|gb|KOC10095.1|//DnaJ domain protein [Aspergillus flavus AF70]
AO090005000942	2763	50.7901	3230.4	5.99102	0	Up	0	NA	GO:0016407//acetyltransferase activity	NA	Transcription ; General function prediction only ;	K15361//WD repeat-containing protein 48;K10437//phenylacetate 2-hydroxylase [EC:1.14.13.-]	gi|83765800|dbj|BAE55943.1|//unnamed protein product [Aspergillus oryzae RIB40];gi|317140061|ref|XP_001817945.2|//acetyltransferase, GNAT family [Aspergillus oryzae RIB40]
AO090038000262	1002	5.99136	378.092	5.97971	2.161e-84	Up	2.79102e-85	NA	GO:0016791//phosphatase activity	NA	Carbohydrate transport and metabolism ;	K01092//myo-inositol-1(or 4)-monophosphatase [EC:3.1.3.25]	gi|169781488|ref|XP_001825207.1|//protein qutG [Aspergillus oryzae RIB40]
AO090138000114	2190	1.52866	95.9167	5.97144	1.40571e-23	Up	3.77857e-24	NA	GO:0004175//endopeptidase activity	GO:0019538//protein metabolic process	NA	NA	gi|169782319|ref|XP_001825622.1|//zinc metallopeptidase mde10 [Aspergillus oryzae RIB40]
AO090103000154	4217	3.2298	202.168	5.96797	4.04693e-47	Up	7.38379e-48	GO:0043231//intracellular membrane-bounded organelle;GO:0016021//integral component of membrane	GO:0046914//transition metal ion binding;GO:0001071//nucleic acid binding transcription factor activity	GO:0006351//transcription, DNA-templated	NA	K02920//large subunit ribosomal protein L36e;K00108//choline dehydrogenase [EC:1.1.99.1];K06123//1-acylglycerone phosphate reductase [EC:1.1.1.101];K01824//cholestenol Delta-isomerase [EC:5.3.3.5];K14213//Xaa-Pro dipeptidase [EC:3.4.13.9]	gi|83775500|dbj|BAE65620.1|//unnamed protein product [Aspergillus oryzae RIB40]
AO090020000639	1611	11.3074	705.644	5.9636	9.9069e-154	Up	8.50883e-155	GO:0031224//intrinsic component of membrane	GO:0022857//transmembrane transporter activity	GO:0071702//organic substance transport	Carbohydrate transport and metabolism ; Amino acid transport and metabolism ; Inorganic ion transport and metabolism ; General function prediction only ;	K15196//transcription factor IIIB 90 kDa subunit;K08139//MFS transporter, SP family, sugar:H+ symporter;K00382//dihydrolipoamide dehydrogenase [EC:1.8.1.4]	gi|169780920|ref|XP_001824924.1|//sugar transporter [Aspergillus oryzae RIB40]
AO090010000085	1709	8.74593	538.553	5.94433	2.88489e-119	Up	2.97704e-120	NA	GO:0000166//nucleotide binding;GO:0010181//FMN binding;GO:0003824//catalytic activity;GO:0016491//oxidoreductase activity	GO:0008152//metabolic process;GO:0055114//oxidation-reduction process	Energy production and conversion ;	K00101//L-lactate dehydrogenase (cytochrome) [EC:1.1.2.3]	gi|83775878|dbj|BAE65997.1|//unnamed protein product [Aspergillus oryzae RIB40];gi|317158625|ref|XP_001827130.2|//(S)-2-hydroxy-acid oxidase [Aspergillus oryzae RIB40]
AO090012000371	420	0.248808	15.2546	5.93806	3.21668e-06	Up	1.52054e-06	NA	NA	NA	General function prediction only ;	NA	gi|83770428|dbj|BAE60561.1|//unnamed protein product [Aspergillus oryzae RIB40]
AO090010000171	5334	1.09961	66.8797	5.9265	1.25066e-17	Up	3.89601e-18	GO:0044424//intracellular part	GO:0046872//metal ion binding;GO:0016408//C-acyltransferase activity;GO:0016780//phosphotransferase activity, for other substituted phosphate groups	GO:0009058//biosynthetic process;GO:0006631//fatty acid metabolic process	Lipid transport and metabolism ;	K00667//fatty acid synthase subunit alpha, fungi type [EC:2.3.1.86]	gi|169785491|ref|XP_001827206.1|//3-oxoacyl-[acyl-carrier-protein] synthase [Aspergillus oryzae RIB40]
AO090001000103	952	0.251277	14.7225	5.8726	4.7867e-06	Up	2.27988e-06	GO:0031224//intrinsic component of membrane;GO:0016021//integral component of membrane	NA	NA	NA	K00606//3-methyl-2-oxobutanoate hydroxymethyltransferase [EC:2.1.2.11]	gi|238497670|ref|XP_002380070.1|//neutral amino acid permease [Aspergillus flavus NRRL3357];gi|83766517|dbj|BAE56657.1|//unnamed protein product [Aspergillus oryzae RIB40]
AO090003000164	1799	415.723	24304.7	5.86947	0	Up	0	NA	GO:0016769//transferase activity, transferring nitrogenous groups;GO:0016846//carbon-sulfur lyase activity;GO:0048037//cofactor binding;GO:0003824//catalytic activity;GO:0030170//pyridoxal phosphate binding	GO:0008652//cellular amino acid biosynthetic process;GO:0009058//biosynthetic process	Amino acid transport and metabolism ;	K00814//alanine transaminase [EC:2.6.1.2]	gi|115398952|ref|XP_001215065.1|//hypothetical protein ATEG_05887 [Aspergillus terreus NIH2624];gi|317032218|ref|XP_001394263.2|//alanine aminotransferase [Aspergillus niger CBS 513.88];gi|169769837|ref|XP_001819388.1|//alanine aminotransferase [Aspergillus oryzae RIB40]
AO090003000201	6543	97.2952	5674.87	5.86608	0	Up	0	NA	NA	NA	NA	NA	gi|238487776|ref|XP_002375126.1|//hypothetical protein AFLA_036160 [Aspergillus flavus NRRL3357];gi|238487774|ref|XP_002375125.1|//conserved hypothetical protein [Aspergillus flavus NRRL3357]
AO090011000229	2421	16.403	947.674	5.85236	1.41124e-209	Up	1.00292e-210	NA	GO:0016641//oxidoreductase activity, acting on the CH-NH2 group of donors, oxygen as acceptor;GO:0046914//transition metal ion binding;GO:0048037//cofactor binding	GO:0006807//nitrogen compound metabolic process	Secondary metabolites biosynthesis, transport and catabolism ;	K00276//primary-amine oxidase [EC:1.4.3.21]	gi|169782870|ref|XP_001825897.1|//membrane copper amine oxidase [Aspergillus oryzae RIB40]
AO090026000718	426	0.678381	39.0969	5.84881	1.94968e-11	Up	7.38019e-12	NA	NA	NA	NA	NA	gi|238496047|ref|XP_002379259.1|//conserved hypothetical protein [Aspergillus flavus NRRL3357]
AO090120000410	537	0.893842	51.5128	5.84877	5.21168e-14	Up	1.79912e-14	GO:0044464//cell part	GO:0070011//peptidase activity, acting on L-amino acid peptides	GO:0019538//protein metabolic process	Intracellular trafficking, secretion, and vesicular transport ;	K09647//mitochondrial inner membrane protease subunit 1 [EC:3.4.21.-]	gi|169779319|ref|XP_001824124.1|//signal peptidase [Aspergillus oryzae RIB40]
AO090003001248	1293	44.242	2475.14	5.80595	0	Up	0	NA	GO:0005506//iron ion binding;GO:0016701//oxidoreductase activity, acting on single donors with incorporation of molecular oxygen	NA	NA	K00463//indoleamine 2,3-dioxygenase [EC:1.13.11.52]	gi|169771701|ref|XP_001820320.1|//indoleamine 2,3-dioxygenase family protein [Aspergillus oryzae RIB40]
AO090003001008	1431	97.9305	5355.99	5.77325	0	Up	0	NA	GO:0016747//transferase activity, transferring acyl groups other than amino-acyl groups;GO:0005488//binding	GO:0035337//fatty-acyl-CoA metabolic process	Energy production and conversion ;	K09699//2-oxoisovalerate dehydrogenase E2 component (dihydrolipoyl transacylase) [EC:2.3.1.168]	gi|238486162|ref|XP_002374319.1|//biotin-dependent 2-oxo acid dehydrogenases acyltransferase, putative [Aspergillus flavus NRRL3357]
AO090003000210	1350	36.1486	1970.42	5.76842	0	Up	0	NA	GO:0016702//oxidoreductase activity, acting on single donors with incorporation of molecular oxygen, incorporation of two atoms of oxygen	GO:0006558//L-phenylalanine metabolic process	Secondary metabolites biosynthesis, transport and catabolism ;	K00451//homogentisate 1,2-dioxygenase [EC:1.13.11.5]	gi|169769909|ref|XP_001819424.1|//homogentisate 1,2-dioxygenase [Aspergillus oryzae RIB40]
AO090023000147	843	111.3	6055.53	5.76573	0	Up	0	NA	GO:0016741//transferase activity, transferring one-carbon groups	GO:0006730//one-carbon metabolic process	NA	K01426//amidase [EC:3.5.1.4]	gi|169772517|ref|XP_001820727.1|//methyltransferase [Aspergillus oryzae RIB40]
AO090038000160	1607	4.07095	218.503	5.74615	3.02943e-52	Up	5.2122e-53	NA	GO:0003824//catalytic activity;GO:0016491//oxidoreductase activity	GO:0055114//oxidation-reduction process	Energy production and conversion ;	NA	gi|83773870|dbj|BAE63995.1|//unnamed protein product [Aspergillus oryzae RIB40]
AO090023000004	339	0.459995	23.9586	5.70278	3.45675e-08	Up	1.48542e-08	NA	NA	NA	NA	NA	gi|169772259|ref|XP_001820598.1|//hypothetical protein AOR_1_6144 [Aspergillus oryzae RIB40]
AO090038000093	803	0.463774	24.1005	5.6995	3.7744e-08	Up	1.62539e-08	NA	NA	NA	NA	NA	gi|83773813|dbj|BAE63938.1|//unnamed protein product [Aspergillus oryzae RIB40];gi|317155400|ref|XP_001825071.2|//hypothetical protein AOR_1_152074 [Aspergillus oryzae RIB40]
AO090120000052	3213	144.032	7451.76	5.69312	0	Up	0	NA	GO:0003824//catalytic activity;GO:0005488//binding	GO:0044238//primary metabolic process	Carbohydrate transport and metabolism ;	K01194//alpha,alpha-trehalase [EC:3.2.1.28]	gi|391870826|gb|EIT79996.1|//acid trehalase [Aspergillus oryzae 3.042]
AO090012000372	1240	65.4432	3294.87	5.65383	0	Up	0	NA	GO:0003847//1-alkyl-2-acetylglycerophosphocholine esterase activity	GO:0016042//lipid catabolic process;GO:0006629//lipid metabolic process	General function prediction only ;	K01062//platelet-activating factor acetylhydrolase [EC:3.1.1.47]	gi|83770429|dbj|BAE60562.1|//unnamed protein product [Aspergillus oryzae RIB40]
AO09M000000014	762	2.17031	109.069	5.65119	8.92972e-27	Up	2.23757e-27	GO:0031224//intrinsic component of membrane;GO:0043231//intracellular membrane-bounded organelle;GO:0019866//organelle inner membrane	GO:0005506//iron ion binding;GO:0015002//heme-copper terminal oxidase activity	GO:0022900//electron transport chain;GO:0051234//establishment of localization	Energy production and conversion ;	K02261//cytochrome c oxidase subunit 2	gi|380702236|gb|AFD96005.1|//cytochrome oxidase subunit 2 (mitochondrion) [Aspergillus oryzae]
AO090038000171	1791	1.73304	86.4504	5.6405	4.77465e-23	Up	1.2953e-23	NA	GO:0016879//ligase activity, forming carbon-nitrogen bonds;GO:0016811//hydrolase activity, acting on carbon-nitrogen (but not peptide) bonds, in linear amides;GO:0016884//carbon-nitrogen ligase activity, with glutamine as amido-N-donor;GO:0004040//amidase activity	GO:0006525//arginine metabolic process;GO:0009073//aromatic amino acid family biosynthetic process;GO:0034251//regulation of cellular amide catabolic process	Translation, ribosomal structure and biogenesis ;	K01426//amidase [EC:3.5.1.4]	gi|317155480|ref|XP_001825134.2|//acetamidase [Aspergillus oryzae RIB40];gi|83773876|dbj|BAE64001.1|//unnamed protein product [Aspergillus oryzae RIB40]
AO090701000327	879	0.244327	12.0995	5.62999	1.6212e-05	Up	7.99305e-06	NA	NA	NA	General function prediction only ;	NA	gi|83771924|dbj|BAE62054.1|//unnamed protein product [Aspergillus oryzae RIB40]
AO090001000633	3957	28.0862	1388.12	5.62712	0	Up	0	GO:0043231//intracellular membrane-bounded organelle;GO:0005634//nucleus	GO:0003677//DNA binding;GO:0000981//RNA polymerase II transcription factor activity, sequence-specific DNA binding;GO:0046914//transition metal ion binding;GO:0008270//zinc ion binding;GO:0001071//nucleic acid binding transcription factor activity;GO:0003676//nucleic acid binding	GO:0006357//regulation of transcription from RNA polymerase II promoter;GO:0006351//transcription, DNA-templated	NA	K19475//WAS/WASL-interacting protein;K05747//Wiskott-Aldrich syndrome protein;K12613//mRNA-decapping enzyme subunit 2 [EC:3.6.1.62]	gi|169769328|ref|XP_001819134.1|//C6 transcription factor [Aspergillus oryzae RIB40]
AO090701000593	825	0.246712	12.1736	5.62479	1.69561e-05	Up	8.3711e-06	NA	NA	NA	NA	NA	gi|83772154|dbj|BAE62284.1|//unnamed protein product [Aspergillus oryzae RIB40]
AO090003000124	1041	21.6969	1067.6	5.62074	4.05941e-255	Up	2.42526e-256	NA	GO:0048037//cofactor binding	GO:0008152//metabolic process	NA	NA	gi|169769769|ref|XP_001819354.1|//NAD dependent epimerase/dehydratase [Aspergillus oryzae RIB40]
AO090012000195	405	0.246812	12.122	5.61807	1.76041e-05	Up	8.70075e-06	NA	GO:0042578//phosphoric ester hydrolase activity	GO:0044238//primary metabolic process	NA	NA	gi|83770279|dbj|BAE60412.1|//unnamed protein product [Aspergillus oryzae RIB40]
AO090012000698	492	0.248317	12.0756	5.60377	1.92151e-05	Up	9.5253e-06	NA	GO:0016879//ligase activity, forming carbon-nitrogen bonds;GO:0050662//coenzyme binding;GO:0016491//oxidoreductase activity	GO:0044281//small molecule metabolic process	Amino acid transport and metabolism ;	K00108//choline dehydrogenase [EC:1.1.99.1]	gi|83770698|dbj|BAE60831.1|//unnamed protein product [Aspergillus oryzae RIB40]
AO090003001542	777	1.31525	63.7664	5.59939	4.06785e-17	Up	1.28667e-17	GO:0043231//intracellular membrane-bounded organelle	GO:0046914//transition metal ion binding;GO:0001071//nucleic acid binding transcription factor activity;GO:0003676//nucleic acid binding	GO:0006351//transcription, DNA-templated	NA	NA	gi|83768437|dbj|BAE58576.1|//unnamed protein product [Aspergillus oryzae RIB40]
AO090012000353	1347	17.2554	828.035	5.58457	6.72158e-192	Up	5.05526e-193	NA	NA	NA	NA	NA	gi|83770410|dbj|BAE60543.1|//unnamed protein product [Aspergillus oryzae RIB40]
AO090103000362	651	14.9136	708.617	5.5703	1.00332e-167	Up	8.28483e-169	NA	NA	NA	NA	NA	gi|635506874|gb|KDE78906.1|//hypothetical protein AO1008_05299 [Aspergillus oryzae 100-8];gi|238507826|ref|XP_002385114.1|//conserved hypothetical protein [Aspergillus flavus NRRL3357]
AO090038000187	9620	281.625	13291.5	5.56058	0	Up	0	GO:0031224//intrinsic component of membrane;GO:0016021//integral component of membrane	GO:0043169//cation binding;GO:0046872//metal ion binding;GO:0032559//adenyl ribonucleotide binding;GO:0019829//cation-transporting ATPase activity;GO:0000166//nucleotide binding;GO:0043682//copper-transporting ATPase activity	GO:0035434//copper ion transmembrane transport;GO:0009206//purine ribonucleoside triphosphate biosynthetic process;GO:0098655//cation transmembrane transport;GO:0030001//metal ion transport	Inorganic ion transport and metabolism ;	K01533//Cu2+-exporting ATPase [EC:3.6.3.4]	gi|83773889|dbj|BAE64014.1|//unnamed protein product [Aspergillus oryzae RIB40]
AO090012000752	1734	0.677527	31.8746	5.55599	5.88992e-10	Up	2.36345e-10	NA	GO:0016831//carboxy-lyase activity;GO:0046872//metal ion binding;GO:0019842//vitamin binding	NA	Carbohydrate transport and metabolism ; Coenzyme transport and metabolism ; General function prediction only ;	K01568//pyruvate decarboxylase [EC:4.1.1.1]	gi|169763628|ref|XP_001727714.1|//pyruvate decarboxylase [Aspergillus oryzae RIB40]
AO090003000238	5307	669.709	31399.8	5.55107	0	Up	0	GO:0016021//integral component of membrane	NA	GO:0006810//transport;GO:0055085//transmembrane transport	Carbohydrate transport and metabolism ; Amino acid transport and metabolism ; Inorganic ion transport and metabolism ; General function prediction only ;	K08157//MFS transporter, DHA1 family, multidrug resistance protein	gi|83767307|dbj|BAE57446.1|//unnamed protein product [Aspergillus oryzae RIB40];gi|391864090|gb|EIT73388.1|//synaptic vesicle transporter SVOP [Aspergillus oryzae 3.042]
AO090701000326	474	0.457174	21.4253	5.55043	1.09968e-07	Up	4.82267e-08	NA	NA	NA	NA	NA	gi|169777441|ref|XP_001823186.1|//hypothetical protein AOR_1_598114 [Aspergillus oryzae RIB40]
AO090023000065	414	1.30892	61.2485	5.54823	3.90034e-17	Up	1.23333e-17	NA	GO:0016829//lyase activity	NA	Function unknown ;	NA	gi|238490270|ref|XP_002376372.1|//DUF636 domain protein [Aspergillus flavus NRRL3357]
AO090012000071	666	83.9022	3863	5.52487	0	Up	0	NA	NA	NA	NA	NA	gi|83770174|dbj|BAE60307.1|//unnamed protein product [Aspergillus oryzae RIB40]
AO090138000157	813	7.89354	362.322	5.52046	1.67985e-88	Up	2.09382e-89	GO:0043231//intracellular membrane-bounded organelle	NA	NA	NA	NA	gi|169782397|ref|XP_001825661.1|//hypothetical protein AOR_1_254064 [Aspergillus oryzae RIB40]
AO090011000358	1680	104.26	4775.1	5.51727	1.28414e-214	Up	8.92502e-216	NA	GO:0003824//catalytic activity;GO:0050662//coenzyme binding	GO:0008152//metabolic process	Energy production and conversion ;	K03885//NADH dehydrogenase [EC:1.6.99.3]	gi|83774750|dbj|BAE64873.1|//unnamed protein product [Aspergillus oryzae RIB40]
AO090005001397	1239	100.716	4612.27	5.51712	0	Up	0	NA	GO:0004672//protein kinase activity	NA	NA	NA	gi|83766179|dbj|BAE56322.1|//unnamed protein product [Aspergillus oryzae RIB40]
AO090038000028	362	0.244383	11.1721	5.51461	2.87123e-05	Up	1.43998e-05	NA	NA	NA	NA	NA	gi|83773760|dbj|BAE63885.1|//unnamed protein product [Aspergillus oryzae RIB40]
AO090005000216	720	0.671068	30.2296	5.49336	9.05491e-10	Up	3.66514e-10	NA	GO:0003824//catalytic activity	GO:0008152//metabolic process	Lipid transport and metabolism ; Secondary metabolites biosynthesis, transport and catabolism ; General function prediction only ;	K00059//3-oxoacyl-[acyl-carrier protein] reductase [EC:1.1.1.100];K00079//carbonyl reductase 1 [EC:1.1.1.184 1.1.1.189 1.1.1.197]	gi|169765678|ref|XP_001817310.1|//carbonyl reductase [Aspergillus oryzae RIB40]
AO090103000432	861	0.461469	20.3278	5.46107	2.44629e-07	Up	1.09332e-07	NA	NA	NA	NA	K05989//alpha-L-rhamnosidase [EC:3.2.1.40]	gi|238507692|ref|XP_002385047.1|//alpha-L-rhamnosidase family protein [Aspergillus flavus NRRL3357]
AO090009000087	399	0.670879	29.2118	5.44436	1.36222e-09	Up	5.55521e-10	NA	NA	NA	NA	NA	gi|169764257|ref|XP_001816600.1|//hypothetical protein AOR_1_148184 [Aspergillus oryzae RIB40]
AO090701000248	3351	34.4339	1491.19	5.43649	0	Up	0	GO:0043231//intracellular membrane-bounded organelle;GO:0005634//nucleus	GO:0000981//RNA polymerase II transcription factor activity, sequence-specific DNA binding;GO:0046914//transition metal ion binding;GO:0008270//zinc ion binding;GO:0001071//nucleic acid binding transcription factor activity	GO:0006357//regulation of transcription from RNA polymerase II promoter;GO:0006351//transcription, DNA-templated	NA	NA	gi|83771854|dbj|BAE61984.1|//unnamed protein product [Aspergillus oryzae RIB40]
AO090003001094	1497	265.925	11496.2	5.43399	0	Up	0	NA	NA	NA	NA	NA	gi|83768050|dbj|BAE58189.1|//unnamed protein product [Aspergillus oryzae RIB40]
AO090026000058	3822	64.8182	2795.76	5.4307	0	Up	0	NA	NA	NA	NA	K02209//DNA replication licensing factor MCM5 [EC:3.6.4.12];K01673//carbonic anhydrase [EC:4.2.1.1]	gi|317146661|ref|XP_001821558.2|//hypothetical protein AOR_1_118014 [Aspergillus oryzae RIB40];gi|83769421|dbj|BAE59556.1|//unnamed protein product [Aspergillus oryzae RIB40]
AO090003000697	861	111.777	4778.74	5.41793	0	Up	0	NA	GO:0043169//cation binding;GO:0016813//hydrolase activity, acting on carbon-nitrogen (but not peptide) bonds, in linear amidines	GO:0009064//glutamine family amino acid metabolic process	Amino acid transport and metabolism ;	K01476//arginase [EC:3.5.3.1]	gi|391867572|gb|EIT76818.1|//arginase [Aspergillus oryzae 3.042]
AO090023000590	3165	36.7707	1568.49	5.41467	0	Up	0	GO:0031224//intrinsic component of membrane	GO:0042625//ATPase coupled ion transmembrane transporter activity;GO:0032559//adenyl ribonucleotide binding	GO:0009206//purine ribonucleoside triphosphate biosynthetic process;GO:0006811//ion transport	Inorganic ion transport and metabolism ;	K01537//Ca2+-transporting ATPase [EC:3.6.3.8];K01536//Na+-exporting ATPase [EC:3.6.3.7]	gi|391865683|gb|EIT74962.1|//Ca2+ transporting ATPase [Aspergillus oryzae 3.042]
AO090120000270	594	0.263798	11.1158	5.39704	5.83017e-05	Up	2.97976e-05	NA	NA	NA	NA	NA	gi|83772742|dbj|BAE62870.1|//unnamed protein product [Aspergillus oryzae RIB40]
BGI_novel_G000030	1564	17.2337	723.353	5.39139	7.10508e-176	Up	5.67727e-177	NA	GO:0051287//NAD binding	GO:0055114//oxidation-reduction process	NA	K00049//glyoxylate/hydroxypyruvate reductase [EC:1.1.1.79 1.1.1.81];K00058//D-3-phosphoglycerate dehydrogenase [EC:1.1.1.95];K01225//cellulose 1,4-beta-cellobiosidase [EC:3.2.1.91]	gi|914758086|gb|KOC12088.1|//putative 2-hydroxyacid dehydrogenase [Aspergillus flavus AF70]
AO090012000352	1344	0.464172	19.3075	5.37836	5.12906e-07	Up	2.33105e-07	NA	NA	GO:0006629//lipid metabolic process	NA	K01046//triacylglycerol lipase [EC:3.1.1.3]	gi|83770409|dbj|BAE60542.1|//unnamed protein product [Aspergillus oryzae RIB40]
AO090003000061	822	21.92	906.423	5.36986	3.07158e-213	Up	2.14895e-214	GO:0043231//intracellular membrane-bounded organelle;GO:0043234//protein complex	NA	GO:0006355//regulation of transcription, DNA-templated	NA	K15136//mediator of RNA polymerase II transcription subunit 18, fungi type	gi|169769659|ref|XP_001819299.1|//mediator of RNA polymerase II transcription subunit 18 [Aspergillus oryzae RIB40]
AO090138000100	975	0.676283	27.6134	5.3516	4.72551e-09	Up	1.95624e-09	NA	GO:0016830//carbon-carbon lyase activity	NA	NA	NA	gi|169782293|ref|XP_001825609.1|//hypothetical protein AOR_1_174064 [Aspergillus oryzae RIB40]
AO090009000566	804	42.9459	1748.98	5.34785	0	Up	0	NA	NA	NA	NA	K20047//actin cytoskeleton-regulatory complex protein PAN1	gi|169765065|ref|XP_001817004.1|//hypothetical protein AOR_1_932184 [Aspergillus oryzae RIB40]
AO090023000581	1403	4.28746	174.097	5.34363	4.81704e-44	Up	9.20128e-45	NA	NA	NA	Inorganic ion transport and metabolism ;	NA	gi|391865585|gb|EIT74864.1|//ABC-type Fe3+ transport system, periplasmic component [Aspergillus oryzae 3.042]
AO090003000251	2189	2.38425	95.9869	5.33123	8.42052e-25	Up	2.19757e-25	NA	NA	NA	NA	NA	gi|83767320|dbj|BAE57459.1|//unnamed protein product [Aspergillus oryzae RIB40];gi|914754164|gb|KOC08329.1|//hypothetical protein AFLA70_23g004641 [Aspergillus flavus AF70]
AO090001000164	1183	111.956	4461.94	5.31667	0	Up	0	GO:0044464//cell part	NA	NA	Cell wall/membrane/envelope biogenesis ; Carbohydrate transport and metabolism ;	K00213//7-dehydrocholesterol reductase [EC:1.3.1.21]	gi|317141582|ref|XP_003189384.1|//nmrA-like family protein [Aspergillus oryzae RIB40] ;gi|83766573|dbj|BAE56713.1|//unnamed protein product [Aspergillus oryzae RIB40]
AO090138000204	1128	1.31334	51.8879	5.30408	5.23549e-15	Up	1.75432e-15	NA	GO:0016837//carbon-oxygen lyase activity, acting on polysaccharides	GO:0044247//cellular polysaccharide catabolic process	Carbohydrate transport and metabolism ;	K01732//pectin lyase [EC:4.2.2.10]	gi|169782469|ref|XP_001825697.1|//pectin lyase F [Aspergillus oryzae RIB40]
AO090701000500	1296	1.73294	67.9329	5.29282	2.87236e-19	Up	8.54594e-20	NA	NA	NA	General function prediction only ;	K19626//inversin;K12669//oligosaccharyltransferase complex subunit gamma	gi|169777741|ref|XP_001823336.1|//homeobox-containing protein wariai [Aspergillus oryzae RIB40]
AO090009000115	2163	93.9123	3665.05	5.28637	0	Up	0	GO:0016021//integral component of membrane	GO:0015299//solute:proton antiporter activity	GO:0006810//transport;GO:1902600//hydrogen ion transmembrane transport	Inorganic ion transport and metabolism ;	NA	gi|317138823|ref|XP_001816624.2|//CPA2 familytransporter [Aspergillus oryzae RIB40];gi|83764478|dbj|BAE54622.1|//unnamed protein product [Aspergillus oryzae RIB40]
AO09M000000003	774	0.884281	34.2852	5.27694	7.82186e-11	Up	3.02851e-11	GO:0043231//intracellular membrane-bounded organelle;GO:0031224//intrinsic component of membrane;GO:0033177//proton-transporting two-sector ATPase complex, proton-transporting domain;GO:0019866//organelle inner membrane	GO:0015078//hydrogen ion transmembrane transporter activity	GO:0015986//ATP synthesis coupled proton transport	Energy production and conversion ;	K02126//F-type H+-transporting ATPase subunit a	gi|380702228|gb|AFD95997.1|//ATP synthase subunit 6 (mitochondrion) [Aspergillus oryzae]
AO090102000618	369	0.246784	9.54895	5.27402	9.08006e-05	Up	4.69258e-05	NA	NA	NA	NA	NA	gi|169776597|ref|XP_001822765.1|//hypothetical protein AOR_1_1038134 [Aspergillus oryzae RIB40]
AO09M000000008	1113	7.90134	301.438	5.25362	7.52839e-75	Up	1.05133e-75	GO:0031224//intrinsic component of membrane;GO:0043231//intracellular membrane-bounded organelle;GO:0019866//organelle inner membrane	GO:0005506//iron ion binding;GO:0015002//heme-copper terminal oxidase activity	GO:0045333//cellular respiration;GO:0051234//establishment of localization	Energy production and conversion ;	K02256//cytochrome c oxidase subunit 1 [EC:1.9.3.1]	gi|380702275|gb|AFD96042.1|//cytochrome oxidase subunit 1, partial (mitochondrion) [Aspergillus flavus]
AO09M000000007	471	1.73133	65.8169	5.24851	7.68368e-19	Up	2.30801e-19	GO:0031224//intrinsic component of membrane;GO:0043231//intracellular membrane-bounded organelle;GO:0019866//organelle inner membrane	GO:0005506//iron ion binding;GO:0015002//heme-copper terminal oxidase activity	GO:0045333//cellular respiration;GO:0051234//establishment of localization	Energy production and conversion ;	K02256//cytochrome c oxidase subunit 1 [EC:1.9.3.1]	gi|380702232|gb|AFD96001.1|//cytochrome oxidase subunit 1 (mitochondrion) [Aspergillus oryzae]
AO090026000142	534	0.23876	9.05376	5.24488	9.76361e-05	Up	5.05752e-05	NA	NA	NA	NA	K15532//unsaturated rhamnogalacturonyl hydrolase [EC:3.2.1.172]	gi|169774341|ref|XP_001821638.1|//hypothetical protein AOR_1_272014 [Aspergillus oryzae RIB40]
AO090003000709	777	89.6659	3350.13	5.22351	0	Up	0	NA	NA	NA	NA	NA	gi|169770773|ref|XP_001819856.1|//hypothetical protein AOR_1_1248154 [Aspergillus oryzae RIB40]
AO090005001649	525	5.64932	210.941	5.22262	4.60399e-05	Up	2.33823e-05	GO:0043231//intracellular membrane-bounded organelle	NA	NA	NA	K17553//protein phosphatase 1 regulatory subunit 11	gi|169768158|ref|XP_001818550.1|//type 1 phosphatases regulator ypi1 [Aspergillus oryzae RIB40]
AO090102000184	933	6.19532	230.846	5.21961	8.65901e-59	Up	1.39096e-59	GO:0031224//intrinsic component of membrane	NA	GO:0050896//response to stimulus	NA	NA	gi|169775895|ref|XP_001822414.1|//RTA1 domain protein [Aspergillus oryzae RIB40]
AO090023000331	597	25.1087	935.494	5.21947	2.01057e-225	Up	1.34371e-226	NA	NA	NA	NA	NA	gi|238490754|ref|XP_002376614.1|//hypothetical protein AFLA_107430 [Aspergillus flavus NRRL3357]
AO090701000851	1074	3.01594	110.874	5.20017	2.02602e-29	Up	4.85289e-30	NA	GO:0016616//oxidoreductase activity, acting on the CH-OH group of donors, NAD or NADP as acceptor;GO:0004616//phosphogluconate dehydrogenase (decarboxylating) activity;GO:0048037//cofactor binding;GO:0051287//NAD binding	GO:0006007//glucose catabolic process;GO:0055114//oxidation-reduction process	Lipid transport and metabolism ;	K00020//3-hydroxyisobutyrate dehydrogenase [EC:1.1.1.31]	gi|83772372|dbj|BAE62502.1|//unnamed protein product [Aspergillus oryzae RIB40];gi|317149733|ref|XP_003190348.1|//3-hydroxyisobutyrate dehydrogenase [Aspergillus oryzae RIB40]
AO090023000327	2264	37.1985	1352.98	5.18476	0	Up	0	NA	GO:0003723//RNA binding;GO:0004540//ribonuclease activity	GO:0090501//RNA phosphodiester bond hydrolysis	Cell wall/membrane/envelope biogenesis ;	K11682//SWR1-complex protein 3	gi|83768750|dbj|BAE58887.1|//unnamed protein product [Aspergillus oryzae RIB40];gi|914756975|gb|KOC11132.1|//hypothetical protein AFLA70_545g000491 [Aspergillus flavus AF70]
AO090012000374	1596	0.236772	8.53398	5.17165	0.000133006	Up	6.95333e-05	NA	GO:0003824//catalytic activity;GO:0005488//binding	NA	Inorganic ion transport and metabolism ;	K08869//aarF domain-containing kinase;K03379//cyclohexanone monooxygenase [EC:1.14.13.22]	gi|83770430|dbj|BAE60563.1|//unnamed protein product [Aspergillus oryzae RIB40]
AO090038000288	2436	459.804	16550	5.16967	0	Up	0	NA	GO:0032559//adenyl ribonucleotide binding;GO:0016462//pyrophosphatase activity	GO:0050896//response to stimulus	Posttranslational modification, protein turnover, chaperones ;	K03695//ATP-dependent Clp protease ATP-binding subunit ClpB	gi|391865398|gb|EIT74682.1|//chaperone protein [Aspergillus oryzae 3.042]
AO090012000751	924	1.7411	61.6677	5.14644	2.3055e-17	Up	7.23931e-18	NA	NA	NA	NA	NA	gi|83770741|dbj|BAE60874.1|//unnamed protein product [Aspergillus oryzae RIB40]
AO090010000532	708	6.20376	219.504	5.14496	3.6152e-55	Up	6.0503e-56	NA	NA	NA	NA	NA	gi|169786101|ref|XP_001827511.1|//hypothetical protein AOR_1_890024 [Aspergillus oryzae RIB40]
AO090026000221	732	5.98696	210.838	5.13817	1.59114e-53	Up	2.71268e-54	NA	GO:0046914//transition metal ion binding	NA	NA	K04487//cysteine desulfurase [EC:2.8.1.7]	gi|169774475|ref|XP_001821705.1|//extracellular serine-rich protein [Aspergillus oryzae RIB40]
AO090012000682	1038	3.72882	130.859	5.13315	1.43952e-12	Up	5.23038e-13	NA	NA	NA	NA	NA	gi|169763510|ref|XP_001727655.1|//hypothetical protein AOR_1_1180194 [Aspergillus oryzae RIB40]
AO090009000568	1404	530.907	18548.3	5.12668	0	Up	0	NA	GO:0016747//transferase activity, transferring acyl groups other than amino-acyl groups	GO:0005975//carbohydrate metabolic process;GO:0009060//aerobic respiration	Energy production and conversion ;	K01647//citrate synthase [EC:2.3.3.1]	gi|169765069|ref|XP_001817006.1|//citrate synthase [Aspergillus oryzae RIB40]
AO090102000166	7290	2.90774	100.731	5.11447	1.89202e-05	Up	9.37387e-06	NA	GO:0022892//substrate-specific transporter activity;GO:0003824//catalytic activity;GO:0005488//binding	GO:0008152//metabolic process	Secondary metabolites biosynthesis, transport and catabolism ;	K15394//hybrid polyketide synthase / nonribosomal peptide synthetase ACE1	gi|83771133|dbj|BAE61265.1|//unnamed protein product [Aspergillus oryzae RIB40]
AO090010000689	3990	25.9474	894.335	5.10715	9.29469e-224	Up	6.28031e-225	GO:0031224//intrinsic component of membrane;GO:0016021//integral component of membrane	GO:0015405//P-P-bond-hydrolysis-driven transmembrane transporter activity;GO:0005524//ATP binding;GO:0032559//adenyl ribonucleotide binding;GO:0017111//nucleoside-triphosphatase activity;GO:0042626//ATPase activity, coupled to transmembrane movement of substances	GO:0006810//transport;GO:0055085//transmembrane transport;GO:0009207//purine ribonucleoside triphosphate catabolic process	Defense mechanisms ;	K05658//ATP-binding cassette, subfamily B (MDR/TAP), member 1 [EC:3.6.3.44]	gi|83776389|dbj|BAE66508.1|//unnamed protein product [Aspergillus oryzae RIB40];gi|317159234|ref|XP_001827641.2|//lipid A export ATP-binding/permease protein msbA [Aspergillus oryzae RIB40]
AO090009000012	1969	3.2251	111.097	5.10634	8.15381e-30	Up	1.94499e-30	NA	GO:0016846//carbon-sulfur lyase activity;GO:0048037//cofactor binding;GO:0016740//transferase activity;GO:0003824//catalytic activity;GO:0030170//pyridoxal phosphate binding	GO:0008652//cellular amino acid biosynthetic process;GO:0009058//biosynthetic process	Amino acid transport and metabolism ;	K00814//alanine transaminase [EC:2.6.1.2];K10838//xeroderma pigmentosum group C-complementing protein;K14264//kynurenine aminotransferase [EC:2.6.1.7]	gi|83764391|dbj|BAE54535.1|//unnamed protein product [Aspergillus oryzae RIB40];gi|317138793|ref|XP_001816537.2|//aspartate aminotransferase [Aspergillus oryzae RIB40]
AO090005000213	687	0.679076	23.3852	5.10588	6.07977e-08	Up	2.64336e-08	NA	GO:0016830//carbon-carbon lyase activity	NA	Secondary metabolites biosynthesis, transport and catabolism ;	NA	gi|83765162|dbj|BAE55305.1|//unnamed protein product [Aspergillus oryzae RIB40]
AO090005001234	1749	28.6433	985.992	5.1053	8.10449e-64	Up	1.24294e-64	GO:0044464//cell part	GO:0050662//coenzyme binding;GO:0016899//oxidoreductase activity, acting on the CH-OH group of donors, oxygen as acceptor	GO:0008152//metabolic process	Energy production and conversion ;	K00107//D-arabinono-1,4-lactone oxidase [EC:1.1.3.37]	gi|169767426|ref|XP_001818184.1|//D-arabinono-1,4-lactone oxidase [Aspergillus oryzae RIB40]
AO090005000967	1755	15.55	534.933	5.10437	2.4196e-129	Up	2.36324e-130	NA	NA	NA	Function unknown ;	NA	gi|169766988|ref|XP_001817965.1|//short-chain dehydrogenase [Aspergillus oryzae RIB40]
AO090038000030	1950	14.2617	489.101	5.09992	5.984e-125	Up	5.98786e-126	NA	NA	NA	NA	NA	gi|169781114|ref|XP_001825020.1|//hypothetical protein AOR_1_48074 [Aspergillus oryzae RIB40]
AO090010000046	510	0.671659	22.9416	5.09409	5.52618e-08	Up	2.39554e-08	NA	NA	NA	NA	NA	gi|83775844|dbj|BAE65963.1|//unnamed protein product [Aspergillus oryzae RIB40]
AO090023000012	3852	16.8248	571.684	5.08656	3.41262e-138	Up	3.16664e-139	GO:0016021//integral component of membrane	NA	GO:0006810//transport;GO:0055085//transmembrane transport	Carbohydrate transport and metabolism ; Amino acid transport and metabolism ; Inorganic ion transport and metabolism ; General function prediction only ;	K17866//diphthamide biosynthesis protein 2;K11231//osomolarity two-component system, sensor histidine kinase SLN1 [EC:2.7.13.3];K00276//primary-amine oxidase [EC:1.4.3.21];K02835//peptide chain release factor 1;K03379//cyclohexanone monooxygenase [EC:1.14.13.22]	gi|83768465|dbj|BAE58602.1|//unnamed protein product [Aspergillus oryzae RIB40];gi|317145223|ref|XP_001820604.2|//monocarboxylate transporter [Aspergillus oryzae RIB40]
AO090005000479	2085	57.2154	1906.02	5.05801	0	Up	0	GO:0042579//microbody	GO:0016634//oxidoreductase activity, acting on the CH-CH group of donors, oxygen as acceptor;GO:0050662//coenzyme binding	GO:0009062//fatty acid catabolic process	Lipid transport and metabolism ;	K00232//acyl-CoA oxidase [EC:1.3.3.6]	gi|169766136|ref|XP_001817539.1|//fatty-acyl coenzyme A oxidase (Pox1) [Aspergillus oryzae RIB40]
AO09M000000016	1989	4.09459	136.379	5.05776	1.83947e-34	Up	4.0623e-35	GO:0031224//intrinsic component of membrane;GO:0043231//intracellular membrane-bounded organelle;GO:0019866//organelle inner membrane	GO:0050136//NADH dehydrogenase (quinone) activity	GO:0022904//respiratory electron transport chain;GO:0051234//establishment of localization	Energy production and conversion ; Inorganic ion transport and metabolism ;	K03883//NADH-ubiquinone oxidoreductase chain 5 [EC:1.6.5.3]	gi|380702238|gb|AFD96007.1|//NADH dehydrogenase subunit 5 (mitochondrion) [Aspergillus oryzae]
AO090009000236	618	18.7361	622.043	5.05312	6.45215e-157	Up	5.48222e-158	NA	NA	NA	NA	NA	gi|83764579|dbj|BAE54723.1|//unnamed protein product [Aspergillus oryzae RIB40]
AO090701000252	1470	2.8034	92.7591	5.04824	3.52026e-25	Up	9.08987e-26	NA	GO:0016709//oxidoreductase activity, acting on paired donors, with incorporation or reduction of molecular oxygen, NAD(P)H as one donor, and incorporation of one atom of oxygen;GO:0000166//nucleotide binding;GO:0050662//coenzyme binding	GO:0008152//metabolic process	Inorganic ion transport and metabolism ;	K14556//U3 small nucleolar RNA-associated protein 12;K03379//cyclohexanone monooxygenase [EC:1.14.13.22]	gi|83771858|dbj|BAE61988.1|//unnamed protein product [Aspergillus oryzae RIB40]
AO090005000234	867	0.667704	21.9607	5.03957	6.90983e-08	Up	3.01061e-08	NA	GO:0046914//transition metal ion binding;GO:0003824//catalytic activity	GO:0008152//metabolic process	Energy production and conversion ; General function prediction only ;	K13953//alcohol dehydrogenase, propanol-preferring [EC:1.1.1.1];K15172//transcription elongation factor SPT5;K00344//NADPH2:quinone reductase [EC:1.6.5.5]	gi|391864591|gb|EIT73886.1|//zinc-binding oxidoreductase [Aspergillus oryzae 3.042]
AO090010000627	1670	3.65326	119.586	5.03272	2.28085e-32	Up	5.22603e-33	NA	NA	NA	NA	NA	gi|914762697|gb|KOC16512.1|//hypothetical protein AFLA70_81g003341 [Aspergillus flavus AF70];gi|238507237|ref|XP_002384820.1|//conserved hypothetical protein [Aspergillus flavus NRRL3357]
AO090010000052	1324	1.73834	56.3643	5.019	3.63882e-16	Up	1.18045e-16	NA	GO:0016407//acetyltransferase activity	GO:0008152//metabolic process	NA	NA	gi|391873353|gb|EIT82396.1|//arylamine N-acetyltransferase 2 [Aspergillus oryzae 3.042];gi|317158582|ref|XP_001827102.2|//arylamine N-acetyltransferase 2 [Aspergillus oryzae RIB40]
AO090012000498	4158	698.049	22481.6	5.00928	0	Up	0	NA	GO:0046872//metal ion binding	NA	General function prediction only ;	K03034//26S proteasome regulatory subunit N4	gi|83770534|dbj|BAE60667.1|//unnamed protein product [Aspergillus oryzae RIB40];gi|391869555|gb|EIT78750.1|//hypothetical protein Ao3042_04678 [Aspergillus oryzae 3.042]
AO090026000775	1617	54.1894	1739.64	5.00463	0	Up	0	GO:0031224//intrinsic component of membrane	GO:0022857//transmembrane transporter activity	GO:0006810//transport	Carbohydrate transport and metabolism ; Amino acid transport and metabolism ; Inorganic ion transport and metabolism ; General function prediction only ;	K08139//MFS transporter, SP family, sugar:H+ symporter	gi|169775427|ref|XP_001822181.1|//sugar transporter [Aspergillus oryzae RIB40]
AO090009000541	1998	8.62282	274.627	4.99317	3.24376e-16	Up	1.05079e-16	NA	GO:0016787//hydrolase activity;GO:0003824//catalytic activity	NA	Lipid transport and metabolism ;	K03927//carboxylesterase 2 [EC:3.1.1.1 3.1.1.84 3.1.1.56];K01050//cholinesterase [EC:3.1.1.8];K01845//glutamate-1-semialdehyde 2,1-aminomutase [EC:5.4.3.8]	gi|317138537|ref|XP_001816984.2|//carboxylesterase [Aspergillus oryzae RIB40];gi|391863339|gb|EIT72650.1|//carboxylesterase type B [Aspergillus oryzae 3.042]
AO090005001473	1592	53.9783	1710.03	4.9855	0	Up	0	NA	GO:0050662//coenzyme binding;GO:0016491//oxidoreductase activity	NA	Function unknown ;	NA	gi|635507900|gb|KDE79897.1|//uncharacterized protein AO1008_06211 [Aspergillus oryzae 100-8]
AO09M000000018	1158	2.38314	73.8398	4.95346	6.11165e-20	Up	1.78348e-20	GO:0031224//intrinsic component of membrane;GO:0043231//intracellular membrane-bounded organelle;GO:0019866//organelle inner membrane	GO:0043169//cation binding;GO:0003824//catalytic activity	GO:0022900//electron transport chain;GO:0051234//establishment of localization	Energy production and conversion ;	K00412//ubiquinol-cytochrome c reductase cytochrome b subunit	gi|380702240|gb|AFD96009.1|//cytochrome b (mitochondrion) [Aspergillus oryzae]
AO090020000043	897	424.288	13119.1	4.95048	0	Up	0	NA	NA	GO:0006351//transcription, DNA-templated	NA	K09240//transcriptional regulatory protein CAT8	gi|169779918|ref|XP_001824423.1|//Zn(II)2Cys6 transcription factor [Aspergillus oryzae RIB40]
AO090011000869	1005	119.026	3651.98	4.93933	0	Up	0	GO:0031224//intrinsic component of membrane	NA	GO:0051234//establishment of localization	NA	K15111//solute carrier family 25 (mitochondrial S-adenosylmethionine transporter), member 26	gi|169783958|ref|XP_001826441.1|//hypothetical protein AOR_1_1466054 [Aspergillus oryzae RIB40]
AO090010000417	531	266.595	8141.24	4.93253	0	Up	0	NA	NA	GO:0009056//catabolic process	Cell wall/membrane/envelope biogenesis ;	K01183//chitinase [EC:3.2.1.14]	gi|169785907|ref|XP_001827414.1|//LysM domain protein [Aspergillus oryzae RIB40]
AO090001000510	2309	13.4088	409.105	4.93122	1.60807e-107	Up	1.7675e-108	GO:0031224//intrinsic component of membrane;GO:0016021//integral component of membrane	GO:0005215//transporter activity	GO:0006810//transport	Carbohydrate transport and metabolism ;	K03441//aquaglyceroporin related protein, other eukaryote	gi|317142682|ref|XP_001819022.2|//aquaglyceroporin [Aspergillus oryzae RIB40] ;gi|83766880|dbj|BAE57020.1|//unnamed protein product [Aspergillus oryzae RIB40]
AO090023000530	1260	7.47184	225.704	4.91683	1.71529e-58	Up	2.76328e-59	NA	GO:0003824//catalytic activity;GO:0050662//coenzyme binding	GO:0008152//metabolic process	General function prediction only ;	NA	gi|169773203|ref|XP_001821070.1|//apoptosis inducing factor [Aspergillus oryzae RIB40]
AO090023000803	1719	3.00565	90.7002	4.91536	1.05098e-25	Up	2.68477e-26	NA	NA	NA	NA	NA	gi|83769169|dbj|BAE59306.1|//unnamed protein product [Aspergillus oryzae RIB40];gi|914764045|gb|KOC17854.1|//hypothetical protein AFLA70_54g003831 [Aspergillus flavus AF70]
AO090011000060	2163	55.033	1653.87	4.9094	0	Up	0	GO:0031224//intrinsic component of membrane;GO:0016021//integral component of membrane	NA	NA	NA	K00606//3-methyl-2-oxobutanoate hydroxymethyltransferase [EC:2.1.2.11]	gi|83774496|dbj|BAE64619.1|//unnamed protein product [Aspergillus oryzae RIB40]
AO090005000297	768	3.64035	109.157	4.90618	4.43348e-30	Up	1.05297e-30	GO:0031224//intrinsic component of membrane	NA	NA	NA	NA	gi|169765814|ref|XP_001817378.1|//YhhN domain protein [Aspergillus oryzae RIB40]
AO090010000125	1230	51.6686	1545.77	4.90289	0	Up	0	NA	GO:0016831//carboxy-lyase activity	GO:0006644//phospholipid metabolic process	Lipid transport and metabolism ;	K01613//phosphatidylserine decarboxylase [EC:4.1.1.65]	gi|169785411|ref|XP_001827166.1|//phosphatidylserine decarboxylase [Aspergillus oryzae RIB40]
AO090701000473	1884	481.104	14310.8	4.89461	0	Up	0	GO:0031224//intrinsic component of membrane	GO:0016298//lipase activity	GO:0006644//phospholipid metabolic process	NA	K13333//lysophospholipase [EC:3.1.1.5]	gi|169777701|ref|XP_001823316.1|//lysophospholipase 1 [Aspergillus oryzae RIB40]
AO090103000123	1966	4.49542	133.62	4.89353	4.76672e-36	Up	1.02505e-36	GO:0016021//integral component of membrane	NA	NA	NA	NA	gi|317158010|ref|XP_001826727.2|//hypothetical protein AOR_1_218034 [Aspergillus oryzae RIB40];gi|914753948|gb|KOC08113.1|//hypothetical protein AFLA70_14g006040 [Aspergillus flavus AF70]
AO090020000713	1709	18.0866	528.914	4.87004	2.55921e-134	Up	2.43364e-135	GO:0043231//intracellular membrane-bounded organelle;GO:0005634//nucleus	GO:0003677//DNA binding;GO:0000981//RNA polymerase II transcription factor activity, sequence-specific DNA binding;GO:0046914//transition metal ion binding;GO:0008270//zinc ion binding;GO:0001071//nucleic acid binding transcription factor activity;GO:0003676//nucleic acid binding	GO:0006357//regulation of transcription from RNA polymerase II promoter;GO:0006351//transcription, DNA-templated	NA	K05989//alpha-L-rhamnosidase [EC:3.2.1.40];K03885//NADH dehydrogenase [EC:1.6.99.3]	gi|238504715|ref|XP_002383588.1|//conserved hypothetical protein [Aspergillus flavus NRRL3357];gi|83773728|dbj|BAE63855.1|//unnamed protein product [Aspergillus oryzae RIB40]
AO090026000045	678	0.241007	7.02917	4.86621	0.000474325	Up	0.000258187	NA	NA	NA	NA	NA	gi|83769408|dbj|BAE59543.1|//unnamed protein product [Aspergillus oryzae RIB40]
AO090010000524	1404	6.61313	192.774	4.86543	4.74605e-52	Up	8.18315e-53	GO:0031224//intrinsic component of membrane	NA	NA	Amino acid transport and metabolism ;	K14209//solute carrier family 36 (proton-coupled amino acid transporter);K00606//3-methyl-2-oxobutanoate hydroxymethyltransferase [EC:2.1.2.11];K15015//solute carrier family 32 (vesicular inhibitory amino acid transporter)	gi|169786085|ref|XP_001827503.1|//amino acid transporter [Aspergillus oryzae RIB40]
AO09M000000017	1689	1.74153	50.6694	4.86268	1.24496e-14	Up	4.21405e-15	GO:0043231//intracellular membrane-bounded organelle	GO:0050136//NADH dehydrogenase (quinone) activity	GO:0022904//respiratory electron transport chain	Energy production and conversion ;	K03879//NADH-ubiquinone oxidoreductase chain 2 [EC:1.6.5.3]	gi|380702239|gb|AFD96008.1|//NADH dehydrogenase subunit 2 (mitochondrion) [Aspergillus oryzae]
AO090038000553	1595	71.1934	2065.23	4.85842	0	Up	0	GO:0031224//intrinsic component of membrane;GO:0016021//integral component of membrane	NA	GO:0006810//transport;GO:0055085//transmembrane transport	Inorganic ion transport and metabolism ;	K14640//solute carrier family 20 (sodium-dependent phosphate transporter);K15449//tRNA wybutosine-synthesizing protein 1 [EC:4.1.3.44]	gi|83774198|dbj|BAE64323.1|//unnamed protein product [Aspergillus oryzae RIB40]
AO090023000046	1089	2.59019	74.4513	4.84517	9.99925e-21	Up	2.86087e-21	NA	NA	NA	NA	K00108//choline dehydrogenase [EC:1.1.99.1];K06123//1-acylglycerone phosphate reductase [EC:1.1.1.101];K14950//cation-transporting ATPase 13A1 [EC:3.6.3.-];K14213//Xaa-Pro dipeptidase [EC:3.4.13.9]	gi|83768496|dbj|BAE58633.1|//unnamed protein product [Aspergillus oryzae RIB40]
AO090103000023	1746	229.816	6547.51	4.8324	0	Up	0	NA	GO:0008448//N-acetylglucosamine-6-phosphate deacetylase activity;GO:0016811//hydrolase activity, acting on carbon-nitrogen (but not peptide) bonds, in linear amides	GO:0006041//glucosamine metabolic process;GO:0006044//N-acetylglucosamine metabolic process;GO:0005975//carbohydrate metabolic process	Carbohydrate transport and metabolism ;	K01443//N-acetylglucosamine-6-phosphate deacetylase [EC:3.5.1.25]	gi|992077670|ref|XP_015402376.1|//N-acetylglucosamine-6-phosphate deacetylase (NagA), partial [Aspergillus nomius NRRL 13137];gi|169784364|ref|XP_001826643.1|//N-acetylglucosamine-6-phosphate deacetylase (NagA) [Aspergillus oryzae RIB40]
AO090003001089	1068	158.702	4481.38	4.81956	0	Up	0	GO:0044424//intracellular part	GO:0019203//carbohydrate phosphatase activity	GO:0005975//carbohydrate metabolic process	Carbohydrate transport and metabolism ;	K03841//fructose-1,6-bisphosphatase I [EC:3.1.3.11]	gi|169771435|ref|XP_001820187.1|//fructose-1,6-bisphosphatase [Aspergillus oryzae RIB40]
AO090020000493	1293	215.857	6040.84	4.8066	0	Up	0	NA	GO:0016627//oxidoreductase activity, acting on the CH-CH group of donors;GO:0050662//coenzyme binding	GO:0008152//metabolic process	Lipid transport and metabolism ;	K00253//isovaleryl-CoA dehydrogenase [EC:1.3.8.4]	gi|169780668|ref|XP_001824798.1|//isovaleryl-CoA dehydrogenase 2 [Aspergillus oryzae RIB40]
AO090124000011	1172	9.80789	270.796	4.78712	8.64345e-72	Up	1.24205e-72	GO:0044464//cell part;GO:0015629//actin cytoskeleton	GO:0003779//actin binding;GO:0008092//cytoskeletal protein binding	GO:0030042//actin filament depolymerization	NA	K05765//cofilin	gi|317149966|ref|XP_001823696.2|//cofilin, actophorin [Aspergillus oryzae RIB40];gi|83772434|dbj|BAE62563.1|//unnamed protein product [Aspergillus oryzae RIB40]
AO090103000156	669	1.32291	36.3075	4.77848	6.94295e-11	Up	2.68118e-11	NA	NA	NA	NA	K00108//choline dehydrogenase [EC:1.1.99.1];K14326//regulator of nonsense transcripts 1 [EC:3.6.4.-];K14213//Xaa-Pro dipeptidase [EC:3.4.13.9];K07555//ATP synthase mitochondrial F1 complex assembly factor 1	gi|238508237|ref|XP_002385317.1|//conserved hypothetical protein [Aspergillus flavus NRRL3357]
AO090023000325	1531	73.5003	2015.9	4.77753	0	Up	0	NA	NA	NA	NA	NA	gi|317145556|ref|XP_001820888.2|//hypothetical protein AOR_1_558144 [Aspergillus oryzae RIB40];gi|83768749|dbj|BAE58886.1|//unnamed protein product [Aspergillus oryzae RIB40]
AO090023000044	672	159.063	4346.72	4.77226	0	Up	0	NA	GO:0016787//hydrolase activity	NA	General function prediction only ;	K01560//2-haloacid dehalogenase [EC:3.8.1.2]	gi|169772329|ref|XP_001820633.1|//2-deoxyglucose-6-phosphate phosphatase [Aspergillus oryzae RIB40]
AO090026000396	1452	15.5598	424.663	4.77042	9.88247e-106	Up	1.10078e-106	NA	NA	GO:0006810//transport	Carbohydrate transport and metabolism ; Amino acid transport and metabolism ; Inorganic ion transport and metabolism ; General function prediction only ;	K08157//MFS transporter, DHA1 family, multidrug resistance protein	gi|169774781|ref|XP_001821858.1|//MFS multidrug transporter [Aspergillus oryzae RIB40]
AO090001000632	918	0.23824	6.48778	4.76724	0.000680943	Up	0.000374854	NA	NA	NA	General function prediction only ;	NA	gi|169769326|ref|XP_001819133.1|//endonuclease/exonuclease/phosphatase family protein [Aspergillus oryzae RIB40]
AO090003000203	1755	380.174	10348.2	4.76657	0	Up	0	NA	NA	NA	NA	NA	gi|169769897|ref|XP_001819418.1|//hypothetical protein AOR_1_334154 [Aspergillus oryzae RIB40]
AO090038000215	2130	15.3249	416.167	4.76321	1.75047e-109	Up	1.90629e-110	NA	NA	NA	Carbohydrate transport and metabolism ;	K05747//Wiskott-Aldrich syndrome protein	gi|83773910|dbj|BAE64035.1|//unnamed protein product [Aspergillus oryzae RIB40];gi|914761660|gb|KOC15475.1|//extracellular glycine-rich protein [Aspergillus flavus AF70]
AO090023000330	1083	1.23777	33.3441	4.75162	2.77255e-07	Up	1.24194e-07	NA	NA	NA	NA	NA	gi|83768753|dbj|BAE58890.1|//unnamed protein product [Aspergillus oryzae RIB40]
AO090020000366	1305	0.453113	12.1492	4.74484	2.57464e-05	Up	1.2872e-05	NA	GO:0016491//oxidoreductase activity	GO:0008152//metabolic process	NA	NA	gi|83773434|dbj|BAE63561.1|//unnamed protein product [Aspergillus oryzae RIB40]
AO090012000683	1773	2.80143	74.9264	4.74124	8.08121e-21	Up	2.30764e-21	NA	GO:0008238//exopeptidase activity	GO:0019538//protein metabolic process	General function prediction only ;	K06978//uncharacterized protein	gi|169763512|ref|XP_001727656.1|//hypothetical protein AOR_1_1182194 [Aspergillus oryzae RIB40]
AO090005000941	672	33.418	885.272	4.72742	3.89088e-210	Up	2.75797e-211	NA	NA	NA	Transcription ; General function prediction only ;	K15361//WD repeat-containing protein 48;K10437//phenylacetate 2-hydroxylase [EC:1.14.13.-]	gi|169766946|ref|XP_001817944.1|//GNAT family acetyltransferase [Aspergillus oryzae RIB40]
AO090005000962	1590	8.10139	213.898	4.72261	1.94393e-57	Up	3.18173e-58	GO:0031224//intrinsic component of membrane	GO:0022857//transmembrane transporter activity	GO:0071702//organic substance transport	Carbohydrate transport and metabolism ; Amino acid transport and metabolism ; Inorganic ion transport and metabolism ; General function prediction only ;	K08139//MFS transporter, SP family, sugar:H+ symporter	gi|169766978|ref|XP_001817960.1|//high-affinity hexose transporter [Aspergillus oryzae RIB40]
AO090701000773	1302	4.94141	130.375	4.7216	2.35969e-34	Up	5.21987e-35	NA	NA	NA	NA	NA	gi|169778205|ref|XP_001823568.1|//hypothetical protein AOR_1_1358114 [Aspergillus oryzae RIB40]
AO090023000049	1860	2.57994	67.8081	4.71605	1.15794e-19	Up	3.4025e-20	NA	NA	GO:0006810//transport	Carbohydrate transport and metabolism ; Amino acid transport and metabolism ; Inorganic ion transport and metabolism ; General function prediction only ;	K08197//MFS transporter, SIT family, siderophore-iron:H+ symporter	gi|83768499|dbj|BAE58636.1|//unnamed protein product [Aspergillus oryzae RIB40]
AO090003000017	870	47.693	1238.33	4.69848	7.74215e-284	Up	4.24774e-285	NA	GO:0003824//catalytic activity	NA	Secondary metabolites biosynthesis, transport and catabolism ;	K01557//acylpyruvate hydrolase [EC:3.7.1.5];K17100//dihydroxyacetone synthase [EC:2.2.1.3];K03142//transcription initiation factor TFIIH subunit 2	gi|169769579|ref|XP_001819259.1|//Fumarylacetoacetate hydrolase domain-containing protein 2 [Aspergillus oryzae RIB40]
AO090011000501	4372	715.733	18570.9	4.69748	0	Up	0	GO:0043231//intracellular membrane-bounded organelle;GO:0005634//nucleus	GO:0003677//DNA binding;GO:0000981//RNA polymerase II transcription factor activity, sequence-specific DNA binding;GO:0046914//transition metal ion binding;GO:0008270//zinc ion binding;GO:0003676//nucleic acid binding	GO:0006357//regulation of transcription from RNA polymerase II promoter	NA	K03940//NADH dehydrogenase (ubiquinone) Fe-S protein 7 [EC:1.6.5.3 1.6.99.3];K00102//D-lactate dehydrogenase (cytochrome) [EC:1.1.2.4];K09244//transcriptional regulatory protein AMDR	gi|83774872|dbj|BAE64995.1|//unnamed protein product [Aspergillus oryzae RIB40];gi|914757573|gb|KOC11651.1|//fungal specific transcription factor domain protein [Aspergillus flavus AF70]
AO090003000047	1260	16.8208	434.363	4.69058	8.68148e-05	Up	4.48099e-05	NA	GO:0003824//catalytic activity	NA	Posttranslational modification, protein turnover, chaperones ;	K11713//geranylgeranyl transferase type-1 subunit beta [EC:2.5.1.59]	gi|391863501|gb|EIT72809.1|//protein geranylgeranyltransferase Type I, beta subunit [Aspergillus oryzae 3.042]
AO090010000010	2211	5.13038	131.947	4.68475	1.92005e-36	Up	4.10771e-37	NA	NA	NA	NA	K10981//DNA polymerase IV [EC:2.7.7.7]	gi|83775811|dbj|BAE65930.1|//unnamed protein product [Aspergillus oryzae RIB40]
AO090005000799	3459	0.672054	17.2587	4.6826	1.88704e-06	Up	8.82113e-07	GO:0031224//intrinsic component of membrane	GO:0046873//metal ion transmembrane transporter activity;GO:0032559//adenyl ribonucleotide binding;GO:0019829//cation-transporting ATPase activity	GO:0009206//purine ribonucleoside triphosphate biosynthetic process;GO:0006816//calcium ion transport	Inorganic ion transport and metabolism ;	K01537//Ca2+-transporting ATPase [EC:3.6.3.8]	gi|83765673|dbj|BAE55816.1|//unnamed protein product [Aspergillus oryzae RIB40]
AO090005000546	1047	1.31446	33.7517	4.68241	1.56961e-10	Up	6.14088e-11	NA	GO:0046914//transition metal ion binding;GO:0003824//catalytic activity	GO:0008152//metabolic process	Energy production and conversion ; General function prediction only ;	K15385//aspyridone synthetase trans-acting enoyl reductase	gi|169766250|ref|XP_001817596.1|//protein TOXD [Aspergillus oryzae RIB40]
AO090005001319	1346	2.16501	55.5701	4.68186	3.79619e-16	Up	1.2329e-16	NA	GO:0016787//hydrolase activity;GO:0003824//catalytic activity	GO:0008152//metabolic process	Lipid transport and metabolism ;	K17648//versiconal hemiacetal acetate esterase [EC:3.1.1.94]	gi|914763738|gb|KOC17547.1|//lipase/esterase [Aspergillus flavus AF70];gi|317140547|ref|XP_001818253.2|//lipase/esterase [Aspergillus oryzae RIB40]
AO090009000195	1557	307.167	7806.08	4.6675	0	Up	0	NA	GO:0016782//transferase activity, transferring sulfur-containing groups	GO:0044248//cellular catabolic process	Lipid transport and metabolism ;	K01027//3-oxoacid CoA-transferase [EC:2.8.3.5]	gi|169764439|ref|XP_001816691.1|//succinyl-CoA:3-ketoacid-coenzyme A transferase 1 [Aspergillus oryzae RIB40]
AO090010000586	1890	33.824	852.607	4.65576	4.66269e-217	Up	3.21491e-218	NA	GO:0016614//oxidoreductase activity, acting on CH-OH group of donors;GO:0050660//flavin adenine dinucleotide binding;GO:0003824//catalytic activity;GO:0050662//coenzyme binding	GO:0008152//metabolic process;GO:0055114//oxidation-reduction process	Energy production and conversion ;	K15454//tRNA pseudouridine synthase 9 [EC:5.4.99.-];K04487//cysteine desulfurase [EC:2.8.1.7]	gi|317145964|ref|XP_001821198.2|//FAD-dependent oxygenase [Aspergillus oryzae RIB40] ;gi|83776302|dbj|BAE66421.1|//unnamed protein product [Aspergillus oryzae RIB40]
AO090206000053	960	183.904	4631.2	4.65436	0	Up	0	NA	GO:0016616//oxidoreductase activity, acting on the CH-OH group of donors, NAD or NADP as acceptor;GO:0051287//NAD binding	GO:0032787//monocarboxylic acid metabolic process	Lipid transport and metabolism ;	K00074//3-hydroxybutyryl-CoA dehydrogenase [EC:1.1.1.157]	gi|169784193|ref|XP_001826558.1|//3-hydroxybutyryl-CoA dehydrogenase [Aspergillus oryzae RIB40]
AO090701000470	1032	6.62325	166.682	4.65342	2.62034e-45	Up	4.89187e-46	NA	NA	NA	NA	NA	gi|169777695|ref|XP_001823313.1|//integral membrane protein [Aspergillus oryzae RIB40]
AO090103000193	780	0.453438	11.1537	4.62048	5.63918e-05	Up	2.87955e-05	NA	GO:0016829//lyase activity	GO:0044237//cellular metabolic process	Carbohydrate transport and metabolism ;	K02510//4-hydroxy-2-oxoheptanedioate aldolase [EC:4.1.2.52]	gi|391864233|gb|EIT73529.1|//2,4-dihydroxyhept-2-ene-1,7-dioic acid aldolase [Aspergillus oryzae 3.042]
AO090003000250	879	14.2738	349.718	4.61475	1.14292e-91	Up	1.39091e-92	NA	GO:0003824//catalytic activity	NA	General function prediction only ;	K08726//soluble epoxide hydrolase / lipid-phosphate phosphatase [EC:3.3.2.10 3.1.3.76];K01563//haloalkane dehalogenase [EC:3.8.1.5]	gi|169769981|ref|XP_001819460.1|//hydrolase [Aspergillus oryzae RIB40]
AO090005000488	2266	9.16734	223.853	4.6099	3.43553e-58	Up	5.56933e-59	GO:0043231//intracellular membrane-bounded organelle	GO:0046914//transition metal ion binding;GO:0001071//nucleic acid binding transcription factor activity;GO:0003676//nucleic acid binding	GO:0006351//transcription, DNA-templated	NA	K09241//transcriptional regulatory protein GAL4;K09245//transcriptional activator protein UGA3	gi|317139497|ref|XP_001817547.2|//C6 transcription factor Prf [Aspergillus oryzae RIB40];gi|83765402|dbj|BAE55545.1|//unnamed protein product [Aspergillus oryzae RIB40]
AO090009000591	6019	366.404	8877.29	4.59861	0	Up	0	GO:0031224//intrinsic component of membrane;GO:0016021//integral component of membrane	GO:0042625//ATPase coupled ion transmembrane transporter activity;GO:0046872//metal ion binding;GO:0005524//ATP binding;GO:0032559//adenyl ribonucleotide binding;GO:0019829//cation-transporting ATPase activity	GO:0009206//purine ribonucleoside triphosphate biosynthetic process;GO:0098655//cation transmembrane transport;GO:0006811//ion transport	Inorganic ion transport and metabolism ;	K01537//Ca2+-transporting ATPase [EC:3.6.3.8];K01536//Na+-exporting ATPase [EC:3.6.3.7]	gi|238503602|ref|XP_002383034.1|//sodium P-type ATPase, putative [Aspergillus flavus NRRL3357];gi|83764878|dbj|BAE55022.1|//unnamed protein product [Aspergillus oryzae RIB40]
AO090026000461	990	65.2945	1572.65	4.59009	0	Up	0	NA	NA	NA	NA	NA	gi|169774885|ref|XP_001821910.1|//hypothetical protein AOR_1_848014 [Aspergillus oryzae RIB40]
AO090701000251	1377	35.2871	842.769	4.57792	3.21202e-213	Up	2.25016e-214	NA	GO:0003824//catalytic activity	NA	Amino acid transport and metabolism ;	NA	gi|83771857|dbj|BAE61987.1|//unnamed protein product [Aspergillus oryzae RIB40]
AO090012000328	4446	7.25644	172.693	4.5728	1.25065e-46	Up	2.29798e-47	GO:0031224//intrinsic component of membrane	GO:0015405//P-P-bond-hydrolysis-driven transmembrane transporter activity;GO:0032559//adenyl ribonucleotide binding;GO:0017111//nucleoside-triphosphatase activity	GO:0051234//establishment of localization;GO:0009207//purine ribonucleoside triphosphate catabolic process	Defense mechanisms ;	K08711//ATP-binding cassette, subfamily G (WHITE), member 2, PDR	gi|169762926|ref|XP_001727363.1|//multidrug resistance protein CDR1 [Aspergillus oryzae RIB40]
AO090023000869	531	9.58713	225.499	4.55588	5.03966e-59	Up	8.07237e-60	NA	NA	NA	Translation, ribosomal structure and biogenesis ;	K17361//acyl-coenzyme A thioesterase 9 [EC:3.1.2.-]	gi|914754689|gb|KOC08854.1|//hypothetical protein AFLA70_410g000851 [Aspergillus flavus AF70]
AO090120000106	1593	511.485	12000	4.5522	0	Up	0	GO:0016021//integral component of membrane	GO:0016705//oxidoreductase activity, acting on paired donors, with incorporation or reduction of molecular oxygen;GO:0020037//heme binding;GO:0005506//iron ion binding;GO:0004497//monooxygenase activity;GO:0016491//oxidoreductase activity	GO:0008152//metabolic process;GO:0055114//oxidation-reduction process	Secondary metabolites biosynthesis, transport and catabolism ;	K17475//tryprostatin B 6-hydroxylase [EC:1.14.13.176];K00668//fatty acid synthase subunit beta, fungi type [EC:2.3.1.86];K00844//hexokinase [EC:2.7.1.1];K07824//benzoate 4-monooxygenase [EC:1.14.13.12]	gi|169778801|ref|XP_001823865.1|//cytochrome P450 monooxygenase [Aspergillus oryzae RIB40]
AO090003001320	465	1089.73	25444.9	4.54534	0	Up	0	NA	NA	NA	Posttranslational modification, protein turnover, chaperones ;	NA	gi|169771827|ref|XP_001820383.1|//BYS1 domain protein [Aspergillus oryzae RIB40]
AO090026000267	339	499.179	11557.9	4.53318	0	Up	0	GO:0043231//intracellular membrane-bounded organelle;GO:0044425//membrane part	GO:0005506//iron ion binding	GO:0006091//generation of precursor metabolites and energy;GO:0051234//establishment of localization	Energy production and conversion ;	K08738//cytochrome c	gi|169774565|ref|XP_001821750.1|//cytochrome c [Aspergillus oryzae RIB40]
AO090026000085	2205	6.1977	142.637	4.52447	8.77695e-39	Up	1.80823e-39	NA	GO:0016741//transferase activity, transferring one-carbon groups	GO:0006730//one-carbon metabolic process	Function unknown ;	K00545//catechol O-methyltransferase [EC:2.1.1.6]	gi|83769447|dbj|BAE59582.1|//unnamed protein product [Aspergillus oryzae RIB40]
AO090003000179	558	0.255707	5.87989	4.52323	0.00170646	Up	0.000970518	NA	NA	NA	NA	K00565//mRNA (guanine-N7-)-methyltransferase [EC:2.1.1.56]	gi|83767259|dbj|BAE57398.1|//unnamed protein product [Aspergillus oryzae RIB40]
BGI_novel_G000083	743	1.09262	25.0966	4.52163	1.29206e-08	Up	5.45705e-09	NA	NA	NA	NA	NA	gi|914763305|gb|KOC17117.1|//hypothetical protein AFLA70_253g001671 [Aspergillus flavus AF70]
AO090009000139	1472	303.504	6955.14	4.51829	0	Up	0	NA	GO:0004488//methylenetetrahydrofolate dehydrogenase (NADP+) activity	GO:0055114//oxidation-reduction process;GO:0009396//folic acid-containing compound biosynthetic process	Coenzyme transport and metabolism ;	K00295//methylenetetrahydrofolate dehydrogenase (NAD+) [EC:1.5.1.15]	gi|317138062|ref|XP_001816646.2|//methylenetetrahydrofolate dehydrogenase [Aspergillus oryzae RIB40] ;gi|83764500|dbj|BAE54644.1|//unnamed protein product [Aspergillus oryzae RIB40]
AO090138000033	2826	106.434	2431.06	4.51355	0	Up	0	GO:0016021//integral component of membrane	GO:0016740//transferase activity	NA	Cell wall/membrane/envelope biogenesis ;	NA	gi|317156167|ref|XP_001825549.2|//glycosyl transferase [Aspergillus oryzae RIB40];gi|83774292|dbj|BAE64416.1|//unnamed protein product [Aspergillus oryzae RIB40]
AO090026000060	552	0.663666	14.735	4.47265	6.84552e-06	Up	3.28885e-06	NA	NA	NA	NA	K00706//1,3-beta-glucan synthase [EC:2.4.1.34];K00688//glycogen phosphorylase [EC:2.4.1.1];K01930//folylpolyglutamate synthase [EC:6.3.2.17];K01183//chitinase [EC:3.2.1.14]	gi|83769422|dbj|BAE59557.1|//unnamed protein product [Aspergillus oryzae RIB40]
AO09M000000011	450	2.59031	57.4917	4.47216	1.33838e-16	Up	4.30232e-17	GO:0031224//intrinsic component of membrane;GO:0043231//intracellular membrane-bounded organelle;GO:0019866//organelle inner membrane	GO:0005506//iron ion binding;GO:0015002//heme-copper terminal oxidase activity	GO:0045333//cellular respiration;GO:0051234//establishment of localization	Energy production and conversion ;	K02256//cytochrome c oxidase subunit 1 [EC:1.9.3.1]	gi|380702275|gb|AFD96042.1|//cytochrome oxidase subunit 1, partial (mitochondrion) [Aspergillus flavus]
AO090010000414	3073	174.398	3849.13	4.46408	0	Up	0	NA	NA	NA	Energy production and conversion ;	K00139//succinate-semialdehyde dehydrogenase [EC:1.2.1.24];K00135//succinate-semialdehyde dehydrogenase / glutarate-semialdehyde dehydrogenase [EC:1.2.1.16 1.2.1.79 1.2.1.20]	gi|317158932|ref|XP_001827413.2|//F-box domain protein [Aspergillus oryzae RIB40];gi|83776161|dbj|BAE66280.1|//unnamed protein product [Aspergillus oryzae RIB40]
AO090010000096	1386	21.9243	481.833	4.45793	3.44207e-125	Up	3.43796e-126	NA	GO:0003824//catalytic activity	NA	Carbohydrate transport and metabolism ;	K08257//mannan endo-1,6-alpha-mannosidase [EC:3.2.1.101]	gi|169785359|ref|XP_001827140.1|//endo mannanase, GH76 family [Aspergillus oryzae RIB40]
AO090206000065	933	233.192	5116.27	4.4555	0	Up	0	NA	GO:0046914//transition metal ion binding	NA	General function prediction only ;	K14688//solute carrier family 30 (zinc transporter), member 1;K07059//uncharacterized protein	gi|169784211|ref|XP_001826567.1|//AN1 zinc finger protein [Aspergillus oryzae RIB40]
AO090005001280	603	147.148	3215.13	4.44953	0	Up	0	NA	NA	NA	Posttranslational modification, protein turnover, chaperones ;	NA	gi|83766075|dbj|BAE56218.1|//unnamed protein product [Aspergillus oryzae RIB40]
AO090038000578	1494	186.736	4075	4.44773	0	Up	0	NA	GO:0016701//oxidoreductase activity, acting on single donors with incorporation of molecular oxygen;GO:0005506//iron ion binding	GO:0008152//metabolic process	Transcription ;	K00463//indoleamine 2,3-dioxygenase [EC:1.13.11.52]	gi|169782030|ref|XP_001825478.1|//indoleamine 2,3-dioxygenase family protein [Aspergillus oryzae RIB40]
AO090103000431	1023	0.674895	14.7075	4.44574	9.74093e-06	Up	4.72744e-06	GO:0044424//intracellular part	GO:0016616//oxidoreductase activity, acting on the CH-OH group of donors, NAD or NADP as acceptor;GO:0016838//carbon-oxygen lyase activity, acting on phosphates	GO:0008652//cellular amino acid biosynthetic process	Amino acid transport and metabolism ;	K09484//quinate dehydrogenase [EC:1.1.1.24]	gi|169785064|ref|XP_001826993.1|//quinate dehydrogenase [Aspergillus oryzae RIB40]
AO090005000139	1535	36.5632	795.763	4.44387	2.13782e-203	Up	1.54486e-204	NA	GO:0004674//protein serine/threonine kinase activity;GO:0005524//ATP binding;GO:0032559//adenyl ribonucleotide binding;GO:0004672//protein kinase activity	GO:0006464//cellular protein modification process;GO:0006468//protein phosphorylation	General function prediction only ; Signal transduction mechanisms ; Transcription ; Replication, recombination and repair ;	K00924;K08286//protein-serine/threonine kinase [EC:2.7.11.-]	gi|317139070|ref|XP_001817252.2|//serine/threonine protein kinase [Aspergillus oryzae RIB40];gi|83765107|dbj|BAE55250.1|//unnamed protein product [Aspergillus oryzae RIB40]
AO090102000073	1679	4.29882	93.3284	4.4403	4.26846e-25	Up	1.10493e-25	GO:0016021//integral component of membrane	NA	GO:0006810//transport;GO:0055085//transmembrane transport	Carbohydrate transport and metabolism ; Amino acid transport and metabolism ; Inorganic ion transport and metabolism ; General function prediction only ;	K17866//diphthamide biosynthesis protein 2;K00276//primary-amine oxidase [EC:1.4.3.21];K02835//peptide chain release factor 1;K11231//osomolarity two-component system, sensor histidine kinase SLN1 [EC:2.7.13.3];K01533//Cu2+-exporting ATPase [EC:3.6.3.4]	gi|83771051|dbj|BAE61183.1|//unnamed protein product [Aspergillus oryzae RIB40]
AO090001000359	1656	9.16937	197.242	4.427	9.45352e-51	Up	1.65434e-51	NA	NA	NA	Secondary metabolites biosynthesis, transport and catabolism ;	K17842//torulene dioxygenase [EC:1.13.11.59]	gi|169768836|ref|XP_001818888.1|//dioxygenase [Aspergillus oryzae RIB40]
AO090038000218	1182	2.79814	60.0722	4.42416	6.24459e-17	Up	1.98668e-17	NA	GO:0016616//oxidoreductase activity, acting on the CH-OH group of donors, NAD or NADP as acceptor;GO:0048037//cofactor binding	GO:0006732//coenzyme metabolic process	Lipid transport and metabolism ;	K00021//hydroxymethylglutaryl-CoA reductase (NADPH) [EC:1.1.1.34]	gi|169781412|ref|XP_001825169.1|//hmg-CoA reductase [Aspergillus oryzae RIB40]
AO090038000086	7692	0.882927	18.8818	4.41856	7.88556e-07	Up	3.61576e-07	NA	GO:0003824//catalytic activity;GO:0005488//binding	GO:0008152//metabolic process	Secondary metabolites biosynthesis, transport and catabolism ;	K15384//aspyridone synthetase, hybrid polyketide synthase / nonribosomal peptide synthetase;K15419//emericellamide biosynthesis, highly reducing iterative type I polyketide synthase	gi|83773807|dbj|BAE63932.1|//unnamed protein product [Aspergillus oryzae RIB40]
AO090701000501	441	0.232332	4.93767	4.40957	0.00228584	Up	0.00131347	NA	NA	NA	NA	NA	gi|83772074|dbj|BAE62204.1|//unnamed protein product [Aspergillus oryzae RIB40]
AO090005000221	1662	0.454212	9.59305	4.40055	0.000181304	Up	9.56008e-05	NA	NA	NA	Carbohydrate transport and metabolism ; Amino acid transport and metabolism ; Inorganic ion transport and metabolism ; General function prediction only ;	K01952//phosphoribosylformylglycinamidine synthase [EC:6.3.5.3];K13095//splicing factor 1;K10866//DNA repair protein RAD50 [EC:3.6.-.-];K14708//solute carrier family 26 (sodium-independent sulfate anion transporter), member 11	gi|169765688|ref|XP_001817315.1|//efflux pump antibiotic resistance protein [Aspergillus oryzae RIB40]
AO090003000758	1989	900.316	18969.9	4.39714	0	Up	0	GO:0043231//intracellular membrane-bounded organelle	GO:0046914//transition metal ion binding;GO:0003676//nucleic acid binding	NA	General function prediction only ;	K19849//signaling mucin MSB2;K20828//zinc finger protein 143/76;K09202//regulatory protein SWI5	gi|914757281|gb|KOC11393.1|//pH-response transcription factor pacC/RIM101 [Aspergillus flavus AF70]
AO090023000141	1200	243.4	5121.17	4.39507	0	Up	0	NA	GO:0003824//catalytic activity	NA	General function prediction only ;	K01069//hydroxyacylglutathione hydrolase [EC:3.1.2.6]	gi|169772505|ref|XP_001820721.1|//metallo-beta-lactamase domain protein [Aspergillus oryzae RIB40]
AO090005000226	1689	5.13742	107.644	4.38908	4.64861e-29	Up	1.11947e-29	NA	NA	GO:0006810//transport	Carbohydrate transport and metabolism ; Amino acid transport and metabolism ; Inorganic ion transport and metabolism ; General function prediction only ;	K08165//MFS transporter, DHA2 family, multidrug resistance protein	gi|83765174|dbj|BAE55317.1|//unnamed protein product [Aspergillus oryzae RIB40]
AO090701000322	3985	112.604	2358.85	4.38876	0	Up	0	NA	GO:0016491//oxidoreductase activity	GO:0008152//metabolic process	Coenzyme transport and metabolism ; Energy production and conversion ;	K19849//signaling mucin MSB2;K00480//salicylate hydroxylase [EC:1.14.13.1];K19851//flocculation protein FLO11	gi|34809533|gb|AAQ82687.1|//Epa5p [Candida glabrata];gi|238494572|ref|XP_002378522.1|//salicylate hydroxylase [Aspergillus flavus NRRL3357]
AO090023000761	1890	178.906	3747.58	4.38868	0.00424104	Up	0.0024959	NA	NA	NA	NA	NA	gi|121802772|sp|Q2UGP9.1|RTC5_ASPOR//RecName: Full=Restriction of telomere capping protein 5
AO090012000714	1038	144.312	2997.98	4.37673	0	Up	0	NA	NA	NA	Cell cycle control, cell division, chromosome partitioning ;	K03549//KUP system potassium uptake protein	gi|169763566|ref|XP_001727683.1|//zinc metalloproteinase [Aspergillus oryzae RIB40]
AO090005000345	756	4.06927	84.4245	4.37482	1.40774e-23	Up	3.78533e-24	NA	GO:0003824//catalytic activity	NA	Secondary metabolites biosynthesis, transport and catabolism ;	K10771//AP endonuclease 1 [EC:4.2.99.18];K12479//vacuolar protein sorting-associated protein 45	gi|169765898|ref|XP_001817420.1|//dienelactone hydrolase family protein [Aspergillus oryzae RIB40]
AO090701000503	1863	20.4416	423.165	4.37164	1.66443e-107	Up	1.83098e-108	NA	NA	NA	NA	NA	gi|169777745|ref|XP_001823338.1|//hypothetical protein AOR_1_914114 [Aspergillus oryzae RIB40]
AO090005000311	1809	43.6271	902.238	4.37021	5.99677e-220	Up	4.10163e-221	NA	GO:0003824//catalytic activity;GO:0050662//coenzyme binding	GO:0008152//metabolic process	Energy production and conversion ;	K01501//nitrilase [EC:3.5.5.1]	gi|83765247|dbj|BAE55390.1|//unnamed protein product [Aspergillus oryzae RIB40]
AO090003000098	441	78.591	1624.23	4.36925	0	Up	0	NA	NA	NA	NA	NA	gi|169769723|ref|XP_001819331.1|//hypothetical protein AOR_1_172154 [Aspergillus oryzae RIB40]
AO090005000214	813	0.23723	4.88522	4.36406	0.00268527	Up	0.00155337	NA	NA	NA	Lipid transport and metabolism ; Secondary metabolites biosynthesis, transport and catabolism ; General function prediction only ;	K00059//3-oxoacyl-[acyl-carrier protein] reductase [EC:1.1.1.100];K03448//MFS transporter, ACS family, pantothenate transporter	gi|83765163|dbj|BAE55306.1|//unnamed protein product [Aspergillus oryzae RIB40]
AO090011000108	549	69.6887	1427.25	4.35617	0	Up	0	NA	NA	NA	NA	NA	gi|169782664|ref|XP_001825794.1|//hypothetical protein AOR_1_192054 [Aspergillus oryzae RIB40]
AO090011000566	666	1.10305	22.4496	4.34712	1.47149e-07	Up	6.4912e-08	NA	NA	NA	Nucleotide transport and metabolism ;	K01951//GMP synthase (glutamine-hydrolysing) [EC:6.3.5.2];K20457//dihydrofolate synthase [EC:6.3.2.12]	gi|83774925|dbj|BAE65048.1|//unnamed protein product [Aspergillus oryzae RIB40]
AO090009000344	795	0.467895	9.4737	4.33967	0.000299773	Up	0.000160745	NA	NA	NA	NA	NA	gi|83764674|dbj|BAE54818.1|//unnamed protein product [Aspergillus oryzae RIB40]
AO090012000680	1860	70.599	1427.66	4.33786	0	Up	0	NA	GO:0016298//lipase activity	GO:0006644//phospholipid metabolic process	NA	K13333//lysophospholipase [EC:3.1.1.5]	gi|169763506|ref|XP_001727653.1|//lysophospholipase 1 [Aspergillus oryzae RIB40]
AO090003001007	1215	98.1531	1984.76	4.33779	0	Up	0	NA	GO:0000166//nucleotide binding;GO:0003824//catalytic activity	GO:0008152//metabolic process	Energy production and conversion ;	K11517//(S)-2-hydroxy-acid oxidase [EC:1.1.3.15];K00467//lactate 2-monooxygenase [EC:1.13.12.4]	gi|83767976|dbj|BAE58115.1|//unnamed protein product [Aspergillus oryzae RIB40]
AO090103000122	1522	3.0121	60.6245	4.33106	1.3595e-17	Up	4.23632e-18	GO:0005576//extracellular region	NA	NA	NA	NA	gi|317158008|ref|XP_001826726.2|//hypothetical protein AOR_1_216034 [Aspergillus oryzae RIB40];gi|83775473|dbj|BAE65593.1|//unnamed protein product [Aspergillus oryzae RIB40]
AO090005000556	846	12.1448	243.043	4.3228	9.55543e-65	Up	1.45931e-65	GO:0044421//extracellular region part	GO:0004175//endopeptidase activity;GO:0046914//transition metal ion binding	GO:0019538//protein metabolic process	NA	NA	gi|83765460|dbj|BAE55603.1|//unnamed protein product [Aspergillus oryzae RIB40]
AO090003000256	1844	18.1014	360.698	4.31662	2.4112e-88	Up	3.01428e-89	GO:0016021//integral component of membrane	NA	NA	NA	NA	gi|83767324|dbj|BAE57463.1|//unnamed protein product [Aspergillus oryzae RIB40];gi|238487670|ref|XP_002375073.1|//conserved hypothetical protein [Aspergillus flavus NRRL3357]
AO090003000309	1812	154.232	3053.6	4.30734	0	Up	0	NA	GO:0016491//oxidoreductase activity	NA	Amino acid transport and metabolism ;	K17066//alcohol oxidase [EC:1.1.3.13]	gi|391864136|gb|EIT73434.1|//choline dehydrogenase [Aspergillus oryzae 3.042]
AO090038000463	1182	531.381	10499.2	4.30439	0	Up	0	NA	NA	NA	Translation, ribosomal structure and biogenesis ;	K03263//translation initiation factor 5A	gi|83774124|dbj|BAE64249.1|//unnamed protein product [Aspergillus oryzae RIB40];gi|317156107|ref|XP_001825383.2|//hypothetical protein AOR_1_1188074 [Aspergillus oryzae RIB40]
AO090102000087	1500	73.1036	1434.86	4.29482	0	Up	0	NA	GO:0004497//monooxygenase activity;GO:0016491//oxidoreductase activity;GO:0071949//FAD binding	GO:0008152//metabolic process;GO:0055114//oxidation-reduction process	Coenzyme transport and metabolism ; Energy production and conversion ;	K00480//salicylate hydroxylase [EC:1.14.13.1]	gi|83771065|dbj|BAE61197.1|//unnamed protein product [Aspergillus oryzae RIB40]
AO090023000604	669	29.976	588.033	4.29402	3.09217e-148	Up	2.74973e-149	NA	NA	NA	NA	NA	gi|83768995|dbj|BAE59132.1|//unnamed protein product [Aspergillus oryzae RIB40]
AO090020000492	1743	243.553	4755.67	4.28734	0	Up	0	NA	GO:0003824//catalytic activity	NA	Lipid transport and metabolism ;	K01969//3-methylcrotonyl-CoA carboxylase beta subunit [EC:6.4.1.4]	gi|169780666|ref|XP_001824797.1|//methylcrotonoyl-CoA carboxylase beta chain [Aspergillus oryzae RIB40]
AO090206r00001	1799	106380	2.05859e+06	4.27436	5.57305e-93	Up	6.74122e-94	NA	NA	NA	NA	NA	gi|350632771|gb|EHA21138.1|//hypothetical protein ASPNIDRAFT_191424 [Aspergillus niger ATCC 1015]
AO090102000331	1788	0.229974	4.43542	4.26953	0.00351213	Up	0.00205012	NA	GO:0016798//hydrolase activity, acting on glycosyl bonds	GO:0044238//primary metabolic process	Carbohydrate transport and metabolism ;	K01198//xylan 1,4-beta-xylosidase [EC:3.2.1.37]	gi|83771261|dbj|BAE61393.1|//unnamed protein product [Aspergillus oryzae RIB40]
AO090701000472	1110	73.0982	1406.42	4.26605	0	Up	0	NA	GO:0003824//catalytic activity	GO:0008152//metabolic process	General function prediction only ;	K01069//hydroxyacylglutathione hydrolase [EC:3.1.2.6]	gi|169777699|ref|XP_001823315.1|//oxidoreductase, 2OG-Fe(II) oxygenase family [Aspergillus oryzae RIB40]
AO090011000679	1631	1286.33	24511.5	4.25213	0	Up	0	NA	GO:0016769//transferase activity, transferring nitrogenous groups;GO:0008483//transaminase activity;GO:0048037//cofactor binding;GO:0030170//pyridoxal phosphate binding	GO:0019752//carboxylic acid metabolic process;GO:0009058//biosynthetic process;GO:0006520//cellular amino acid metabolic process	Amino acid transport and metabolism ;	K14454//aspartate aminotransferase, cytoplasmic [EC:2.6.1.1]	gi|350633746|gb|EHA22111.1|//hypothetical protein ASPNIDRAFT_56390 [Aspergillus niger ATCC 1015];gi|169783622|ref|XP_001826273.1|//aspartate aminotransferase, cytoplasmic [Aspergillus oryzae RIB40]
AO090206r00003	3364	584590	1.11255e+07	4.2503	1.06074e-49	Up	1.87971e-50	NA	NA	NA	NA	NA	gi|242805359|ref|XP_002484510.1|//hypothetical protein TSTA_040370 [Talaromyces stipitatus ATCC 10500]
AO090011000481	693	0.451278	8.55111	4.24402	0.000387558	Up	0.00020953	GO:0044464//cell part	GO:0046914//transition metal ion binding	NA	NA	NA	gi|83774855|dbj|BAE64978.1|//unnamed protein product [Aspergillus oryzae RIB40]
AO090023000605	675	0.452365	8.53947	4.23859	0.000404273	Up	0.000218902	NA	GO:0004175//endopeptidase activity	GO:0019538//protein metabolic process	NA	NA	gi|83768996|dbj|BAE59133.1|//unnamed protein product [Aspergillus oryzae RIB40]
AO090120000196	1500	104.765	1973.02	4.23518	0	Up	0	NA	GO:0046872//metal ion binding;GO:0016160//amylase activity	GO:0005975//carbohydrate metabolic process	Carbohydrate transport and metabolism ;	K01176//alpha-amylase [EC:3.2.1.1]	gi|169773935|ref|XP_001821436.1|//alpha-amylase A type-1/2 [Aspergillus oryzae RIB40]
AO090023000944	1500	104.765	1973.02	4.23518	0	Up	0	NA	GO:0046872//metal ion binding;GO:0016160//amylase activity	GO:0005975//carbohydrate metabolic process	Carbohydrate transport and metabolism ;	K01176//alpha-amylase [EC:3.2.1.1]	gi|169773935|ref|XP_001821436.1|//alpha-amylase A type-1/2 [Aspergillus oryzae RIB40]
AO090003000131	3684	1.30414	24.5566	4.23494	2.80659e-08	Up	1.20268e-08	NA	GO:0000166//nucleotide binding;GO:0017111//nucleoside-triphosphatase activity	GO:0006810//transport;GO:0009987//cellular process	Defense mechanisms ;	K05658//ATP-binding cassette, subfamily B (MDR/TAP), member 1 [EC:3.6.3.44]	gi|83767219|dbj|BAE57358.1|//unnamed protein product [Aspergillus oryzae RIB40]
AO090701000492	420	2.37672	44.6807	4.23261	6.51189e-13	Up	2.33488e-13	NA	NA	NA	NA	NA	gi|83772067|dbj|BAE62197.1|//unnamed protein product [Aspergillus oryzae RIB40]
AO090003000229	1338	0.258721	4.86106	4.2318	0.00422244	Up	0.00248418	NA	NA	NA	Function unknown ;	NA	gi|83767300|dbj|BAE57439.1|//unnamed protein product [Aspergillus oryzae RIB40]
AO090005001517	3209	2986.69	56060.1	4.23035	0	Up	0	GO:0005634//nucleus;GO:0044732//mitotic spindle pole body	GO:0003677//DNA binding;GO:0005524//ATP binding;GO:0032559//adenyl ribonucleotide binding;GO:0003678//DNA helicase activity;GO:0003676//nucleic acid binding;GO:0004003//ATP-dependent DNA helicase activity	GO:0034644//cellular response to UV;GO:0000725//recombinational repair;GO:0006259//DNA metabolic process;GO:0032508//DNA duplex unwinding;GO:0006301//postreplication repair	Replication, recombination and repair ;	K03657//DNA helicase II / ATP-dependent DNA helicase PcrA [EC:3.6.4.12]	gi|169767922|ref|XP_001818432.1|//ATP-dependent DNA helicase [Aspergillus oryzae RIB40]
AO090020000679	3924	0.67513	12.6709	4.23021	4.90136e-05	Up	2.49422e-05	GO:0031224//intrinsic component of membrane	GO:0015405//P-P-bond-hydrolysis-driven transmembrane transporter activity;GO:0032559//adenyl ribonucleotide binding;GO:0017111//nucleoside-triphosphatase activity	GO:0006810//transport;GO:0009207//purine ribonucleoside triphosphate catabolic process	Defense mechanisms ;	K05658//ATP-binding cassette, subfamily B (MDR/TAP), member 1 [EC:3.6.3.44]	gi|169780982|ref|XP_001824955.1|//ABC multidrug transporter Mdr1 [Aspergillus oryzae RIB40]
AO090026000404	2152	431.558	8097.26	4.22981	0	Up	0	NA	GO:0016747//transferase activity, transferring acyl groups other than amino-acyl groups	NA	NA	K00624//carnitine O-acetyltransferase [EC:2.3.1.7]	gi|83769725|dbj|BAE59860.1|//unnamed protein product [Aspergillus oryzae RIB40];gi|145254415|ref|XP_001398619.1|//carnitine acetyl transferase [Aspergillus niger CBS 513.88]
BGI_novel_G000107	2101	215.014	4031.37	4.22877	0	Up	0	NA	GO:0004556//alpha-amylase activity;GO:0005509//calcium ion binding	GO:0016052//carbohydrate catabolic process	NA	K01176//alpha-amylase [EC:3.2.1.1]	gi|992077492|ref|XP_015402287.1|//alpha-amylase A type-1/2 [Aspergillus nomius NRRL 13137]
AO090003000325	1671	7.27744	136.426	4.22854	5.07357e-34	Up	1.12886e-34	GO:0031224//intrinsic component of membrane	GO:0022857//transmembrane transporter activity	GO:0006810//transport	Carbohydrate transport and metabolism ; Amino acid transport and metabolism ; Inorganic ion transport and metabolism ; General function prediction only ;	K08139//MFS transporter, SP family, sugar:H+ symporter	gi|169770105|ref|XP_001819522.1|//MFS monosaccharide transporter [Aspergillus oryzae RIB40]
AO090103000353	1446	0.672982	12.6127	4.22817	4.26659e-05	Up	2.16099e-05	NA	GO:0016884//carbon-nitrogen ligase activity, with glutamine as amido-N-donor	GO:0006528//asparagine metabolic process	Amino acid transport and metabolism ;	K01953//asparagine synthase (glutamine-hydrolysing) [EC:6.3.5.4]	gi|83775670|dbj|BAE65790.1|//unnamed protein product [Aspergillus oryzae RIB40]
AO090138000079	2103	1.5321	28.6283	4.22386	5.64962e-09	Up	2.34868e-09	NA	GO:0016641//oxidoreductase activity, acting on the CH-NH2 group of donors, oxygen as acceptor;GO:0046914//transition metal ion binding;GO:0048037//cofactor binding	GO:0006807//nitrogen compound metabolic process	Secondary metabolites biosynthesis, transport and catabolism ;	K00276//primary-amine oxidase [EC:1.4.3.21]	gi|169782255|ref|XP_001825590.1|//peroxisomal copper amine oxidase [Aspergillus oryzae RIB40]
AO090011000734	2001	24.6739	460.995	4.22369	4.0267e-120	Up	4.13679e-121	GO:0031224//intrinsic component of membrane	GO:0046873//metal ion transmembrane transporter activity	GO:0034220//ion transmembrane transport;GO:0030001//metal ion transport	Inorganic ion transport and metabolism ;	NA	gi|83775062|dbj|BAE65185.1|//unnamed protein product [Aspergillus oryzae RIB40]
AO090103000416	771	87.9373	1623.69	4.20666	0	Up	0	NA	NA	NA	NA	NA	gi|169785034|ref|XP_001826978.1|//hypothetical protein AOR_1_682034 [Aspergillus oryzae RIB40]
AO090012000481	1218	32.1018	592.636	4.20642	2.45961e-153	Up	2.11478e-154	NA	NA	NA	NA	NA	gi|169763180|ref|XP_001727490.1|//hypothetical protein AOR_1_838194 [Aspergillus oryzae RIB40]
AO090011000723	369	0.2369	4.37039	4.20542	0.00433659	Up	0.00255453	NA	NA	NA	NA	NA	gi|83775052|dbj|BAE65175.1|//unnamed protein product [Aspergillus oryzae RIB40]
AO090103000128	2410	5.13124	94.6452	4.20515	1.43025e-25	Up	3.66154e-26	NA	GO:0016614//oxidoreductase activity, acting on CH-OH group of donors;GO:0050660//flavin adenine dinucleotide binding;GO:0050662//coenzyme binding;GO:0016491//oxidoreductase activity	GO:0055114//oxidation-reduction process;GO:0044281//small molecule metabolic process	Amino acid transport and metabolism ;	K00108//choline dehydrogenase [EC:1.1.99.1];K01908//propionyl-CoA synthetase [EC:6.2.1.17]	gi|83775478|dbj|BAE65598.1|//unnamed protein product [Aspergillus oryzae RIB40];gi|317158018|ref|XP_001826731.2|//aryl-alcohol dehydrogenase [Aspergillus oryzae RIB40]
BGI_novel_G000001	1304	1.52264	28.0733	4.20455	4.93103e-09	Up	2.04268e-09	NA	NA	NA	NA	K19849//signaling mucin MSB2;K19851//flocculation protein FLO11	gi|238481829|ref|XP_002372153.1|//conserved hypothetical protein [Aspergillus flavus NRRL3357]
AO090005000966	1074	5.56582	102.503	4.20293	4.53964e-28	Up	1.10994e-28	NA	NA	NA	Function unknown ;	NA	gi|169766986|ref|XP_001817964.1|//hypothetical protein AOR_1_1690174 [Aspergillus oryzae RIB40]
AO090003000802	2531	147.554	2687.8	4.18711	0	Up	0	NA	GO:0046914//transition metal ion binding;GO:0008270//zinc ion binding;GO:0003824//catalytic activity	NA	Nucleotide transport and metabolism ; Translation, ribosomal structure and biogenesis ;	K01485//cytosine deaminase [EC:3.5.4.1]	gi|83767797|dbj|BAE57936.1|//unnamed protein product [Aspergillus oryzae RIB40];gi|317144152|ref|XP_001819938.2|//cytosine deaminase [Aspergillus oryzae RIB40]
AO090701000831	8611	818.817	14813.5	4.17722	0	Up	0	NA	GO:0022892//substrate-specific transporter activity;GO:0031177//phosphopantetheine binding;GO:0019842//vitamin binding;GO:0003824//catalytic activity;GO:0016740//transferase activity	GO:0008152//metabolic process	Secondary metabolites biosynthesis, transport and catabolism ;	K15321//naphtho-gamma-pyrone polyketide synthase	gi|169778305|ref|XP_001823618.1|//polyketide synthase [Aspergillus oryzae RIB40]
AO090026000061	1446	2.15769	38.972	4.17488	8.72656e-12	Up	3.26714e-12	NA	NA	NA	NA	NA	gi|83769423|dbj|BAE59558.1|//unnamed protein product [Aspergillus oryzae RIB40]
AO090026000220	1406	2.38888	43.1307	4.17431	5.29981e-12	Up	1.96322e-12	NA	GO:0005488//binding	GO:0005975//carbohydrate metabolic process	NA	K19069//cellobiose dehydrogenase (acceptor) [EC:1.1.99.18];K10436//microtubule-associated protein, RP/EB family	gi|169774473|ref|XP_001821704.1|//cellobiose dehydrogenase [Aspergillus oryzae RIB40]
AO090011000561	762	0.691553	12.3351	4.15679	0.00698052	Up	0.00419551	NA	NA	NA	Coenzyme transport and metabolism ;	K00877//hydroxymethylpyrimidine/phosphomethylpyrimidine kinase / thiaminase [EC:2.7.1.49 2.7.4.7 3.5.99.2]	gi|83774920|dbj|BAE65043.1|//unnamed protein product [Aspergillus oryzae RIB40]
AO090003001326	615	80.538	1427.35	4.14752	0	Up	0	NA	NA	NA	Posttranslational modification, protein turnover, chaperones ;	NA	gi|169771839|ref|XP_001820389.1|//GPI anchored protein [Aspergillus oryzae RIB40]
BGI_novel_G000080	2622	15.3168	269.112	4.13502	4.71047e-13	Up	1.6803e-13	NA	GO:0008270//zinc ion binding;GO:0016491//oxidoreductase activity	GO:0055114//oxidation-reduction process	NA	K00002//alcohol dehydrogenase (NADP+) [EC:1.1.1.2];K06067//histone deacetylase 1/2 [EC:3.5.1.98]	gi|317136649|ref|XP_003189966.1|//alcohol dehydrogenase [Aspergillus oryzae RIB40]
AO090001000177	975	86.3166	1512.42	4.13108	0	Up	0	NA	NA	NA	NA	NA	gi|169768516|ref|XP_001818728.1|//integral membrane protein [Aspergillus oryzae RIB40]
AO090003000247	2316	17.9058	312.887	4.12715	1.2471e-78	Up	1.69564e-79	NA	GO:0000166//nucleotide binding;GO:0016628//oxidoreductase activity, acting on the CH-CH group of donors, NAD or NADP as acceptor	GO:0008152//metabolic process	Energy production and conversion ;	K00354//NADPH2 dehydrogenase [EC:1.6.99.1]	gi|83767316|dbj|BAE57455.1|//unnamed protein product [Aspergillus oryzae RIB40]
AO090011000206	3638	9.80453	171.199	4.12608	1.29601e-44	Up	2.45888e-45	NA	NA	NA	NA	NA	gi|83774622|dbj|BAE64745.1|//unnamed protein product [Aspergillus oryzae RIB40];gi|317156609|ref|XP_003190745.1|//hypothetical protein AOR_1_342054 [Aspergillus oryzae RIB40]
AO090010000153	642	65.0385	1135.46	4.12584	2.89368e-287	Up	1.5743e-288	NA	GO:0016407//acetyltransferase activity	NA	Translation, ribosomal structure and biogenesis ;	NA	gi|169785459|ref|XP_001827190.1|//N-acetyltransferase, GNAT family [Aspergillus oryzae RIB40]
AO090120000442	3471	15.3182	267.16	4.12439	1.43079e-69	Up	2.10081e-70	GO:0044464//cell part	GO:0046914//transition metal ion binding	NA	NA	NA	gi|914763717|gb|KOC17526.1|//hypothetical protein AFLA70_133g002661 [Aspergillus flavus AF70];gi|169779375|ref|XP_001824152.1|//hypothetical protein AOR_1_1290094 [Aspergillus oryzae RIB40]
AO090103000091	729	16.62	288.785	4.119	8.37079e-73	Up	1.19054e-73	NA	NA	NA	General function prediction only ;	K01104//protein-tyrosine phosphatase [EC:3.1.3.48];K01488//adenosine deaminase [EC:3.5.4.4]	gi|169784474|ref|XP_001826698.1|//hypothetical protein AOR_1_162034 [Aspergillus oryzae RIB40]
AO090103000343	1077	107.979	1875.08	4.11813	0	Up	0	NA	GO:0046914//transition metal ion binding;GO:0003824//catalytic activity	GO:0008152//metabolic process	Amino acid transport and metabolism ; General function prediction only ;	K18369//alcohol dehydrogenase [EC:1.1.1.-]	gi|169784910|ref|XP_001826916.1|//alcohol dehydrogenase [Aspergillus oryzae RIB40]
AO090020000693	873	752.156	13037	4.11544	0	Up	0	GO:0016021//integral component of membrane	NA	NA	NA	K17095//annexin A7/11	gi|83773709|dbj|BAE63836.1|//unnamed protein product [Aspergillus oryzae RIB40];gi|238504759|ref|XP_002383610.1|//conserved hypothetical protein [Aspergillus flavus NRRL3357]
AO090020000371	666	0.463313	7.98478	4.10719	0.000796342	Up	0.000440506	NA	GO:0003824//catalytic activity	NA	Amino acid transport and metabolism ;	NA	gi|83773439|dbj|BAE63566.1|//unnamed protein product [Aspergillus oryzae RIB40]
AO090026000769	360	0.889661	15.3249	4.10648	1.1729e-05	Up	5.73117e-06	NA	NA	NA	NA	NA	gi|83770038|dbj|BAE60173.1|//unnamed protein product [Aspergillus oryzae RIB40]
AO090138000036	1242	0.227396	3.91229	4.10474	0.00564667	Up	0.00336263	NA	GO:0046872//metal ion binding;GO:0051536//iron-sulfur cluster binding	GO:0008152//metabolic process	Inorganic ion transport and metabolism ; General function prediction only ;	NA	gi|169782179|ref|XP_001825552.1|//Rieske 2Fe-2S family protein [Aspergillus oryzae RIB40]
AO090011000074	1776	13.4188	230.625	4.10322	7.36822e-61	Up	1.15444e-61	NA	NA	NA	NA	K15267//mitochondrial transcription factor 1	gi|83774509|dbj|BAE64632.1|//unnamed protein product [Aspergillus oryzae RIB40];gi|238492233|ref|XP_002377353.1|//conserved hypothetical protein [Aspergillus flavus NRRL3357]
AO090113000184	705	1.09829	18.8756	4.10319	1.56805e-06	Up	7.30545e-07	GO:0044439//peroxisomal part	NA	GO:0007031//peroxisome organization	NA	K16231//fungal type III polyketide synthase;K13352//peroxin-11B	gi|169779789|ref|XP_001824359.1|//peroxin PEX11-2 [Aspergillus oryzae RIB40]
AO090023000469	738	62.2872	1069.42	4.10175	1.36866e-222	Up	9.28567e-224	NA	GO:0000166//nucleotide binding	NA	NA	NA	gi|169773089|ref|XP_001821013.1|//pyridoxamine phosphate oxidase family protein [Aspergillus oryzae RIB40]
AO090011000217	414	1.94317	33.3344	4.10053	2.24318e-10	Up	8.83189e-11	NA	NA	NA	Translation, ribosomal structure and biogenesis ;	NA	gi|83774631|dbj|BAE64754.1|//unnamed protein product [Aspergillus oryzae RIB40]
AO090009000542	918	6.6594	113.545	4.09173	1.19946e-05	Up	5.86315e-06	NA	GO:0003824//catalytic activity	NA	NA	K03927//carboxylesterase 2 [EC:3.1.1.1 3.1.1.84 3.1.1.56];K01050//cholinesterase [EC:3.1.1.8];K01049//acetylcholinesterase [EC:3.1.1.7]	gi|238503696|ref|XP_002383080.1|//carboxylesterase, putative [Aspergillus flavus NRRL3357]
AO090012000815	441	268.48	4563.1	4.08713	0	Up	0	NA	NA	NA	Translation, ribosomal structure and biogenesis ;	K14552//NET1-associated nuclear protein 1 (U3 small nucleolar RNA-associated protein 17)	gi|83770797|dbj|BAE60930.1|//unnamed protein product [Aspergillus oryzae RIB40]
AO090012000831	1451	78.8296	1338.19	4.0854	0	Up	0	GO:0016021//integral component of membrane	NA	NA	NA	NA	gi|391870233|gb|EIT79419.1|//hypothetical protein Ao3042_04209 [Aspergillus oryzae 3.042];gi|83770812|dbj|BAE60945.1|//unnamed protein product [Aspergillus oryzae RIB40]
AO090010000413	1395	2.60122	44.1544	4.0853	2.22289e-12	Up	8.13403e-13	GO:0031224//intrinsic component of membrane;GO:0016021//integral component of membrane	NA	NA	Amino acid transport and metabolism ;	K14209//solute carrier family 36 (proton-coupled amino acid transporter);K00606//3-methyl-2-oxobutanoate hydroxymethyltransferase [EC:2.1.2.11]	gi|391866337|gb|EIT75609.1|//amino acid transporter, putative [Aspergillus oryzae 3.042];gi|83776160|dbj|BAE66279.1|//unnamed protein product [Aspergillus oryzae RIB40]
AO090166000049	1599	75.4448	1277.94	4.08225	0	Up	0	GO:0043231//intracellular membrane-bounded organelle	GO:0046914//transition metal ion binding;GO:0001071//nucleic acid binding transcription factor activity;GO:0003676//nucleic acid binding;GO:0016798//hydrolase activity, acting on glycosyl bonds	GO:0006351//transcription, DNA-templated	NA	K09241//transcriptional regulatory protein GAL4;K00767//nicotinate-nucleotide pyrophosphorylase (carboxylating) [EC:2.4.2.19]	gi|83771570|dbj|BAE61701.1|//unnamed protein product [Aspergillus oryzae RIB40]
AO090102000592	1227	9.96126	168.412	4.07952	1.06386e-30	Up	2.50223e-31	NA	GO:0003824//catalytic activity	NA	Inorganic ion transport and metabolism ;	K01113//alkaline phosphatase D [EC:3.1.3.1]	gi|83771477|dbj|BAE61609.1|//unnamed protein product [Aspergillus oryzae RIB40]
AO09M000000013	408	1.54535	26.1223	4.07928	5.67842e-08	Up	2.46363e-08	GO:0044464//cell part	NA	NA	Energy production and conversion ;	K03880//NADH-ubiquinone oxidoreductase chain 3 [EC:1.6.5.3]	gi|380702235|gb|AFD96004.1|//NADH dehydrogenase subunit 3 (mitochondrion) [Aspergillus oryzae]
AO090701000907	591	0.231798	3.91183	4.07691	0.00617253	Up	0.00368507	NA	NA	NA	NA	NA	gi|83772422|dbj|BAE62552.1|//unnamed protein product [Aspergillus oryzae RIB40]
AO090012000659	456	0.231083	3.88089	4.0699	0.00629003	Up	0.00375908	NA	NA	NA	NA	NA	gi|83770664|dbj|BAE60797.1|//unnamed protein product [Aspergillus oryzae RIB40]
AO090103000459	681	1.09107	18.306	4.0685	1.49453e-06	Up	6.95192e-07	NA	NA	GO:0050896//response to stimulus	Posttranslational modification, protein turnover, chaperones ;	K13993//HSP20 family protein	gi|83775765|dbj|BAE65885.1|//unnamed protein product [Aspergillus oryzae RIB40]
AO090009000557	1620	4274.7	71513.8	4.06433	0	Up	0	NA	GO:0046912//transferase activity, transferring acyl groups, acyl groups converted into alkyl on transfer;GO:0016747//transferase activity, transferring acyl groups other than amino-acyl groups	GO:0044262//cellular carbohydrate metabolic process;GO:0009060//aerobic respiration	Energy production and conversion ;	K01638//malate synthase [EC:2.3.3.9]	gi|169765047|ref|XP_001816995.1|//malate synthase, glyoxysomal [Aspergillus oryzae RIB40]
AO090005000074	1593	637.352	10656.6	4.06351	0	Up	0	GO:0031224//intrinsic component of membrane	GO:0022857//transmembrane transporter activity	GO:0006810//transport	Carbohydrate transport and metabolism ; Amino acid transport and metabolism ; Inorganic ion transport and metabolism ; General function prediction only ;	K08139//MFS transporter, SP family, sugar:H+ symporter	gi|169765442|ref|XP_001817192.1|//glucose transporter rco-3 [Aspergillus oryzae RIB40]
AO090010000756	4368	92.2586	1536.76	4.05806	0	Up	0	GO:0031224//intrinsic component of membrane	GO:0015405//P-P-bond-hydrolysis-driven transmembrane transporter activity;GO:0032559//adenyl ribonucleotide binding;GO:0017111//nucleoside-triphosphatase activity	GO:0051234//establishment of localization;GO:0009207//purine ribonucleoside triphosphate catabolic process	Defense mechanisms ;	K08712//ATP-binding cassette, subfamily G (WHITE), member 2, SNQ2	gi|83776454|dbj|BAE66573.1|//unnamed protein product [Aspergillus oryzae RIB40]
AO090001000717	3871	1024.71	16960.7	4.0489	0	Up	0	NA	GO:0016639//oxidoreductase activity, acting on the CH-NH2 group of donors, NAD or NADP as acceptor	GO:0006103//2-oxoglutarate metabolic process	Amino acid transport and metabolism ;	K15371//glutamate dehydrogenase [EC:1.4.1.2]	gi|391863682|gb|EIT72982.1|//glutamate/leucine/phenylalanine/valine dehydrogenase [Aspergillus oryzae 3.042];gi|966761464|dbj|GAQ46135.1|//NAD-specific glutamate dehydrogenase [Aspergillus niger]
AO090138000084	405	1.11158	18.3378	4.04414	4.45741e-06	Up	2.12099e-06	NA	NA	NA	Translation, ribosomal structure and biogenesis ;	K09117//uncharacterized protein	gi|169782265|ref|XP_001825595.1|//translation initiation inhibitor [Aspergillus oryzae RIB40]
AO090701000846	1092	5.35394	88.1194	4.04079	8.27948e-23	Up	2.25603e-23	NA	GO:0046914//transition metal ion binding;GO:0003824//catalytic activity	GO:0008152//metabolic process	Energy production and conversion ; General function prediction only ;	K15385//aspyridone synthetase trans-acting enoyl reductase;K00344//NADPH2:quinone reductase [EC:1.6.5.5];K11293//protein HIRA/HIR1;K01968//3-methylcrotonyl-CoA carboxylase alpha subunit [EC:6.4.1.4]	gi|169778331|ref|XP_001823631.1|//quinone oxidoreductase [Aspergillus oryzae RIB40]
AO090103000025	1983	151.728	2496.16	4.04015	0	Up	0	GO:0016021//integral component of membrane;GO:0005737//cytoplasm	NA	GO:0006810//transport;GO:0055085//transmembrane transport	NA	NA	gi|169784366|ref|XP_001826644.1|//UNC93-like protein [Aspergillus oryzae RIB40];gi|849275589|dbj|GAO82170.1|//UNC93-like protein C922.05c [Neosartorya udagawae]
AO090102000252	1554	321.059	5242.81	4.02943	0	Up	0	NA	GO:0000166//nucleotide binding;GO:0005506//iron ion binding;GO:0003824//catalytic activity	GO:0008152//metabolic process	Energy production and conversion ;	K00101//L-lactate dehydrogenase (cytochrome) [EC:1.1.2.3]	gi|83771201|dbj|BAE61333.1|//unnamed protein product [Aspergillus oryzae RIB40]
AO090023000440	615	1.7494	28.5629	4.02921	1.35207e-08	Up	5.71919e-09	NA	NA	NA	NA	K12813//pre-mRNA-splicing factor ATP-dependent RNA helicase DHX16 [EC:3.6.4.13]	gi|169773039|ref|XP_001820988.1|//hypothetical protein AOR_1_740144 [Aspergillus oryzae RIB40]
BGI_novel_G000046	793	24.3087	394.794	4.02156	5.41615e-90	Up	6.66611e-91	NA	NA	NA	NA	NA	gi|317140135|ref|XP_003189241.1|//GNAT family acetyltransferase [Aspergillus oryzae RIB40]
AO090011000550	906	0.851827	13.7836	4.01625	0.00994794	Up	0.00607151	GO:0044464//cell part	NA	NA	Intracellular trafficking, secretion, and vesicular transport ;	K20363//protein transport protein YIP1	gi|169783410|ref|XP_001826167.1|//nuclear protein export protein Yrb2 [Aspergillus oryzae RIB40]
AO090023000688	867	1.96416	31.7234	4.01356	1.88522e-09	Up	7.71406e-10	NA	GO:0003824//catalytic activity	GO:0008152//metabolic process	Lipid transport and metabolism ; Secondary metabolites biosynthesis, transport and catabolism ; General function prediction only ;	K17742//sorbose reductase [EC:1.1.1.289];K17738//D-arabinitol 2-dehydrogenase [EC:1.1.1.250]	gi|169773475|ref|XP_001821206.1|//short-chain dehydrogenase [Aspergillus oryzae RIB40]
AO090011000356	1188	244.54	3944.43	4.01167	0	Up	0	NA	NA	NA	NA	K02920//large subunit ribosomal protein L36e;K00108//choline dehydrogenase [EC:1.1.99.1];K06123//1-acylglycerone phosphate reductase [EC:1.1.1.101]	gi|169783084|ref|XP_001826004.1|//hypothetical protein AOR_1_600054 [Aspergillus oryzae RIB40]
AO090011000171	957	0.497329	8.00579	4.00877	0.00170674	Up	0.000970971	NA	GO:0003824//catalytic activity	NA	NA	NA	gi|169782774|ref|XP_001825849.1|//alpha/beta hydrolase [Aspergillus oryzae RIB40]
AO090113000057	2088	0.463828	7.46377	4.00824	0.00122356	Up	0.000688089	NA	NA	NA	NA	K18195//rhamnogalacturonan endolyase [EC:4.2.2.23]	gi|121799651|sp|Q2U5P7.1|RGLC_ASPOR//RecName: Full=Probable rhamnogalacturonate lyase C; Flags: Precursor
AO090120000053	948	907.987	14555.6	4.00276	0	Up	0	GO:0031224//intrinsic component of membrane	NA	GO:0051234//establishment of localization	NA	K15102//solute carrier family 25 (mitochondrial phosphate transporter), member 3	gi|169778713|ref|XP_001823821.1|//phosphate carrier protein 2 [Aspergillus oryzae RIB40]
AO090166000087	2931	21.3235	339.337	3.9922	1.44834e-80	Up	1.93591e-81	GO:0031224//intrinsic component of membrane;GO:0016021//integral component of membrane	GO:0008493//tetracycline transporter activity	GO:0055085//transmembrane transport;GO:0015850//organic hydroxy compound transport;GO:0042221//response to chemical	Carbohydrate transport and metabolism ; Amino acid transport and metabolism ; Inorganic ion transport and metabolism ; General function prediction only ;	K01952//phosphoribosylformylglycinamidine synthase [EC:6.3.5.3];K16066//3-hydroxy acid dehydrogenase / malonic semialdehyde reductase [EC:1.1.1.381 1.1.1.-];K13095//splicing factor 1;K10866//DNA repair protein RAD50 [EC:3.6.-.-];K14708//solute carrier family 26 (sodium-independent sulfate anion transporter), member 11	gi|83771604|dbj|BAE61735.1|//unnamed protein product [Aspergillus oryzae RIB40];gi|992231462|ref|XP_015412220.1|//putative efflux pump antibiotic resistance protein [Aspergillus nomius NRRL 13137]
AO090138000090	4906	288.363	4571.31	3.98665	0	Up	0	GO:0042597//periplasmic space	GO:0016829//lyase activity	NA	Defense mechanisms ;	K00606//3-methyl-2-oxobutanoate hydroxymethyltransferase [EC:2.1.2.11];K07407//alpha-galactosidase [EC:3.2.1.22];K08150//MFS transporter, SP family, solute carrier family 2 (myo-inositol transporter), member 13	gi|83774344|dbj|BAE64468.1|//unnamed protein product [Aspergillus oryzae RIB40];gi|992228122|ref|XP_015410833.1|//hypothetical protein ANOM_001687 [Aspergillus nomius NRRL 13137]
AO090038000223	2448	0.248312	3.91515	3.97884	0.00828681	Up	0.00501496	NA	GO:0015926//glucosidase activity	GO:0009251//glucan catabolic process	Carbohydrate transport and metabolism ;	K05349//beta-glucosidase [EC:3.2.1.21]	gi|169781420|ref|XP_001825173.1|//beta-glucosidase G [Aspergillus oryzae RIB40]
AO090038000088	3586	149.075	2345.76	3.97594	0	Up	0	GO:0031224//intrinsic component of membrane;GO:0016021//integral component of membrane	GO:0046872//metal ion binding;GO:0016787//hydrolase activity;GO:0005524//ATP binding;GO:0032559//adenyl ribonucleotide binding;GO:0008556//potassium-transporting ATPase activity	GO:0009206//purine ribonucleoside triphosphate biosynthetic process;GO:0006811//ion transport	Inorganic ion transport and metabolism ;	K01539//sodium/potassium-transporting ATPase subunit alpha [EC:3.6.3.9]	gi|238501050|ref|XP_002381759.1|//H /K ATPase alpha subunit, putative [Aspergillus flavus NRRL3357];gi|83773808|dbj|BAE63933.1|//unnamed protein product [Aspergillus oryzae RIB40]
AO090023000169	2305	5.98096	93.7087	3.96974	5.96746e-25	Up	1.55353e-25	GO:0016021//integral component of membrane	NA	GO:0006810//transport;GO:0055085//transmembrane transport	Carbohydrate transport and metabolism ; Amino acid transport and metabolism ; Inorganic ion transport and metabolism ; General function prediction only ;	K17866//diphthamide biosynthesis protein 2;K11231//osomolarity two-component system, sensor histidine kinase SLN1 [EC:2.7.13.3];K00276//primary-amine oxidase [EC:1.4.3.21];K02835//peptide chain release factor 1;K01533//Cu2+-exporting ATPase [EC:3.6.3.4]	gi|83768608|dbj|BAE58745.1|//unnamed protein product [Aspergillus oryzae RIB40]
AO090010000652	5488	550.95	8621.81	3.968	0	Up	0	GO:0016021//integral component of membrane	NA	GO:0006810//transport;GO:0055085//transmembrane transport	Carbohydrate transport and metabolism ;	NA	gi|317159194|ref|XP_001827614.2|//MFS transporter [Aspergillus oryzae RIB40];gi|83776362|dbj|BAE66481.1|//unnamed protein product [Aspergillus oryzae RIB40]
AO090003001378	2025	220.328	3430.68	3.96077	0	Up	0	GO:0044464//cell part;GO:0016021//integral component of membrane	GO:0046873//metal ion transmembrane transporter activity;GO:0008324//cation transmembrane transporter activity	GO:0055085//transmembrane transport;GO:0006812//cation transport;GO:0030001//metal ion transport	NA	K14709//solute carrier family 39 (zinc transporter), member 1/2/3	gi|317144867|ref|XP_001820438.2|//plasma membrane zinc ion transporter [Aspergillus oryzae RIB40];gi|83768297|dbj|BAE58436.1|//unnamed protein product [Aspergillus oryzae RIB40]
AO090003001092	1305	156.977	2442.23	3.95957	0	Up	0	GO:0031224//intrinsic component of membrane;GO:0031090//organelle membrane	GO:0016757//transferase activity, transferring glycosyl groups	GO:0006497//protein lipidation	Function unknown ;	K07542//phosphatidylinositol glycan, class V [EC:2.4.1.-]	gi|110808264|sp|Q2UJS7.1|GPI18_ASPOR//RecName: Full=GPI mannosyltransferase 2; AltName: Full=GPI mannosyltransferase II; Short=GPI-MT-II; AltName: Full=Glycosylphosphatidylinositol-anchor biosynthesis protein 18
AO090012000097	3531	105.115	1634.86	3.95913	0	Up	0	GO:0031224//intrinsic component of membrane;GO:0016021//integral component of membrane	GO:0022857//transmembrane transporter activity;GO:0022891//substrate-specific transmembrane transporter activity	GO:0055085//transmembrane transport;GO:0071702//organic substance transport	Carbohydrate transport and metabolism ; Amino acid transport and metabolism ; Inorganic ion transport and metabolism ; General function prediction only ;	K00606//3-methyl-2-oxobutanoate hydroxymethyltransferase [EC:2.1.2.11];K08150//MFS transporter, SP family, solute carrier family 2 (myo-inositol transporter), member 13	gi|145249114|ref|XP_001400896.1|//MFS myo-inositol transporter [Aspergillus niger CBS 513.88] ;gi|966764717|dbj|GAQ42891.1|//MFS transporter [Aspergillus niger];gi|83770191|dbj|BAE60324.1|//unnamed protein product [Aspergillus oryzae RIB40]
AO090103000090	1914	12.5691	195.194	3.95695	2.12195e-48	Up	3.82666e-49	GO:0016021//integral component of membrane	NA	NA	NA	K00108//choline dehydrogenase [EC:1.1.99.1];K14326//regulator of nonsense transcripts 1 [EC:3.6.4.-];K19619//tyrosyl-DNA phosphodiesterase 2 [EC:3.1.4.-];K06123//1-acylglycerone phosphate reductase [EC:1.1.1.101]	gi|914753915|gb|KOC08080.1|//hypothetical protein AFLA70_14g005671 [Aspergillus flavus AF70];gi|83775444|dbj|BAE65564.1|//unnamed protein product [Aspergillus oryzae RIB40]
AO090020000392	2725	30.3898	471.755	3.95638	1.05584e-114	Up	1.11775e-115	NA	NA	NA	NA	K10380//ankyrin;K08803//death-associated protein kinase [EC:2.7.11.1]	gi|83773459|dbj|BAE63586.1|//unnamed protein product [Aspergillus oryzae RIB40];gi|169780512|ref|XP_001824720.1|//ankyrin repeat-containing protein [Aspergillus oryzae RIB40]
AO090026000465	5271	37.0203	574.391	3.95564	6.40408e-139	Up	5.91889e-140	NA	NA	NA	NA	NA	gi|914757249|gb|KOC11366.1|//hypothetical protein AFLA70_251g001150 [Aspergillus flavus AF70];gi|83769777|dbj|BAE59912.1|//unnamed protein product [Aspergillus oryzae RIB40]
AO090120000183	420	256.965	3985.11	3.95497	0	Up	0	NA	NA	NA	NA	NA	gi|83772668|dbj|BAE62796.1|//unnamed protein product [Aspergillus oryzae RIB40]
BGI_novel_G000088	1683	16.6291	257.105	3.95058	2.26516e-64	Up	3.46561e-65	NA	GO:0003964//RNA-directed DNA polymerase activity;GO:0004523//RNA-DNA hybrid ribonuclease activity;GO:0003676//nucleic acid binding	GO:0090502//RNA phosphodiester bond hydrolysis, endonucleolytic;GO:0006278//RNA-dependent DNA biosynthetic process	NA	NA	gi|242797976|ref|XP_002483073.1|//hypothetical protein TSTA_009600 [Talaromyces stipitatus ATCC 10500]
AO090003000211	1296	112.907	1741.72	3.9473	0	Up	0	NA	GO:0016823//hydrolase activity, acting on acid carbon-carbon bonds, in ketonic substances	GO:0006520//cellular amino acid metabolic process	Secondary metabolites biosynthesis, transport and catabolism ;	K01555//fumarylacetoacetase [EC:3.7.1.2]	gi|238487760|ref|XP_002375118.1|//fumarylacetoacetate hydrolase FahA [Aspergillus flavus NRRL3357]
BGI_novel_G000003	816	7.0575	108.194	3.93832	2.93192e-26	Up	7.40065e-27	NA	NA	NA	NA	NA	gi|317141553|ref|XP_003189381.1|//hypothetical protein AOR_1_226164 [Aspergillus oryzae RIB40]
AO090003001183	462	6.42269	97.5574	3.925	6.33746e-25	Up	1.65044e-25	NA	NA	NA	NA	NA	gi|83768129|dbj|BAE58268.1|//unnamed protein product [Aspergillus oryzae RIB40]
AO090010000047	1272	13.8348	210.051	3.92436	9.32012e-54	Up	1.58467e-54	NA	GO:0008168//methyltransferase activity	GO:0006730//one-carbon metabolic process	Secondary metabolites biosynthesis, transport and catabolism ; General function prediction only ;	K18280//6-hydroxytryprostatin B O-methyltransferase [EC:2.1.1.293]	gi|169785273|ref|XP_001827097.1|//O-methyltransferase [Aspergillus oryzae RIB40]
AO090023000298	3868	302.333	4589.3	3.92406	0	Up	0	GO:0044439//peroxisomal part;GO:0016021//integral component of membrane	NA	GO:0007031//peroxisome organization	NA	K00859//dephospho-CoA kinase [EC:2.7.1.24]	gi|83768725|dbj|BAE58862.1|//unnamed protein product [Aspergillus oryzae RIB40];gi|317145519|ref|XP_001820864.2|//hypothetical protein AOR_1_506144 [Aspergillus oryzae RIB40]
AO090023000168	1662	2.59885	39.4433	3.92384	2.98652e-11	Up	1.13737e-11	NA	NA	GO:0006810//transport;GO:0042221//response to chemical	Carbohydrate transport and metabolism ; Amino acid transport and metabolism ; Inorganic ion transport and metabolism ; General function prediction only ;	K01952//phosphoribosylformylglycinamidine synthase [EC:6.3.5.3];K16066//3-hydroxy acid dehydrogenase / malonic semialdehyde reductase [EC:1.1.1.381 1.1.1.-];K13095//splicing factor 1;K10866//DNA repair protein RAD50 [EC:3.6.-.-];K14708//solute carrier family 26 (sodium-independent sulfate anion transporter), member 11	gi|83768607|dbj|BAE58744.1|//unnamed protein product [Aspergillus oryzae RIB40]
AO090011000107	1029	32.5203	493.067	3.92237	8.10751e-123	Up	8.19483e-124	NA	NA	NA	General function prediction only ;	NA	gi|635505750|gb|KDE77808.1|//alpha/beta hydorlase superfamily protein [Aspergillus oryzae 100-8]
AO090103000150	987	0.842512	12.7626	3.92109	0.0122299	Up	0.00756194	NA	NA	NA	NA	NA	gi|169784576|ref|XP_001826749.1|//hypothetical protein AOR_1_264034 [Aspergillus oryzae RIB40]
AO090103000113	1119	1.10553	16.7435	3.92079	9.41743e-06	Up	4.56784e-06	NA	GO:0016701//oxidoreductase activity, acting on single donors with incorporation of molecular oxygen	GO:0008152//metabolic process	Secondary metabolites biosynthesis, transport and catabolism ;	K03119//taurine dioxygenase [EC:1.14.11.17];K19245//sulfonate dioxygenase [EC:1.14.11.-]	gi|238508338|ref|XP_002385365.1|//alpha-ketoglutarate-dependent sulfonate dioxygenase, putative [Aspergillus flavus NRRL3357]
AO090010000363	876	17.8289	269.922	3.92025	0.000786869	Up	0.000435194	NA	GO:0003677//DNA binding;GO:0005515//protein binding;GO:0001071//nucleic acid binding transcription factor activity	GO:0006351//transcription, DNA-templated	NA	NA	gi|83776121|dbj|BAE66240.1|//unnamed protein product [Aspergillus oryzae RIB40]
AO090009000545	1958	12.5765	190.012	3.91729	2.39512e-46	Up	4.40969e-47	NA	GO:0016491//oxidoreductase activity	GO:0055114//oxidation-reduction process	Amino acid transport and metabolism ;	K13366//polyamine oxidase [EC:1.5.3.14 1.5.3.16 1.5.3.-]	gi|317138541|ref|XP_001816986.2|//polyamine oxidase [Aspergillus oryzae RIB40];gi|83764840|dbj|BAE54984.1|//unnamed protein product [Aspergillus oryzae RIB40]
AO090005000256	1095	1.52631	22.9681	3.91152	2.36246e-07	Up	1.05512e-07	NA	NA	NA	NA	NA	gi|83765201|dbj|BAE55344.1|//unnamed protein product [Aspergillus oryzae RIB40]
AO090011000864	453	1.318	19.8246	3.91087	1.65516e-06	Up	7.71889e-07	NA	NA	NA	NA	NA	gi|83775180|dbj|BAE65303.1|//unnamed protein product [Aspergillus oryzae RIB40]
AO090003000786	750	0.22532	3.38866	3.91066	0.00950359	Up	0.00579069	GO:0043231//intracellular membrane-bounded organelle	GO:0046914//transition metal ion binding;GO:0001071//nucleic acid binding transcription factor activity;GO:0003676//nucleic acid binding	GO:0006351//transcription, DNA-templated	NA	K05293//phosphatidylinositol glycan, class U;K11758//chromatin structure-remodeling complex subunit RSC3/30	gi|83767785|dbj|BAE57924.1|//unnamed protein product [Aspergillus oryzae RIB40]
AO090038000195	1278	4.70334	70.4519	3.90488	3.13264e-19	Up	9.33189e-20	NA	NA	NA	NA	NA	gi|83773895|dbj|BAE64020.1|//unnamed protein product [Aspergillus oryzae RIB40]
AO090009000362	1491	409.026	6099.88	3.89852	0	Up	0	GO:0044464//cell part	NA	NA	NA	K00222//Delta14-sterol reductase [EC:1.3.1.70]	gi|169764729|ref|XP_001816836.1|//delta(14)-sterol reductase [Aspergillus oryzae RIB40]
AO090010000522	1176	45.0354	671.081	3.89736	6.68803e-166	Up	5.5472e-167	GO:0031224//intrinsic component of membrane	GO:0046914//transition metal ion binding;GO:0003824//catalytic activity	GO:0006631//fatty acid metabolic process	Lipid transport and metabolism ; Secondary metabolites biosynthesis, transport and catabolism ; General function prediction only ;	NA	gi|169786083|ref|XP_001827502.1|//integral membrane protein [Aspergillus oryzae RIB40]
AO090010000602	919	5.37651	79.8554	3.89265	6.36087e-20	Up	1.85679e-20	NA	NA	NA	NA	K20185//biogenesis of lysosome-related organelles complex 1 subunit 1	gi|317159140|ref|XP_001827570.2|//hypothetical protein AOR_1_1006024 [Aspergillus oryzae RIB40];gi|83776318|dbj|BAE66437.1|//unnamed protein product [Aspergillus oryzae RIB40]
AO090138000113	936	0.22831	3.38961	3.89205	0.010023	Up	0.00612191	NA	GO:0004175//endopeptidase activity	GO:0019538//protein metabolic process	Lipid transport and metabolism ; Secondary metabolites biosynthesis, transport and catabolism ; General function prediction only ;	K14729//multifunctional beta-oxidation protein [EC:4.2.1.- 1.1.1.-];K17652//5'-hydroxyaverantin dehydrogenase [EC:1.1.1.352]	gi|169782317|ref|XP_001825621.1|//short chain dehydrogenase/reductase family oxidoreductase [Aspergillus oryzae RIB40]
AO090010000521	1464	0.227774	3.36904	3.88666	0.0101589	Up	0.00620962	NA	NA	GO:0008152//metabolic process	Energy production and conversion ;	K00128//aldehyde dehydrogenase (NAD+) [EC:1.2.1.3];K00135//succinate-semialdehyde dehydrogenase / glutarate-semialdehyde dehydrogenase [EC:1.2.1.16 1.2.1.79 1.2.1.20]	gi|83776249|dbj|BAE66368.1|//unnamed protein product [Aspergillus oryzae RIB40]
AO090010000728	972	20.0155	295.529	3.88411	3.82965e-70	Up	5.58777e-71	NA	GO:0003824//catalytic activity	NA	Lipid transport and metabolism ;	NA	gi|83776426|dbj|BAE66545.1|//unnamed protein product [Aspergillus oryzae RIB40]
AO090003001446	1115	62.2238	917.234	3.88175	7.54196e-215	Up	5.22793e-216	GO:0016021//integral component of membrane	NA	NA	NA	NA	gi|169772061|ref|XP_001820500.1|//hypothetical protein AOR_1_2546154 [Aspergillus oryzae RIB40]
AO090010000048	6366	1.09965	16.206	3.88142	1.18721e-05	Up	5.80216e-06	NA	GO:0022892//substrate-specific transporter activity;GO:0016787//hydrolase activity;GO:0019842//vitamin binding	GO:0008152//metabolic process	Secondary metabolites biosynthesis, transport and catabolism ;	K15321//naphtho-gamma-pyrone polyketide synthase	gi|391873361|gb|EIT82404.1|//polyketide synthase module [Aspergillus oryzae 3.042]
AO090102000259	7730	131.607	1939.05	3.88105	0	Up	0	NA	GO:0032559//adenyl ribonucleotide binding	GO:0012501//programmed cell death	NA	K10380//ankyrin	gi|317148051|ref|XP_001822471.2|//NACHT domain protein [Aspergillus oryzae RIB40];gi|83771206|dbj|BAE61338.1|//unnamed protein product [Aspergillus oryzae RIB40]
AO090701000647	1467	10.2255	149.475	3.86966	4.3896e-39	Up	8.99497e-40	NA	GO:0005506//iron ion binding;GO:0016491//oxidoreductase activity	GO:0008152//metabolic process	Secondary metabolites biosynthesis, transport and catabolism ;	K17475//tryprostatin B 6-hydroxylase [EC:1.14.13.176];K07824//benzoate 4-monooxygenase [EC:1.14.13.12]	gi|169777991|ref|XP_001823461.1|//cytochrome P450 [Aspergillus oryzae RIB40]
AO090023000260	948	190.816	2777.08	3.86332	0	Up	0	NA	GO:0003824//catalytic activity	GO:0008152//metabolic process	Posttranslational modification, protein turnover, chaperones ;	NA	gi|169772729|ref|XP_001820833.1|//thioredoxin reductase GliT [Aspergillus oryzae RIB40]
AO090038000221	1824	7.46731	108.587	3.86212	4.2262e-27	Up	1.05003e-27	NA	NA	NA	NA	NA	gi|83773914|dbj|BAE64039.1|//unnamed protein product [Aspergillus oryzae RIB40];gi|914761663|gb|KOC15478.1|//hypothetical protein AFLA70_217g001500 [Aspergillus flavus AF70]
AO090005000518	1893	0.697147	10.0946	3.85597	0.000547974	Up	0.00029994	NA	NA	NA	NA	NA	gi|83765427|dbj|BAE55570.1|//unnamed protein product [Aspergillus oryzae RIB40]
AO090003001544	1530	41.672	602.639	3.85414	1.40813e-145	Up	1.26256e-146	GO:0016021//integral component of membrane	GO:0016705//oxidoreductase activity, acting on paired donors, with incorporation or reduction of molecular oxygen;GO:0020037//heme binding;GO:0005506//iron ion binding;GO:0004497//monooxygenase activity;GO:0016491//oxidoreductase activity	GO:0008152//metabolic process;GO:0055114//oxidation-reduction process	Secondary metabolites biosynthesis, transport and catabolism ;	K21294//gliotoxin biosynthesis cytochrome P450 monooxygenase	gi|83768439|dbj|BAE58578.1|//unnamed protein product [Aspergillus oryzae RIB40];gi|391872897|gb|EIT81977.1|//hypothetical protein Ao3042_01480 [Aspergillus oryzae 3.042]
AO090010000564	1653	0.693703	10.0061	3.85042	0.00051011	Up	0.000278651	GO:0031224//intrinsic component of membrane	GO:0005275//amine transmembrane transporter activity	GO:0006865//amino acid transport	Amino acid transport and metabolism ;	K16261//yeast amino acid transporter	gi|169786157|ref|XP_001827539.1|//amino acid transporter [Aspergillus oryzae RIB40]
AO090701000246	840	14.8959	214.611	3.84874	1.63081e-54	Up	2.7473e-55	GO:0044423//virion part	NA	NA	NA	NA	gi|83771852|dbj|BAE61982.1|//unnamed protein product [Aspergillus oryzae RIB40]
AO090010000073	1281	25.7218	369.052	3.84276	3.24266e-91	Up	3.94922e-92	NA	GO:0005488//binding	GO:0008152//metabolic process	NA	NA	gi|83775867|dbj|BAE65986.1|//unnamed protein product [Aspergillus oryzae RIB40];gi|914764964|gb|KOC18773.1|//hypothetical protein AFLA70_4g008620 [Aspergillus flavus AF70]
AO090026000087	5591	26.4391	375.104	3.82654	4.38332e-77	Up	6.04053e-78	NA	NA	NA	NA	K10380//ankyrin;K16261//yeast amino acid transporter	gi|83769449|dbj|BAE59584.1|//unnamed protein product [Aspergillus oryzae RIB40];gi|238497255|ref|XP_002379863.1|//ankyrin repeat-containing protein, putative [Aspergillus flavus NRRL3357]
AO090023000948	873	17.876	252.5	3.82019	2.70034e-62	Up	4.1886e-63	NA	GO:0004721//phosphoprotein phosphatase activity	GO:0006796//phosphate-containing compound metabolic process	Signal transduction mechanisms ;	NA	gi|169773943|ref|XP_001821440.1|//hypothetical protein AOR_1_1682144 [Aspergillus oryzae RIB40]
AO090012000342	981	2.79868	38.9538	3.79894	4.05335e-11	Up	1.55149e-11	NA	NA	NA	Cell wall/membrane/envelope biogenesis ; Carbohydrate transport and metabolism ;	K00140//malonate-semialdehyde dehydrogenase (acetylating) / methylmalonate-semialdehyde dehydrogenase [EC:1.2.1.18 1.2.1.27]	gi|169762948|ref|XP_001727374.1|//HSCARG dehydrogenase [Aspergillus oryzae RIB40]
AO090005001209	3140	2988.59	41212.1	3.78553	0	Up	0	GO:0005829//cytosol;GO:0005635//nuclear envelope	GO:0051787//misfolded protein binding;GO:0005524//ATP binding;GO:0032559//adenyl ribonucleotide binding;GO:0016462//pyrophosphatase activity;GO:0016887//ATPase activity	GO:0043170//macromolecule metabolic process;GO:0019538//protein metabolic process;GO:0050896//response to stimulus;GO:0071218//cellular response to misfolded protein;GO:0042026//protein refolding;GO:0043335//protein unfolding	Posttranslational modification, protein turnover, chaperones ;	K03695//ATP-dependent Clp protease ATP-binding subunit ClpB	gi|966768393|dbj|GAQ35969.1|//heat shock protein Hsp98/Hsp104/ClpA [Aspergillus niger];gi|169767380|ref|XP_001818161.1|//heat shock protein hsp98 [Aspergillus oryzae RIB40]
AO090003000391	5207	137.079	1879.21	3.77705	0	Up	0	NA	GO:0003824//catalytic activity	NA	NA	K06130//lysophospholipase II [EC:3.1.1.5]	gi|83767435|dbj|BAE57574.1|//unnamed protein product [Aspergillus oryzae RIB40];gi|914757309|gb|KOC11417.1|//hypothetical protein AFLA70_176g002560 [Aspergillus flavus AF70]
AO090701000904	1057	2.59898	35.395	3.76753	3.60231e-10	Up	1.43157e-10	GO:0016021//integral component of membrane	NA	NA	NA	NA	gi|317149795|ref|XP_001823682.2|//hypothetical protein AOR_1_1584114 [Aspergillus oryzae RIB40];gi|83772419|dbj|BAE62549.1|//unnamed protein product [Aspergillus oryzae RIB40]
AO090003000248	966	29.119	396.287	3.76651	1.68413e-98	Up	1.97822e-99	NA	GO:0003824//catalytic activity	GO:0008152//metabolic process	NA	NA	gi|83767317|dbj|BAE57456.1|//unnamed protein product [Aspergillus oryzae RIB40]
AO090003001321	5447	3871.11	52540.7	3.76262	0	Up	0	NA	GO:0016787//hydrolase activity	NA	Chromatin structure and dynamics ; Secondary metabolites biosynthesis, transport and catabolism ;	K11407//histone deacetylase 6 [EC:3.5.1.98]	gi|83768243|dbj|BAE58382.1|//unnamed protein product [Aspergillus oryzae RIB40];gi|317144802|ref|XP_001820384.2|//histone deacetylase hda1 [Aspergillus oryzae RIB40]
AO090010000729	2244	210.504	2851.24	3.75967	0	Up	0	NA	GO:0070011//peptidase activity, acting on L-amino acid peptides	GO:0019538//protein metabolic process	NA	NA	gi|169786437|ref|XP_001827679.1|//hypothetical protein AOR_1_1226024 [Aspergillus oryzae RIB40]
AO09M000000022	1467	1.76901	23.9079	3.75647	5.76552e-07	Up	2.62721e-07	GO:0043231//intracellular membrane-bounded organelle	GO:0050136//NADH dehydrogenase (quinone) activity	GO:0022904//respiratory electron transport chain	Energy production and conversion ;	K03881//NADH-ubiquinone oxidoreductase chain 4 [EC:1.6.5.3]	gi|380702243|gb|AFD96012.1|//NADH dehydrogenase subunit 4 (mitochondrion) [Aspergillus oryzae]
AO090010000133	1020	12.5853	169.975	3.75551	1.6816e-41	Up	3.3264e-42	GO:0044464//cell part;GO:0005622//intracellular	GO:0032561//guanyl ribonucleotide binding;GO:0005525//GTP binding	GO:0007264//small GTPase mediated signal transduction;GO:0035556//intracellular signal transduction	General function prediction only ;	K04513//Ras homolog gene family, member A;K07975//Rho family, other	gi|169785427|ref|XP_001827174.1|//GTP-binding protein rhoA [Aspergillus oryzae RIB40]
AO090020000711	1593	1.09789	14.7843	3.75126	2.64228e-05	Up	1.32248e-05	GO:0031224//intrinsic component of membrane	GO:0022857//transmembrane transporter activity	GO:0006810//transport	Carbohydrate transport and metabolism ; Amino acid transport and metabolism ; Inorganic ion transport and metabolism ; General function prediction only ;	K08139//MFS transporter, SP family, sugar:H+ symporter	gi|83773726|dbj|BAE63853.1|//unnamed protein product [Aspergillus oryzae RIB40]
AO090009000069	1221	0.25572	3.4137	3.7387	0.0150961	Up	0.00942204	NA	NA	NA	NA	NA	gi|83764441|dbj|BAE54585.1|//unnamed protein product [Aspergillus oryzae RIB40]
AO090102000303	735	0.447368	5.95813	3.73533	0.0032823	Up	0.00191082	NA	NA	NA	NA	NA	gi|169776075|ref|XP_001822504.1|//hypothetical protein AOR_1_528134 [Aspergillus oryzae RIB40]
AO090020000495	2136	372.183	4949.17	3.7331	0	Up	0	NA	GO:0016879//ligase activity, forming carbon-nitrogen bonds;GO:0032559//adenyl ribonucleotide binding	NA	Lipid transport and metabolism ;	K01968//3-methylcrotonyl-CoA carboxylase alpha subunit [EC:6.4.1.4]	gi|914754635|gb|KOC08800.1|//putative 3-methylcrotonyl-CoA carboxylase subunit alpha (MccA) [Aspergillus flavus AF70]
AO090020000700	1362	1.34327	17.8127	3.72909	1.75588e-05	Up	8.67675e-06	NA	NA	NA	Amino acid transport and metabolism ;	NA	gi|83773716|dbj|BAE63843.1|//unnamed protein product [Aspergillus oryzae RIB40]
AO090003000213	2024	93.2352	1236.1	3.72877	3.20489e-280	Up	1.77312e-281	GO:0043231//intracellular membrane-bounded organelle;GO:0005634//nucleus	GO:0000981//RNA polymerase II transcription factor activity, sequence-specific DNA binding;GO:0046914//transition metal ion binding;GO:0008270//zinc ion binding;GO:0001071//nucleic acid binding transcription factor activity	GO:0006357//regulation of transcription from RNA polymerase II promoter;GO:0006351//transcription, DNA-templated	NA	NA	gi|83767286|dbj|BAE57425.1|//unnamed protein product [Aspergillus oryzae RIB40];gi|914759360|gb|KOC13207.1|//Zn(II)2Cys6 transcription factor [Aspergillus flavus AF70]
BGI_novel_G000106	2993	36.5891	484.787	3.72786	1.18645e-101	Up	1.36306e-102	NA	GO:0016491//oxidoreductase activity;GO:0071949//FAD binding	GO:0055114//oxidation-reduction process	NA	K00480//salicylate hydroxylase [EC:1.14.13.1]	gi|966765115|dbj|GAQ42121.1|//salicylate hydroxylase [Aspergillus niger]
AO090009000539	1932	4.95087	65.4618	3.7249	1.19573e-16	Up	3.84046e-17	NA	NA	NA	NA	NA	gi|169765021|ref|XP_001816982.1|//saponin hydrolase precursor [Aspergillus oryzae RIB40]
AO090003000175	1886	67.1248	886.601	3.72337	1.70545e-196	Up	1.26539e-197	GO:0031224//intrinsic component of membrane;GO:0016021//integral component of membrane;GO:0019866//organelle inner membrane	NA	GO:0006810//transport;GO:0055085//transmembrane transport	NA	K15104//solute carrier family 25 (mitochondrial oxoglutarate transporter), member 11	gi|169769853|ref|XP_001819396.1|//2-oxoglutarate/malate carrier protein [Aspergillus oryzae RIB40]
BGI_novel_G000142	1141	80.3376	1057.99	3.71911	1.39199e-244	Up	8.67508e-246	GO:0016021//integral component of membrane	GO:0016811//hydrolase activity, acting on carbon-nitrogen (but not peptide) bonds, in linear amides	GO:0006672//ceramide metabolic process	NA	K04711//dihydroceramidase [EC:3.5.1.-]	gi|317149171|ref|XP_003190280.1|//alkaline phytoceramidase [Aspergillus oryzae RIB40]
AO090005000480	987	5.13208	67.4659	3.71654	1.15673e-17	Up	3.59806e-18	NA	GO:0003824//catalytic activity	GO:0008152//metabolic process	Energy production and conversion ;	K05275//pyridoxine 4-dehydrogenase [EC:1.1.1.65]	gi|169766138|ref|XP_001817540.1|//aldo-keto reductase (YakC) [Aspergillus oryzae RIB40]
AO090103000174	1959	4.52649	59.5035	3.71651	8.55171e-15	Up	2.88678e-15	NA	NA	NA	NA	NA	gi|83775516|dbj|BAE65636.1|//unnamed protein product [Aspergillus oryzae RIB40];gi|914760071|gb|KOC13887.1|//hypothetical protein AFLA70_280g001601 [Aspergillus flavus AF70]
AO090020000660	2386	18.0827	236.24	3.70757	5.93784e-55	Up	9.94833e-56	GO:0043231//intracellular membrane-bounded organelle;GO:0005634//nucleus	GO:0003677//DNA binding;GO:0000981//RNA polymerase II transcription factor activity, sequence-specific DNA binding;GO:0046914//transition metal ion binding;GO:0008270//zinc ion binding;GO:0001071//nucleic acid binding transcription factor activity;GO:0003676//nucleic acid binding	GO:0006357//regulation of transcription from RNA polymerase II promoter;GO:0006351//transcription, DNA-templated	NA	K10884//ATP-dependent DNA helicase 2 subunit 1;K00767//nicotinate-nucleotide pyrophosphorylase (carboxylating) [EC:2.4.2.19]	gi|238504824|ref|XP_002383641.1|//C6 transcription factor, putative [Aspergillus flavus NRRL3357];gi|83773681|dbj|BAE63808.1|//unnamed protein product [Aspergillus oryzae RIB40]
AO090012000774	1098	40.6428	526.585	3.69559	2.29709e-101	Up	2.64959e-102	GO:0031224//intrinsic component of membrane	GO:0042625//ATPase coupled ion transmembrane transporter activity;GO:0032559//adenyl ribonucleotide binding	GO:0009206//purine ribonucleoside triphosphate biosynthetic process;GO:0006811//ion transport;GO:0009207//purine ribonucleoside triphosphate catabolic process	NA	K00108//choline dehydrogenase [EC:1.1.99.1];K01613//phosphatidylserine decarboxylase [EC:4.1.1.65];K14950//cation-transporting ATPase 13A1 [EC:3.6.3.-];K06110//exocyst complex component 3;K01051//pectinesterase [EC:3.1.1.11]	gi|914752892|gb|KOC07080.1|//cation-transporting ATPase 4 [Aspergillus flavus AF70]
AO090001000507	1191	99.8346	1292.9	3.69493	2.50314e-301	Up	1.32496e-302	NA	NA	NA	Transcription ;	K03254//translation initiation factor 3 subunit A	gi|169769098|ref|XP_001819019.1|//hypothetical protein AOR_1_892164 [Aspergillus oryzae RIB40]
AO090026000057	1842	127.91	1649.54	3.68886	0	Up	0	GO:0031224//intrinsic component of membrane	GO:0022857//transmembrane transporter activity	GO:0071702//organic substance transport	Carbohydrate transport and metabolism ; Amino acid transport and metabolism ; Inorganic ion transport and metabolism ; General function prediction only ;	K08139//MFS transporter, SP family, sugar:H+ symporter	gi|169774179|ref|XP_001821557.1|//facilitated glucose transporter [Aspergillus oryzae RIB40]
AO090012000670	528	692.599	8915.56	3.68623	0	Up	0	NA	GO:0005506//iron ion binding	NA	NA	K12562//amphiphysin;K01580//glutamate decarboxylase [EC:4.1.1.15]	gi|169763492|ref|XP_001727646.1|//mismatched base pair and cruciform DNA recognition protein [Aspergillus oryzae RIB40]
AO090023000026	1545	0.225619	2.89037	3.67929	0.0167261	Up	0.0104948	GO:0031224//intrinsic component of membrane	GO:0022857//transmembrane transporter activity	GO:0071702//organic substance transport	Carbohydrate transport and metabolism ; Amino acid transport and metabolism ; Inorganic ion transport and metabolism ; General function prediction only ;	K08139//MFS transporter, SP family, sugar:H+ symporter	gi|83768478|dbj|BAE58615.1|//unnamed protein product [Aspergillus oryzae RIB40]
AO090012000227	945	292.647	3748.37	3.67903	0	Up	0	NA	GO:0016701//oxidoreductase activity, acting on single donors with incorporation of molecular oxygen	NA	Cell cycle control, cell division, chromosome partitioning ;	K17878//nicotinamide N-methyltransferase [EC:2.1.1.1]	gi|169762758|ref|XP_001727279.1|//phytanoyl-CoA dioxygenase family protein [Aspergillus oryzae RIB40]
AO09M000000006	1233	0.225429	2.88395	3.6773	0.0167969	Up	0.0105454	NA	NA	NA	NA	NA	gi|380702231|gb|AFD96000.1|//ribosomal protein S5 (mitochondrion) [Aspergillus oryzae]
AO090701000426	1272	0.225429	2.88395	3.6773	0.0167969	Up	0.0105454	NA	GO:0046914//transition metal ion binding;GO:0003824//catalytic activity	GO:0008152//metabolic process	Energy production and conversion ; General function prediction only ;	K13953//alcohol dehydrogenase, propanol-preferring [EC:1.1.1.1];K15172//transcription elongation factor SPT5;K00344//NADPH2:quinone reductase [EC:1.6.5.5]	gi|83772007|dbj|BAE62137.1|//unnamed protein product [Aspergillus oryzae RIB40]
AO090038000509	1665	0.225429	2.88395	3.6773	0.0167969	Up	0.0105454	GO:0031224//intrinsic component of membrane	GO:0022857//transmembrane transporter activity	GO:0071702//organic substance transport	Carbohydrate transport and metabolism ; Amino acid transport and metabolism ; Inorganic ion transport and metabolism ; General function prediction only ;	K08139//MFS transporter, SP family, sugar:H+ symporter	gi|83774166|dbj|BAE64291.1|//unnamed protein product [Aspergillus oryzae RIB40]
AO090001000295	2418	454.557	5808.32	3.67559	0	Up	0	NA	GO:0016747//transferase activity, transferring acyl groups other than amino-acyl groups	NA	NA	K00624//carnitine O-acetyltransferase [EC:2.3.1.7]	gi|391863151|gb|EIT72464.1|//carnitine O-acyltransferase CPT2/YAT1 [Aspergillus oryzae 3.042]
AO090011000247	2134	7.27313	92.8837	3.67478	3.00627e-23	Up	8.1169e-24	NA	GO:0003824//catalytic activity;GO:0016491//oxidoreductase activity	GO:0008152//metabolic process;GO:0055114//oxidation-reduction process	Amino acid transport and metabolism ;	K13366//polyamine oxidase [EC:1.5.3.14 1.5.3.16 1.5.3.-];K00274//monoamine oxidase [EC:1.4.3.4];K00280//lysyl oxidase-like protein 2/3/4 [EC:1.4.3.-]	gi|83774656|dbj|BAE64779.1|//unnamed protein product [Aspergillus oryzae RIB40]
AO090011000201	582	1706.9	21764.1	3.6725	0	Up	0	NA	NA	NA	Carbohydrate transport and metabolism ;	NA	NA
AO090010000074	1251	9.17018	116.448	3.6666	7.91577e-29	Up	1.91573e-29	NA	GO:0046872//metal ion binding;GO:0016701//oxidoreductase activity, acting on single donors with incorporation of molecular oxygen;GO:0016491//oxidoreductase activity	GO:0008152//metabolic process;GO:0055114//oxidation-reduction process	General function prediction only ;	K04125//gibberellin 2-oxidase [EC:1.14.11.13];K03305//proton-dependent oligopeptide transporter, POT family	gi|317159352|ref|XP_001827120.2|//oxidoreductase, 2OG-Fe(II) oxygenase family [Aspergillus oryzae RIB40] ;gi|83775868|dbj|BAE65987.1|//unnamed protein product [Aspergillus oryzae RIB40]
AO090102000148	1185	90.7758	1152.04	3.66575	1.0811e-192	Up	8.08114e-194	GO:0031224//intrinsic component of membrane;GO:0019866//organelle inner membrane	NA	GO:0006810//transport	NA	K15084//solute carrier family 25 (mitochondrial carrier protein), member 16	gi|169775827|ref|XP_001822380.1|//carrier protein LEU5 [Aspergillus oryzae RIB40]
BGI_novel_G000072	386	0.673592	8.5486	3.66574	0.00103995	Up	0.000581581	NA	GO:0003824//catalytic activity	GO:0009116//nucleoside metabolic process	NA	K15110//solute carrier family 25 (mitochondrial 2-oxodicarboxylate transporter), member 21	gi|238493143|ref|XP_002377808.1|//conserved hypothetical protein [Aspergillus flavus NRRL3357]
AO090103000081	1341	0.877838	11.1041	3.661	0.000220454	Up	0.000116975	NA	NA	GO:0006810//transport	Carbohydrate transport and metabolism ; Amino acid transport and metabolism ; Inorganic ion transport and metabolism ; General function prediction only ;	K17866//diphthamide biosynthesis protein 2;K11231//osomolarity two-component system, sensor histidine kinase SLN1 [EC:2.7.13.3];K02835//peptide chain release factor 1;K01533//Cu2+-exporting ATPase [EC:3.6.3.4]	gi|169784456|ref|XP_001826689.1|//MFS monocarboxylate transporter [Aspergillus oryzae RIB40]
AO090005001248	1314	624.872	7839.57	3.64914	0	Up	0	NA	GO:0016627//oxidoreductase activity, acting on the CH-CH group of donors;GO:0050662//coenzyme binding	GO:0008152//metabolic process	Lipid transport and metabolism ;	K00253//isovaleryl-CoA dehydrogenase [EC:1.3.8.4]	gi|169767448|ref|XP_001818195.1|//short/branched chain specific acyl-CoA dehydrogenase [Aspergillus oryzae RIB40]
AO090012000644	941	15.172	189.277	3.64101	3.6947e-43	Up	7.14588e-44	NA	NA	NA	NA	NA	gi|317137298|ref|XP_001727626.2|//hypothetical protein AOR_1_1122194 [Aspergillus oryzae RIB40];gi|83770654|dbj|BAE60787.1|//unnamed protein product [Aspergillus oryzae RIB40]
AO090010000018	426	5411.39	67366.9	3.63797	0	Up	0	NA	NA	GO:0075259//spore-bearing organ development;GO:0001897//cytolysis by symbiont of host cells	NA	NA	gi|914760916|gb|KOC14731.1|//hypothetical protein AFLA70_230g002131 [Aspergillus flavus AF70]
AO090102000332	663	0.228683	2.84636	3.6377	0.0184869	Up	0.0116643	NA	NA	NA	NA	NA	gi|83771262|dbj|BAE61394.1|//unnamed protein product [Aspergillus oryzae RIB40]
AO090003000254	1485	3.64678	45.1563	3.63023	1.38681e-12	Up	5.03504e-13	GO:0031224//intrinsic component of membrane	GO:0022857//transmembrane transporter activity	GO:0071702//organic substance transport	Carbohydrate transport and metabolism ; Amino acid transport and metabolism ; Inorganic ion transport and metabolism ; General function prediction only ;	K08139//MFS transporter, SP family, sugar:H+ symporter	gi|169769989|ref|XP_001819464.1|//MFS quinate transporter [Aspergillus oryzae RIB40]
BGI_novel_G000159	571	2.61618	32.3535	3.62839	1.11749e-08	Up	4.70329e-09	NA	NA	NA	NA	NA	gi|317156337|ref|XP_003190715.1|//tetratricopeptide repeat domain protein [Aspergillus oryzae RIB40]
AO090012000217	1185	140.947	1739.03	3.62506	0	Up	0	NA	GO:0016407//acetyltransferase activity	NA	NA	K18854//lysine N-acetyltransferase [EC:2.3.1.32]	gi|169762740|ref|XP_001727270.1|//GNAT family acetyltransferase [Aspergillus oryzae RIB40]
AO090001000304	786	1239.73	15237.5	3.61953	0	Up	0	GO:0031224//intrinsic component of membrane	NA	NA	NA	NA	gi|169768744|ref|XP_001818842.1|//hypoxia induced family protein [Aspergillus oryzae RIB40]
AO090010000445	966	4088.67	50249.4	3.6194	0	Up	0	NA	NA	NA	Function unknown ;	K19562//bifunctional dethiobiotin synthetase / adenosylmethionine---8-amino-7-oxononanoate aminotransferase [EC:6.3.3.3 2.6.1.62]	gi|169785949|ref|XP_001827435.1|//hypothetical protein AOR_1_726024 [Aspergillus oryzae RIB40]
AO090005000189	2073	70.5475	866.09	3.61785	1.6474e-198	Up	1.21344e-199	NA	NA	NA	Carbohydrate transport and metabolism ;	K07942//ADP-ribosylation factor-like protein 1	gi|317139141|ref|XP_001817291.2|//hypothetical protein AOR_1_346174 [Aspergillus oryzae RIB40];gi|83765146|dbj|BAE55289.1|//unnamed protein product [Aspergillus oryzae RIB40]
AO090120000158	2988	2.58791	31.7415	3.61651	2.8446e-09	Up	1.17026e-09	NA	GO:0015925//galactosidase activity;GO:0043167//ion binding	GO:0005976//polysaccharide metabolic process	Carbohydrate transport and metabolism ;	K01190//beta-galactosidase [EC:3.2.1.23]	gi|391873535|gb|EIT82565.1|//beta-galactosidase [Aspergillus oryzae 3.042]
AO090010000530	1191	4.95739	60.1734	3.60147	1.09136e-14	Up	3.69213e-15	NA	NA	NA	NA	NA	gi|169786097|ref|XP_001827509.1|//hypothetical protein AOR_1_884024 [Aspergillus oryzae RIB40]
AO090206000025	2397	842.259	10222.6	3.60135	0	Up	0	NA	NA	NA	Posttranslational modification, protein turnover, chaperones ;	K01764//cytochrome c heme-lyase [EC:4.4.1.17];K14016//ubiquitin fusion degradation protein 1	gi|83775278|dbj|BAE65400.1|//unnamed protein product [Aspergillus oryzae RIB40]
AO090005001407	468	149.167	1810.36	3.60127	0	Up	0	NA	GO:0003677//DNA binding	NA	Transcription ;	K03627//putative transcription factor	gi|169767726|ref|XP_001818334.1|//multiprotein-bridging factor 1 [Aspergillus oryzae RIB40]
AO090010000585	1825	11.3395	137.572	3.60076	1.6546e-31	Up	3.8353e-32	GO:0016021//integral component of membrane	NA	NA	NA	K03380//phenol 2-monooxygenase [EC:1.14.13.7]	gi|83776301|dbj|BAE66420.1|//unnamed protein product [Aspergillus oryzae RIB40];gi|317159123|ref|XP_001827553.2|//hypothetical protein AOR_1_974024 [Aspergillus oryzae RIB40]
AO090012000617	876	4.71948	57.1437	3.59789	2.71237e-14	Up	9.27096e-15	GO:0044464//cell part	GO:0008324//cation transmembrane transporter activity	GO:0006812//cation transport	Inorganic ion transport and metabolism ;	K16073//magnesium transporter	gi|83770632|dbj|BAE60765.1|//unnamed protein product [Aspergillus oryzae RIB40]
AO090023000187	1970	103.192	1247.4	3.59551	3.50385e-234	Up	2.27397e-235	NA	GO:0005525//GTP binding;GO:0003924//GTPase activity	GO:0006810//transport	Carbohydrate transport and metabolism ; Amino acid transport and metabolism ; Inorganic ion transport and metabolism ; General function prediction only ;	K20291//conserved oligomeric Golgi complex subunit 4;K17065//dynamin 1-like protein [EC:3.6.5.5]	gi|83768623|dbj|BAE58760.1|//unnamed protein product [Aspergillus oryzae RIB40];gi|238490498|ref|XP_002376486.1|//dynamin, putative [Aspergillus flavus NRRL3357]
AO090005000003	1284	0.488308	5.87144	3.58785	0.00702625	Up	0.00422364	NA	GO:0032559//adenyl ribonucleotide binding;GO:0016772//transferase activity, transferring phosphorus-containing groups	GO:0006007//glucose catabolic process;GO:0006796//phosphate-containing compound metabolic process	Carbohydrate transport and metabolism ;	K00844//hexokinase [EC:2.7.1.1]	gi|83764987|dbj|BAE55130.1|//unnamed protein product [Aspergillus oryzae RIB40]
AO090010000077	2092	10.9321	130.608	3.5786	1.84873e-28	Up	4.50141e-29	NA	GO:0004553//hydrolase activity, hydrolyzing O-glycosyl compounds	GO:0009056//catabolic process;GO:0000270//peptidoglycan metabolic process	NA	K01185//lysozyme [EC:3.2.1.17]	gi|83775872|dbj|BAE65991.1|//unnamed protein product [Aspergillus oryzae RIB40];gi|169785325|ref|XP_001827123.1|//hypothetical protein AOR_1_130024 [Aspergillus oryzae RIB40]
AO090001000492	1044	0.931879	11.1108	3.57567	0.000695272	Up	0.000382934	NA	GO:0015925//galactosidase activity;GO:0043167//ion binding	GO:0045229//external encapsulating structure organization;GO:0044247//cellular polysaccharide catabolic process	Carbohydrate transport and metabolism ;	K01224//arabinogalactan endo-1,4-beta-galactosidase [EC:3.2.1.89]	gi|169769072|ref|XP_001819006.1|//arabinogalactan endo-1,4-beta-galactosidase A [Aspergillus oryzae RIB40]
AO090023000143	1828	13.4073	159.161	3.56939	7.5402e-39	Up	1.55274e-39	NA	NA	NA	Function unknown ;	NA	gi|914763356|gb|KOC17165.1|//hypothetical protein AFLA70_209g002362 [Aspergillus flavus AF70];gi|83768584|dbj|BAE58721.1|//unnamed protein product [Aspergillus oryzae RIB40]
AO090010000696	1269	0.241417	2.86135	3.56709	0.0218715	Up	0.0139408	NA	GO:0048037//cofactor binding	GO:0008152//metabolic process	NA	NA	gi|169786375|ref|XP_001827648.1|//NAD dependent epimerase/dehydratase family protein [Aspergillus oryzae RIB40]
AO090012000283	996	0.460152	5.42631	3.55979	0.006657	Up	0.00399003	NA	NA	NA	NA	K00606//3-methyl-2-oxobutanoate hydroxymethyltransferase [EC:2.1.2.11]	gi|83770353|dbj|BAE60486.1|//unnamed protein product [Aspergillus oryzae RIB40]
AO090009000628	2064	148.861	1749.15	3.55462	0	Up	0	GO:0005779//integral component of peroxisomal membrane;GO:0031231//intrinsic component of peroxisomal membrane	NA	GO:0006810//transport;GO:0007031//peroxisome organization;GO:0055085//transmembrane transport;GO:0006996//organelle organization	Carbohydrate transport and metabolism ; Amino acid transport and metabolism ; Inorganic ion transport and metabolism ; General function prediction only ;	K01939//adenylosuccinate synthase [EC:6.3.4.4];K13336//peroxin-3	gi|83764909|dbj|BAE55053.1|//unnamed protein product [Aspergillus oryzae RIB40];gi|238503536|ref|XP_002383001.1|//MFS transporter, putative [Aspergillus flavus NRRL3357]
AO090102000440	419	0.279994	3.27982	3.55015	0.0233729	Up	0.0149579	NA	NA	NA	NA	NA	gi|83771352|dbj|BAE61484.1|//unnamed protein product [Aspergillus oryzae RIB40];gi|317156337|ref|XP_003190715.1|//tetratricopeptide repeat domain protein [Aspergillus oryzae RIB40]
AO090020000135	1182	0.242265	2.83545	3.54892	0.0227619	Up	0.0145502	NA	NA	NA	Transcription ;	K08490//syntaxin 5	gi|83773237|dbj|BAE63364.1|//unnamed protein product [Aspergillus oryzae RIB40]
AO090026000452	3507	1073.29	12533.5	3.54567	0	Up	0	NA	GO:0032559//adenyl ribonucleotide binding;GO:0004673//protein histidine kinase activity	GO:0007165//signal transduction;GO:0006468//protein phosphorylation	Signal transduction mechanisms ;	K00898//pyruvate dehydrogenase kinase 2/3/4 [EC:2.7.11.2]	gi|83769767|dbj|BAE59902.1|//unnamed protein product [Aspergillus oryzae RIB40];gi|317147132|ref|XP_001821904.2|//[Pyruvate dehydrogenase [lipoamide]] kinase [Aspergillus oryzae RIB40]
AO090138000058	795	16.6563	194.392	3.54483	1.58876e-42	Up	3.10351e-43	NA	GO:0003824//catalytic activity	GO:0008152//metabolic process	Cell wall/membrane/envelope biogenesis ;	K16066//3-hydroxy acid dehydrogenase / malonic semialdehyde reductase [EC:1.1.1.381 1.1.1.-]	gi|169782221|ref|XP_001825573.1|//short-chain dehydrogenase/reductase [Aspergillus oryzae RIB40]
AO090005000583	2745	8146.17	94867	3.54171	0	Up	0	NA	NA	NA	NA	NA	gi|83765484|dbj|BAE55627.1|//unnamed protein product [Aspergillus oryzae RIB40];gi|914756455|gb|KOC10620.1|//hypothetical protein AFLA70_287g001190 [Aspergillus flavus AF70]
AO090166000094	747	28.2692	328.567	3.53889	5.54721e-75	Up	7.74147e-76	NA	NA	NA	NA	NA	gi|83771611|dbj|BAE61742.1|//unnamed protein product [Aspergillus oryzae RIB40]
BGI_novel_G000100	1629	3.00932	34.8402	3.53325	1.44023e-09	Up	5.87864e-10	GO:0005634//nucleus	GO:0000981//RNA polymerase II transcription factor activity, sequence-specific DNA binding;GO:0008270//zinc ion binding	GO:0006357//regulation of transcription from RNA polymerase II promoter	NA	K05991//endoglycosylceramidase [EC:3.2.1.123]	gi|914763344|gb|KOC17153.1|//hypothetical protein AFLA70_209g002241 [Aspergillus flavus AF70]
AO090102000092	783	12.6472	146.153	3.53058	1.19119e-30	Up	2.805e-31	NA	GO:0016787//hydrolase activity	NA	Amino acid transport and metabolism ;	K15530//rhamnogalacturonan acetylesterase [EC:3.1.1.86]	gi|169775735|ref|XP_001822334.1|//GDSL-like lipase/acylhydrolase [Aspergillus oryzae RIB40]
AO090003000159	2073	22.5735	259.72	3.52425	6.62096e-60	Up	1.04833e-60	NA	NA	NA	NA	NA	gi|317145086|ref|XP_001819383.2|//hypothetical protein AOR_1_2776154 [Aspergillus oryzae RIB40];gi|83767242|dbj|BAE57381.1|//unnamed protein product [Aspergillus oryzae RIB40];gi|992087236|ref|XP_015407151.1|//hypothetical protein ANOM_005595, partial [Aspergillus nomius NRRL 13137]
AO090009000165	1365	1.95458	22.4784	3.52361	6.71692e-07	Up	3.07186e-07	NA	GO:0016769//transferase activity, transferring nitrogenous groups;GO:0016846//carbon-sulfur lyase activity;GO:0048037//cofactor binding	GO:0008652//cellular amino acid biosynthetic process	Amino acid transport and metabolism ;	K10838//xeroderma pigmentosum group C-complementing protein;K14264//kynurenine aminotransferase [EC:2.6.1.7]	gi|169764389|ref|XP_001816666.1|//aspartate aminotransferase [Aspergillus oryzae RIB40]
AO090103000108	1132	67.1569	771.861	3.52273	5.91025e-177	Up	4.6899e-178	NA	NA	NA	NA	NA	gi|169784502|ref|XP_001826712.1|//hypothetical protein AOR_1_188034 [Aspergillus oryzae RIB40]
AO090701000867	669	2.58836	29.6699	3.51889	1.34301e-08	Up	5.67963e-09	NA	NA	NA	NA	NA	gi|238495680|ref|XP_002379076.1|//conserved hypothetical protein [Aspergillus flavus NRRL3357]
AO090023000348	1521	2.42765	27.7272	3.51367	4.62901e-07	Up	2.09995e-07	NA	NA	NA	NA	NA	gi|83768768|dbj|BAE58905.1|//unnamed protein product [Aspergillus oryzae RIB40]
AO090009000144	741	10.0454	114.709	3.51337	1.35628e-24	Up	3.55208e-25	NA	NA	NA	Cell cycle control, cell division, chromosome partitioning ;	NA	gi|83764505|dbj|BAE54649.1|//unnamed protein product [Aspergillus oryzae RIB40]
AO090009000598	1899	587.944	6703.69	3.51121	0	Up	0	NA	GO:0032559//adenyl ribonucleotide binding;GO:0004672//protein kinase activity	GO:0006464//cellular protein modification process	General function prediction only ; Signal transduction mechanisms ; Transcription ; Replication, recombination and repair ;	K08286//protein-serine/threonine kinase [EC:2.7.11.-];K02216//serine/threonine-protein kinase Chk1 [EC:2.7.11.1]	gi|169765119|ref|XP_001817031.1|//serine/threonine protein kinase [Aspergillus oryzae RIB40]
AO090138000043	1074	75.6509	859.93	3.50679	7.48397e-186	Up	5.74577e-187	NA	GO:0003824//catalytic activity;GO:0016740//transferase activity	GO:0006541//glutamine metabolic process;GO:0009108//coenzyme biosynthetic process	NA	K00799//glutathione S-transferase [EC:2.5.1.18]	gi|317156176|ref|XP_001825559.2|//glutathione S transferase [Aspergillus oryzae RIB40] ;gi|83774302|dbj|BAE64426.1|//unnamed protein product [Aspergillus oryzae RIB40]
AO090012000085	2030	340.296	3863.95	3.50521	0	Up	0	GO:0031224//intrinsic component of membrane;GO:0016021//integral component of membrane	GO:0022857//transmembrane transporter activity	GO:0006810//transport;GO:0055085//transmembrane transport	NA	NA	gi|317136582|ref|XP_001727155.2|//MFS transporter [Aspergillus oryzae RIB40];gi|83770183|dbj|BAE60316.1|//unnamed protein product [Aspergillus oryzae RIB40]
AO090011000876	2451	644.897	7298.29	3.50042	0	Up	0	NA	GO:0004471//malate dehydrogenase (decarboxylating) (NAD+) activity;GO:0043169//cation binding;GO:0046872//metal ion binding;GO:0000166//nucleotide binding;GO:0016615//malate dehydrogenase activity;GO:0051287//NAD binding	GO:0043648//dicarboxylic acid metabolic process;GO:0055114//oxidation-reduction process;GO:0006108//malate metabolic process	Energy production and conversion ;	K00029//malate dehydrogenase (oxaloacetate-decarboxylating)(NADP+) [EC:1.1.1.40]	gi|83775192|dbj|BAE65315.1|//unnamed protein product [Aspergillus oryzae RIB40];gi|317157399|ref|XP_001826448.2|//NADP-dependent malic enzyme MaeA [Aspergillus oryzae RIB40]
AO090010000410	2789	207.721	2350.64	3.50033	0	Up	0	NA	NA	NA	NA	K09466//zinc finger protein ADR1	gi|83776158|dbj|BAE66277.1|//unnamed protein product [Aspergillus oryzae RIB40];gi|914755137|gb|KOC09302.1|//hypothetical protein AFLA70_39g004201 [Aspergillus flavus AF70]
AO090701000669	1554	131.071	1483.05	3.50015	0	Up	0	NA	NA	NA	RNA processing and modification ;	K01974//RNA 3'-terminal phosphate cyclase (ATP) [EC:6.5.1.4]	gi|83772214|dbj|BAE62344.1|//unnamed protein product [Aspergillus oryzae RIB40]
AO090009000553	642	2.49129	28.1605	3.4987	0.00716941	Up	0.00431366	NA	NA	NA	General function prediction only ; Signal transduction mechanisms ; Transcription ; Replication, recombination and repair ;	NA	gi|317138557|ref|XP_001816991.2|//IgE-binding protein [Aspergillus oryzae RIB40]
AO090012000161	897	1.12133	12.6339	3.49401	0.000276669	Up	0.000148128	NA	GO:0003824//catalytic activity	GO:0008152//metabolic process	General function prediction only ;	K17739//tetrahydroxynaphthalene reductase [EC:1.1.1.252];K17742//sorbose reductase [EC:1.1.1.289];K00069//15-hydroxyprostaglandin dehydrogenase (NAD) [EC:1.1.1.141]	gi|169762640|ref|XP_001727220.1|//gluconate 5-dehydrogenase [Aspergillus oryzae RIB40]
AO090023000380	627	2.60045	29.2338	3.49081	3.54189e-08	Up	1.52331e-08	NA	GO:0016407//acetyltransferase activity	NA	NA	K15361//WD repeat-containing protein 48;K10437//phenylacetate 2-hydroxylase [EC:1.14.13.-]	gi|169772931|ref|XP_001820934.1|//hypothetical protein AOR_1_650144 [Aspergillus oryzae RIB40]
AO090009000636	1776	20.8101	233.548	3.48836	2.03351e-06	Up	9.52078e-07	GO:0031224//intrinsic component of membrane	GO:0005451//monovalent cation:proton antiporter activity	GO:0055067//monovalent inorganic cation homeostasis;GO:0030001//metal ion transport	Inorganic ion transport and metabolism ;	K12041//solute carrier family 9 (sodium/hydrogen exchanger), member 6/7	gi|83764916|dbj|BAE55060.1|//unnamed protein product [Aspergillus oryzae RIB40]
AO090003000801	1242	1236.31	13806.8	3.48127	0	Up	0	GO:0044424//intracellular part	GO:0043169//cation binding;GO:0005515//protein binding;GO:0032559//adenyl ribonucleotide binding	GO:0044267//cellular protein metabolic process;GO:0006950//response to stress	Posttranslational modification, protein turnover, chaperones ;	K09503//DnaJ homolog subfamily A member 2	gi|169770935|ref|XP_001819937.1|//protein import protein mas5 [Aspergillus oryzae RIB40]
AO090003000984	840	2509.12	27904.9	3.47527	0	Up	0	NA	GO:0005506//iron ion binding	GO:0015669//gas transport	NA	NA	gi|169771251|ref|XP_001820095.1|//hypothetical protein AOR_1_1754154 [Aspergillus oryzae RIB40]
AO090038000539	1314	388.072	4315.53	3.47514	0	Up	0	NA	NA	NA	NA	NA	gi|83774185|dbj|BAE64310.1|//unnamed protein product [Aspergillus oryzae RIB40]
AO090001000305	2304	752.947	8353.95	3.47184	0	Up	0	GO:0031224//intrinsic component of membrane;GO:0016021//integral component of membrane	GO:0005215//transporter activity	GO:0006857//oligopeptide transport;GO:0015833//peptide transport	Amino acid transport and metabolism ;	K03305//proton-dependent oligopeptide transporter, POT family	gi|391863147|gb|EIT72460.1|//H+/oligopeptide symporter [Aspergillus oryzae 3.042]
AO090020000373	1668	0.678579	7.51412	3.46902	0.00253723	Up	0.00146469	NA	GO:0016879//ligase activity, forming carbon-nitrogen bonds;GO:0016810//hydrolase activity, acting on carbon-nitrogen (but not peptide) bonds	NA	Translation, ribosomal structure and biogenesis ;	K01426//amidase [EC:3.5.1.4]	gi|169780474|ref|XP_001824701.1|//acetamidase [Aspergillus oryzae RIB40]
AO090009000091	1662	0.485432	5.34687	3.46135	0.0106049	Up	0.00649588	NA	GO:0003824//catalytic activity;GO:0050662//coenzyme binding	GO:0008152//metabolic process	Energy production and conversion ;	K01166//ribonuclease T2 [EC:3.1.27.1]	gi|169764263|ref|XP_001816603.1|//hypothetical protein AOR_1_154184 [Aspergillus oryzae RIB40]
AO090020000567	522	0.449302	4.93911	3.45849	0.00881185	Up	0.00534973	NA	NA	NA	NA	K02920//large subunit ribosomal protein L36e;K06110//exocyst complex component 3	gi|83773604|dbj|BAE63731.1|//unnamed protein product [Aspergillus oryzae RIB40]
AO090103000168	816	4.92238	53.9797	3.45499	1.59918e-13	Up	5.62355e-14	NA	GO:0003824//catalytic activity	NA	Lipid transport and metabolism ;	K11314//transcriptional adapter 2-alpha;K07511//enoyl-CoA hydratase [EC:4.2.1.17]	gi|169784606|ref|XP_001826764.1|//carnitinyl-CoA dehydratase [Aspergillus oryzae RIB40]
BGI_novel_G000149	3188	26.7905	293.422	3.45318	3.1634e-68	Up	4.68846e-69	NA	NA	NA	NA	NA	gi|914758035|gb|KOC12049.1|//hypothetical protein AFLA70_167g001581 [Aspergillus flavus AF70]
AO090113000198	1296	0.448192	4.90588	3.45232	0.0089724	Up	0.00545546	NA	NA	NA	NA	K08254//glucan endo-1,3-alpha-glucosidase [EC:3.2.1.59]	gi|169779815|ref|XP_001824372.1|//alpha-1,3-glucanase/mutanase [Aspergillus oryzae RIB40]
AO090166000050	1761	2.81494	30.8039	3.45193	2.35363e-08	Up	1.00446e-08	NA	GO:0008484//sulfuric ester hydrolase activity	GO:0006066//alcohol metabolic process	Inorganic ion transport and metabolism ;	K01133//choline-sulfatase [EC:3.1.6.6];K01565//N-sulfoglucosamine sulfohydrolase [EC:3.10.1.1];K01178//glucoamylase [EC:3.2.1.3];K01130//arylsulfatase [EC:3.1.6.1]	gi|169776738|ref|XP_001822835.1|//arylsulfatase [Aspergillus oryzae RIB40]
AO090113000021	1716	0.453246	4.94486	3.44756	0.00896497	Up	0.00545012	NA	GO:0016491//oxidoreductase activity	NA	Inorganic ion transport and metabolism ;	K00485//dimethylaniline monooxygenase (N-oxide forming) [EC:1.14.13.8]	gi|83772958|dbj|BAE63086.1|//unnamed protein product [Aspergillus oryzae RIB40]
AO090012000893	771	23.8423	259.729	3.44541	2.79827e-59	Up	4.4693e-60	NA	GO:0016407//acetyltransferase activity	NA	NA	NA	gi|169763870|ref|XP_001727835.1|//GNAT family acetyltransferase [Aspergillus oryzae RIB40]
AO090011000183	2645	11.3577	123.347	3.44097	6.36994e-24	Up	1.69408e-24	GO:0043231//intracellular membrane-bounded organelle;GO:0005634//nucleus;GO:0016021//integral component of membrane	GO:0003677//DNA binding;GO:0046914//transition metal ion binding;GO:0008270//zinc ion binding;GO:0003676//nucleic acid binding	GO:0006351//transcription, DNA-templated	NA	K08773//RalA-binding protein 1;K09241//transcriptional regulatory protein GAL4;K03380//phenol 2-monooxygenase [EC:1.14.13.7]	gi|83774604|dbj|BAE64727.1|//unnamed protein product [Aspergillus oryzae RIB40];gi|914753444|gb|KOC07609.1|//hypothetical protein AFLA70_211g001871 [Aspergillus flavus AF70]
AO090001000582	1581	2.39179	25.9376	3.43888	5.58964e-07	Up	2.54552e-07	NA	NA	GO:0000272//polysaccharide catabolic process	NA	K09252//feruloyl esterase [EC:3.1.1.73]	gi|169769242|ref|XP_001819091.1|//feruloyl esterase B-1 [Aspergillus oryzae RIB40]
AO090026000126	732	7.0501	76.2343	3.43473	5.74116e-19	Up	1.72134e-19	NA	NA	NA	NA	NA	gi|169774309|ref|XP_001821622.1|//hypothetical protein AOR_1_242014 [Aspergillus oryzae RIB40]
AO090001000550	1440	529.137	5716.68	3.43346	0	Up	0	NA	GO:0016645//oxidoreductase activity, acting on the CH-NH group of donors	GO:0006536//glutamate metabolic process;GO:0006560//proline metabolic process	Amino acid transport and metabolism ;	K00318//proline dehydrogenase [EC:1.5.-.-];K14454//aspartate aminotransferase, cytoplasmic [EC:2.6.1.1];K00286//pyrroline-5-carboxylate reductase [EC:1.5.1.2]	gi|169769182|ref|XP_001819061.1|//proline oxidase Put1 [Aspergillus oryzae RIB40]
AO090038000491	1365	218.331	2358.38	3.43321	0	Up	0	NA	GO:0005488//binding	NA	General function prediction only ;	K14640//solute carrier family 20 (sodium-dependent phosphate transporter)	gi|169781890|ref|XP_001825408.1|//kinesin light chain [Aspergillus oryzae RIB40]
AO090026000507	837	111.508	1204.38	3.43307	4.11509e-212	Up	2.89416e-213	NA	NA	NA	NA	NA	gi|169774959|ref|XP_001821947.1|//hypothetical protein AOR_1_932014 [Aspergillus oryzae RIB40]
AO090011000014	1620	23.8961	258.02	3.43264	7.95599e-55	Up	1.33442e-55	NA	NA	GO:0071702//organic substance transport	Carbohydrate transport and metabolism ; Amino acid transport and metabolism ; Inorganic ion transport and metabolism ; General function prediction only ;	K08158//MFS transporter, DHA1 family, multidrug resistance protein;K08157//MFS transporter, DHA1 family, multidrug resistance protein	gi|169782498|ref|XP_001825711.1|//MFS multidrug transporter [Aspergillus oryzae RIB40]
AO090012000787	1035	322.504	3474.16	3.42928	0	Up	0	GO:0044464//cell part	NA	NA	Posttranslational modification, protein turnover, chaperones ;	K11293//protein HIRA/HIR1	gi|169763682|ref|XP_001727741.1|//stomatin family protein [Aspergillus oryzae RIB40]
AO090102000010	975	1.32087	14.2196	3.42832	0.000114398	Up	5.95209e-05	GO:0030312//external encapsulating structure	NA	GO:0045229//external encapsulating structure organization;GO:0071555//cell wall organization	Carbohydrate transport and metabolism ;	K01051//pectinesterase [EC:3.1.1.11]	gi|169775585|ref|XP_001822259.1|//pectinesterase A [Aspergillus oryzae RIB40]
AO090138000137	387	0.220479	2.3698	3.42605	0.0288835	Up	0.0187212	NA	NA	NA	NA	NA	gi|83774385|dbj|BAE64509.1|//unnamed protein product [Aspergillus oryzae RIB40]
AO090023000024	330	0.220252	2.36341	3.42364	0.0290261	Up	0.018819	NA	NA	NA	NA	NA	gi|169772293|ref|XP_001820615.1|//hypothetical protein AOR_1_36144 [Aspergillus oryzae RIB40]
AO090010000485	888	2.18482	23.4365	3.42317	1.51787e-06	Up	7.06605e-07	NA	NA	NA	NA	NA	gi|169786017|ref|XP_001827469.1|//hypothetical protein AOR_1_800024 [Aspergillus oryzae RIB40]
AO090308000022	1428	0.219886	2.35323	3.41981	0.029251	Up	0.0189756	NA	GO:0016209//antioxidant activity	NA	Inorganic ion transport and metabolism ;	NA	gi|169768195|ref|XP_001818568.1|//dyp-type peroxidase family protein [Aspergillus oryzae RIB40]
AO090701000225	786	530.08	5669.11	3.41884	0	Up	0	NA	NA	NA	Energy production and conversion ;	K03521//electron transfer flavoprotein beta subunit	gi|169777259|ref|XP_001823095.1|//electron transfer flavoprotein subunit beta [Aspergillus oryzae RIB40]
AO090026000183	711	131.614	1403.47	3.41461	4.74788e-288	Up	2.57434e-289	NA	NA	NA	General function prediction only ;	K06966//uncharacterized protein	gi|169774409|ref|XP_001821672.1|//lysine decarboxylase-like protein [Aspergillus oryzae RIB40]
AO090020000665	741	66.5052	708.862	3.41397	1.50216e-159	Up	1.26528e-160	NA	NA	NA	NA	NA	gi|169780958|ref|XP_001824943.1|//hypothetical protein AOR_1_1150084 [Aspergillus oryzae RIB40]
AO090103000487	732	0.46029	4.89512	3.41073	0.0108252	Up	0.00664581	NA	NA	NA	NA	NA	gi|169785154|ref|XP_001827038.1|//hypothetical protein AOR_1_798034 [Aspergillus oryzae RIB40]
AO090701000494	963	0.223638	2.37719	3.41002	0.0299319	Up	0.0194338	NA	GO:0003824//catalytic activity	GO:0008152//metabolic process	Lipid transport and metabolism ; Secondary metabolites biosynthesis, transport and catabolism ; General function prediction only ;	NA	gi|83772069|dbj|BAE62199.1|//unnamed protein product [Aspergillus oryzae RIB40]
AO090005000521	1509	0.223638	2.37719	3.41002	0.0299319	Up	0.0194338	NA	GO:0016627//oxidoreductase activity, acting on the CH-CH group of donors;GO:0050662//coenzyme binding	GO:0008152//metabolic process	Lipid transport and metabolism ;	K15389//acyl-CoA dehydrogenase	gi|83765430|dbj|BAE55573.1|//unnamed protein product [Aspergillus oryzae RIB40]
AO090012000585	777	398.375	4231.38	3.40893	0	Up	0	GO:0044464//cell part	GO:0046914//transition metal ion binding	NA	NA	K09191//general transcription factor IIIA	gi|169763356|ref|XP_001727578.1|//C2H2 transcription factor [Aspergillus oryzae RIB40]
AO090023000106	768	116.459	1233.88	3.40531	6.19369e-266	Up	3.50651e-267	NA	NA	NA	Transcription ;	K03506//DNA polymerase epsilon subunit 4 [EC:2.7.7.7];K08066//nuclear transcription factor Y, gamma	gi|169772437|ref|XP_001820687.1|//CBF/NF-Y family transcription factor [Aspergillus oryzae RIB40]
AO090003000277	774	8.32184	87.5752	3.39555	1.7312e-19	Up	5.12364e-20	NA	GO:0003824//catalytic activity	GO:0008152//metabolic process	Lipid transport and metabolism ; Secondary metabolites biosynthesis, transport and catabolism ; General function prediction only ;	K00065//2-deoxy-D-gluconate 3-dehydrogenase [EC:1.1.1.125]	gi|169770027|ref|XP_001819483.1|//2-dehydro-3-deoxy-D-gluconate 5-dehydrogenase [Aspergillus oryzae RIB40]
AO090701000432	2739	23.4475	246.338	3.39314	2.09506e-50	Up	3.67788e-51	GO:0016021//integral component of membrane	NA	NA	NA	K19849//signaling mucin MSB2	gi|83772013|dbj|BAE62143.1|//unnamed protein product [Aspergillus oryzae RIB40];gi|391871520|gb|EIT80680.1|//hypothetical protein Ao3042_03022 [Aspergillus oryzae 3.042]
AO090005000680	561	0.665314	6.97088	3.38923	0.00332702	Up	0.00193808	NA	NA	NA	Translation, ribosomal structure and biogenesis ;	K15067//2-aminomuconate deaminase [EC:3.5.99.5]	gi|914762893|gb|KOC16708.1|//L-PSP endoribonuclease family protein [Aspergillus flavus AF70]
AO090011000884	534	11.9666	124.501	3.37908	9.00218e-27	Up	2.25655e-27	NA	NA	NA	NA	K07192//flotillin	gi|83775198|dbj|BAE65321.1|//unnamed protein product [Aspergillus oryzae RIB40]
AO09M000000019	1059	0.667811	6.94553	3.37857	0.0037228	Up	0.00218063	GO:0043231//intracellular membrane-bounded organelle;GO:0031224//intrinsic component of membrane	GO:0050136//NADH dehydrogenase (quinone) activity	GO:0008152//metabolic process	Energy production and conversion ;	K03878//NADH-ubiquinone oxidoreductase chain 1 [EC:1.6.5.3]	gi|380702241|gb|AFD96010.1|//NADH dehydrogenase subunit 1 (mitochondrion) [Aspergillus oryzae]
AO090010000687	438	0.477065	4.96017	3.37813	0.0131158	Up	0.00813654	GO:0030313//cell envelope	GO:0015036//disulfide oxidoreductase activity	NA	Secondary metabolites biosynthesis, transport and catabolism ;	NA	gi|83776387|dbj|BAE66506.1|//unnamed protein product [Aspergillus oryzae RIB40]
AO090023000529	2035	6.39955	66.3184	3.37337	2.57432e-16	Up	8.32277e-17	NA	GO:0003824//catalytic activity	GO:0008152//metabolic process	Lipid transport and metabolism ; Secondary metabolites biosynthesis, transport and catabolism ;	K19951//TBC1 domain family member 8/9;K01897//long-chain acyl-CoA synthetase [EC:6.2.1.3]	gi|83768930|dbj|BAE59067.1|//unnamed protein product [Aspergillus oryzae RIB40];gi|317145787|ref|XP_001821069.2|//long-chain-fatty-acid-CoA ligase [Aspergillus oryzae RIB40]
AO090701000154	2941	37.4241	386.75	3.36936	1.34448e-83	Up	1.74882e-84	NA	GO:0051537//2 iron, 2 sulfur cluster binding;GO:0016708//oxidoreductase activity, acting on paired donors, with incorporation or reduction of molecular oxygen, NAD(P)H as one donor, and incorporation of two atoms of oxygen into one donor;GO:0005506//iron ion binding;GO:0003824//catalytic activity;GO:0051536//iron-sulfur cluster binding	GO:0019439//aromatic compound catabolic process;GO:0008152//metabolic process;GO:0055114//oxidation-reduction process	NA	NA	gi|317148964|ref|XP_001823033.2|//hypothetical protein AOR_1_290114 [Aspergillus oryzae RIB40];gi|83771770|dbj|BAE61900.1|//unnamed protein product [Aspergillus oryzae RIB40]
AO090038000027	2753	17.0593	175.967	3.36667	4.29959e-39	Up	8.80657e-40	NA	GO:0016614//oxidoreductase activity, acting on CH-OH group of donors;GO:0050660//flavin adenine dinucleotide binding;GO:0003824//catalytic activity;GO:0050662//coenzyme binding	GO:0008152//metabolic process;GO:0055114//oxidation-reduction process	Energy production and conversion ;	K01501//nitrilase [EC:3.5.5.1];K01166//ribonuclease T2 [EC:3.1.27.1]	gi|83773759|dbj|BAE63884.1|//unnamed protein product [Aspergillus oryzae RIB40];gi|914761479|gb|KOC15294.1|//FAD binding domain protein [Aspergillus flavus AF70]
AO090701000900	921	0.275309	2.81563	3.35433	0.0346519	Up	0.0226036	NA	GO:0016787//hydrolase activity	GO:0044238//primary metabolic process	NA	K18203//[phosphatase 2A protein]-leucine-carboxy methyltransferase [EC:2.1.1.233]	gi|83772417|dbj|BAE62547.1|//unnamed protein product [Aspergillus oryzae RIB40]
AO090009000510	2067	1.09199	11.0878	3.34394	0.000405974	Up	0.000219898	NA	NA	NA	NA	NA	gi|83764812|dbj|BAE54956.1|//unnamed protein product [Aspergillus oryzae RIB40]
AO090005001088	1581	45.1618	457.625	3.34099	2.19741e-12	Up	8.03675e-13	GO:0044424//intracellular part	GO:0032559//adenyl ribonucleotide binding;GO:0004812//aminoacyl-tRNA ligase activity	GO:0006418//tRNA aminoacylation for protein translation	Translation, ribosomal structure and biogenesis ;	K01868//threonyl-tRNA synthetase [EC:6.1.1.3]	gi|169767186|ref|XP_001818064.1|//threonyl-tRNA synthetase [Aspergillus oryzae RIB40]
AO090701000324	1917	28.059	284.181	3.34027	8.14864e-59	Up	1.30822e-59	NA	GO:0003824//catalytic activity	NA	Lipid transport and metabolism ;	K11429//histone-lysine N-methyltransferase SUV420H [EC:2.1.1.43];K01050//cholinesterase [EC:3.1.1.8];K01046//triacylglycerol lipase [EC:3.1.1.3];K02332//DNA polymerase gamma 1 [EC:2.7.7.7]	gi|83771921|dbj|BAE62051.1|//unnamed protein product [Aspergillus oryzae RIB40]
AO090012000395	990	16.82	169.977	3.33709	2.31406e-37	Up	4.87821e-38	NA	GO:0003824//catalytic activity	NA	General function prediction only ;	K08726//soluble epoxide hydrolase / lipid-phosphate phosphatase [EC:3.3.2.10 3.1.3.76];K01253//microsomal epoxide hydrolase [EC:3.3.2.9];K14544//U3 small nucleolar RNA-associated protein 22	gi|169763034|ref|XP_001727417.1|//epoxide hydrolase [Aspergillus oryzae RIB40]
AO090103000205	345	5.34992	54.0383	3.33639	1.1655e-13	Up	4.07274e-14	NA	NA	NA	NA	NA	gi|914763268|gb|KOC17083.1|//hypothetical protein AFLA70_238g001811 [Aspergillus flavus AF70]
AO090102000484	4176	320.239	3229.39	3.33404	0	Up	0	NA	GO:0046872//metal ion binding	NA	NA	K02365//separase [EC:3.4.22.49];K09248//proline utilization trans-activator;K01426//amidase [EC:3.5.1.4]	gi|83771385|dbj|BAE61517.1|//unnamed protein product [Aspergillus oryzae RIB40];gi|317148259|ref|XP_001822650.2|//fungal specific transcription factor domain protein [Aspergillus oryzae RIB40]
AO090023000069	1029	4.07007	40.9986	3.33245	1.63792e-10	Up	6.41265e-11	NA	NA	NA	NA	NA	gi|83768518|dbj|BAE58655.1|//unnamed protein product [Aspergillus oryzae RIB40]
AO090003000761	861	85.2245	856.367	3.32889	6.61677e-182	Up	5.14089e-183	NA	GO:0019842//vitamin binding;GO:0046914//transition metal ion binding;GO:0016491//oxidoreductase activity	GO:0008152//metabolic process	NA	K00472//prolyl 4-hydroxylase [EC:1.14.11.2]	gi|83767763|dbj|BAE57902.1|//unnamed protein product [Aspergillus oryzae RIB40]
AO090113000051	731	11.0964	111.338	3.32678	1.73547e-24	Up	4.55316e-25	NA	NA	NA	NA	NA	gi|238500233|ref|XP_002381351.1|//conserved hypothetical protein [Aspergillus flavus NRRL3357]
AO090003001184	3073	55.2643	554.492	3.32675	8.41735e-120	Up	8.67073e-121	NA	GO:0016740//transferase activity;GO:0016747//transferase activity, transferring acyl groups other than amino-acyl groups	NA	NA	K19747//BAHD acyltransferase [EC:2.3.1.-];K19184//fumigaclavine B O-acetyltransferase [EC:2.3.1.205]	gi|169771603|ref|XP_001820271.1|//transferase family protein [Aspergillus oryzae RIB40]
AO090020000661	1398	10.4322	104.437	3.32352	9.53316e-24	Up	2.54937e-24	NA	NA	NA	NA	NA	gi|169780956|ref|XP_001824942.1|//protein rds1 [Aspergillus oryzae RIB40]
AO090103000220	1008	3.28305	32.832	3.32199	1.48684e-07	Up	6.56302e-08	NA	GO:0046914//transition metal ion binding;GO:0003824//catalytic activity	GO:0008152//metabolic process	Energy production and conversion ; General function prediction only ;	K15385//aspyridone synthetase trans-acting enoyl reductase;K11293//protein HIRA/HIR1	gi|83775559|dbj|BAE65679.1|//unnamed protein product [Aspergillus oryzae RIB40]
AO090120000234	1755	105.437	1054.1	3.32156	8.17335e-213	Up	5.73331e-214	GO:0031224//intrinsic component of membrane	NA	GO:0071702//organic substance transport	Carbohydrate transport and metabolism ; Amino acid transport and metabolism ; Inorganic ion transport and metabolism ; General function prediction only ;	K08176//MFS transporter, PHS family, inorganic phosphate transporter	gi|391869376|gb|EIT78575.1|//synaptic vesicle transporter SV2 [Aspergillus oryzae 3.042]
AO090010000443	1645	3759.5	37569.1	3.32094	0	Up	0	GO:0005737//cytoplasm	GO:0003872//6-phosphofructokinase activity;GO:0046872//metal ion binding;GO:0005524//ATP binding	GO:0006002//fructose 6-phosphate metabolic process;GO:0061615//glycolytic process through fructose-6-phosphate	NA	K00850//6-phosphofructokinase 1 [EC:2.7.1.11]	gi|238506869|ref|XP_002384636.1|//conserved hypothetical protein [Aspergillus flavus NRRL3357]
AO090010000648	912	3.86894	38.585	3.31803	5.14502e-10	Up	2.05649e-10	NA	NA	NA	NA	NA	gi|83776358|dbj|BAE66477.1|//unnamed protein product [Aspergillus oryzae RIB40];gi|317159186|ref|XP_001827610.2|//hypothetical protein AOR_1_1084024 [Aspergillus oryzae RIB40]
AO090009000356	2586	70.7633	705.37	3.31731	6.66942e-155	Up	5.70366e-156	NA	GO:0015926//glucosidase activity	GO:0009251//glucan catabolic process	Carbohydrate transport and metabolism ;	K05349//beta-glucosidase [EC:3.2.1.21]	gi|169764719|ref|XP_001816831.1|//beta-glucosidase A [Aspergillus oryzae RIB40]
AO090103000153	1884	3.65315	36.3988	3.31668	4.02905e-09	Up	1.66495e-09	NA	GO:0004180//carboxypeptidase activity	GO:0019538//protein metabolic process	Amino acid transport and metabolism ;	K01288//carboxypeptidase D [EC:3.4.16.6]	gi|83775499|dbj|BAE65619.1|//unnamed protein product [Aspergillus oryzae RIB40]
AO090113000042	1779	12.8379	127.704	3.31433	7.69907e-27	Up	1.92353e-27	GO:0016020//membrane	GO:0022857//transmembrane transporter activity	GO:0006810//transport	Carbohydrate transport and metabolism ; Amino acid transport and metabolism ; Inorganic ion transport and metabolism ; General function prediction only ;	K08150//MFS transporter, SP family, solute carrier family 2 (myo-inositol transporter), member 13	gi|83772976|dbj|BAE63104.1|//unnamed protein product [Aspergillus oryzae RIB40];gi|358369228|dbj|GAA85843.1|//MFS sugar transporter [Aspergillus kawachii IFO 4308]
AO090308000009	1291	14.4892	143.765	3.31067	4.99837e-32	Up	1.15262e-32	NA	GO:0016787//hydrolase activity;GO:0003824//catalytic activity	NA	Posttranslational modification, protein turnover, chaperones ;	NA	gi|83766415|dbj|BAE56557.1|//unnamed protein product [Aspergillus oryzae RIB40];gi|317141396|ref|XP_001818559.2|//ADP-ribosylglycohydrolase [Aspergillus oryzae RIB40]
AO090010000640	1710	1.12133	11.1043	3.30783	0.000842686	Up	0.000467306	NA	NA	NA	Amino acid transport and metabolism ;	NA	gi|83776350|dbj|BAE66469.1|//unnamed protein product [Aspergillus oryzae RIB40]
AO090138000056	1342	268.397	2655.44	3.30651	0	Up	0	NA	NA	NA	Cell cycle control, cell division, chromosome partitioning ;	K01183//chitinase [EC:3.2.1.14]	gi|914759530|gb|KOC13373.1|//extracellular proline-rich protein [Aspergillus flavus AF70];gi|83774314|dbj|BAE64438.1|//unnamed protein product [Aspergillus oryzae RIB40]
AO090009000138	1257	132.153	1307.31	3.30633	7.01727e-278	Up	3.90171e-279	NA	NA	GO:0006810//transport	Carbohydrate transport and metabolism ;	K17866//diphthamide biosynthesis protein 2;K11231//osomolarity two-component system, sensor histidine kinase SLN1 [EC:2.7.13.3];K00276//primary-amine oxidase [EC:1.4.3.21];K02835//peptide chain release factor 1	gi|169764347|ref|XP_001816645.1|//MFS monocarboxylate transporter [Aspergillus oryzae RIB40]
AO090003000902	330	5.57449	55.1245	3.30578	2.76549e-13	Up	9.78093e-14	NA	NA	NA	NA	K07566//L-threonylcarbamoyladenylate synthase [EC:2.7.7.87]	gi|169771103|ref|XP_001820021.1|//hypothetical protein AOR_1_1590154 [Aspergillus oryzae RIB40]
AO090012000327	624	0.447337	4.41536	3.3031	0.0141853	Up	0.00882875	NA	NA	NA	NA	NA	gi|83770390|dbj|BAE60523.1|//unnamed protein product [Aspergillus oryzae RIB40]
AO090009000400	1122	9.05056	89.2926	3.30246	0.00195268	Up	0.00111556	GO:0043231//intracellular membrane-bounded organelle;GO:0031224//intrinsic component of membrane;GO:0031090//organelle membrane	NA	GO:0071702//organic substance transport	Carbohydrate transport and metabolism ; Amino acid transport and metabolism ; General function prediction only ;	K15275//solute carrier family 35 (UDP-galactose transporter), member B1	gi|83764723|dbj|BAE54867.1|//unnamed protein product [Aspergillus oryzae RIB40]
AO090120000126	804	64.0449	631.487	3.3016	9.97088e-130	Up	9.7203e-131	NA	NA	NA	NA	K00860//adenylylsulfate kinase [EC:2.7.1.25];K11843//ubiquitin carboxyl-terminal hydrolase 14 [EC:3.4.19.12]	gi|169778837|ref|XP_001823883.1|//thioesterase family protein [Aspergillus oryzae RIB40]
AO09M000000012	225	0.236554	2.326	3.29762	0.0379363	Up	0.0248439	GO:0044424//intracellular part;GO:0044425//membrane part	NA	GO:0015992//proton transport	Energy production and conversion ;	K02128//F-type H+-transporting ATPase subunit c	gi|380702293|gb|AFD96059.1|//ATP synthase subunit 9 (mitochondrion) [Aspergillus terreus]
AO090001000289	4028	1186.54	11655.3	3.29616	0	Up	0	NA	GO:0008168//methyltransferase activity;GO:0016491//oxidoreductase activity	GO:0006730//one-carbon metabolic process;GO:0055114//oxidation-reduction process	NA	K17649//demethylsterigmatocystin 6-O-methyltransferase [EC:2.1.1.109]	gi|169768716|ref|XP_001818828.1|//O-methyltransferase B [Aspergillus oryzae RIB40] ;gi|83766687|dbj|BAE56827.1|//unnamed protein product [Aspergillus oryzae RIB40]
AO090166000061	1683	0.236337	2.31961	3.29496	0.0381135	Up	0.0249775	NA	GO:0070011//peptidase activity, acting on L-amino acid peptides;GO:0030246//carbohydrate binding;GO:0046914//transition metal ion binding	GO:0019538//protein metabolic process;GO:0009987//cellular process	NA	NA	gi|169776758|ref|XP_001822845.1|//hypothetical protein AOR_1_78124 [Aspergillus oryzae RIB40]
AO090005000220	1593	0.236337	2.31961	3.29496	0.0381135	Up	0.0249775	NA	GO:0005506//iron ion binding;GO:0004497//monooxygenase activity	GO:0008152//metabolic process	Secondary metabolites biosynthesis, transport and catabolism ;	K15388//cytochrome P450 monooxygenase;K00493//unspecific monooxygenase [EC:1.14.14.1]	gi|169765686|ref|XP_001817314.1|//cytochrome P450 52A13 [Aspergillus oryzae RIB40]
AO090001000452	912	7.28747	71.494	3.29433	0.0225836	Up	0.0144237	GO:0031224//intrinsic component of membrane;GO:0009274//peptidoglycan-based cell wall	GO:0016824//hydrolase activity, acting on acid halide bonds	GO:0000097//sulfur amino acid biosynthetic process	NA	K01560//2-haloacid dehalogenase [EC:3.8.1.2]	gi|83766830|dbj|BAE56970.1|//unnamed protein product [Aspergillus oryzae RIB40]
AO090038000029	441	71.6551	699.044	3.28624	1.24111e-148	Up	1.0991e-149	NA	NA	NA	Function unknown ;	K01607//4-carboxymuconolactone decarboxylase [EC:4.1.1.44]	gi|169781112|ref|XP_001825019.1|//4-carboxymuconolactone decarboxylase [Aspergillus oryzae RIB40]
AO090011000520	1540	4.37553	42.4699	3.27891	9.41102e-09	Up	3.94703e-09	NA	GO:0003824//catalytic activity	GO:0009116//nucleoside metabolic process;GO:0055086//nucleobase-containing small molecule metabolic process	Nucleotide transport and metabolism ;	K19626//inversin;K10380//ankyrin;K15110//solute carrier family 25 (mitochondrial 2-oxodicarboxylate transporter), member 21;K06694//26S proteasome non-ATPase regulatory subunit 10;K16261//yeast amino acid transporter;K02155//V-type H+-transporting ATPase 16kDa proteolipid subunit	gi|317156973|ref|XP_003190787.1|//hypothetical protein AOR_1_886054 [Aspergillus oryzae RIB40];gi|83774888|dbj|BAE65011.1|//unnamed protein product [Aspergillus oryzae RIB40]
AO090023000687	999	96.2179	933.588	3.27841	5.01747e-201	Up	3.67662e-202	NA	GO:0019842//vitamin binding;GO:0046914//transition metal ion binding;GO:0016491//oxidoreductase activity	GO:0008152//metabolic process	NA	NA	gi|83769066|dbj|BAE59203.1|//unnamed protein product [Aspergillus oryzae RIB40]
AO090120000180	2854	35.9901	349.088	3.27792	4.85957e-70	Up	7.10392e-71	NA	GO:0016884//carbon-nitrogen ligase activity, with glutamine as amido-N-donor	GO:0006528//asparagine metabolic process	Amino acid transport and metabolism ;	K01953//asparagine synthase (glutamine-hydrolysing) [EC:6.3.5.4]	gi|83772666|dbj|BAE62794.1|//unnamed protein product [Aspergillus oryzae RIB40];gi|317150284|ref|XP_001823927.2|//asparagine synthetase [Aspergillus oryzae RIB40]
AO090009000577	1006	1.30744	12.6679	3.27636	0.000229578	Up	0.000122006	NA	NA	NA	NA	NA	gi|83764868|dbj|BAE55012.1|//unnamed protein product [Aspergillus oryzae RIB40];gi|914758509|gb|KOC12465.1|//integral membrane protein [Aspergillus flavus AF70]
AO090026000501	420	9.8307	95.1005	3.27409	0.000484442	Up	0.000263961	NA	NA	NA	NA	NA	gi|238496421|ref|XP_002379446.1|//conserved hypothetical protein [Aspergillus flavus NRRL3357]
AO090102000053	1707	1.95552	18.9031	3.27299	1.11866e-05	Up	5.45891e-06	NA	GO:0016787//hydrolase activity;GO:0016747//transferase activity, transferring acyl groups other than amino-acyl groups	NA	General function prediction only ;	K00698//chitin synthase [EC:2.4.1.16];K08329//autophagy-related protein 17	gi|169775661|ref|XP_001822297.1|//hypothetical protein AOR_1_90134 [Aspergillus oryzae RIB40]
AO090023000648	1002	78.8562	761.586	3.27171	5.26311e-121	Up	5.38278e-122	NA	GO:0016772//transferase activity, transferring phosphorus-containing groups	NA	Lipid transport and metabolism ;	K00902//dolichol kinase [EC:2.7.1.108]	gi|83769032|dbj|BAE59169.1|//unnamed protein product [Aspergillus oryzae RIB40]
AO090012000742	525	0.454587	4.38828	3.27103	0.0162692	Up	0.0101947	NA	NA	NA	NA	NA	gi|169763612|ref|XP_001727706.1|//hypothetical protein AOR_1_1294194 [Aspergillus oryzae RIB40]
AO090001000604	1692	2.8063	27.0524	3.26902	3.75814e-07	Up	1.69761e-07	GO:0031224//intrinsic component of membrane	GO:0008422//beta-glucosidase activity;GO:0043167//ion binding	GO:0045229//external encapsulating structure organization;GO:0005976//polysaccharide metabolic process	Carbohydrate transport and metabolism ;	K01210//glucan 1,3-beta-glucosidase [EC:3.2.1.58]	gi|83766968|dbj|BAE57108.1|//unnamed protein product [Aspergillus oryzae RIB40]
AO090102000016	1164	411.968	3969.17	3.26823	0	Up	0	NA	NA	NA	NA	NA	gi|83771000|dbj|BAE61132.1|//unnamed protein product [Aspergillus oryzae RIB40]
AO090003000614	5050	320.855	3086.66	3.26605	0	Up	0	GO:0031224//intrinsic component of membrane;GO:0016021//integral component of membrane	GO:0046873//metal ion transmembrane transporter activity;GO:0046872//metal ion binding;GO:0005524//ATP binding;GO:0032559//adenyl ribonucleotide binding;GO:0019829//cation-transporting ATPase activity;GO:0005388//calcium-transporting ATPase activity	GO:0070588//calcium ion transmembrane transport;GO:0009206//purine ribonucleoside triphosphate biosynthetic process;GO:0006816//calcium ion transport	Inorganic ion transport and metabolism ;	K01537//Ca2+-transporting ATPase [EC:3.6.3.8]	gi|83767637|dbj|BAE57776.1|//unnamed protein product [Aspergillus oryzae RIB40];gi|391867484|gb|EIT76730.1|//calcium transporting ATPase [Aspergillus oryzae 3.042]
AO090009000513	5882	127.667	1225.62	3.26306	2.43801e-247	Up	1.49023e-248	NA	GO:0016705//oxidoreductase activity, acting on paired donors, with incorporation or reduction of molecular oxygen;GO:0004497//monooxygenase activity;GO:0016491//oxidoreductase activity	GO:0055114//oxidation-reduction process	Energy production and conversion ;	K04091//alkanesulfonate monooxygenase [EC:1.14.14.5];K05747//Wiskott-Aldrich syndrome protein	gi|966761781|dbj|GAQ45621.1|//HK97 family phage prohead protease [Aspergillus niger];gi|169764977|ref|XP_001816960.1|//xenobiotic compound monooxygenase, DszA family [Aspergillus oryzae RIB40]
AO090005000042	792	0.458707	4.38596	3.25725	0.0166648	Up	0.0104533	NA	NA	NA	NA	NA	gi|169765386|ref|XP_001817164.1|//hypothetical protein AOR_1_72174 [Aspergillus oryzae RIB40]
AO090020000389	1551	5.9863	57.0615	3.25278	3.93324e-14	Up	1.35055e-14	NA	GO:0004601//peroxidase activity;GO:0005506//iron ion binding	GO:0042743//hydrogen peroxide metabolic process;GO:0006950//response to stress	Inorganic ion transport and metabolism ;	K03781//catalase [EC:1.11.1.6]	gi|391872044|gb|EIT81187.1|//catalase [Aspergillus oryzae 3.042]
AO090701000645	1686	54.5775	519.752	3.25145	1.37069e-111	Up	1.47378e-112	NA	NA	GO:0006810//transport	Carbohydrate transport and metabolism ; Amino acid transport and metabolism ; Inorganic ion transport and metabolism ; General function prediction only ;	K08157//MFS transporter, DHA1 family, multidrug resistance protein	gi|169777989|ref|XP_001823460.1|//polyamine transporter [Aspergillus oryzae RIB40]
AO090005000940	1488	3.01657	28.7252	3.25133	7.47663e-08	Up	3.261e-08	NA	NA	GO:0006810//transport	NA	K14709//solute carrier family 39 (zinc transporter), member 1/2/3	gi|83765798|dbj|BAE55941.1|//unnamed protein product [Aspergillus oryzae RIB40]
AO090023000570	675	567.94	5404.44	3.25033	0	Up	0	NA	NA	NA	Posttranslational modification, protein turnover, chaperones ;	K03233//elongation factor 1-gamma	gi|169773273|ref|XP_001821105.1|//translation elongation factor eEF-1B gamma subunit [Aspergillus oryzae RIB40]
AO090023000181	1164	217.692	2065.94	3.24644	0	Up	0	NA	NA	NA	NA	NA	gi|169772575|ref|XP_001820756.1|//hypothetical protein AOR_1_306144 [Aspergillus oryzae RIB40]
AO090038000115	1050	0.900252	8.54041	3.24591	0.00276002	Up	0.00159864	NA	GO:0046914//transition metal ion binding;GO:0003824//catalytic activity	GO:0008152//metabolic process	Energy production and conversion ; General function prediction only ;	K13953//alcohol dehydrogenase, propanol-preferring [EC:1.1.1.1];K15385//aspyridone synthetase trans-acting enoyl reductase;K00344//NADPH2:quinone reductase [EC:1.6.5.5]	gi|169781252|ref|XP_001825089.1|//alcohol dehydrogenase [Aspergillus oryzae RIB40]
AO090011000357	1773	308.933	2922.91	3.24204	0	Up	0	NA	GO:0016879//ligase activity, forming carbon-nitrogen bonds	NA	Translation, ribosomal structure and biogenesis ;	K01426//amidase [EC:3.5.1.4]	gi|169783086|ref|XP_001826005.1|//amidase [Aspergillus oryzae RIB40]
AO090005000545	1257	2.39153	22.5492	3.23707	3.84166e-06	Up	1.82269e-06	NA	GO:0046914//transition metal ion binding;GO:0003824//catalytic activity;GO:0051536//iron-sulfur cluster binding	GO:0044237//cellular metabolic process	Inorganic ion transport and metabolism ; General function prediction only ;	NA	gi|169766248|ref|XP_001817595.1|//Rieske 2Fe-2S family protein [Aspergillus oryzae RIB40]
AO090003001484	576	294.59	2752.01	3.22371	0	Up	0	NA	NA	NA	NA	NA	gi|169772123|ref|XP_001820531.1|//cell wall protein PhiA [Aspergillus oryzae RIB40]
AO090003001146	714	257.86	2393.2	3.21428	0	Up	0	NA	GO:0051540//metal cluster binding	GO:0031163//metallo-sulfur cluster assembly	Function unknown ;	K13628//iron-sulfur cluster assembly protein	gi|914757439|gb|KOC11538.1|//iron-sulfur cluster assembly accessory protein [Aspergillus flavus AF70]
AO090103000276	1287	6.4285	59.5294	3.21105	9.86812e-14	Up	3.43745e-14	NA	GO:0016491//oxidoreductase activity	GO:0008152//metabolic process	Coenzyme transport and metabolism ; Energy production and conversion ;	K00480//salicylate hydroxylase [EC:1.14.13.1]	gi|169784792|ref|XP_001826857.1|//FAD binding domain protein [Aspergillus oryzae RIB40]
AO090138000024	4292	206.525	1911.84	3.21057	0	Up	0	GO:0044464//cell part;GO:0005622//intracellular	GO:0000155//phosphorelay sensor kinase activity;GO:0032559//adenyl ribonucleotide binding;GO:0004871//signal transducer activity;GO:0004673//protein histidine kinase activity	GO:0023014//signal transduction by protein phosphorylation;GO:0007165//signal transduction;GO:0000160//phosphorelay signal transduction system;GO:0006468//protein phosphorylation;GO:0006351//transcription, DNA-templated	Signal transduction mechanisms ;	K19691//osomolarity two-component system, sensor histidine kinase NIK1 [EC:2.7.13.3];K20168//TBC1 domain family member 15;K11233//osomolarity two-component system, response regulator SSK1;K19692//osomolarity two-component system, sensor histidine kinase TcsA [EC:2.7.13.3]	gi|83774285|dbj|BAE64409.1|//unnamed protein product [Aspergillus oryzae RIB40];gi|914757136|gb|KOC11273.1|//sensor histidine kinase/response regulator [Aspergillus flavus AF70]
AO090023000182	651	1.31125	12.1217	3.20858	0.000379738	Up	0.000205058	NA	NA	NA	NA	NA	gi|83768618|dbj|BAE58755.1|//unnamed protein product [Aspergillus oryzae RIB40]
AO090038000541	2693	177.776	1642.1	3.20741	0	Up	0	NA	GO:0016829//lyase activity;GO:0016833//oxo-acid-lyase activity	GO:0008152//metabolic process	Amino acid transport and metabolism ;	K01640//hydroxymethylglutaryl-CoA lyase [EC:4.1.3.4]	gi|238498812|ref|XP_002380641.1|//3-hydroxymethyl-3-methylglutaryl-Coenzyme A lyase, putative [Aspergillus flavus NRRL3357];gi|83774187|dbj|BAE64312.1|//unnamed protein product [Aspergillus oryzae RIB40]
AO090005001355	1693	450.098	4145.9	3.20338	0	Up	0	NA	GO:0016670//oxidoreductase activity, acting on a sulfur group of donors, oxygen as acceptor;GO:0016972//thiol oxidase activity	GO:0008152//metabolic process;GO:0055114//oxidation-reduction process	NA	K17783//mitochondrial FAD-linked sulfhydryl oxidase [EC:1.8.3.2]	gi|317140599|ref|XP_001818284.2|//FAD dependent sulfhydryl oxidase Erv1 [Aspergillus oryzae RIB40] ;gi|770304788|gb|KJK62718.1|//ERV1 like protein [Aspergillus parasiticus SU-1]
AO090010000142	1758	7.06475	64.7461	3.19608	4.38095e-15	Up	1.46556e-15	NA	NA	GO:0006810//transport	Carbohydrate transport and metabolism ; Amino acid transport and metabolism ; Inorganic ion transport and metabolism ; General function prediction only ;	K01952//phosphoribosylformylglycinamidine synthase [EC:6.3.5.3];K16066//3-hydroxy acid dehydrogenase / malonic semialdehyde reductase [EC:1.1.1.381 1.1.1.-];K13095//splicing factor 1;K10866//DNA repair protein RAD50 [EC:3.6.-.-];K14708//solute carrier family 26 (sodium-independent sulfate anion transporter), member 11	gi|83775930|dbj|BAE66049.1|//unnamed protein product [Aspergillus oryzae RIB40]
AO090103000177	2104	14.7738	135.188	3.19386	1.17576e-26	Up	2.94941e-27	GO:0031224//intrinsic component of membrane;GO:0016021//integral component of membrane	GO:0005267//potassium channel activity;GO:0005261//cation channel activity	GO:0034220//ion transmembrane transport;GO:0071805//potassium ion transmembrane transport;GO:0030001//metal ion transport	Inorganic ion transport and metabolism ;	K05389//potassium channel subfamily K, other eukaryote	gi|238508184|ref|XP_002385293.1|//potassium channel, putative [Aspergillus flavus NRRL3357];gi|83775519|dbj|BAE65639.1|//unnamed protein product [Aspergillus oryzae RIB40]
AO090102000012	540	0.48401	4.41216	3.18838	0.0223297	Up	0.0142492	NA	GO:0005488//binding	GO:0008152//metabolic process	NA	NA	gi|83770996|dbj|BAE61128.1|//unnamed protein product [Aspergillus oryzae RIB40]
AO090012000995	1926	6536.07	59449.6	3.18517	0	Up	0	NA	GO:0032559//adenyl ribonucleotide binding	GO:0050896//response to stimulus	Posttranslational modification, protein turnover, chaperones ;	K03283//heat shock 70kDa protein 1/8	gi|169764054|ref|XP_001727927.1|//heat shock protein [Aspergillus oryzae RIB40]
AO090023000406	483	0.888569	8.05178	3.17975	0.00330635	Up	0.00192573	GO:0031224//intrinsic component of membrane;GO:0019867//outer membrane	NA	NA	NA	K09252//feruloyl esterase [EC:3.1.1.73]	gi|169772977|ref|XP_001820957.1|//hypothetical protein AOR_1_694144 [Aspergillus oryzae RIB40]
AO090005000672	2103	8.12264	73.551	3.17872	4.72326e-17	Up	1.49833e-17	NA	GO:0016878//acid-thiol ligase activity	GO:0044238//primary metabolic process	Lipid transport and metabolism ;	K01907//acetoacetyl-CoA synthetase [EC:6.2.1.16]	gi|169766476|ref|XP_001817709.1|//acetoacetyl-CoA synthase [Aspergillus oryzae RIB40]
AO090012000463	1069	112.804	1019.9	3.17653	4.92537e-179	Up	3.8857e-180	GO:0016021//integral component of membrane	NA	NA	NA	K01183//chitinase [EC:3.2.1.14]	gi|83770505|dbj|BAE60638.1|//unnamed protein product [Aspergillus oryzae RIB40];gi|317137864|ref|XP_001727477.2|//F-box domain protein [Aspergillus oryzae RIB40]
AO090003001096	636	758.624	6851.53	3.17497	0	Up	0	NA	GO:0016836//hydro-lyase activity;GO:0046914//transition metal ion binding	NA	Inorganic ion transport and metabolism ;	K01673//carbonic anhydrase [EC:4.2.1.1]	gi|83768052|dbj|BAE58191.1|//unnamed protein product [Aspergillus oryzae RIB40]
AO090138000005	885	28.9171	261.083	3.17451	1.88591e-54	Up	3.17878e-55	NA	GO:0003824//catalytic activity	GO:0008152//metabolic process	General function prediction only ;	K19654//2-dehydropantolactone reductase [EC:1.1.1.358];K18097//glycerol 2-dehydrogenase (NADP+) [EC:1.1.1.156]	gi|391866968|gb|EIT76233.1|//aldo/keto reductase family protein [Aspergillus oryzae 3.042]
AO090023000599	471	1262.43	11397.4	3.17443	0	Up	0	GO:0044425//membrane part	NA	GO:0015992//proton transport	Energy production and conversion ;	K02128//F-type H+-transporting ATPase subunit c	gi|169773321|ref|XP_001821129.1|//ATP synthase subunit 9 [Aspergillus oryzae RIB40]
AO090138000172	2588	33.6627	303.652	3.17319	2.43154e-55	Up	4.05593e-56	NA	GO:0016787//hydrolase activity	NA	NA	K08254//glucan endo-1,3-alpha-glucosidase [EC:3.2.1.59]	gi|914757351|gb|KOC11454.1|//putative glucan endo-1,3-alpha-glucosidase agn1 precursor [Aspergillus flavus AF70];gi|83774418|dbj|BAE64542.1|//unnamed protein product [Aspergillus oryzae RIB40]
AO090701000644	921	334.79	3019.13	3.1728	0	Up	0	NA	NA	GO:0006629//lipid metabolic process	Lipid transport and metabolism ;	K01046//triacylglycerol lipase [EC:3.1.1.3];K21016//feruloyl esterase [EC:3.1.1.73]	gi|169777987|ref|XP_001823459.1|//mono- and diacylglycerol lipase [Aspergillus oryzae RIB40]
AO090103000406	1299	799.012	7180.7	3.16784	0	Up	0	NA	GO:0016746//transferase activity, transferring acyl groups	NA	Lipid transport and metabolism ;	K00626//acetyl-CoA C-acetyltransferase [EC:2.3.1.9]	gi|169785018|ref|XP_001826970.1|//acetyl-CoA acetyltransferase IA [Aspergillus oryzae RIB40]
AO090023000122	1342	5.99584	53.8309	3.1664	2.44422e-12	Up	8.96418e-13	NA	GO:0016787//hydrolase activity;GO:0003824//catalytic activity	NA	General function prediction only ;	NA	gi|914758232|gb|KOC12210.1|//putative alpha/beta hydrolase [Aspergillus flavus AF70];gi|83768563|dbj|BAE58700.1|//unnamed protein product [Aspergillus oryzae RIB40]
AO090023000363	1038	1.52367	13.6709	3.16549	0.000175166	Up	9.22352e-05	NA	NA	NA	NA	NA	gi|169772907|ref|XP_001820922.1|//hypothetical protein AOR_1_626144 [Aspergillus oryzae RIB40]
AO090038000540	3544	186.85	1669.79	3.15972	0	Up	0	NA	GO:0016787//hydrolase activity	NA	Lipid transport and metabolism ;	K03927//carboxylesterase 2 [EC:3.1.1.1 3.1.1.84 3.1.1.56];K01050//cholinesterase [EC:3.1.1.8];K01049//acetylcholinesterase [EC:3.1.1.7];K01845//glutamate-1-semialdehyde 2,1-aminomutase [EC:5.4.3.8]	gi|169781962|ref|XP_001825444.1|//cholinesterase [Aspergillus oryzae RIB40]
AO090001000376	2073	290.949	2588.37	3.15321	0	Up	0	NA	GO:0016878//acid-thiol ligase activity	GO:0044238//primary metabolic process	Lipid transport and metabolism ;	K01907//acetoacetyl-CoA synthetase [EC:6.2.1.16]	gi|169768864|ref|XP_001818902.1|//acetoacetyl-coa synthetase [Aspergillus oryzae RIB40]
AO090020000615	921	2.58817	23.0131	3.15245	1.7341e-06	Up	8.09185e-07	NA	GO:0016289//CoA hydrolase activity	GO:0006732//coenzyme metabolic process	Lipid transport and metabolism ;	K11992//acyl-CoA thioesterase 8 [EC:3.1.2.27]	gi|169780880|ref|XP_001824904.1|//hypothetical protein AOR_1_1068084 [Aspergillus oryzae RIB40]
AO090012000343	1023	7.079	62.8302	3.14984	2.28876e-13	Up	8.08429e-14	NA	NA	NA	NA	K13690//alpha-1,3-mannosyltransferase [EC:2.4.1.-]	gi|83770403|dbj|BAE60536.1|//unnamed protein product [Aspergillus oryzae RIB40]
AO090026000801	990	11.0991	98.3361	3.14728	6.38231e-21	Up	1.8184e-21	NA	NA	NA	Translation, ribosomal structure and biogenesis ;	NA	gi|914755530|gb|KOC09695.1|//lysine-rich arabinogalactan protein [Aspergillus flavus AF70]
AO090038000462	1209	268.939	2379.9	3.14555	0	Up	0	NA	NA	NA	NA	K00728//dolichyl-phosphate-mannose-protein mannosyltransferase [EC:2.4.1.109]	gi|169781836|ref|XP_001825381.1|//hypothetical protein AOR_1_778074 [Aspergillus oryzae RIB40]
AO090023000351	1429	5.80665	51.2676	3.14227	1.49436e-11	Up	5.63875e-12	NA	NA	NA	NA	NA	gi|914763222|gb|KOC17037.1|//NmrA-like family protein [Aspergillus flavus AF70];gi|83768771|dbj|BAE58908.1|//unnamed protein product [Aspergillus oryzae RIB40]
AO090003000686	1767	355.544	3138.08	3.14178	0	Up	0	NA	NA	NA	General function prediction only ;	K04043//molecular chaperone DnaK	gi|83767694|dbj|BAE57833.1|//unnamed protein product [Aspergillus oryzae RIB40];gi|768708372|gb|KJJ34826.1|//hypothetical protein AFLA70_27g003780 [Aspergillus flavus AF70]
AO090308000011	408	0.677722	5.97136	3.1393	0.00995937	Up	0.00608032	NA	GO:0005506//iron ion binding;GO:0016491//oxidoreductase activity	NA	Secondary metabolites biosynthesis, transport and catabolism ;	K00480//salicylate hydroxylase [EC:1.14.13.1];K07824//benzoate 4-monooxygenase [EC:1.14.13.12]	gi|83766417|dbj|BAE56559.1|//unnamed protein product [Aspergillus oryzae RIB40]
AO090166000076	1827	42.2798	372.234	3.13817	1.23394e-71	Up	1.77656e-72	NA	GO:0046872//metal ion binding;GO:0019842//vitamin binding;GO:0050662//coenzyme binding;GO:0016744//transferase activity, transferring aldehyde or ketonic groups	GO:0008652//cellular amino acid biosynthetic process	Amino acid transport and metabolism ; Coenzyme transport and metabolism ;	K01652//acetolactate synthase I/II/III large subunit [EC:2.2.1.6]	gi|83771596|dbj|BAE61727.1|//unnamed protein product [Aspergillus oryzae RIB40]
AO090026000471	1614	155.948	1367.48	3.13239	2.03605e-215	Up	1.4076e-216	NA	GO:0005515//protein binding	NA	Posttranslational modification, protein turnover, chaperones ;	K03686//molecular chaperone DnaJ	gi|169774899|ref|XP_001821917.1|//chaperone dnaJ [Aspergillus oryzae RIB40]
AO090011000155	1377	18.1301	158.767	3.13045	2.94971e-32	Up	6.77214e-33	NA	NA	NA	Coenzyme transport and metabolism ;	NA	gi|169782748|ref|XP_001825836.1|//demethylmenaquinone methyltransferase family protein [Aspergillus oryzae RIB40]
AO090701000147	2214	593.927	5200.46	3.13028	0	Up	0	GO:0031224//intrinsic component of membrane;GO:0016021//integral component of membrane	GO:0022857//transmembrane transporter activity;GO:0022891//substrate-specific transmembrane transporter activity	GO:0055085//transmembrane transport;GO:0071702//organic substance transport	Carbohydrate transport and metabolism ; Amino acid transport and metabolism ; Inorganic ion transport and metabolism ; General function prediction only ;	K08150//MFS transporter, SP family, solute carrier family 2 (myo-inositol transporter), member 13	gi|83771765|dbj|BAE61895.1|//unnamed protein product [Aspergillus oryzae RIB40];gi|317148955|ref|XP_001823028.2|//MFS sugar transporter [Aspergillus oryzae RIB40]
AO090023000592	1047	52.4783	458.556	3.12731	1.54726e-94	Up	1.86162e-95	NA	GO:0046914//transition metal ion binding;GO:0003824//catalytic activity	GO:0008152//metabolic process	Energy production and conversion ; General function prediction only ;	K15385//aspyridone synthetase trans-acting enoyl reductase	gi|169773315|ref|XP_001821126.1|//protein TOXD [Aspergillus oryzae RIB40]
AO090012000977	741	41.6878	364.148	3.12683	1.12007e-72	Up	1.59509e-73	GO:0030313//cell envelope	GO:0015036//disulfide oxidoreductase activity	NA	Secondary metabolites biosynthesis, transport and catabolism ;	NA	gi|83770941|dbj|BAE61074.1|//unnamed protein product [Aspergillus oryzae RIB40]
AO090026000062	1032	0.685169	5.97447	3.12428	0.0110739	Up	0.00680664	NA	GO:0048037//cofactor binding	NA	Amino acid transport and metabolism ;	K01751//diaminopropionate ammonia-lyase [EC:4.3.1.15]	gi|83769424|dbj|BAE59559.1|//unnamed protein product [Aspergillus oryzae RIB40]
AO090026000768	930	7.90777	68.9233	3.12365	3.47227e-15	Up	1.15806e-15	NA	NA	NA	NA	NA	gi|914758878|gb|KOC12793.1|//hypothetical protein AFLA70_354g001130 [Aspergillus flavus AF70]
AO090103000329	939	49.289	429.197	3.1223	5.02234e-91	Up	6.12593e-92	NA	GO:0016209//antioxidant activity;GO:0005506//iron ion binding	GO:0008152//metabolic process;GO:0006950//response to stress	Inorganic ion transport and metabolism ;	K00428//cytochrome c peroxidase [EC:1.11.1.5]	gi|169784882|ref|XP_001826902.1|//heme-binding peroxidase [Aspergillus oryzae RIB40]
AO090020000509	2424	59.5139	517.462	3.12015	8.76315e-100	Up	1.02047e-100	NA	GO:0004672//protein kinase activity	GO:0006464//cellular protein modification process;GO:0006468//protein phosphorylation	NA	K15732//RNA polymerase II subunit A C-terminal domain phosphatase [EC:3.1.3.16]	gi|83773553|dbj|BAE63680.1|//unnamed protein product [Aspergillus oryzae RIB40];gi|391867233|gb|EIT76483.1|//hypothetical protein Ao3042_07486 [Aspergillus oryzae 3.042]
AO090010000642	2337	5.39481	46.8954	3.1198	3.74816e-10	Up	1.49022e-10	NA	GO:0046914//transition metal ion binding	NA	NA	K11971//E3 ubiquitin-protein ligase RNF14 [EC:2.3.2.27]	gi|83776352|dbj|BAE66471.1|//unnamed protein product [Aspergillus oryzae RIB40]
AO090020000085	1356	41.3689	359.281	3.1185	0.0479477	Up	0.0319121	NA	GO:0003824//catalytic activity	GO:0006720//isoprenoid metabolic process	Coenzyme transport and metabolism ;	K05355//hexaprenyl-diphosphate synthase [EC:2.5.1.82 2.5.1.83]	gi|169779988|ref|XP_001824458.1|//hexaprenyl pyrophosphate synthase [Aspergillus oryzae RIB40]
AO090009000132	1326	1.33696	11.608	3.11809	0.000910708	Up	0.00050662	NA	GO:0070011//peptidase activity, acting on L-amino acid peptides	GO:0019538//protein metabolic process	General function prediction only ;	NA	gi|83764494|dbj|BAE54638.1|//unnamed protein product [Aspergillus oryzae RIB40]
AO090103000130	1596	0.447556	3.88021	3.116	0.0239647	Up	0.0153632	GO:0031224//intrinsic component of membrane	GO:0022857//transmembrane transporter activity	GO:0006810//transport	Carbohydrate transport and metabolism ; Amino acid transport and metabolism ; Inorganic ion transport and metabolism ; General function prediction only ;	K08141//MFS transporter, SP family, general alpha glucoside:H+ symporter	gi|169784544|ref|XP_001826733.1|//MFS alpha-glucoside transporter [Aspergillus oryzae RIB40]
AO090005001239	378	443.683	3841.82	3.11419	0	Up	0	NA	NA	NA	NA	NA	gi|169767432|ref|XP_001818187.1|//hypothetical protein AOR_1_2140174 [Aspergillus oryzae RIB40]
AO090003000467	1410	608.807	5269.47	3.1136	0	Up	0	NA	NA	NA	Posttranslational modification, protein turnover, chaperones ;	K04523//ubiquilin	gi|169770353|ref|XP_001819646.1|//ubiquitin-like protein DskB [Aspergillus oryzae RIB40]
AO090005000284	1023	122.193	1053.21	3.10755	1.96026e-207	Up	1.40031e-208	GO:0044424//intracellular part	GO:0046914//transition metal ion binding;GO:0051287//NAD binding;GO:0016810//hydrolase activity, acting on carbon-nitrogen (but not peptide) bonds	GO:0016458//gene silencing;GO:0035601//protein deacylation	Transcription ;	K11121//NAD-dependent histone deacetylase SIR2 [EC:3.5.1.-]	gi|169765792|ref|XP_001817367.1|//SIR2 family histone deacetylase [Aspergillus oryzae RIB40]
AO090010000070	843	3.86813	33.3242	3.10686	1.67002e-08	Up	7.09331e-09	NA	GO:0003824//catalytic activity	NA	General function prediction only ;	NA	gi|391873413|gb|EIT82456.1|//Zn-dependent hydrolase [Aspergillus oryzae 3.042]
AO090020000267	1494	2.193	18.8851	3.10627	6.33203e-05	Up	3.24616e-05	NA	NA	GO:0006810//transport	Carbohydrate transport and metabolism ; Amino acid transport and metabolism ; Inorganic ion transport and metabolism ; General function prediction only ;	K01939//adenylosuccinate synthase [EC:6.3.4.4];K13336//peroxin-3;K11369//retrograde regulation protein 2	gi|391863120|gb|EIT72434.1|//permease of the major facilitator superfamily [Aspergillus oryzae 3.042]
AO090701000772	900	6.0742	52.2838	3.1056	2.48298e-10	Up	9.79659e-11	NA	NA	NA	General function prediction only ;	K12828//splicing factor 3B subunit 1;K20032//palmitoyltransferase ZDHHC13/17 [EC:2.3.1.225];K15502//serine/threonine-protein phosphatase 6 regulatory ankyrin repeat subunit A;K16261//yeast amino acid transporter	gi|83772304|dbj|BAE62434.1|//unnamed protein product [Aspergillus oryzae RIB40]
AO090005000539	1527	1.76726	15.1904	3.10358	0.000206171	Up	0.000109111	NA	GO:0016831//carboxy-lyase activity;GO:0048037//cofactor binding	GO:0009064//glutamine family amino acid metabolic process	Amino acid transport and metabolism ;	K01580//glutamate decarboxylase [EC:4.1.1.15]	gi|169766242|ref|XP_001817592.1|//glutamate decarboxylase 1 [Aspergillus oryzae RIB40]
AO090701000175	1680	1584.41	13595.1	3.10107	0	Up	0	NA	GO:0016836//hydro-lyase activity;GO:0051536//iron-sulfur cluster binding	GO:0019543//propionate catabolic process	General function prediction only ;	K01720//2-methylcitrate dehydratase [EC:4.2.1.79]	gi|169777169|ref|XP_001823050.1|//2-methylcitrate dehydratase [Aspergillus oryzae RIB40]
AO090138000025	408	0.8741	7.48249	3.09765	0.00402775	Up	0.00236556	GO:0044464//cell part	GO:0032559//adenyl ribonucleotide binding;GO:0004871//signal transducer activity;GO:0004673//protein histidine kinase activity	GO:0007165//signal transduction;GO:0006468//protein phosphorylation	Signal transduction mechanisms ;	K19691//osomolarity two-component system, sensor histidine kinase NIK1 [EC:2.7.13.3];K20168//TBC1 domain family member 15;K11233//osomolarity two-component system, response regulator SSK1	gi|83774286|dbj|BAE64410.1|//unnamed protein product [Aspergillus oryzae RIB40]
AO090701000735	3851	56.1656	480.3	3.09618	2.63218e-92	Up	3.18876e-93	NA	NA	NA	Carbohydrate transport and metabolism ;	K05747//Wiskott-Aldrich syndrome protein	gi|770305440|gb|KJK63301.1|//hypothetical protein P875_00033796 [Aspergillus parasiticus SU-1];gi|238495408|ref|XP_002378940.1|//cell wall protein, putative [Aspergillus flavus NRRL3357]
AO090005000551	669	32.1008	274.156	3.09432	7.47784e-56	Up	1.24183e-56	NA	GO:0016824//hydrolase activity, acting on acid halide bonds	NA	General function prediction only ;	K01560//2-haloacid dehalogenase [EC:3.8.1.2]	gi|83765456|dbj|BAE55599.1|//unnamed protein product [Aspergillus oryzae RIB40]
AO09M000000020	1983	3.04112	25.8917	3.08981	0.0215011	Up	0.0136908	NA	NA	NA	Signal transduction mechanisms ; Carbohydrate transport and metabolism ;	NA	gi|380702242|gb|AFD96011.1|//hypothetical protein AO090002_m0430 (mitochondrion) [Aspergillus oryzae]
AO090003000318	519	0.454823	3.85578	3.08365	0.0270313	Up	0.0174461	NA	NA	NA	NA	NA	gi|83767376|dbj|BAE57515.1|//unnamed protein product [Aspergillus oryzae RIB40]
BGI_novel_G000017	3808	50.0009	422.056	3.07741	2.73936e-84	Up	3.54556e-85	NA	NA	NA	NA	K00859//dephospho-CoA kinase [EC:2.7.1.24];K01610//phosphoenolpyruvate carboxykinase (ATP) [EC:4.1.1.49]	gi|317143309|ref|XP_003189492.1|//hypothetical protein AOR_1_298154 [Aspergillus oryzae RIB40]
AO090102000011	1221	1.31319	11.078	3.07656	0.00102694	Up	0.00057421	NA	GO:0004553//hydrolase activity, hydrolyzing O-glycosyl compounds	GO:0045229//external encapsulating structure organization;GO:0005976//polysaccharide metabolic process	Cell wall/membrane/envelope biogenesis ;	K01213//galacturan 1,4-alpha-galacturonidase [EC:3.2.1.67]	gi|169775587|ref|XP_001822260.1|//endo-xylogalacturonan hydrolase A [Aspergillus oryzae RIB40]
AO090102000051	2786	95.0284	801.389	3.07607	1.46595e-151	Up	1.27217e-152	GO:0016021//integral component of membrane	GO:0016491//oxidoreductase activity	GO:0008152//metabolic process	Energy production and conversion ;	K01488//adenosine deaminase [EC:3.5.4.4]	gi|83771030|dbj|BAE61162.1|//unnamed protein product [Aspergillus oryzae RIB40];gi|317147810|ref|XP_001822296.2|//hypothetical protein AOR_1_88134 [Aspergillus oryzae RIB40]
AO090701000376	1002	52.8767	444.939	3.0729	6.70995e-74	Up	9.44446e-75	NA	NA	NA	NA	K05287//phosphatidylinositol glycan, class F [EC:2.7.-.-]	gi|83771965|dbj|BAE62095.1|//unnamed protein product [Aspergillus oryzae RIB40]
AO090003000890	651	7.2821	61.165	3.07028	0.037065	Up	0.0242494	NA	GO:0003824//catalytic activity	GO:0008152//metabolic process	NA	NA	gi|83767870|dbj|BAE58009.1|//unnamed protein product [Aspergillus oryzae RIB40]
AO090020000609	1494	79.8525	668.428	3.06536	8.59425e-138	Up	7.9906e-139	NA	GO:0016787//hydrolase activity	GO:0006629//lipid metabolic process	NA	K21016//feruloyl esterase [EC:3.1.1.73]	gi|83773639|dbj|BAE63766.1|//unnamed protein product [Aspergillus oryzae RIB40];gi|317155076|ref|XP_001824899.2|//hypothetical protein AOR_1_1056084 [Aspergillus oryzae RIB40]
AO090003001545	3066	17.8963	149.481	3.06223	9.51734e-30	Up	2.27267e-30	NA	GO:0016620//oxidoreductase activity, acting on the aldehyde or oxo group of donors, NAD or NADP as acceptor;GO:0022892//substrate-specific transporter activity;GO:0019842//vitamin binding	NA	Secondary metabolites biosynthesis, transport and catabolism ;	K00143//L-aminoadipate-semialdehyde dehydrogenase [EC:1.2.1.31]	gi|169772223|ref|XP_001820581.1|//NRPS-like enzyme [Aspergillus oryzae RIB40]
AO090166000071	1776	27.0101	225.312	3.06036	7.81011e-45	Up	1.47316e-45	NA	NA	NA	NA	NA	gi|238502135|ref|XP_002382301.1|//conserved hypothetical protein [Aspergillus flavus NRRL3357]
AO090038000278	360	1.09116	9.07728	3.0564	0.00198668	Up	0.00113535	NA	NA	NA	NA	K01210//glucan 1,3-beta-glucosidase [EC:3.2.1.58]	gi|83773962|dbj|BAE64087.1|//unnamed protein product [Aspergillus oryzae RIB40]
AO090003001067	5648	6576.91	54636.2	3.05437	0	Up	0	NA	GO:0016301//kinase activity	GO:0006071//glycerol metabolic process;GO:0006796//phosphate-containing compound metabolic process	Energy production and conversion ;	K00864//glycerol kinase [EC:2.7.1.30]	gi|966767790|dbj|GAQ37902.1|//glycerol kinase [Aspergillus niger];gi|169771401|ref|XP_001820170.1|//glycerol kinase [Aspergillus oryzae RIB40]
AO090001000203	1005	22.9777	189.724	3.04559	4.1162e-38	Up	8.5522e-39	NA	NA	NA	Cell wall/membrane/envelope biogenesis ; Carbohydrate transport and metabolism ;	NA	gi|83766607|dbj|BAE56747.1|//unnamed protein product [Aspergillus oryzae RIB40]
AO090005000384	1551	34.4493	284.363	3.04519	5.5765e-54	Up	9.46101e-55	NA	NA	NA	NA	K09246//arginine metabolism regulation protein II;K17906//autophagy-related protein 2;K01824//cholestenol Delta-isomerase [EC:5.3.3.5]	gi|83765311|dbj|BAE55454.1|//unnamed protein product [Aspergillus oryzae RIB40]
BGI_novel_G000004	1289	4.9216	40.5768	3.04346	1.11732e-09	Up	4.53799e-10	NA	GO:0005488//binding;GO:0016491//oxidoreductase activity	NA	NA	K17475//tryprostatin B 6-hydroxylase [EC:1.14.13.176]	gi|770309633|gb|KJK66681.1|//Cytochrome P450 [Aspergillus parasiticus SU-1]
AO090020000514	789	357.039	2943.59	3.04343	0	Up	0	NA	NA	NA	NA	K01336//cerevisin [EC:3.4.21.48]	gi|169780706|ref|XP_001824817.1|//hypothetical protein AOR_1_896084 [Aspergillus oryzae RIB40]
AO090012000571	831	51.8675	426.549	3.03981	7.13722e-84	Up	9.27057e-85	NA	GO:0016741//transferase activity, transferring one-carbon groups	GO:0006730//one-carbon metabolic process	Coenzyme transport and metabolism ;	NA	gi|169763332|ref|XP_001727566.1|//hypothetical protein AOR_1_994194 [Aspergillus oryzae RIB40]
BGI_novel_G000157	2524	108.982	893.539	3.03544	1.09518e-181	Up	8.51907e-183	GO:0005634//nucleus;GO:0016021//integral component of membrane	GO:0003677//DNA binding;GO:0005524//ATP binding;GO:0008270//zinc ion binding	GO:0006351//transcription, DNA-templated	NA	K01426//amidase [EC:3.5.1.4];K09240//transcriptional regulatory protein CAT8	gi|914753592|gb|KOC07757.1|//hypothetical protein AFLA70_101g002801 [Aspergillus flavus AF70]
AO090010000683	1038	0.911721	7.47475	3.03536	0.0070629	Up	0.00424632	NA	NA	NA	NA	NA	gi|83776384|dbj|BAE66503.1|//unnamed protein product [Aspergillus oryzae RIB40]
AO090009000024	1050	50.7661	415.469	3.0328	4.12709e-83	Up	5.41769e-84	NA	GO:0016741//transferase activity, transferring one-carbon groups	GO:0006730//one-carbon metabolic process	NA	NA	gi|83764402|dbj|BAE54546.1|//unnamed protein product [Aspergillus oryzae RIB40];gi|317137939|ref|XP_001816548.2|//hypothetical protein AOR_1_34184 [Aspergillus oryzae RIB40]
AO090005000364	2182	2101.36	17174.7	3.03089	0	Up	0	GO:0031224//intrinsic component of membrane	GO:0046914//transition metal ion binding;GO:0003824//catalytic activity;GO:0050662//coenzyme binding	NA	NA	K00521//ferric-chelate reductase [EC:1.16.1.7]	gi|317139332|ref|XP_001817439.2|//ferric-chelate reductase (Fre2) [Aspergillus oryzae RIB40];gi|83765294|dbj|BAE55437.1|//unnamed protein product [Aspergillus oryzae RIB40]
AO090003001410	2643	57.5936	469.748	3.02791	4.77036e-97	Up	5.66488e-98	NA	GO:0043167//ion binding;GO:0016798//hydrolase activity, acting on glycosyl bonds	GO:0044238//primary metabolic process	Carbohydrate transport and metabolism ;	K15855//exo-1,4-beta-D-glucosaminidase [EC:3.2.1.165]	gi|169771993|ref|XP_001820466.1|//glycosyl hydrolase [Aspergillus oryzae RIB40]
AO090011000829	2925	19.9903	163	3.0275	5.37745e-34	Up	1.19746e-34	NA	NA	NA	NA	NA	gi|317157331|ref|XP_001826404.2|//hypothetical protein AOR_1_1392054 [Aspergillus oryzae RIB40];gi|914763195|gb|KOC17010.1|//hypothetical protein AFLA70_282g001211 [Aspergillus flavus AF70]
AO090701000717	1275	70.319	571.497	3.02276	2.67641e-117	Up	2.80625e-118	NA	NA	NA	Carbohydrate transport and metabolism ;	K20628//expansin	gi|169778111|ref|XP_001823521.1|//cellulase [Aspergillus oryzae RIB40]
AO090003000022	1263	37.4214	303.386	3.01922	3.94077e-63	Up	6.06552e-64	NA	NA	GO:0044238//primary metabolic process	Lipid transport and metabolism ;	K01046//triacylglycerol lipase [EC:3.1.1.3];K05757//actin related protein 2/3 complex, subunit 1A/1B;K21016//feruloyl esterase [EC:3.1.1.73]	gi|169769589|ref|XP_001819264.1|//extracellular triacylglycerol lipase [Aspergillus oryzae RIB40]
AO090120000321	1470	345.422	2797.75	3.01783	0	Up	0	NA	NA	NA	NA	NA	gi|169779163|ref|XP_001824046.1|//hypothetical protein AOR_1_566094 [Aspergillus oryzae RIB40]
AO090005001143	1354	265.617	2149.65	3.01669	0	Up	0	NA	GO:0016829//lyase activity	NA	NA	NA	gi|317140301|ref|XP_003189254.1|//hypothetical protein AOR_1_1990174 [Aspergillus oryzae RIB40];gi|83765965|dbj|BAE56108.1|//unnamed protein product [Aspergillus oryzae RIB40]
AO090701000063	651	262.488	2124.07	3.01651	0	Up	0	GO:0044424//intracellular part	NA	GO:0006412//translation	NA	NA	gi|169776981|ref|XP_001822956.1|//Hsp70 nucleotide exchange factor fes1 [Aspergillus oryzae RIB40]
AO090026000800	396	12.155	98.2214	3.01449	1.75827e-19	Up	5.20699e-20	NA	GO:0046914//transition metal ion binding;GO:0003824//catalytic activity	NA	Nucleotide transport and metabolism ;	K01489//cytidine deaminase [EC:3.5.4.5]	gi|169775471|ref|XP_001822203.1|//blasticidin-S deaminase [Aspergillus oryzae RIB40]
AO090005001544	456	54.6136	440.579	3.01207	1.30943e-86	Up	1.65502e-87	NA	NA	NA	NA	NA	gi|83766309|dbj|BAE56452.1|//unnamed protein product [Aspergillus oryzae RIB40]
AO090010000708	888	0.473854	3.82219	3.01189	0.0353468	Up	0.023083	NA	GO:0016616//oxidoreductase activity, acting on the CH-OH group of donors, NAD or NADP as acceptor	GO:0044238//primary metabolic process;GO:0044237//cellular metabolic process;GO:0044281//small molecule metabolic process	Lipid transport and metabolism ;	K00020//3-hydroxyisobutyrate dehydrogenase [EC:1.1.1.31]	gi|169786397|ref|XP_001827659.1|//oxidoreductase [Aspergillus oryzae RIB40]
AO090103000176	516	0.723658	5.82904	3.00988	0.0204978	Up	0.013022	NA	NA	NA	NA	NA	gi|83775518|dbj|BAE65638.1|//unnamed protein product [Aspergillus oryzae RIB40]
AO090102000168	1587	1.31	10.552	3.00988	0.00133477	Up	0.000752966	NA	GO:0005506//iron ion binding;GO:0016491//oxidoreductase activity	GO:0008152//metabolic process	Secondary metabolites biosynthesis, transport and catabolism ;	K21295//multifunctional cytochrome P450 monooxygenase	gi|169775867|ref|XP_001822400.1|//O-methylsterigmatocystin oxidoreductase [Aspergillus oryzae RIB40]
AO090001000716	1563	703.914	5667.36	3.00921	0	Up	0	NA	NA	NA	NA	K16261//yeast amino acid transporter	gi|83767066|dbj|BAE57206.1|//unnamed protein product [Aspergillus oryzae RIB40]
AO090011000266	663	1328.27	10688.6	3.00844	0	Up	0	NA	NA	NA	Function unknown ;	K15532//unsaturated rhamnogalacturonyl hydrolase [EC:3.2.1.172]	gi|83774669|dbj|BAE64792.1|//unnamed protein product [Aspergillus oryzae RIB40]
AO090011000576	1176	949.657	7591.46	2.9989	0	Up	0	NA	GO:0016616//oxidoreductase activity, acting on the CH-OH group of donors, NAD or NADP as acceptor;GO:0000166//nucleotide binding;GO:0048037//cofactor binding	GO:0006059//hexitol metabolic process;GO:0006950//response to stress	Carbohydrate transport and metabolism ;	K00009//mannitol-1-phosphate 5-dehydrogenase [EC:1.1.1.17]	gi|169783454|ref|XP_001826189.1|//mannitol-1-phosphate 5-dehydrogenase [Aspergillus oryzae RIB40]
AO090102000056	1545	0.878146	6.98138	2.99098	0.0069664	Up	0.0041859	NA	NA	GO:0006810//transport	Carbohydrate transport and metabolism ; Amino acid transport and metabolism ; Inorganic ion transport and metabolism ; General function prediction only ;	K08158//MFS transporter, DHA1 family, multidrug resistance protein	gi|169775667|ref|XP_001822300.1|//MFS transporter [Aspergillus oryzae RIB40]
AO090003001019	486	52.9012	420.158	2.98956	1.44007e-77	Up	1.97657e-78	NA	NA	NA	Nucleotide transport and metabolism ;	K03574//8-oxo-dGTP diphosphatase [EC:3.6.1.55]	gi|169771317|ref|XP_001820128.1|//7,8-dihydro-8-oxoguanine triphosphatase NUDT15 [Aspergillus oryzae RIB40]
AO090003001084	2738	541.373	4298.03	2.98898	0	Up	0	GO:0016021//integral component of membrane	GO:0016746//transferase activity, transferring acyl groups;GO:0016747//transferase activity, transferring acyl groups other than amino-acyl groups	GO:0008152//metabolic process	Lipid transport and metabolism ;	K13507//glycerol-3-phosphate O-acyltransferase / dihydroxyacetone phosphate acyltransferase [EC:2.3.1.15 2.3.1.42]	gi|83768042|dbj|BAE58181.1|//unnamed protein product [Aspergillus oryzae RIB40]
AO090026000063	729	1.33359	10.5838	2.98847	0.00176543	Up	0.00100517	NA	GO:0016209//antioxidant activity	NA	NA	NA	gi|169774189|ref|XP_001821562.1|//hypothetical protein AOR_1_126014 [Aspergillus oryzae RIB40]
AO090011000004	837	1.72951	13.6567	2.98117	0.000287675	Up	0.000154152	NA	GO:0003824//catalytic activity	GO:0008152//metabolic process	Lipid transport and metabolism ; Secondary metabolites biosynthesis, transport and catabolism ; General function prediction only ;	K06123//1-acylglycerone phosphate reductase [EC:1.1.1.101]	gi|169782478|ref|XP_001825701.1|//oxidoreductase, short-chain dehydrogenase/reductase family [Aspergillus oryzae RIB40]
AO090009000355	1337	442.369	3484.97	2.97782	0	Up	0	GO:0016021//integral component of membrane;GO:0005789//endoplasmic reticulum membrane	GO:0008422//beta-glucosidase activity;GO:0102483//scopolin beta-glucosidase activity	GO:0019915//lipid storage;GO:0030245//cellulose catabolic process	NA	K00988//ATP adenylyltransferase [EC:2.7.7.53];K07407//alpha-galactosidase [EC:3.2.1.22]	gi|83764684|dbj|BAE54828.1|//unnamed protein product [Aspergillus oryzae RIB40];gi|317138321|ref|XP_001816830.2|//inositol phospholipid biosynthesis protein Scs3 [Aspergillus oryzae RIB40]
AO090102000469	1251	19.8287	156.131	2.9771	3.74008e-31	Up	8.73133e-32	NA	NA	NA	General function prediction only ;	K16726//ankyrin repeat domain-containing protein 17	gi|169776345|ref|XP_001822639.1|//hypothetical protein AOR_1_772134 [Aspergillus oryzae RIB40]
AO090102000479	555	20.2687	159.161	2.97317	9.13653e-25	Up	2.38527e-25	GO:0031224//intrinsic component of membrane	GO:0022857//transmembrane transporter activity	GO:0071702//organic substance transport	Carbohydrate transport and metabolism ; Amino acid transport and metabolism ; Inorganic ion transport and metabolism ; General function prediction only ;	K08139//MFS transporter, SP family, sugar:H+ symporter;K00382//dihydrolipoamide dehydrogenase [EC:1.8.1.4];K08150//MFS transporter, SP family, solute carrier family 2 (myo-inositol transporter), member 13	gi|83771381|dbj|BAE61513.1|//unnamed protein product [Aspergillus oryzae RIB40]
AO090009000140	2823	1294.99	10147.7	2.97015	0	Up	0	NA	GO:0016741//transferase activity, transferring one-carbon groups;GO:0016742//hydroxymethyl-, formyl- and related transferase activity;GO:0016491//oxidoreductase activity	GO:0008152//metabolic process;GO:0009058//biosynthetic process;GO:0055114//oxidation-reduction process	Function unknown ;	K00295//methylenetetrahydrofolate dehydrogenase (NAD+) [EC:1.5.1.15]	gi|169764351|ref|XP_001816647.1|//hypothetical protein AOR_1_238184 [Aspergillus oryzae RIB40]
AO090701000546	834	30.0216	234.95	2.96828	5.3065e-46	Up	9.81871e-47	NA	NA	NA	NA	NA	gi|169777823|ref|XP_001823377.1|//hypothetical protein AOR_1_998114 [Aspergillus oryzae RIB40]
AO090701000174	1761	17.6693	138.246	2.96792	1.9769e-27	Up	4.88448e-28	NA	GO:0016741//transferase activity, transferring one-carbon groups;GO:0003676//nucleic acid binding	GO:0006305//DNA alkylation	Replication, recombination and repair ;	K00558//DNA (cytosine-5)-methyltransferase 1 [EC:2.1.1.37]	gi|83771786|dbj|BAE61916.1|//unnamed protein product [Aspergillus oryzae RIB40]
AO090011000139	1005	728.709	5694.84	2.96624	6.14067e-104	Up	6.91907e-105	NA	NA	NA	Translation, ribosomal structure and biogenesis ;	K19721//collagen, type V/XI/XXIV/XXVII, alpha	gi|169782718|ref|XP_001825821.1|//WW domain protein [Aspergillus oryzae RIB40]
AO090001000167	1398	1.09318	8.53811	2.96539	0.00373093	Up	0.00218573	GO:0044464//cell part	NA	NA	NA	K00213//7-dehydrocholesterol reductase [EC:1.3.1.21]	gi|169768496|ref|XP_001818718.1|//7-dehydrosterol-delta 7-reductase [Aspergillus oryzae RIB40]
AO090701000490	2016	1408.96	10960.1	2.95955	0	Up	0	NA	GO:0016641//oxidoreductase activity, acting on the CH-NH2 group of donors, oxygen as acceptor;GO:0046914//transition metal ion binding;GO:0048037//cofactor binding	GO:0006807//nitrogen compound metabolic process	Secondary metabolites biosynthesis, transport and catabolism ;	K00276//primary-amine oxidase [EC:1.4.3.21]	gi|169777727|ref|XP_001823329.1|//copper amine oxidase 1 [Aspergillus oryzae RIB40]
AO090010000078	990	17.473	135.541	2.95553	5.77059e-28	Up	1.41303e-28	NA	GO:0003824//catalytic activity	GO:0008152//metabolic process	NA	K03022//DNA-directed RNA polymerase III subunit RPC8	gi|83775872|dbj|BAE65991.1|//unnamed protein product [Aspergillus oryzae RIB40]
AO090010000050	894	1.09731	8.50708	2.9547	0.00386188	Up	0.0022653	NA	GO:0003824//catalytic activity	NA	NA	NA	gi|83775848|dbj|BAE65967.1|//unnamed protein product [Aspergillus oryzae RIB40]
AO090001000155	924	3.90675	30.272	2.95394	1.97015e-06	Up	9.21508e-07	NA	NA	NA	NA	NA	gi|83766564|dbj|BAE56704.1|//unnamed protein product [Aspergillus oryzae RIB40]
AO090102000482	816	137.588	1064.01	2.95108	5.7714e-190	Up	4.3672e-191	NA	NA	NA	NA	K02920//large subunit ribosomal protein L36e;K00108//choline dehydrogenase [EC:1.1.99.1];K14326//regulator of nonsense transcripts 1 [EC:3.6.4.-]	gi|317148255|ref|XP_001822648.2|//integral membrane protein [Aspergillus oryzae RIB40]
AO090701000801	1182	8.56878	66.2502	2.95076	2.43162e-13	Up	8.59337e-14	GO:0016021//integral component of membrane	NA	NA	NA	NA	gi|83772329|dbj|BAE62459.1|//unnamed protein product [Aspergillus oryzae RIB40];gi|238495528|ref|XP_002379000.1|//GILT family thiol reductase, putative [Aspergillus flavus NRRL3357]
AO090701000902	1017	1.77031	13.6866	2.95069	0.00088994	Up	0.000494739	NA	NA	NA	NA	NA	gi|83772418|dbj|BAE62548.1|//unnamed protein product [Aspergillus oryzae RIB40]
AO090023000323	816	2.8396	21.951	2.95053	2.13943e-05	Up	1.0639e-05	NA	NA	NA	NA	K19841//protein STE50;K06113//arabinan endo-1,5-alpha-L-arabinosidase [EC:3.2.1.99];K12848//U4/U6.U5 tri-snRNP component SNU23	gi|169772835|ref|XP_001820886.1|//hypothetical protein AOR_1_554144 [Aspergillus oryzae RIB40]
AO090701000046	1388	437.289	3371.89	2.9469	0	Up	0	NA	GO:0016614//oxidoreductase activity, acting on CH-OH group of donors;GO:0016620//oxidoreductase activity, acting on the aldehyde or oxo group of donors, NAD or NADP as acceptor;GO:0016616//oxidoreductase activity, acting on the CH-OH group of donors, NAD or NADP as acceptor;GO:0000166//nucleotide binding;GO:0051287//NAD binding	GO:0008152//metabolic process;GO:0055114//oxidation-reduction process	Energy production and conversion ; Coenzyme transport and metabolism ; General function prediction only ;	K00122//formate dehydrogenase [EC:1.2.1.2]	gi|317148821|ref|XP_001822940.2|//formate dehydrogenase [Aspergillus oryzae RIB40];gi|83771677|dbj|BAE61807.1|//unnamed protein product [Aspergillus oryzae RIB40]
AO090038000441	1371	1985.59	15304.7	2.94634	0	Up	0	NA	NA	NA	NA	K03115//casein kinase II subunit beta	gi|169781798|ref|XP_001825362.1|//casein kinase II beta 2 subunit [Aspergillus oryzae RIB40]
AO090701000829	795	248.489	1914.03	2.94536	3.19902e-275	Up	1.7846e-276	NA	NA	NA	NA	K00480//salicylate hydroxylase [EC:1.14.13.1]	gi|169778301|ref|XP_001823616.1|//citrinin biosynthesis oxydoreductase CtnB [Aspergillus oryzae RIB40]
AO090001000172	1557	0.697422	5.36256	2.94282	0.0223618	Up	0.0142718	GO:0044464//cell part	NA	GO:0006810//transport	Carbohydrate transport and metabolism ; Amino acid transport and metabolism ; Inorganic ion transport and metabolism ; General function prediction only ;	K08158//MFS transporter, DHA1 family, multidrug resistance protein;K08157//MFS transporter, DHA1 family, multidrug resistance protein	gi|169768506|ref|XP_001818723.1|//MFS multidrug transporter [Aspergillus oryzae RIB40]
AO090026000408	1238	41.4712	318.799	2.94246	3.18272e-56	Up	5.26792e-57	NA	NA	NA	NA	NA	gi|238496597|ref|XP_002379534.1|//conserved hypothetical protein [Aspergillus flavus NRRL3357];gi|317147682|ref|XP_001821865.2|//hypothetical protein AOR_1_1626014 [Aspergillus oryzae RIB40]
AO090166000077	3047	34.1029	261.453	2.93859	7.91236e-45	Up	1.49317e-45	GO:0016021//integral component of membrane	GO:0000287//magnesium ion binding;GO:0050660//flavin adenine dinucleotide binding;GO:0030976//thiamine pyrophosphate binding;GO:0003984//acetolactate synthase activity	GO:0009099//valine biosynthetic process;GO:0006950//response to stress;GO:0009097//isoleucine biosynthetic process	NA	K01652//acetolactate synthase I/II/III large subunit [EC:2.2.1.6]	gi|391870774|gb|EIT79947.1|//hypothetical protein Ao3042_03583 [Aspergillus oryzae 3.042];gi|83771597|dbj|BAE61728.1|//unnamed protein product [Aspergillus oryzae RIB40]
BGI_novel_G000093	1520	441.637	3383.33	2.93751	0	Up	0	GO:0016021//integral component of membrane	NA	GO:0016192//vesicle-mediated transport	NA	K08486//syntaxin 1B/2/3	gi|317151520|ref|XP_003190529.1|//SNARE domain protein [Aspergillus oryzae RIB40]
AO090102000125	1722	2043.27	15646.5	2.93689	0	Up	0	GO:0031224//intrinsic component of membrane;GO:0005622//intracellular;GO:0016021//integral component of membrane;GO:0019866//organelle inner membrane	GO:0003779//actin binding	GO:0006810//transport	NA	K15100//solute carrier family 25 (mitochondrial citrate transporter), member 1	gi|992227352|ref|XP_015410456.1|//hypothetical protein ANOM_001905 [Aspergillus nomius NRRL 13137];gi|169775789|ref|XP_001822361.1|//succinate/fumarate transporter [Aspergillus oryzae RIB40]
AO090003000470	1056	125.988	964.683	2.93677	2.31623e-157	Up	1.96378e-158	NA	GO:0016810//hydrolase activity, acting on carbon-nitrogen (but not peptide) bonds	GO:0008152//metabolic process	General function prediction only ;	K01501//nitrilase [EC:3.5.5.1]	gi|169770359|ref|XP_001819649.1|//nitrilase [Aspergillus oryzae RIB40]
AO090001000115	996	0.4417	3.38013	2.93594	0.0379916	Up	0.0248836	NA	NA	NA	Energy production and conversion ;	K15303//aflatoxin B1 aldehyde reductase;K00480//salicylate hydroxylase [EC:1.14.13.1]	gi|83766527|dbj|BAE56667.1|//unnamed protein product [Aspergillus oryzae RIB40]
AO090005000592	1902	2785.72	21247.6	2.93118	0	Up	0	NA	GO:0016627//oxidoreductase activity, acting on the CH-CH group of donors;GO:0005506//iron ion binding	GO:0008152//metabolic process	Energy production and conversion ;	K01593//aromatic-L-amino-acid decarboxylase [EC:4.1.1.28];K18561//FAD-dependent fumarate reductase [EC:1.3.8.-]	gi|169766332|ref|XP_001817637.1|//fumarate reductase [Aspergillus oryzae RIB40]
AO090023000474	1422	459.054	3500.48	2.93082	0	Up	0	GO:0031224//intrinsic component of membrane	GO:0003824//catalytic activity;GO:0043167//ion binding	GO:0044238//primary metabolic process	Amino acid transport and metabolism ;	NA	gi|169773099|ref|XP_001821018.1|//1,3-beta-glucanosyltransferase gel2 [Aspergillus oryzae RIB40]
AO090103000051	1215	174.353	1325.29	2.92622	2.14734e-216	Up	1.48256e-217	NA	GO:0016846//carbon-sulfur lyase activity;GO:0048037//cofactor binding	GO:0019752//carboxylic acid metabolic process	Amino acid transport and metabolism ;	K01758//cystathionine gamma-lyase [EC:4.4.1.1]	gi|169784412|ref|XP_001826667.1|//cystathionine gamma-lyase [Aspergillus oryzae RIB40]
AO090001000340	653	14.8996	113.202	2.92556	9.62107e-23	Up	2.63045e-23	GO:0044424//intracellular part	GO:0004497//monooxygenase activity;GO:0016491//oxidoreductase activity	GO:0016999//antibiotic metabolic process;GO:0055114//oxidation-reduction process	Function unknown ;	NA	gi|169768806|ref|XP_001818873.1|//antibiotic biosynthesis monooxygenase [Aspergillus oryzae RIB40]
AO090023000045	1554	75.4308	572.16	2.92319	6.02653e-106	Up	6.70724e-107	GO:0016021//integral component of membrane	GO:0016705//oxidoreductase activity, acting on paired donors, with incorporation or reduction of molecular oxygen;GO:0020037//heme binding;GO:0005506//iron ion binding;GO:0004497//monooxygenase activity;GO:0016491//oxidoreductase activity	GO:0008152//metabolic process;GO:0055114//oxidation-reduction process	Secondary metabolites biosynthesis, transport and catabolism ;	K07824//benzoate 4-monooxygenase [EC:1.14.13.12]	gi|317145262|ref|XP_001820634.2|//cytochrome P450 monooxygenase [Aspergillus oryzae RIB40];gi|83768495|dbj|BAE58632.1|//unnamed protein product [Aspergillus oryzae RIB40]
AO090103000118	1434	6.84371	51.8955	2.92276	1.4508e-11	Up	5.46771e-12	NA	GO:0003824//catalytic activity	GO:0008152//metabolic process	Amino acid transport and metabolism ;	K00274//monoamine oxidase [EC:1.4.3.4]	gi|169784522|ref|XP_001826722.1|//flavin-containing amine oxidase [Aspergillus oryzae RIB40]
AO090103000093	465	12.1407	92.0385	2.92239	3.54309e-19	Up	1.05644e-19	NA	NA	NA	NA	NA	gi|169784478|ref|XP_001826700.1|//hypothetical protein AOR_1_166034 [Aspergillus oryzae RIB40]
AO090001000403	855	5.37926	40.5998	2.91599	8.44506e-09	Up	3.53879e-09	NA	NA	NA	NA	K13507//glycerol-3-phosphate O-acyltransferase / dihydroxyacetone phosphate acyltransferase [EC:2.3.1.15 2.3.1.42];K01869//leucyl-tRNA synthetase [EC:6.1.1.4];K08658//prenyl protein peptidase [EC:3.4.22.-]	gi|169768914|ref|XP_001818927.1|//sucrase/ferredoxin domain protein [Aspergillus oryzae RIB40]
AO090010000582	825	0.445181	3.35948	2.91578	0.0405382	Up	0.026656	NA	GO:0016836//hydro-lyase activity;GO:0046914//transition metal ion binding	GO:0044237//cellular metabolic process	Inorganic ion transport and metabolism ;	K01674//carbonic anhydrase [EC:4.2.1.1]	gi|169786181|ref|XP_001827551.1|//carbonic anhydrase [Aspergillus oryzae RIB40]
AO090020000489	354	114.485	859.33	2.90806	2.17528e-162	Up	1.81623e-163	NA	NA	NA	NA	K18178//cytochrome c oxidase assembly factor 5	gi|169780660|ref|XP_001824794.1|//short chain dehydrogenase [Aspergillus oryzae RIB40]
AO090009000482	450	3.67458	27.579	2.90792	7.12668e-06	Up	3.42787e-06	NA	NA	NA	NA	NA	gi|238503796|ref|XP_002383130.1|//conserved hypothetical protein [Aspergillus flavus NRRL3357]
AO090003001215	2586	3052.48	22886.8	2.90646	0	Up	0	NA	GO:0003824//catalytic activity;GO:0016491//oxidoreductase activity	GO:0008152//metabolic process;GO:0055114//oxidation-reduction process	Inorganic ion transport and metabolism ;	K00327//NADPH-ferrihemoprotein reductase [EC:1.6.2.4];K00380//sulfite reductase (NADPH) flavoprotein alpha-component [EC:1.8.1.2]	gi|914762426|gb|KOC16241.1|//FAD binding domain protein [Aspergillus flavus AF70];gi|83768154|dbj|BAE58293.1|//unnamed protein product [Aspergillus oryzae RIB40]
AO090003001185	1120	5.56951	41.4933	2.89726	8.00613e-09	Up	3.35118e-09	NA	NA	NA	NA	K09265//transcription factor RLM1	gi|238485814|ref|XP_002374145.1|//conserved hypothetical protein [Aspergillus flavus NRRL3357]
AO090102000620	2683	11392	84843.8	2.89679	0	Up	0	GO:0044424//intracellular part	GO:0005515//protein binding;GO:0005524//ATP binding;GO:0032559//adenyl ribonucleotide binding;GO:0051082//unfolded protein binding	GO:0044267//cellular protein metabolic process;GO:0006457//protein folding;GO:0050896//response to stimulus;GO:0006950//response to stress	Posttranslational modification, protein turnover, chaperones ;	K04079//molecular chaperone HtpG	gi|992079092|ref|XP_015403081.1|//heat shock protein 90, partial [Aspergillus nomius NRRL 13137]
AO090012000193	1089	97.1631	722.539	2.89459	5.93525e-133	Up	5.69321e-134	GO:0044424//intracellular part	GO:0046914//transition metal ion binding	GO:0008152//metabolic process	Posttranslational modification, protein turnover, chaperones ;	K03190//urease accessory protein	gi|169762698|ref|XP_001727249.1|//urease accessory protein UreD [Aspergillus oryzae RIB40]
AO090003001128	3066	42.9803	318.638	2.89017	3.14457e-60	Up	4.94423e-61	NA	GO:0032559//adenyl ribonucleotide binding;GO:0017111//nucleoside-triphosphatase activity;GO:0003676//nucleic acid binding	NA	Transcription ; Replication, recombination and repair ;	K15710//E3 ubiquitin-protein ligase SHPRH [EC:3.6.4.- 2.3.2.27];K15083//DNA repair protein RAD16;K15505//DNA repair protein RAD5 [EC:3.6.4.-]	gi|83768080|dbj|BAE58219.1|//unnamed protein product [Aspergillus oryzae RIB40]
AO090701000224	3306	398.626	2955.1	2.8901	0	Up	0	NA	NA	NA	Function unknown ;	K20523//SH3 domain-containing YSC84-like protein 1	gi|169777257|ref|XP_001823094.1|//hypothetical protein AOR_1_414114 [Aspergillus oryzae RIB40]
AO090003000521	348	1.08807	8.0395	2.88533	0.00457685	Up	0.00270237	NA	NA	NA	NA	NA	gi|83767551|dbj|BAE57690.1|//unnamed protein product [Aspergillus oryzae RIB40]
AO090138000102	702	0.663609	4.8891	2.88116	0.022215	Up	0.0141719	GO:0043231//intracellular membrane-bounded organelle	GO:0046914//transition metal ion binding;GO:0003676//nucleic acid binding	NA	NA	NA	gi|914755748|gb|KOC09913.1|//hypothetical protein AFLA70_177g002171 [Aspergillus flavus AF70]
AO090010000083	1833	0.462516	3.40728	2.88105	0.0449535	Up	0.0297952	NA	NA	NA	Function unknown ;	NA	gi|83775877|dbj|BAE65996.1|//unnamed protein product [Aspergillus oryzae RIB40]
AO090003000214	675	2.85685	21.0028	2.87808	9.83511e-05	Up	5.09636e-05	GO:0043231//intracellular membrane-bounded organelle	GO:0046914//transition metal ion binding;GO:0001071//nucleic acid binding transcription factor activity	GO:0006351//transcription, DNA-templated	NA	NA	gi|83767287|dbj|BAE57426.1|//unnamed protein product [Aspergillus oryzae RIB40]
AO090023000977	2057	976.459	7177.84	2.87792	0	Up	0	NA	GO:0004084//branched-chain-amino-acid transaminase activity;GO:0052654//L-leucine transaminase activity;GO:0052656//L-isoleucine transaminase activity;GO:0052655//L-valine transaminase activity	GO:0008652//cellular amino acid biosynthetic process;GO:0009082//branched-chain amino acid biosynthetic process	Amino acid transport and metabolism ; Coenzyme transport and metabolism ;	K00826//branched-chain amino acid aminotransferase [EC:2.6.1.42]	gi|992076406|ref|XP_015401744.1|//branched-chain-amino-acid aminotransferase [Aspergillus nomius NRRL 13137];gi|169773997|ref|XP_001821467.1|//branched-chain-amino-acid aminotransferase [Aspergillus oryzae RIB40]
AO090003000206	1440	248.902	1828.75	2.87721	0	Up	0	NA	GO:0046914//transition metal ion binding	NA	NA	NA	gi|83767279|dbj|BAE57418.1|//unnamed protein product [Aspergillus oryzae RIB40]
AO090113000130	882	44.0626	323.558	2.8764	1.51431e-52	Up	2.60122e-53	NA	GO:0003824//catalytic activity	NA	NA	NA	gi|169779697|ref|XP_001824313.1|//mannosylphosphate transferase (Mnn4) [Aspergillus oryzae RIB40]
AO090011000764	1767	2848.08	20899.9	2.87544	0	Up	0	GO:0044424//intracellular part	GO:0005515//protein binding;GO:0032559//adenyl ribonucleotide binding	GO:0006457//protein folding;GO:0050896//response to stimulus	Posttranslational modification, protein turnover, chaperones ;	K04077//chaperonin GroEL	gi|169783766|ref|XP_001826345.1|//heat shock protein 60 [Aspergillus oryzae RIB40]
AO090026000288	1998	514.106	3766.46	2.87307	0	Up	0	NA	GO:0046914//transition metal ion binding;GO:0003824//catalytic activity	GO:0008152//metabolic process	Energy production and conversion ; General function prediction only ;	K13953//alcohol dehydrogenase, propanol-preferring [EC:1.1.1.1];K15172//transcription elongation factor SPT5	gi|83769628|dbj|BAE59763.1|//unnamed protein product [Aspergillus oryzae RIB40]
AO090010000505	837	667.849	4892.24	2.8729	0	Up	0	NA	GO:0003824//catalytic activity;GO:0051540//metal cluster binding	GO:0009060//aerobic respiration	Energy production and conversion ;	K00235//succinate dehydrogenase (ubiquinone) iron-sulfur subunit [EC:1.3.5.1]	gi|169786051|ref|XP_001827486.1|//succinate dehydrogenase (ubiquinone) iron-sulfur subunit [Aspergillus oryzae RIB40]
AO090026000107	771	35.3989	259.277	2.87272	1.39911e-44	Up	2.65577e-45	NA	NA	NA	General function prediction only ;	K01104//protein-tyrosine phosphatase [EC:3.1.3.48]	gi|169774273|ref|XP_001821604.1|//hypothetical protein AOR_1_204014 [Aspergillus oryzae RIB40]
AO090701000513	387	0.460632	3.36695	2.86976	0.0461034	Up	0.0306083	GO:0043231//intracellular membrane-bounded organelle	GO:0046914//transition metal ion binding;GO:0003676//nucleic acid binding	NA	NA	K01581//ornithine decarboxylase [EC:4.1.1.17]	gi|83772085|dbj|BAE62215.1|//unnamed protein product [Aspergillus oryzae RIB40]
AO090003001319	819	82.4474	602.525	2.86947	3.0203e-80	Up	4.05097e-81	GO:0044424//intracellular part	GO:0032559//adenyl ribonucleotide binding;GO:0016301//kinase activity	GO:0009108//coenzyme biosynthetic process;GO:0006796//phosphate-containing compound metabolic process	Coenzyme transport and metabolism ;	K00859//dephospho-CoA kinase [EC:2.7.1.24]	gi|238485574|ref|XP_002374025.1|//dephospho-CoA kinase, putative [Aspergillus flavus NRRL3357]
AO090701000742	1369	3249.18	23681.6	2.86562	0	Up	0	NA	NA	NA	General function prediction only ;	K11294//nucleolin	gi|914760554|gb|KOC14369.1|//stress protein [Aspergillus flavus AF70];gi|317149611|ref|XP_001823541.2|//stress protein DDR48 [Aspergillus oryzae RIB40]
AO090023000878	1218	1.31309	9.5638	2.86462	0.00316201	Up	0.00183934	NA	GO:0008168//methyltransferase activity	GO:0006730//one-carbon metabolic process	NA	K17649//demethylsterigmatocystin 6-O-methyltransferase [EC:2.1.1.109]	gi|83769238|dbj|BAE59375.1|//unnamed protein product [Aspergillus oryzae RIB40]
AO090038000091	2724	47.7175	347.512	2.86447	9.50363e-60	Up	1.50739e-60	GO:0043231//intracellular membrane-bounded organelle;GO:0005634//nucleus	GO:0000981//RNA polymerase II transcription factor activity, sequence-specific DNA binding;GO:0046914//transition metal ion binding;GO:0008270//zinc ion binding;GO:0001071//nucleic acid binding transcription factor activity	GO:0006357//regulation of transcription from RNA polymerase II promoter;GO:0006351//transcription, DNA-templated	NA	K00852//ribokinase [EC:2.7.1.15];K10589//ubiquitin-protein ligase E3 C [EC:2.3.2.26];K09243//transcriptional regulatory protein UME6;K09245//transcriptional activator protein UGA3	gi|914762815|gb|KOC16630.1|//hypothetical protein AFLA70_656g000421 [Aspergillus flavus AF70]
AO090120000444	1536	2.5934	18.856	2.8621	7.23896e-05	Up	3.7191e-05	NA	GO:0046872//metal ion binding	NA	Secondary metabolites biosynthesis, transport and catabolism ;	K07824//benzoate 4-monooxygenase [EC:1.14.13.12]	gi|169779379|ref|XP_001824154.1|//benzoate 4-monooxygenase cytochrome P450 [Aspergillus oryzae RIB40]
AO090003000051	3021	530.54	3854.32	2.86094	0	Up	0	GO:0031224//intrinsic component of membrane	GO:0032559//adenyl ribonucleotide binding;GO:0019829//cation-transporting ATPase activity	GO:0009206//purine ribonucleoside triphosphate biosynthetic process;GO:0070838//divalent metal ion transport	Inorganic ion transport and metabolism ;	K05853//Ca2+ transporting ATPase, sarcoplasmic/endoplasmic reticulum [EC:3.6.3.8]	gi|169769641|ref|XP_001819290.1|//sarcoplasmic/endoplasmic reticulum calcium ATPase 1 [Aspergillus oryzae RIB40]
AO090701000457	957	2.38136	17.2934	2.86036	0.00016048	Up	8.42952e-05	NA	NA	NA	NA	K20368//protein cornichon;K12618//5'-3' exoribonuclease 1 [EC:3.1.13.-]	gi|83772037|dbj|BAE62167.1|//unnamed protein product [Aspergillus oryzae RIB40]
AO090023000010	1161	16.835	122.232	2.86008	4.56558e-22	Up	1.2638e-22	NA	NA	NA	NA	K00766//anthranilate phosphoribosyltransferase [EC:2.4.2.18]	gi|169772267|ref|XP_001820602.1|//hypothetical protein AOR_1_14144 [Aspergillus oryzae RIB40]
AO090102000064	1405	84.1537	610.405	2.85867	1.77887e-107	Up	1.95851e-108	NA	GO:0003824//catalytic activity;GO:0016491//oxidoreductase activity	GO:0008152//metabolic process;GO:0055114//oxidation-reduction process	Lipid transport and metabolism ; Secondary metabolites biosynthesis, transport and catabolism ; General function prediction only ;	K00065//2-deoxy-D-gluconate 3-dehydrogenase [EC:1.1.1.125]	gi|169775683|ref|XP_001822308.1|//gluconate 5-dehydrogenase [Aspergillus oryzae RIB40]
AO090011000324	939	169.537	1229.63	2.85856	3.00259e-228	Up	1.98459e-229	NA	NA	NA	NA	NA	gi|169783022|ref|XP_001825973.1|//hypothetical protein AOR_1_546054 [Aspergillus oryzae RIB40]
AO090023000623	2529	228.376	1651.78	2.85454	7.23525e-248	Up	4.41588e-249	NA	NA	NA	NA	K01568//pyruvate decarboxylase [EC:4.1.1.1];K14778//ATP-dependent RNA helicase DDX49/DBP8 [EC:3.6.4.13]	gi|83769008|dbj|BAE59145.1|//unnamed protein product [Aspergillus oryzae RIB40];gi|914764211|gb|KOC18020.1|//hypothetical protein AFLA70_141g002421 [Aspergillus flavus AF70]
AO090010000360	5235	386.406	2790.56	2.85236	0	Up	0	NA	NA	NA	NA	K03686//molecular chaperone DnaJ;K10675//cyanide hydratase [EC:4.2.1.66];K00218//protochlorophyllide reductase [EC:1.3.1.33]	gi|169785821|ref|XP_001827371.1|//hypothetical protein AOR_1_608024 [Aspergillus oryzae RIB40];gi|238506727|ref|XP_002384565.1|//conserved hypothetical protein [Aspergillus flavus NRRL3357]
AO090011000220	579	1.74844	12.6097	2.85039	0.00107822	Up	0.000603778	GO:0043231//intracellular membrane-bounded organelle	GO:0003676//nucleic acid binding;GO:0070566//adenylyltransferase activity	GO:0031123//RNA 3'-end processing	NA	NA	gi|169782856|ref|XP_001825890.1|//hypothetical protein AOR_1_366054 [Aspergillus oryzae RIB40]
AO090011000174	1603	147.048	1060.48	2.85036	3.68358e-183	Up	2.85517e-184	NA	GO:0003993//acid phosphatase activity;GO:0016791//phosphatase activity	GO:0016311//dephosphorylation	NA	K20048//actin cytoskeleton-regulatory complex protein END3;K01078//acid phosphatase [EC:3.1.3.2]	gi|83774595|dbj|BAE64718.1|//unnamed protein product [Aspergillus oryzae RIB40];gi|317157551|ref|XP_001825851.2|//histidine acid phosphatase [Aspergillus oryzae RIB40]
AO090010000170	1344	0.679153	4.89727	2.85017	0.0270916	Up	0.0174899	NA	GO:0016746//transferase activity, transferring acyl groups	GO:0005975//carbohydrate metabolic process;GO:0009060//aerobic respiration	Energy production and conversion ;	K01647//citrate synthase [EC:2.3.3.1]	gi|169785489|ref|XP_001827205.1|//citrate synthase [Aspergillus oryzae RIB40]
AO090011000698	1323	33.6114	242.331	2.84996	1.28256e-45	Up	2.38614e-46	NA	NA	NA	Transcription ;	K00108//choline dehydrogenase [EC:1.1.99.1];K19619//tyrosyl-DNA phosphodiesterase 2 [EC:3.1.4.-];K06123//1-acylglycerone phosphate reductase [EC:1.1.1.101];K06110//exocyst complex component 3	gi|83775032|dbj|BAE65155.1|//unnamed protein product [Aspergillus oryzae RIB40]
AO090010000132	690	72.3383	519.98	2.84562	2.68137e-90	Up	3.29278e-91	GO:0031966//mitochondrial membrane	GO:0048037//cofactor binding	GO:0008152//metabolic process	Cell wall/membrane/envelope biogenesis ; Carbohydrate transport and metabolism ;	K17290//oxidoreductase [EC:1.1.1.-]	gi|169785425|ref|XP_001827173.1|//protein fmp52 [Aspergillus oryzae RIB40]
AO090001000365	1113	11.5847	83.1773	2.84397	4.68887e-13	Up	1.67216e-13	NA	GO:0003824//catalytic activity	NA	General function prediction only ;	K00010//myo-inositol 2-dehydrogenase / D-chiro-inositol 1-dehydrogenase [EC:1.1.1.18 1.1.1.369]	gi|83766750|dbj|BAE56890.1|//unnamed protein product [Aspergillus oryzae RIB40]
AO090011000537	1229	851.137	6086.77	2.83821	0	Up	0	NA	GO:0016853//isomerase activity;GO:0003824//catalytic activity	GO:0008152//metabolic process	Lipid transport and metabolism ;	K07511//enoyl-CoA hydratase [EC:4.2.1.17]	gi|238493173|ref|XP_002377823.1|//enoyl-CoA hydratase/isomerase family protein [Aspergillus flavus NRRL3357];gi|83774900|dbj|BAE65023.1|//unnamed protein product [Aspergillus oryzae RIB40]
AO090010000154	1395	4.59239	32.812	2.83691	5.19812e-06	Up	2.48254e-06	NA	NA	NA	NA	NA	gi|83775939|dbj|BAE66058.1|//unnamed protein product [Aspergillus oryzae RIB40]
AO090020000381	1422	7.25988	51.837	2.83596	3.0047e-11	Up	1.14457e-11	NA	NA	NA	NA	K15393//beta-cyclopiazonate dehydrogenase [EC:1.21.99.1]	gi|169780490|ref|XP_001824709.1|//amine oxidase, flavin-containing superfamily [Aspergillus oryzae RIB40]
AO090005000478	1388	254.166	1814.03	2.83536	0	Up	0	NA	GO:0016407//acetyltransferase activity	NA	NA	K15361//WD repeat-containing protein 48;K10437//phenylacetate 2-hydroxylase [EC:1.14.13.-];K06123//1-acylglycerone phosphate reductase [EC:1.1.1.101];K01613//phosphatidylserine decarboxylase [EC:4.1.1.65];K14950//cation-transporting ATPase 13A1 [EC:3.6.3.-]	gi|317139484|ref|XP_001817538.2|//GNAT family acetyltransferase [Aspergillus oryzae RIB40];gi|83765393|dbj|BAE55536.1|//unnamed protein product [Aspergillus oryzae RIB40]
AO090023000473	828	5.97535	42.5948	2.83358	4.37083e-09	Up	1.8078e-09	NA	NA	NA	General function prediction only ; Signal transduction mechanisms ; Transcription ; Replication, recombination and repair ;	K01104//protein-tyrosine phosphatase [EC:3.1.3.48];K01488//adenosine deaminase [EC:3.5.4.4]	gi|169773097|ref|XP_001821017.1|//hypothetical protein AOR_1_804144 [Aspergillus oryzae RIB40]
AO090102000060	5473	18.9496	134.847	2.83108	3.57097e-18	Up	1.09664e-18	GO:0016021//integral component of membrane	GO:0008484//sulfuric ester hydrolase activity;GO:0003824//catalytic activity	GO:0008152//metabolic process	NA	NA	gi|83771039|dbj|BAE61171.1|//unnamed protein product [Aspergillus oryzae RIB40];gi|317147815|ref|XP_001822303.2|//hypothetical protein AOR_1_100134 [Aspergillus oryzae RIB40]
AO090010000365	456	1.55365	11.0269	2.8273	0.00265461	Up	0.00153441	NA	NA	NA	NA	NA	gi|238506731|ref|XP_002384567.1|//conserved hypothetical protein [Aspergillus flavus NRRL3357];gi|83776123|dbj|BAE66242.1|//unnamed protein product [Aspergillus oryzae RIB40]
AO090010000727	5258	35.2996	250.04	2.82444	2.93043e-44	Up	5.58407e-45	NA	NA	NA	NA	K17648//versiconal hemiacetal acetate esterase [EC:3.1.1.94]	gi|83776425|dbj|BAE66544.1|//unnamed protein product [Aspergillus oryzae RIB40]
AO090026000245	1587	794.523	5608.33	2.81941	0	Up	0	NA	GO:0016769//transferase activity, transferring nitrogenous groups;GO:0048037//cofactor binding	GO:0008152//metabolic process	Transcription ; Amino acid transport and metabolism ;	K00838//aromatic amino acid aminotransferase I [EC:2.6.1.57 2.6.1.27 2.6.1.5]	gi|169774521|ref|XP_001821728.1|//L-kynurenine/alpha-aminoadipate aminotransferase [Aspergillus oryzae RIB40]
AO090005000903	945	4.06969	28.6634	2.81622	1.01725e-06	Up	4.69436e-07	NA	GO:0016836//hydro-lyase activity	NA	Lipid transport and metabolism ;	K07511//enoyl-CoA hydratase [EC:4.2.1.17]	gi|169766880|ref|XP_001817911.1|//enoyl-CoA hydratase/isomerase family protein [Aspergillus oryzae RIB40]
AO090012000430	369	40.5306	285.188	2.81483	1.51978e-43	Up	2.92819e-44	GO:0031224//intrinsic component of membrane	NA	GO:0006810//transport	Intracellular trafficking, secretion, and vesicular transport ;	K08513//vesicle-associated membrane protein 4	gi|83770475|dbj|BAE60608.1|//unnamed protein product [Aspergillus oryzae RIB40]
AO090001000159	858	9.79114	68.8634	2.81419	4.36359e-14	Up	1.50153e-14	NA	GO:0003824//catalytic activity	NA	General function prediction only ;	NA	gi|169768480|ref|XP_001818710.1|//Zn2+ dependent hydrolase [Aspergillus oryzae RIB40]
BGI_novel_G000161	2016	55.8834	393.011	2.81408	5.42313e-74	Up	7.62823e-75	GO:0016021//integral component of membrane	GO:0015171//amino acid transmembrane transporter activity	GO:0003333//amino acid transmembrane transport	NA	K19564//choline transport protein	gi|317157783|ref|XP_003190878.1|//amino acid transporter [Aspergillus oryzae RIB40]
AO090701000508	2194	50.8757	357.418	2.81256	3.03359e-58	Up	4.90379e-59	NA	GO:0016616//oxidoreductase activity, acting on the CH-OH group of donors, NAD or NADP as acceptor;GO:0046914//transition metal ion binding;GO:0008270//zinc ion binding;GO:0051907//S-(hydroxymethyl)glutathione synthase activity;GO:0051903//S-(hydroxymethyl)glutathione dehydrogenase activity	GO:0006067//ethanol metabolic process;GO:0006069//ethanol oxidation;GO:0046294//formaldehyde catabolic process	Energy production and conversion ;	K00121//S-(hydroxymethyl)glutathione dehydrogenase / alcohol dehydrogenase [EC:1.1.1.284 1.1.1.1]	gi|83772080|dbj|BAE62210.1|//unnamed protein product [Aspergillus oryzae RIB40];gi|914757475|gb|KOC11567.1|//putative alcohol dehydrogenase [Aspergillus flavus AF70]
AO090701000826	7584	213.487	1496.84	2.8097	5.77801e-236	Up	3.7286e-237	NA	GO:0022892//substrate-specific transporter activity;GO:0016746//transferase activity, transferring acyl groups;GO:0019842//vitamin binding;GO:0046914//transition metal ion binding	GO:0008152//metabolic process	Secondary metabolites biosynthesis, transport and catabolism ;	K15394//hybrid polyketide synthase / nonribosomal peptide synthetase ACE1;K15419//emericellamide biosynthesis, highly reducing iterative type I polyketide synthase	gi|83772350|dbj|BAE62480.1|//unnamed protein product [Aspergillus oryzae RIB40]
AO090009000388	3926	156.937	1097.25	2.80564	2.35367e-168	Up	1.94135e-169	NA	GO:0003677//DNA binding;GO:0003676//nucleic acid binding	NA	NA	K05747//Wiskott-Aldrich syndrome protein	gi|317138369|ref|XP_001816858.2|//hypothetical protein AOR_1_640184 [Aspergillus oryzae RIB40];gi|83764712|dbj|BAE54856.1|//unnamed protein product [Aspergillus oryzae RIB40]
AO090011000598	2124	568.302	3970.41	2.80456	0	Up	0	NA	GO:0004084//branched-chain-amino-acid transaminase activity;GO:0052654//L-leucine transaminase activity;GO:0052656//L-isoleucine transaminase activity;GO:0052655//L-valine transaminase activity	GO:0008652//cellular amino acid biosynthetic process;GO:0009082//branched-chain amino acid biosynthetic process	Amino acid transport and metabolism ; Coenzyme transport and metabolism ;	K00826//branched-chain amino acid aminotransferase [EC:2.6.1.42]	gi|238493289|ref|XP_002377881.1|//branched-chain amino acid aminotransferase, cytosolic [Aspergillus flavus NRRL3357];gi|83774950|dbj|BAE65073.1|//unnamed protein product [Aspergillus oryzae RIB40]
AO090005000274	2088	370.88	2587.05	2.80229	0	Up	0	GO:0031224//intrinsic component of membrane;GO:0019866//organelle inner membrane	GO:0046872//metal ion binding	GO:0006810//transport	NA	K15105//solute carrier family 25 (mitochondrial aspartate/glutamate transporter), member 12/13	gi|391864555|gb|EIT73850.1|//aspartate/glutamate carrier protein Aralar/Citrin [Aspergillus oryzae 3.042]
AO090009000133	1728	15.8355	110.348	2.80082	6.60115e-18	Up	2.04178e-18	GO:0043231//intracellular membrane-bounded organelle	GO:0046914//transition metal ion binding;GO:0001071//nucleic acid binding transcription factor activity	GO:0006351//transcription, DNA-templated	NA	K09246//arginine metabolism regulation protein II;K01824//cholestenol Delta-isomerase [EC:5.3.3.5]	gi|169764339|ref|XP_001816641.1|//hypothetical protein AOR_1_224184 [Aspergillus oryzae RIB40]
AO090010000350	2007	76.4137	532.363	2.80051	2.39204e-85	Up	3.05199e-86	GO:0044464//cell part	NA	GO:0006810//transport	Carbohydrate transport and metabolism ; Amino acid transport and metabolism ; Inorganic ion transport and metabolism ; General function prediction only ;	K08157//MFS transporter, DHA1 family, multidrug resistance protein	gi|83776109|dbj|BAE66228.1|//unnamed protein product [Aspergillus oryzae RIB40]
AO090020000657	1362	2.57705	17.8529	2.79237	8.98159e-05	Up	4.64003e-05	NA	NA	GO:0006810//transport	Carbohydrate transport and metabolism ; Amino acid transport and metabolism ; Inorganic ion transport and metabolism ; General function prediction only ;	K17866//diphthamide biosynthesis protein 2;K00276//primary-amine oxidase [EC:1.4.3.21];K02835//peptide chain release factor 1;K11231//osomolarity two-component system, sensor histidine kinase SLN1 [EC:2.7.13.3]	gi|169780948|ref|XP_001824938.1|//oxalate/formate antiporter [Aspergillus oryzae RIB40]
AO090010000424	1029	1.52374	10.5508	2.79167	0.00225508	Up	0.00129497	NA	GO:0033764//steroid dehydrogenase activity, acting on the CH-OH group of donors, NAD or NADP as acceptor	GO:0008202//steroid metabolic process	Cell wall/membrane/envelope biogenesis ; Carbohydrate transport and metabolism ;	K17741//NADPH-dependent methylglyoxal reductase [EC:1.1.1.283]	gi|169785915|ref|XP_001827418.1|//dihydroflavonal-4-reductase [Aspergillus oryzae RIB40]
AO090701000548	1854	19.5996	135.644	2.79093	7.60715e-26	Up	1.93978e-26	GO:0031224//intrinsic component of membrane;GO:0016021//integral component of membrane	NA	NA	Amino acid transport and metabolism ;	K14209//solute carrier family 36 (proton-coupled amino acid transporter);K00606//3-methyl-2-oxobutanoate hydroxymethyltransferase [EC:2.1.2.11];K15015//solute carrier family 32 (vesicular inhibitory amino acid transporter)	gi|83772116|dbj|BAE62246.1|//unnamed protein product [Aspergillus oryzae RIB40];gi|238495056|ref|XP_002378764.1|//neutral amino acid permease, putative [Aspergillus flavus NRRL3357]
AO090003000230	324	1.09218	7.4969	2.77908	0.00907429	Up	0.00551825	NA	GO:0016407//acetyltransferase activity	NA	Transcription ; General function prediction only ;	K19952//guanine nucleotide exchange factor	gi|83767301|dbj|BAE57440.1|//unnamed protein product [Aspergillus oryzae RIB40]
AO090009000217	789	255.708	1751.05	2.77565	0	Up	0	NA	GO:0008875//gluconate dehydrogenase activity	GO:0008152//metabolic process	Lipid transport and metabolism ; Secondary metabolites biosynthesis, transport and catabolism ; General function prediction only ;	K00065//2-deoxy-D-gluconate 3-dehydrogenase [EC:1.1.1.125]	gi|169764477|ref|XP_001816710.1|//oxidoreductase, short-chain dehydrogenase/reductase family [Aspergillus oryzae RIB40]
AO090023000416	1689	122.272	832.163	2.76677	3.13552e-143	Up	2.85179e-144	GO:0043231//intracellular membrane-bounded organelle;GO:0005634//nucleus	GO:0000981//RNA polymerase II transcription factor activity, sequence-specific DNA binding;GO:0046914//transition metal ion binding;GO:0008270//zinc ion binding;GO:0001071//nucleic acid binding transcription factor activity	GO:0006357//regulation of transcription from RNA polymerase II promoter;GO:0006351//transcription, DNA-templated	NA	K00681//gamma-glutamyltranspeptidase / glutathione hydrolase [EC:2.3.2.2 3.4.19.13];K01824//cholestenol Delta-isomerase [EC:5.3.3.5];K20792//N-alpha-acetyltransferase 15/16, NatA auxiliary subunit;K09245//transcriptional activator protein UGA3	gi|83768828|dbj|BAE58965.1|//unnamed protein product [Aspergillus oryzae RIB40];gi|238490930|ref|XP_002376702.1|//conserved hypothetical protein [Aspergillus flavus NRRL3357]
AO090012000460	1920	1.10021	7.46917	2.76317	0.0101032	Up	0.00617278	NA	GO:0016491//oxidoreductase activity	GO:0008152//metabolic process	Coenzyme transport and metabolism ; Energy production and conversion ;	K03380//phenol 2-monooxygenase [EC:1.14.13.7]	gi|83770502|dbj|BAE60635.1|//unnamed protein product [Aspergillus oryzae RIB40]
AO090003000680	1987	603.463	4096.7	2.76312	0	Up	0	GO:0016021//integral component of membrane	GO:0004553//hydrolase activity, hydrolyzing O-glycosyl compounds;GO:0004568//chitinase activity;GO:0043167//ion binding	GO:0006032//chitin catabolic process;GO:0005975//carbohydrate metabolic process;GO:0006026//aminoglycan catabolic process	Carbohydrate transport and metabolism ;	K01183//chitinase [EC:3.2.1.14]	gi|238486820|ref|XP_002374648.1|//class V chitinase, putative [Aspergillus flavus NRRL3357];gi|83767689|dbj|BAE57828.1|//unnamed protein product [Aspergillus oryzae RIB40]
AO090003000361	1981	211.907	1438.19	2.76276	3.33902e-240	Up	2.12704e-241	GO:0005634//nucleus	GO:0003677//DNA binding;GO:0000981//RNA polymerase II transcription factor activity, sequence-specific DNA binding;GO:0008270//zinc ion binding	GO:0006357//regulation of transcription from RNA polymerase II promoter	NA	K03457//nucleobase:cation symporter-1, NCS1 family;K01427//urease [EC:3.5.1.5]	gi|83767409|dbj|BAE57548.1|//unnamed protein product [Aspergillus oryzae RIB40];gi|914752879|gb|KOC07067.1|//fungal specific transcription factor domain protein [Aspergillus flavus AF70]
AO090011000209	741	38.938	264.009	2.76134	2.10729e-38	Up	4.36667e-39	NA	GO:0003824//catalytic activity	GO:0008152//metabolic process	Lipid transport and metabolism ; Secondary metabolites biosynthesis, transport and catabolism ; General function prediction only ;	K17644//norsolorinic acid ketoreductase [EC:1.1.1.349]	gi|169782838|ref|XP_001825881.1|//hydroxyacyl dehydrogenase [Aspergillus oryzae RIB40]
AO090701000639	2250	51.2343	346.178	2.75633	2.55773e-63	Up	3.93207e-64	NA	GO:0005488//binding;GO:0016798//hydrolase activity, acting on glycosyl bonds	GO:0044238//primary metabolic process	Carbohydrate transport and metabolism ;	K01811//alpha-D-xyloside xylohydrolase [EC:3.2.1.177]	gi|169777981|ref|XP_001823456.1|//alpha-xylosidase [Aspergillus oryzae RIB40]
AO090003001049	1953	756.98	5086.91	2.74846	0	Up	0	NA	NA	NA	NA	NA	gi|169771369|ref|XP_001820154.1|//Leucine Rich Repeat domain protein [Aspergillus oryzae RIB40]
AO090003000141	1974	422.92	2839.49	2.74717	0	Up	0	NA	NA	NA	NA	NA	gi|83767227|dbj|BAE57366.1|//unnamed protein product [Aspergillus oryzae RIB40];gi|238487874|ref|XP_002375175.1|//conserved hypothetical protein [Aspergillus flavus NRRL3357]
AO090003001122	726	108.992	728.814	2.74132	2.94051e-130	Up	2.85579e-131	NA	NA	NA	Coenzyme transport and metabolism ;	NA	gi|238485932|ref|XP_002374204.1|//DlpA domain protein [Aspergillus flavus NRRL3357]
AO090005000634	4060	87.5035	583.041	2.73618	6.84593e-102	Up	7.84606e-103	GO:0031224//intrinsic component of membrane;GO:0016021//integral component of membrane	NA	NA	NA	K14209//solute carrier family 36 (proton-coupled amino acid transporter);K00606//3-methyl-2-oxobutanoate hydroxymethyltransferase [EC:2.1.2.11];K15015//solute carrier family 32 (vesicular inhibitory amino acid transporter)	gi|83765533|dbj|BAE55676.1|//unnamed protein product [Aspergillus oryzae RIB40];gi|972231464|emb|CEL08358.1|//Putative Neutral amino acid permease [Aspergillus calidoustus]
AO090011000007	1180	81.781	544.218	2.73435	1.65035e-97	Up	1.95374e-98	GO:0016021//integral component of membrane	NA	NA	NA	NA	gi|317156381|ref|XP_001825704.2|//hypothetical protein AOR_1_4054 [Aspergillus oryzae RIB40];gi|83774448|dbj|BAE64571.1|//unnamed protein product [Aspergillus oryzae RIB40]
AO090011000058	1116	2.37429	15.7754	2.7321	0.000342484	Up	0.000184373	NA	NA	NA	Cell wall/membrane/envelope biogenesis ; General function prediction only ;	K01684//galactonate dehydratase [EC:4.2.1.6]	gi|169782576|ref|XP_001825750.1|//mandelate racemase [Aspergillus oryzae RIB40]
AO090023000337	1116	340.73	2261.9	2.73083	0	Up	0	NA	NA	NA	NA	NA	gi|169772859|ref|XP_001820898.1|//hypothetical protein AOR_1_580144 [Aspergillus oryzae RIB40]
AO090701000876	2337	3.85505	25.5138	2.72645	4.71361e-06	Up	2.2442e-06	NA	NA	NA	NA	NA	gi|169778387|ref|XP_001823659.1|//hypothetical protein AOR_1_1534114 [Aspergillus oryzae RIB40]
AO090701000725	933	1624.83	10750.1	2.72599	0	Up	0	NA	NA	GO:0009108//coenzyme biosynthetic process	Coenzyme transport and metabolism ;	K06215//pyridoxal 5'-phosphate synthase pdxS subunit [EC:4.3.3.6]	gi|169778123|ref|XP_001823527.1|//pyridoxine biosynthesis protein pyroA [Aspergillus oryzae RIB40]
AO090103000260	771	0.901592	5.95883	2.72448	0.021785	Up	0.0138816	NA	NA	NA	NA	NA	gi|83775589|dbj|BAE65709.1|//unnamed protein product [Aspergillus oryzae RIB40]
AO090023000056	1916	2007.88	13253.4	2.72262	0	Up	0	GO:0016021//integral component of membrane	NA	NA	NA	K19356//cellulase [EC:3.2.1.4]	gi|317145274|ref|XP_001820644.2|//hypothetical protein AOR_1_96144 [Aspergillus oryzae RIB40];gi|83768506|dbj|BAE58643.1|//unnamed protein product [Aspergillus oryzae RIB40]
AO090009000135	1525	4.5086	29.605	2.71509	4.01439e-06	Up	1.90649e-06	NA	GO:0003824//catalytic activity	GO:0008152//metabolic process	Energy production and conversion ;	K00139//succinate-semialdehyde dehydrogenase [EC:1.2.1.24];K00135//succinate-semialdehyde dehydrogenase / glutarate-semialdehyde dehydrogenase [EC:1.2.1.16 1.2.1.79 1.2.1.20]	gi|584128919|gb|EWG38324.1|//succinate-semialdehyde dehydrogenase [Fusarium verticillioides 7600];gi|83764497|dbj|BAE54641.1|//unnamed protein product [Aspergillus oryzae RIB40]
AO090005000372	767	19.1385	125.16	2.70923	5.83225e-24	Up	1.54893e-24	NA	NA	NA	NA	K17945//tropomyosin, fungi type	gi|238482561|ref|XP_002372519.1|//Tropomyosin-1, putative [Aspergillus flavus NRRL3357];gi|317139341|ref|XP_001817445.2|//tropomyosin-1 [Aspergillus oryzae RIB40]
AO090026000708	868	2934.44	19174.4	2.70803	0	Up	0	GO:0005623//cell	GO:0015036//disulfide oxidoreductase activity;GO:0015035//protein disulfide oxidoreductase activity	GO:0006662//glycerol ether metabolic process;GO:0019725//cellular homeostasis;GO:0018904//ether metabolic process;GO:0055114//oxidation-reduction process;GO:0045454//cell redox homeostasis	Posttranslational modification, protein turnover, chaperones ; Energy production and conversion ;	K03671//thioredoxin 1	gi|169775305|ref|XP_001822120.1|//thioredoxin [Aspergillus oryzae RIB40];gi|391873015|gb|EIT82090.1|//thioredoxin [Aspergillus oryzae 3.042]
AO090001000456	633	6894.93	44972.6	2.70544	0	Up	0	NA	NA	NA	General function prediction only ;	NA	gi|169769012|ref|XP_001818976.1|//high expression lethality protein Hel10 [Aspergillus oryzae RIB40]
AO090010000024	954	5.183	33.7049	2.7011	9.112e-07	Up	4.19406e-07	GO:0031224//intrinsic component of membrane	NA	GO:0051234//establishment of localization	Carbohydrate transport and metabolism ;	K09885//aquaporin rerated protein, other eukaryote	gi|83775824|dbj|BAE65943.1|//unnamed protein product [Aspergillus oryzae RIB40]
AO090020000258	585	1.56136	10.1386	2.69898	0.00607277	Up	0.00362309	NA	NA	NA	NA	NA	gi|83773346|dbj|BAE63473.1|//unnamed protein product [Aspergillus oryzae RIB40]
AO090701000577	954	1.9576	12.6681	2.69405	0.00125594	Up	0.000706993	NA	NA	NA	General function prediction only ;	K10599//pre-mRNA-processing factor 19 [EC:2.3.2.27]	gi|169777877|ref|XP_001823404.1|//phenazine biosynthesis-like protein [Aspergillus oryzae RIB40]
AO090009000414	1827	63.9191	413.369	2.69311	3.99618e-50	Up	7.04105e-51	NA	GO:0016836//hydro-lyase activity	GO:0008652//cellular amino acid biosynthetic process;GO:0006549//isoleucine metabolic process;GO:0006573//valine metabolic process	Amino acid transport and metabolism ; Carbohydrate transport and metabolism ;	K01687//dihydroxy-acid dehydratase [EC:4.2.1.9]	gi|169764815|ref|XP_001816879.1|//dihydroxy-acid dehydratase [Aspergillus oryzae RIB40]
AO090005000082	786	44.8821	290.006	2.69187	4.05957e-52	Up	6.99578e-53	NA	NA	NA	NA	NA	gi|169765458|ref|XP_001817200.1|//hypothetical protein AOR_1_148174 [Aspergillus oryzae RIB40]
AO090701000743	2609	135.874	877.28	2.69077	1.51216e-146	Up	1.35305e-147	GO:0016021//integral component of membrane	NA	GO:0006810//transport;GO:0055085//transmembrane transport	Carbohydrate transport and metabolism ; Amino acid transport and metabolism ; Inorganic ion transport and metabolism ; General function prediction only ;	K08192//MFS transporter, ACS family, allantoate permease	gi|629669775|ref|XP_007796839.1|//putative cysteine transporter protein [Eutypa lata UCREL1];gi|391872246|gb|EIT81380.1|//permease of the major facilitator superfamily [Aspergillus oryzae 3.042]
AO090001000142	2418	39.9162	257.719	2.69075	7.42655e-45	Up	1.40013e-45	NA	NA	NA	General function prediction only ;	K00706//1,3-beta-glucan synthase [EC:2.4.1.34];K06694//26S proteasome non-ATPase regulatory subunit 10;K00688//glycogen phosphorylase [EC:2.4.1.1];K17427//large subunit ribosomal protein L46;K01930//folylpolyglutamate synthase [EC:6.3.2.17]	gi|169768446|ref|XP_001818693.1|//hypothetical protein AOR_1_1386164 [Aspergillus oryzae RIB40]
AO090012000239	6039	1576.65	10179.6	2.69075	0	Up	0	NA	GO:0019787//ubiquitin-like protein transferase activity;GO:0046914//transition metal ion binding;GO:0008270//zinc ion binding;GO:0004842//ubiquitin-protein transferase activity	GO:0032446//protein modification by small protein conjugation;GO:0016567//protein ubiquitination	NA	K08501//syntaxin 8	gi|317136786|ref|XP_001727289.2|//TRAF-like signal transducer [Aspergillus oryzae RIB40];gi|83770317|dbj|BAE60450.1|//unnamed protein product [Aspergillus oryzae RIB40]
AO090005000044	1629	2.36946	15.2875	2.68972	0.000400013	Up	0.000216522	GO:0031224//intrinsic component of membrane	GO:0022857//transmembrane transporter activity	GO:0071702//organic substance transport	Carbohydrate transport and metabolism ; Amino acid transport and metabolism ; Inorganic ion transport and metabolism ; General function prediction only ;	K08139//MFS transporter, SP family, sugar:H+ symporter	gi|169765390|ref|XP_001817166.1|//sugar transporter [Aspergillus oryzae RIB40]
AO090120000179	2043	1945.52	12533.3	2.68754	0	Up	0	NA	GO:0016833//oxo-acid-lyase activity;GO:0004451//isocitrate lyase activity	GO:0019752//carboxylic acid metabolic process;GO:0043436//oxoacid metabolic process	Energy production and conversion ;	K01637//isocitrate lyase [EC:4.1.3.1]	gi|229359371|emb|CAW40752.1|//methylisocitrate lyase precursor [Aspergillus fumigatus];gi|83772665|dbj|BAE62793.1|//unnamed protein product [Aspergillus oryzae RIB40]
AO090011000104	1929	138.274	889.628	2.68567	2.57789e-141	Up	2.35886e-142	NA	GO:0016787//hydrolase activity;GO:0003824//catalytic activity	GO:0008152//metabolic process	NA	K00854//xylulokinase [EC:2.7.1.17];K01956//carbamoyl-phosphate synthase small subunit [EC:6.3.5.5];K14778//ATP-dependent RNA helicase DDX49/DBP8 [EC:3.6.4.13]	gi|317156508|ref|XP_001825790.2|//esterase [Aspergillus oryzae RIB40];gi|83774534|dbj|BAE64657.1|//unnamed protein product [Aspergillus oryzae RIB40]
AO090038000117	324	0.689162	4.4285	2.6839	0.042137	Up	0.0277771	NA	NA	NA	NA	NA	gi|169781254|ref|XP_001825090.1|//hypothetical protein AOR_1_198074 [Aspergillus oryzae RIB40]
AO090020000667	3112	319.207	2050.13	2.68315	0	Up	0	GO:0016021//integral component of membrane	GO:0016616//oxidoreductase activity, acting on the CH-OH group of donors, NAD or NADP as acceptor;GO:0051287//NAD binding;GO:0022891//substrate-specific transmembrane transporter activity	GO:0008643//carbohydrate transport;GO:0055085//transmembrane transport;GO:0055114//oxidation-reduction process	NA	K08139//MFS transporter, SP family, sugar:H+ symporter	gi|83773685|dbj|BAE63812.1|//unnamed protein product [Aspergillus oryzae RIB40];gi|992075754|ref|XP_015401418.1|//hypothetical protein ANOM_010489 [Aspergillus nomius NRRL 13137]
AO090003001009	1518	157.264	1008.73	2.68127	9.98991e-142	Up	9.1227e-143	NA	GO:0004620//phospholipase activity;GO:0016849//phosphorus-oxygen lyase activity;GO:0042578//phosphoric ester hydrolase activity	GO:0007165//signal transduction;GO:0044238//primary metabolic process	NA	K01771//1-phosphatidylinositol phosphodiesterase [EC:4.6.1.13]	gi|83767978|dbj|BAE58117.1|//unnamed protein product [Aspergillus oryzae RIB40]
AO090005000444	1347	256.833	1643.89	2.67821	8.45157e-225	Up	5.6795e-226	NA	GO:0008443//phosphofructokinase activity;GO:0019203//carbohydrate phosphatase activity;GO:0032559//adenyl ribonucleotide binding	GO:0006000//fructose metabolic process	Carbohydrate transport and metabolism ;	K19029//6-phosphofructo-2-kinase / fructose-2,6-biphosphatase 2 [EC:2.7.1.105 3.1.3.46]	gi|169766078|ref|XP_001817510.1|//fructose-2,6-bisphosphatase [Aspergillus oryzae RIB40]
AO090701000612	1383	84.3069	538.297	2.67468	4.82219e-96	Up	5.74863e-97	GO:0015630//microtubule cytoskeleton	GO:0032559//adenyl ribonucleotide binding;GO:0003774//motor activity	GO:0007017//microtubule-based process	Cytoskeleton ;	K10395//kinesin family member 4/21/27	gi|169777939|ref|XP_001823435.1|//kinesin family protein [Aspergillus oryzae RIB40]
AO090102000627	1425	3998.65	25518.3	2.67395	0	Up	0	GO:0044429//mitochondrial part	GO:0046912//transferase activity, transferring acyl groups, acyl groups converted into alkyl on transfer	GO:0005975//carbohydrate metabolic process;GO:0009060//aerobic respiration	Energy production and conversion ;	K01647//citrate synthase [EC:2.3.3.1]	gi|169776615|ref|XP_001822774.1|//citrate synthase [Aspergillus oryzae RIB40]
AO090003000242	702	0.694913	4.42367	2.67034	0.0455923	Up	0.0302396	NA	NA	NA	NA	K05991//endoglycosylceramidase [EC:3.2.1.123]	gi|83767311|dbj|BAE57450.1|//unnamed protein product [Aspergillus oryzae RIB40]
AO090026000047	386	0.695832	4.4293	2.67027	0.0463465	Up	0.0307782	NA	NA	NA	NA	NA	gi|83769410|dbj|BAE59545.1|//unnamed protein product [Aspergillus oryzae RIB40];gi|391872169|gb|EIT81305.1|//hypothetical protein Ao3042_02169 [Aspergillus oryzae 3.042]
AO090005000631	747	95.8287	609.769	2.66973	7.06048e-102	Up	8.09846e-103	NA	NA	NA	NA	NA	gi|169766408|ref|XP_001817675.1|//hypothetical protein AOR_1_1106174 [Aspergillus oryzae RIB40]
AO090701000471	1184	3930.96	24990.6	2.66843	0	Up	0	NA	NA	NA	Carbohydrate transport and metabolism ;	K01183//chitinase [EC:3.2.1.14]	gi|83772051|dbj|BAE62181.1|//unnamed protein product [Aspergillus oryzae RIB40];gi|918825151|ref|XP_013430263.1|//hypothetical protein M436DRAFT_61136 [Aureobasidium namibiae CBS 147.97]
AO090001000073	747	1.74197	11.0694	2.66779	0.00301505	Up	0.00175108	NA	NA	NA	NA	K20475//protein transport protein SEC39	gi|914753133|gb|KOC07314.1|//secretory phospholipase A2 [Aspergillus flavus AF70]
AO090003001550	4075	63.975	406.44	2.66746	1.4727e-70	Up	2.13794e-71	NA	NA	NA	NA	NA	gi|238485140|ref|XP_002373808.1|//conserved hypothetical protein [Aspergillus flavus NRRL3357];gi|83768445|dbj|BAE58584.1|//unnamed protein product [Aspergillus oryzae RIB40]
AO090102000243	5896	116.877	742.151	2.66672	2.05579e-123	Up	2.07225e-124	NA	NA	NA	NA	NA	gi|914757347|gb|KOC11452.1|//hypothetical protein AFLA70_483g000432 [Aspergillus flavus AF70];gi|83771193|dbj|BAE61325.1|//unnamed protein product [Aspergillus oryzae RIB40]
AO090010000699	4297	200.493	1271.07	2.66442	2.72531e-202	Up	1.98697e-203	GO:0031224//intrinsic component of membrane;GO:0016021//integral component of membrane	GO:0005275//amine transmembrane transporter activity;GO:0015171//amino acid transmembrane transporter activity	GO:0006865//amino acid transport;GO:0003333//amino acid transmembrane transport	Amino acid transport and metabolism ;	K19564//choline transport protein	gi|700450481|gb|KGO40578.1|//Amino acid/polyamine transporter I [Penicillium expansum];gi|83776399|dbj|BAE66518.1|//unnamed protein product [Aspergillus oryzae RIB40]
AO090011000156	1899	12.7602	80.8673	2.6639	2.85333e-15	Up	9.48745e-16	NA	GO:0016787//hydrolase activity	NA	General function prediction only ;	K00698//chitin synthase [EC:2.4.1.16];K08329//autophagy-related protein 17	gi|317156563|ref|XP_001825837.2|//proteinase [Aspergillus oryzae RIB40];gi|635505785|gb|KDE77843.1|//alpha/beta hydorlase superfamily protein [Aspergillus oryzae 100-8]
AO090003001238	1701	693.756	4369.64	2.65501	0	Up	0	GO:0031224//intrinsic component of membrane;GO:0031966//mitochondrial membrane	NA	NA	NA	K17775//mitochondrial distribution and morphology protein 34	gi|169771685|ref|XP_001820312.1|//distribution and morphology protein 34 [Aspergillus oryzae RIB40]
AO09M000000005	810	2.58224	16.2627	2.65487	0.000329688	Up	0.000177302	GO:0031224//intrinsic component of membrane;GO:0043231//intracellular membrane-bounded organelle	GO:0015002//heme-copper terminal oxidase activity	GO:0022904//respiratory electron transport chain	Energy production and conversion ;	K02262//cytochrome c oxidase subunit 3	gi|380702230|gb|AFD95999.1|//cytochrome oxidase subunit 3 (mitochondrion) [Aspergillus oryzae]
AO090102000108	597	1.51628	9.53158	2.65218	0.00462805	Up	0.00273474	NA	NA	NA	NA	K20247//hercynylcysteine sulfoxide lyase [EC:4.4.1.-]	gi|169775761|ref|XP_001822347.1|//hypothetical protein AOR_1_1128134 [Aspergillus oryzae RIB40]
AO090011000722	690	313.715	1966.85	2.64836	2.95666e-281	Up	1.63034e-282	NA	NA	NA	Carbohydrate transport and metabolism ;	NA	gi|83775051|dbj|BAE65174.1|//unnamed protein product [Aspergillus oryzae RIB40]
AO090003000807	1878	45.3794	284.412	2.64787	4.57952e-37	Up	9.71298e-38	GO:0043231//intracellular membrane-bounded organelle	NA	GO:0050658//RNA transport	NA	K14284//nuclear RNA export factor	gi|83767802|dbj|BAE57941.1|//unnamed protein product [Aspergillus oryzae RIB40]
AO090003000698	5260	752.978	4716.31	2.64698	0	Up	0	GO:0005739//mitochondrion;GO:0030956//glutamyl-tRNA(Gln) amidotransferase complex	GO:0016879//ligase activity, forming carbon-nitrogen bonds;GO:0005524//ATP binding;GO:0050567//glutaminyl-tRNA synthase (glutamine-hydrolyzing) activity	GO:0010467//gene expression;GO:0032543//mitochondrial translation;GO:0070681//glutaminyl-tRNAGln biosynthesis via transamidation	Translation, ribosomal structure and biogenesis ;	K02434//aspartyl-tRNA(Asn)/glutamyl-tRNA(Gln) amidotransferase subunit B [EC:6.3.5.6 6.3.5.7]	gi|238486782|ref|XP_002374629.1|//glutamyl-tRNA(Gln) amidotransferase, B subunit [Aspergillus flavus NRRL3357];gi|317144015|ref|XP_001819847.2|//glutamyl-tRNA(Gln) amidotransferase subunit B [Aspergillus oryzae RIB40]
AO090012001027	1218	292.424	1829.31	2.64517	2.23029e-225	Up	1.49261e-226	NA	NA	NA	NA	NA	gi|83770984|dbj|BAE61117.1|//unnamed protein product [Aspergillus oryzae RIB40]
AO090023000227	1407	587.978	3674.38	2.64367	0	Up	0	NA	GO:0046914//transition metal ion binding	NA	General function prediction only ;	K06874//zinc finger protein	gi|169772665|ref|XP_001820801.1|//zinc finger protein ZPR1 [Aspergillus oryzae RIB40]
AO090701000622	1740	328.681	2053.27	2.64317	4.93548e-306	Up	2.59882e-307	GO:0016020//membrane	NA	NA	Amino acid transport and metabolism ;	K14209//solute carrier family 36 (proton-coupled amino acid transporter)	gi|169777957|ref|XP_001823444.1|//amino acid transporter [Aspergillus oryzae RIB40]
AO090020000461	2412	8.75718	54.5778	2.63977	2.83668e-10	Up	1.12261e-10	NA	NA	NA	NA	NA	gi|83773518|dbj|BAE63645.1|//unnamed protein product [Aspergillus oryzae RIB40];gi|317151606|ref|XP_003190541.1|//hypothetical protein AOR_1_812084 [Aspergillus oryzae RIB40]
AO090003000486	2412	334.116	2062.87	2.62623	0	Up	0	GO:0005634//nucleus;GO:0005829//cytosol	NA	NA	General function prediction only ;	K10570//DNA excision repair protein ERCC-8;K14848//ribosome assembly protein RRB1;K06666//glucose repression regulatory protein TUP1;K14026//SEL1 protein	gi|317143736|ref|XP_001819664.2|//WD domain protein [Aspergillus oryzae RIB40];gi|83767523|dbj|BAE57662.1|//unnamed protein product [Aspergillus oryzae RIB40]
AO090120000501	498	5.0318	31.0504	2.62547	7.62975e-05	Up	3.9269e-05	NA	NA	NA	NA	K14536//ribosome assembly protein 1 [EC:3.6.5.-]	gi|169779465|ref|XP_001824197.1|//hypothetical protein AOR_1_876094 [Aspergillus oryzae RIB40]
AO090005000588	1578	3814.15	23441.7	2.61965	0	Up	0	NA	GO:0003824//catalytic activity	GO:0006732//coenzyme metabolic process	Energy production and conversion ;	K01067//acetyl-CoA hydrolase [EC:3.1.2.1]	gi|169766324|ref|XP_001817633.1|//acetyl-CoA hydrolase [Aspergillus oryzae RIB40]
AO090003001107	5542	2931.9	18009.3	2.61883	0	Up	0	GO:0031224//intrinsic component of membrane;GO:0016021//integral component of membrane	GO:0004175//endopeptidase activity;GO:0004222//metalloendopeptidase activity;GO:0046914//transition metal ion binding	GO:0006508//proteolysis;GO:0019538//protein metabolic process;GO:0007229//integrin-mediated signaling pathway	NA	K03510//DNA polymerase iota [EC:2.7.7.7]	gi|317144555|ref|XP_001820203.2|//Disintegrin and metalloproteinase domain-containing protein B [Aspergillus oryzae RIB40];gi|83768062|dbj|BAE58201.1|//unnamed protein product [Aspergillus oryzae RIB40]
AO090038000410	594	1.73451	10.6295	2.61547	0.00333126	Up	0.00194117	NA	NA	NA	NA	NA	gi|169781740|ref|XP_001825333.1|//GNAT family acetyltransferase [Aspergillus oryzae RIB40]
AO090003000207	468	62.0098	379.55	2.61372	1.49624e-62	Up	2.31398e-63	NA	GO:0046914//transition metal ion binding	NA	NA	NA	gi|914759354|gb|KOC13201.1|//CHY zinc finger domain protein [Aspergillus flavus AF70]
AO090023000094	444	0.887578	5.42737	2.61231	0.0284929	Up	0.0184444	NA	NA	NA	NA	NA	gi|169772419|ref|XP_001820678.1|//hypothetical protein AOR_1_162144 [Aspergillus oryzae RIB40]
AO090010000444	2328	4826.5	29490.7	2.61121	0	Up	0	GO:0044424//intracellular part;GO:0043234//protein complex	GO:0008443//phosphofructokinase activity;GO:0043169//cation binding;GO:0032559//adenyl ribonucleotide binding	GO:0006007//glucose catabolic process;GO:0006796//phosphate-containing compound metabolic process	Carbohydrate transport and metabolism ;	K00850//6-phosphofructokinase 1 [EC:2.7.1.11]	gi|169785947|ref|XP_001827434.1|//6-phosphofructokinase [Aspergillus oryzae RIB40]
AO090023000501	525	121.529	742.466	2.61102	2.33448e-121	Up	2.38326e-122	NA	NA	NA	NA	NA	gi|169773149|ref|XP_001821043.1|//hypothetical protein AOR_1_862144 [Aspergillus oryzae RIB40]
AO090026000545	1459	1324.76	8080.3	2.60868	0	Up	0	GO:0043234//protein complex	GO:0019787//ubiquitin-like protein transferase activity	GO:0032446//protein modification by small protein conjugation	Posttranslational modification, protein turnover, chaperones ;	K09561//STIP1 homology and U-box containing protein 1 [EC:2.3.2.27]	gi|391868807|gb|EIT78016.1|//chaperone-dependent E3 ubiquitin protein ligase [Aspergillus oryzae 3.042];gi|83769841|dbj|BAE59976.1|//unnamed protein product [Aspergillus oryzae RIB40]
AO090103000428	909	1.3126	8.00251	2.60802	0.0117686	Up	0.00725965	GO:0044424//intracellular part	GO:0016616//oxidoreductase activity, acting on the CH-OH group of donors, NAD or NADP as acceptor	GO:0008152//metabolic process	Amino acid transport and metabolism ;	K09484//quinate dehydrogenase [EC:1.1.1.24]	gi|169785058|ref|XP_001826990.1|//shikimate / quinate 5-dehydrogenase, protein [Aspergillus oryzae RIB40]
AO090023000718	816	41.4435	252.661	2.60799	7.5414e-43	Up	1.46413e-43	NA	NA	NA	NA	NA	gi|169773525|ref|XP_001821231.1|//hypothetical protein AOR_1_1236144 [Aspergillus oryzae RIB40]
AO090023000362	2283	2.16079	13.1168	2.60178	0.0014815	Up	0.000838465	GO:0043231//intracellular membrane-bounded organelle	GO:0046914//transition metal ion binding;GO:0003676//nucleic acid binding	NA	NA	K02365//separase [EC:3.4.22.49]	gi|83768782|dbj|BAE58919.1|//unnamed protein product [Aspergillus oryzae RIB40]
AO090005001646	2449	2773.95	16831.2	2.60113	0	Up	0	GO:0009331//glycerol-3-phosphate dehydrogenase complex;GO:0043234//protein complex;GO:0016021//integral component of membrane	GO:0016901//oxidoreductase activity, acting on the CH-OH group of donors, quinone or similar compound as acceptor;GO:0004368//glycerol-3-phosphate dehydrogenase activity	GO:0006071//glycerol metabolic process;GO:0006072//glycerol-3-phosphate metabolic process;GO:0055114//oxidation-reduction process	Energy production and conversion ;	K00111//glycerol-3-phosphate dehydrogenase [EC:1.1.5.3]	gi|169768152|ref|XP_001818547.1|//glycerol-3-phosphate dehydrogenase [Aspergillus oryzae RIB40]
AO090012000416	957	134.396	814.129	2.59877	8.14273e-122	Up	8.27541e-123	GO:0043231//intracellular membrane-bounded organelle;GO:0031224//intrinsic component of membrane;GO:0019866//organelle inner membrane	NA	GO:0006810//transport	NA	K15108//solute carrier family 25 (mitochondrial thiamine pyrophosphate transporter), member 19	gi|169763072|ref|XP_001727436.1|//thiamine pyrophosphate carrier 1 [Aspergillus oryzae RIB40]
AO090003001533	2185	11.9141	72.0113	2.59556	2.27673e-13	Up	8.03761e-14	NA	NA	NA	NA	NA	gi|83768429|dbj|BAE58568.1|//unnamed protein product [Aspergillus oryzae RIB40];gi|914756341|gb|KOC10506.1|//hypothetical protein AFLA70_20g004751 [Aspergillus flavus AF70]
AO090001000199	1008	4.50221	27.2012	2.59497	6.32627e-06	Up	3.03414e-06	NA	GO:0003824//catalytic activity	GO:0008152//metabolic process	Replication, recombination and repair ;	NA	gi|169768554|ref|XP_001818747.1|//DNA repair family protein [Aspergillus oryzae RIB40]
AO090005000970	5256	1264.11	7626.64	2.59293	0	Up	0	NA	GO:0050662//coenzyme binding;GO:0016491//oxidoreductase activity	GO:0044281//small molecule metabolic process	Amino acid transport and metabolism ;	K00108//choline dehydrogenase [EC:1.1.99.1]	gi|169766992|ref|XP_001817967.1|//versicolorin B synthase [Aspergillus oryzae RIB40] ;gi|914754328|gb|KOC08493.1|//versicolorin B synthase [Aspergillus flavus AF70]
AO090011000715	1962	2745.82	16546.1	2.59118	0	Up	0	GO:0005576//extracellular region	GO:0030248//cellulose binding;GO:0004553//hydrolase activity, hydrolyzing O-glycosyl compounds;GO:0030247//polysaccharide binding;GO:0043167//ion binding;GO:0016798//hydrolase activity, acting on glycosyl bonds	GO:0009251//glucan catabolic process;GO:0044238//primary metabolic process	Carbohydrate transport and metabolism ;	K01179//endoglucanase [EC:3.2.1.4]	gi|849270826|dbj|GAO86886.1|//probable endo-beta-1,4-glucanase B [Neosartorya udagawae];gi|169783678|ref|XP_001826301.1|//endo-beta-1,4-glucanase A [Aspergillus oryzae RIB40]
AO090124000077	1263	934.767	5631.52	2.59085	0	Up	0	NA	GO:0046914//transition metal ion binding;GO:0003824//catalytic activity	GO:0008152//metabolic process	Energy production and conversion ; General function prediction only ;	K07512//mitochondrial trans-2-enoyl-CoA reductase [EC:1.3.1.38]	gi|83772496|dbj|BAE62625.1|//unnamed protein product [Aspergillus oryzae RIB40]
BGI_novel_G000016	1726	80.4747	484.768	2.59069	1.8386e-70	Up	2.67759e-71	NA	NA	NA	NA	K00859//dephospho-CoA kinase [EC:2.7.1.24]	gi|317143309|ref|XP_003189492.1|//hypothetical protein AOR_1_298154 [Aspergillus oryzae RIB40]
AO090003001474	558	21.2807	127.836	2.58668	1.99045e-21	Up	5.59223e-22	NA	NA	NA	Secondary metabolites biosynthesis, transport and catabolism ;	NA	gi|83768381|dbj|BAE58520.1|//unnamed protein product [Aspergillus oryzae RIB40]
AO090010000061	2551	739.24	4439.47	2.58628	0	Up	0	NA	NA	NA	NA	K03006//DNA-directed RNA polymerase II subunit RPB1 [EC:2.7.7.6]	gi|83775856|dbj|BAE65975.1|//unnamed protein product [Aspergillus oryzae RIB40]
AO090009000021	1160	2.88395	17.3194	2.58627	0.00126105	Up	0.000710104	NA	NA	NA	NA	K21293//cytochrome P450 family 619	gi|83764399|dbj|BAE54543.1|//unnamed protein product [Aspergillus oryzae RIB40]
AO090005000650	1256	654.15	3916.44	2.58185	0	Up	0	NA	GO:0005543//phospholipid binding;GO:0035091//phosphatidylinositol binding	GO:0009987//cellular process	NA	NA	gi|992082084|ref|XP_015404588.1|//PX domain protein, partial [Aspergillus nomius NRRL 13137];gi|83765545|dbj|BAE55688.1|//unnamed protein product [Aspergillus oryzae RIB40]
AO090009000009	1776	20.5178	122.667	2.5798	1.8592e-18	Up	5.66507e-19	NA	GO:0003824//catalytic activity;GO:0016491//oxidoreductase activity	GO:0055114//oxidation-reduction process	General function prediction only ;	K00010//myo-inositol 2-dehydrogenase / D-chiro-inositol 1-dehydrogenase [EC:1.1.1.18 1.1.1.369]	gi|83764388|dbj|BAE54532.1|//unnamed protein product [Aspergillus oryzae RIB40];gi|391872843|gb|EIT81927.1|//hypothetical protein Ao3042_01531 [Aspergillus oryzae 3.042]
AO090005000343	2798	33.584	200.553	2.57814	5.15985e-35	Up	1.12763e-35	GO:0043231//intracellular membrane-bounded organelle	GO:0046914//transition metal ion binding;GO:0001071//nucleic acid binding transcription factor activity;GO:0003676//nucleic acid binding	GO:0006351//transcription, DNA-templated	NA	NA	gi|83765274|dbj|BAE55417.1|//unnamed protein product [Aspergillus oryzae RIB40]
AO090012000660	1260	164.458	981.678	2.57753	5.07799e-156	Up	4.32865e-157	NA	GO:0004175//endopeptidase activity	GO:0019538//protein metabolic process;GO:0012501//programmed cell death	Function unknown ;	NA	gi|770309059|gb|KJK66276.1|//Caspase domain protein [Aspergillus parasiticus SU-1]
AO090023000259	2127	245.236	1460.72	2.57444	3.54721e-236	Up	2.28578e-237	NA	GO:0004871//signal transducer activity;GO:0004673//protein histidine kinase activity	GO:0044260//cellular macromolecule metabolic process;GO:0016310//phosphorylation;GO:0007165//signal transduction;GO:0044238//primary metabolic process	Signal transduction mechanisms ;	K19692//osomolarity two-component system, sensor histidine kinase TcsA [EC:2.7.13.3]	gi|169772727|ref|XP_001820832.1|//two-component system protein A [Aspergillus oryzae RIB40]
AO090010000059	4330	154.618	920.474	2.57367	9.497e-134	Up	9.06599e-135	NA	GO:0005524//ATP binding;GO:0016462//pyrophosphatase activity;GO:0032559//adenyl ribonucleotide binding	NA	Posttranslational modification, protein turnover, chaperones ;	K14575//AAA family ATPase;K13525//transitional endoplasmic reticulum ATPase;K14571//ribosome biogenesis ATPase	gi|83775855|dbj|BAE65974.1|//unnamed protein product [Aspergillus oryzae RIB40];gi|914764974|gb|KOC18783.1|//hypothetical protein AFLA70_4g008750 [Aspergillus flavus AF70]
AO090020000415	1944	2259.97	13432.7	2.57137	0	Up	0	NA	GO:0000104//succinate dehydrogenase activity;GO:0050662//coenzyme binding	GO:0009060//aerobic respiration	Energy production and conversion ;	K00234//succinate dehydrogenase (ubiquinone) flavoprotein subunit [EC:1.3.5.1]	gi|169780546|ref|XP_001824737.1|//succinate dehydrogenase [ubiquinone] flavoprotein subunit [Aspergillus oryzae RIB40]
AO090005001356	1134	18.9291	112.328	2.56905	0.0406257	Up	0.026721	NA	NA	NA	General function prediction only ;	K11294//nucleolin	gi|169767628|ref|XP_001818285.1|//transcriptional regulator [Aspergillus oryzae RIB40]
AO090011000125	3069	1.52133	9.02112	2.56797	0.00828158	Up	0.00501103	NA	NA	NA	NA	NA	gi|83774552|dbj|BAE64675.1|//unnamed protein product [Aspergillus oryzae RIB40]
AO090023000870	2379	617.738	3658.17	2.56606	0	Up	0	NA	GO:0016787//hydrolase activity	NA	Lipid transport and metabolism ;	K17361//acyl-coenzyme A thioesterase 9 [EC:3.1.2.-]	gi|317146216|ref|XP_001821370.2|//acyl-CoA thioester hydrolase [Aspergillus oryzae RIB40];gi|83769231|dbj|BAE59368.1|//unnamed protein product [Aspergillus oryzae RIB40]
AO090003001547	1541	261.705	1547.72	2.56413	3.14301e-218	Up	2.1613e-219	NA	NA	NA	General function prediction only ;	K20032//palmitoyltransferase ZDHHC13/17 [EC:2.3.1.225];K06867//uncharacterized protein;K06694//26S proteasome non-ATPase regulatory subunit 10	gi|83768442|dbj|BAE58581.1|//unnamed protein product [Aspergillus oryzae RIB40];gi|317145053|ref|XP_001820583.2|//Ankyrin domain protein [Aspergillus oryzae RIB40]
AO090003000465	1527	168.031	990.358	2.55922	1.65166e-145	Up	1.48243e-146	NA	NA	NA	NA	NA	gi|169770349|ref|XP_001819644.1|//arrestin (or S-antigen), N-terminal domain protein [Aspergillus oryzae RIB40]
AO090012000551	1164	111.599	656.963	2.55749	8.37812e-20	Up	2.45181e-20	NA	GO:0003933//GTP cyclohydrolase activity	GO:0006771//riboflavin metabolic process	Coenzyme transport and metabolism ;	K01497//GTP cyclohydrolase II [EC:3.5.4.25]	gi|83770579|dbj|BAE60712.1|//unnamed protein product [Aspergillus oryzae RIB40]
AO090005001312	1560	418.934	2463.29	2.55579	0	Up	0	NA	NA	NA	Energy production and conversion ;	K18703//succinate---hydroxymethylglutarate CoA-transferase [EC:2.8.3.13]	gi|83766101|dbj|BAE56244.1|//unnamed protein product [Aspergillus oryzae RIB40]
AO090001000294	2556	293.294	1720.82	2.55268	2.54209e-271	Up	1.42748e-272	GO:0005576//extracellular region	NA	NA	Function unknown ;	K20628//expansin;K19851//flocculation protein FLO11;K15071//recyclin-1;K01183//chitinase [EC:3.2.1.14]	gi|317141808|ref|XP_001818833.2|//SCP-like extracellular protein [Aspergillus oryzae RIB40] ;gi|83766691|dbj|BAE56831.1|//unnamed protein product [Aspergillus oryzae RIB40]
AO090701000827	567	175.22	1028.03	2.55265	1.57289e-138	Up	1.45662e-139	NA	GO:0016491//oxidoreductase activity	GO:0008152//metabolic process	Coenzyme transport and metabolism ; Energy production and conversion ;	K00480//salicylate hydroxylase [EC:1.14.13.1]	gi|83772351|dbj|BAE62481.1|//unnamed protein product [Aspergillus oryzae RIB40]
AO090005000062	1509	2.39834	14.0579	2.55127	0.00234848	Up	0.00135119	NA	GO:0016491//oxidoreductase activity	GO:0008152//metabolic process	Coenzyme transport and metabolism ; Energy production and conversion ;	K03380//phenol 2-monooxygenase [EC:1.14.13.7]	gi|169765424|ref|XP_001817183.1|//monooxygenase [Aspergillus oryzae RIB40]
AO090012000272	1086	296.424	1733.98	2.54836	4.26311e-223	Up	2.88838e-224	NA	NA	NA	NA	K07893//Ras-related protein Rab-6A	gi|83770343|dbj|BAE60476.1|//unnamed protein product [Aspergillus oryzae RIB40]
AO090010000624	1008	0.924165	5.40579	2.54828	0.0450765	Up	0.0298808	NA	NA	NA	NA	K00108//choline dehydrogenase [EC:1.1.99.1];K06123//1-acylglycerone phosphate reductase [EC:1.1.1.101];K14950//cation-transporting ATPase 13A1 [EC:3.6.3.-];K01613//phosphatidylserine decarboxylase [EC:4.1.1.65];K07555//ATP synthase mitochondrial F1 complex assembly factor 1	gi|83776335|dbj|BAE66454.1|//unnamed protein product [Aspergillus oryzae RIB40]
AO090038000574	681	130.823	764.935	2.54772	5.166e-110	Up	5.60684e-111	NA	NA	NA	NA	NA	gi|238498876|ref|XP_002380673.1|//conserved hypothetical protein [Aspergillus flavus NRRL3357]
AO090009000308	1569	51.2235	299.241	2.54643	2.74849e-51	Up	4.77691e-52	NA	GO:0032559//adenyl ribonucleotide binding;GO:0016881//acid-amino acid ligase activity	GO:0006760//folic acid-containing compound metabolic process	Coenzyme transport and metabolism ;	K01930//folylpolyglutamate synthase [EC:6.3.2.17]	gi|391863473|gb|EIT72783.1|//folylpolyglutamate synthase [Aspergillus oryzae 3.042]
AO090011000931	1020	304.66	1778.88	2.5457	1.61532e-37	Up	3.39481e-38	GO:0044424//intracellular part	GO:0016836//hydro-lyase activity;GO:0048037//cofactor binding	GO:0019344//cysteine biosynthetic process;GO:0006563//L-serine metabolic process	Amino acid transport and metabolism ;	K01697//cystathionine beta-synthase [EC:4.2.1.22]	gi|391868176|gb|EIT77395.1|//cysteine synthase [Aspergillus oryzae 3.042]
AO090120000113	474	68.6344	400.745	2.54568	5.42297e-65	Up	8.24702e-66	NA	NA	NA	Function unknown ;	K09958//uncharacterized protein	gi|635503145|gb|KDE75287.1|//uncharacterized protein AO1008_11590 [Aspergillus oryzae 100-8]
AO090023000035	1264	60.503	353.079	2.54491	3.78868e-47	Up	6.90912e-48	NA	NA	NA	NA	K16055//trehalose 6-phosphate synthase/phosphatase [EC:2.4.1.15 3.1.3.12]	gi|83768486|dbj|BAE58623.1|//unnamed protein product [Aspergillus oryzae RIB40];gi|317145252|ref|XP_001820625.2|//hypothetical protein AOR_1_62144 [Aspergillus oryzae RIB40]
AO090038000033	636	2.17211	12.6717	2.54444	0.00213378	Up	0.00122256	NA	NA	NA	NA	NA	gi|83773765|dbj|BAE63890.1|//unnamed protein product [Aspergillus oryzae RIB40]
BGI_novel_G000042	2016	351.029	2046.91	2.54378	1.86875e-284	Up	1.02357e-285	GO:0005779//integral component of peroxisomal membrane	GO:0000295//adenine nucleotide transmembrane transporter activity	GO:0007031//peroxisome organization;GO:0006635//fatty acid beta-oxidation;GO:0055085//transmembrane transport;GO:0015867//ATP transport	NA	K13354//solute carrier family 25 (peroxisomal adenine nucleotide transporter), member 17	gi|317139821|ref|XP_003189204.1|//peroxisomal carrier protein [Aspergillus oryzae RIB40]
AO090103000259	1953	3.04148	17.7245	2.5429	0.00050663	Up	0.000276704	NA	NA	NA	General function prediction only ;	K12828//splicing factor 3B subunit 1	gi|391864442|gb|EIT73738.1|//ankyrin [Aspergillus oryzae 3.042]
AO090012000890	1791	119.066	693.198	2.5415	5.48606e-98	Up	6.46428e-99	NA	GO:0016836//hydro-lyase activity	GO:0008652//cellular amino acid biosynthetic process;GO:0006549//isoleucine metabolic process;GO:0006573//valine metabolic process	Amino acid transport and metabolism ; Carbohydrate transport and metabolism ;	K01687//dihydroxy-acid dehydratase [EC:4.2.1.9]	gi|391870225|gb|EIT79411.1|//dihydroxy-acid dehydratase [Aspergillus oryzae 3.042]
AO090701000525	2290	17.658	102.584	2.53842	4.08565e-18	Up	1.2562e-18	NA	GO:0016614//oxidoreductase activity, acting on CH-OH group of donors;GO:0050660//flavin adenine dinucleotide binding;GO:0003824//catalytic activity;GO:0050662//coenzyme binding	GO:0008152//metabolic process;GO:0055114//oxidation-reduction process	Energy production and conversion ;	K15454//tRNA pseudouridine synthase 9 [EC:5.4.99.-];K04487//cysteine desulfurase [EC:2.8.1.7]	gi|238495006|ref|XP_002378739.1|//oxidoreductase, FAD-binding, putative [Aspergillus flavus NRRL3357];gi|83772094|dbj|BAE62224.1|//unnamed protein product [Aspergillus oryzae RIB40]
AO090011000773	1824	1065.29	6187.89	2.5382	0	Up	0	NA	NA	NA	NA	NA	gi|169783780|ref|XP_001826352.1|//hypothetical protein AOR_1_1296054 [Aspergillus oryzae RIB40]
AO090023000367	1164	1.29391	7.51406	2.53786	0.0123982	Up	0.00767313	NA	GO:0004553//hydrolase activity, hydrolyzing O-glycosyl compounds;GO:0043167//ion binding	GO:0006026//aminoglycan catabolic process	Carbohydrate transport and metabolism ;	K01183//chitinase [EC:3.2.1.14]	gi|83768787|dbj|BAE58924.1|//unnamed protein product [Aspergillus oryzae RIB40]
AO090003001456	801	3.43414	19.8902	2.53404	0.000124145	Up	6.47865e-05	NA	NA	NA	NA	NA	gi|83768367|dbj|BAE58506.1|//unnamed protein product [Aspergillus oryzae RIB40]
AO090012000821	864	7512.49	43293.9	2.5268	0	Up	0	NA	NA	NA	NA	NA	gi|83770803|dbj|BAE60936.1|//unnamed protein product [Aspergillus oryzae RIB40]
AO090701000552	1641	109.865	631.464	2.52297	1.58082e-97	Up	1.86998e-98	NA	NA	NA	Carbohydrate transport and metabolism ; Amino acid transport and metabolism ; Inorganic ion transport and metabolism ; General function prediction only ;	K08165//MFS transporter, DHA2 family, multidrug resistance protein;K10866//DNA repair protein RAD50 [EC:3.6.-.-];K14708//solute carrier family 26 (sodium-independent sulfate anion transporter), member 11	gi|169777835|ref|XP_001823383.1|//MFS multidrug transporter [Aspergillus oryzae RIB40]
AO090124000015	1269	202.982	1166.1	2.52227	1.81621e-174	Up	1.46293e-175	NA	NA	GO:0006629//lipid metabolic process	NA	K01046//triacylglycerol lipase [EC:3.1.1.3]	gi|169778470|ref|XP_001823700.1|//lipase 1 precursor [Aspergillus oryzae RIB40]
AO090206000085	1415	45.4556	260.91	2.52102	6.44088e-38	Up	1.34415e-38	GO:0016021//integral component of membrane	NA	NA	NA	K18587//ubiquinone biosynthesis protein COQ9;K06123//1-acylglycerone phosphate reductase [EC:1.1.1.101];K14950//cation-transporting ATPase 13A1 [EC:3.6.3.-]	gi|83775329|dbj|BAE65451.1|//unnamed protein product [Aspergillus oryzae RIB40];gi|317157781|ref|XP_001826584.2|//hypothetical protein AOR_1_148044 [Aspergillus oryzae RIB40]
AO090012000098	1428	8.25284	47.2902	2.51858	0.0198593	Up	0.0125906	GO:0031224//intrinsic component of membrane	NA	NA	NA	K00606//3-methyl-2-oxobutanoate hydroxymethyltransferase [EC:2.1.2.11]	gi|83770192|dbj|BAE60325.1|//unnamed protein product [Aspergillus oryzae RIB40]
AO090701000510	762	337.497	1932.44	2.51747	1.98047e-297	Up	1.05924e-298	NA	NA	NA	NA	NA	gi|169777759|ref|XP_001823345.1|//glucuronan lyase A [Aspergillus oryzae RIB40]
AO090011000575	8959	1121.61	6409.44	2.51463	0	Up	0	GO:0000124//SAGA complex;GO:0000781//chromosome, telomeric region;GO:0005671//Ada2/Gcn5/Ada3 transcription activator complex;GO:0046695//SLIK (SAGA-like) complex	GO:0003677//DNA binding;GO:0003713//transcription coactivator activity;GO:0003682//chromatin binding;GO:0004402//histone acetyltransferase activity;GO:0008270//zinc ion binding;GO:0003824//catalytic activity;GO:0001786//phosphatidylserine binding	GO:0071470//cellular response to osmotic stress;GO:0006357//regulation of transcription from RNA polymerase II promoter;GO:0035066//positive regulation of histone acetylation;GO:0000183//chromatin silencing at rDNA;GO:0006348//chromatin silencing at telomere;GO:0010520//regulation of reciprocal meiotic recombination	Lipid transport and metabolism ;	K11314//transcriptional adapter 2-alpha;K07511//enoyl-CoA hydratase [EC:4.2.1.17]	gi|317157044|ref|XP_003190797.1|//SAGA complex subunit (Ada2) [Aspergillus oryzae RIB40];gi|391864933|gb|EIT74225.1|//enoyl-CoA hydratase/carnithine racemase [Aspergillus oryzae 3.042]
AO090020000182	507	1.95905	11.1776	2.51238	0.00407959	Up	0.00239713	NA	GO:0046914//transition metal ion binding	NA	Posttranslational modification, protein turnover, chaperones ;	K15692//E3 ubiquitin-protein ligase RNF13 [EC:2.3.2.27];K19041//E3 ubiquitin-protein ligase RNF38/44 [EC:2.3.2.27];K15706//E3 ubiquitin-protein ligase RNF167 [EC:2.3.2.27];K15698//RING finger protein 121;K17970//mitochondrial division protein 1	gi|238505787|ref|XP_002384099.1|//RING finger protein [Aspergillus flavus NRRL3357]
AO090010000678	1560	1.94668	11.1032	2.51189	0.00444995	Up	0.00262458	NA	NA	NA	Secondary metabolites biosynthesis, transport and catabolism ;	K07824//benzoate 4-monooxygenase [EC:1.14.13.12]	gi|293329901|dbj|BAJ04460.1|//cytochrome P450 monooxygenase [Aspergillus oryzae]
AO090011000483	1665	107.766	613.796	2.50985	1.05071e-69	Up	1.54081e-70	GO:0031224//intrinsic component of membrane	GO:0022857//transmembrane transporter activity	GO:0006810//transport	Carbohydrate transport and metabolism ; Amino acid transport and metabolism ; Inorganic ion transport and metabolism ; General function prediction only ;	K15196//transcription factor IIIB 90 kDa subunit;K08139//MFS transporter, SP family, sugar:H+ symporter;K00382//dihydrolipoamide dehydrogenase [EC:1.8.1.4]	gi|169783302|ref|XP_001826113.1|//MFS monosaccharide transporter [Aspergillus oryzae RIB40]
AO090010000749	1569	13.8401	78.7182	2.50785	3.22337e-14	Up	1.10354e-14	GO:0016021//integral component of membrane	GO:0016787//hydrolase activity;GO:0003824//catalytic activity	GO:0008152//metabolic process	Lipid transport and metabolism ;	K00854//xylulokinase [EC:2.7.1.17];K01956//carbamoyl-phosphate synthase small subunit [EC:6.3.5.5];K14778//ATP-dependent RNA helicase DDX49/DBP8 [EC:3.6.4.13]	gi|83776447|dbj|BAE66566.1|//unnamed protein product [Aspergillus oryzae RIB40];gi|317159310|ref|XP_001827699.2|//lipase/thioesterase family protein [Aspergillus oryzae RIB40]
AO090701000057	2478	334.708	1895.7	2.50176	1.56684e-288	Up	8.48113e-290	GO:0043231//intracellular membrane-bounded organelle;GO:0043234//protein complex	GO:0016830//carbon-carbon lyase activity	GO:0009064//glutamine family amino acid metabolic process;GO:0006355//regulation of transcription, DNA-templated	Amino acid transport and metabolism ; Coenzyme transport and metabolism ;	K13950//para-aminobenzoate synthetase [EC:2.6.1.85]	gi|169776969|ref|XP_001822950.1|//para aminobenzoic acid synthetase [Aspergillus oryzae RIB40]
AO090009000114	1336	32.1301	180.653	2.49123	1.96978e-29	Up	4.71637e-30	GO:0044464//cell part	GO:0003824//catalytic activity;GO:0004871//signal transducer activity;GO:0005488//binding	GO:0008152//metabolic process	NA	NA	gi|768703813|gb|KJJ30737.1|//low density lipoprotein [Aspergillus flavus AF70];gi|83764477|dbj|BAE54621.1|//unnamed protein product [Aspergillus oryzae RIB40]
AO090005000412	1044	1203.56	6762.31	2.49021	0	Up	0	NA	GO:0050662//coenzyme binding	NA	Energy production and conversion ;	K03522//electron transfer flavoprotein alpha subunit	gi|169766020|ref|XP_001817481.1|//electron transfer flavoprotein subunit alpha [Aspergillus oryzae RIB40]
AO090005000803	947	12408.5	69407.8	2.48376	0	Up	0	NA	NA	NA	Posttranslational modification, protein turnover, chaperones ;	K11245//mating pheromone-induced death protein 2	gi|169766700|ref|XP_001817821.1|//hypothetical protein AOR_1_1404174 [Aspergillus oryzae RIB40];gi|615409391|ref|XP_007582963.1|//hypothetical protein UCRNP2_3669 [Neofusicoccum parvum UCRNP2]
AO090102000478	4860	336.017	1878.54	2.48301	1.07349e-258	Up	6.30477e-260	GO:0016021//integral component of membrane	GO:0003824//catalytic activity;GO:0022891//substrate-specific transmembrane transporter activity	GO:0008643//carbohydrate transport;GO:0055085//transmembrane transport	Posttranslational modification, protein turnover, chaperones ;	K00799//glutathione S-transferase [EC:2.5.1.18]	gi|83771380|dbj|BAE61512.1|//unnamed protein product [Aspergillus oryzae RIB40];gi|317148251|ref|XP_001822646.2|//MFS sugar transporter [Aspergillus oryzae RIB40]
AO090701000675	1224	20.2644	112.712	2.47563	1.59363e-15	Up	5.25781e-16	NA	GO:0016769//transferase activity, transferring nitrogenous groups;GO:0016846//carbon-sulfur lyase activity;GO:0048037//cofactor binding	GO:0008652//cellular amino acid biosynthetic process	Amino acid transport and metabolism ;	K00815//tyrosine aminotransferase [EC:2.6.1.5];K14264//kynurenine aminotransferase [EC:2.6.1.7]	gi|169778035|ref|XP_001823483.1|//aminotransferase [Aspergillus oryzae RIB40]
AO090010000638	918	5.34801	29.7431	2.47548	1.06953e-05	Up	5.20833e-06	NA	NA	NA	NA	NA	gi|169786279|ref|XP_001827600.1|//hypothetical protein AOR_1_1064024 [Aspergillus oryzae RIB40]
AO090020000195	1467	759.705	4224.94	2.47542	0	Up	0	NA	GO:0016741//transferase activity, transferring one-carbon groups;GO:0008168//methyltransferase activity	GO:0006730//one-carbon metabolic process;GO:0032259//methylation	NA	K01216//licheninase [EC:3.2.1.73];K06897//7,8-dihydropterin-6-yl-methyl-4-(beta-D-ribofuranosyl)aminobenzene 5'-phosphate synthase [EC:2.5.1.105];K12584//m7GpppX diphosphatase [EC:3.6.1.59];K20181//vacuolar protein sorting-associated protein 18;K01183//chitinase [EC:3.2.1.14]	gi|83773289|dbj|BAE63416.1|//unnamed protein product [Aspergillus oryzae RIB40];gi|317151277|ref|XP_001824549.2|//SAM dependent methyltransferase [Aspergillus oryzae RIB40]
AO090005000805	1128	94.9654	527.978	2.475	5.25183e-72	Up	7.53232e-73	NA	NA	NA	NA	NA	gi|169766704|ref|XP_001817823.1|//hypothetical protein AOR_1_1408174 [Aspergillus oryzae RIB40]
AO090003000613	1680	14.4498	80.2706	2.47383	1.21042e-13	Up	4.23866e-14	NA	NA	NA	NA	NA	gi|83767636|dbj|BAE57775.1|//unnamed protein product [Aspergillus oryzae RIB40]
AO090009000054	519	1.72492	9.57609	2.47291	0.00649157	Up	0.0038861	NA	GO:0005506//iron ion binding;GO:0003824//catalytic activity	GO:0008152//metabolic process	Function unknown ;	NA	gi|83764429|dbj|BAE54573.1|//unnamed protein product [Aspergillus oryzae RIB40]
AO090026000375	1509	0.883081	4.89205	2.46982	0.0465163	Up	0.0308952	NA	NA	NA	NA	K03549//KUP system potassium uptake protein;K09252//feruloyl esterase [EC:3.1.1.73];K10759//tannase [EC:3.1.1.20]	gi|169774745|ref|XP_001821840.1|//feruloyl esterase B precursor [Aspergillus oryzae RIB40]
AO090005000298	1536	1.54066	8.51565	2.46657	0.0135478	Up	0.00842201	NA	GO:0003824//catalytic activity;GO:0050662//coenzyme binding	NA	Energy production and conversion ;	K15454//tRNA pseudouridine synthase 9 [EC:5.4.99.-];K00102//D-lactate dehydrogenase (cytochrome) [EC:1.1.2.4];K01501//nitrilase [EC:3.5.5.1];K04487//cysteine desulfurase [EC:2.8.1.7]	gi|83765234|dbj|BAE55377.1|//unnamed protein product [Aspergillus oryzae RIB40]
AO090012000433	1588	14.0625	77.7038	2.46614	5.78002e-12	Up	2.14536e-12	NA	NA	NA	NA	NA	gi|83770478|dbj|BAE60611.1|//unnamed protein product [Aspergillus oryzae RIB40];gi|317137018|ref|XP_001727450.2|//hypothetical protein AOR_1_746194 [Aspergillus oryzae RIB40]
AO090701000738	699	336.659	1856.71	2.46339	4.59248e-234	Up	2.98471e-235	NA	NA	NA	NA	K08343//ubiquitin-like-conjugating enzyme ATG3	gi|169778145|ref|XP_001823538.1|//hypothetical protein AOR_1_1298114 [Aspergillus oryzae RIB40]
AO090113000067	1461	8.09318	44.6346	2.46339	3.44691e-08	Up	1.48087e-08	NA	NA	NA	NA	NA	gi|770312096|gb|KJK68664.1|//hypothetical protein P875_00075795 [Aspergillus parasiticus SU-1];gi|83773000|dbj|BAE63128.1|//unnamed protein product [Aspergillus oryzae RIB40]
AO090011000920	2129	271.762	1496.37	2.46105	5.9143e-214	Up	4.12689e-215	NA	GO:0016824//hydrolase activity, acting on acid halide bonds;GO:0016740//transferase activity;GO:0016791//phosphatase activity	NA	Posttranslational modification, protein turnover, chaperones ;	K01560//2-haloacid dehalogenase [EC:3.8.1.2];K07393//putative glutathione S-transferase	gi|992078670|ref|XP_015402876.1|//glutathione S-transferase [Aspergillus nomius NRRL 13137];gi|83775225|dbj|BAE65348.1|//unnamed protein product [Aspergillus oryzae RIB40]
AO090011000521	1140	253.069	1391.02	2.45854	8.27663e-213	Up	5.81337e-214	NA	NA	NA	NA	NA	gi|83774889|dbj|BAE65012.1|//unnamed protein product [Aspergillus oryzae RIB40]
AO090010000449	1356	119.6	657.332	2.4584	1.59296e-101	Up	1.83301e-102	NA	GO:0016491//oxidoreductase activity	GO:0008152//metabolic process	Coenzyme transport and metabolism ; Energy production and conversion ;	K00480//salicylate hydroxylase [EC:1.14.13.1]	gi|169785955|ref|XP_001827438.1|//salicylate hydroxylase [Aspergillus oryzae RIB40]
BGI_novel_G000031	3331	271.092	1489.48	2.45795	1.23667e-210	Up	8.73173e-212	NA	NA	NA	NA	NA	gi|992084190|ref|XP_015405631.1|//F-box domain protein, partial [Aspergillus nomius NRRL 13137]
AO090011000892	3246	1696.65	9315.41	2.45693	0	Up	0	NA	NA	NA	NA	K13171//serine/arginine repetitive matrix protein 1	gi|83775203|dbj|BAE65326.1|//unnamed protein product [Aspergillus oryzae RIB40];gi|317157421|ref|XP_001826459.2|//hypothetical protein AOR_1_1508054 [Aspergillus oryzae RIB40]
AO090701000828	1146	555.37	3047.7	2.4562	0	Up	0	GO:0016021//integral component of membrane	GO:0016491//oxidoreductase activity;GO:0071949//FAD binding	GO:0008152//metabolic process;GO:0055114//oxidation-reduction process	Coenzyme transport and metabolism ; Energy production and conversion ;	K00480//salicylate hydroxylase [EC:1.14.13.1]	gi|83772352|dbj|BAE62482.1|//unnamed protein product [Aspergillus oryzae RIB40]
AO090701000749	771	632.115	3451.99	2.44917	0	Up	0	NA	GO:0003824//catalytic activity	NA	General function prediction only ;	NA	gi|169778161|ref|XP_001823546.1|//HAD superfamily hydrolase [Aspergillus oryzae RIB40]
AO090026000356	1614	304.396	1661.95	2.44885	5.75898e-243	Up	3.59969e-244	NA	GO:0003824//catalytic activity	GO:0008152//metabolic process	Amino acid transport and metabolism ; General function prediction only ;	K18914//adrenodoxin-NADP+ reductase [EC:1.18.1.6]	gi|169774713|ref|XP_001821824.1|//NADPH-adrenodoxin reductase Arh1 [Aspergillus oryzae RIB40]
AO090023000054	1650	13.1796	71.5756	2.44116	1.44934e-12	Up	5.26876e-13	GO:0031224//intrinsic component of membrane	GO:0022857//transmembrane transporter activity	GO:0006810//transport	Carbohydrate transport and metabolism ; Amino acid transport and metabolism ; Inorganic ion transport and metabolism ; General function prediction only ;	K08139//MFS transporter, SP family, sugar:H+ symporter	gi|169772349|ref|XP_001820643.1|//sugar transporter [Aspergillus oryzae RIB40]
AO090003001182	1383	10318.5	55959.5	2.43915	0	Up	0	GO:0005634//nucleus;GO:1990429//peroxisomal importomer complex;GO:0005886//plasma membrane;GO:0005737//cytoplasm	GO:0031386//protein tag;GO:0043008//ATP-dependent protein binding	GO:0000902//cell morphogenesis;GO:0030437//ascospore formation;GO:0036166//phenotypic switching;GO:0006513//protein monoubiquitination;GO:0034605//cellular response to heat;GO:0044182//filamentous growth of a population of unicellular organisms;GO:0016579//protein deubiquitination;GO:0009405//pathogenesis;GO:0000209//protein polyubiquitination	Posttranslational modification, protein turnover, chaperones ;	K08770//ubiquitin C	gi|156841217|ref|XP_001643983.1|//hypothetical protein Kpol_1070p6 [Vanderwaltozyma polyspora DSM 70294];gi|936405025|gb|KPM34337.1|//Polyubiquitin [Neonectria ditissima]
AO090103000030	2250	521.955	2829.97	2.43879	0	Up	0	GO:0016021//integral component of membrane	GO:0005215//transporter activity	GO:0006810//transport;GO:0055085//transmembrane transport;GO:0042221//response to chemical	Carbohydrate transport and metabolism ; Amino acid transport and metabolism ; Inorganic ion transport and metabolism ; General function prediction only ;	NA	gi|391864308|gb|EIT73604.1|//permease of the major facilitator superfamily [Aspergillus oryzae 3.042] ;gi|83775395|dbj|BAE65515.1|//unnamed protein product [Aspergillus oryzae RIB40]
AO090102000044	1522	161.199	873.57	2.43808	4.41874e-135	Up	4.18973e-136	NA	NA	NA	NA	NA	gi|317147798|ref|XP_001822290.2|//cell surface protein Mas1 [Aspergillus oryzae RIB40];gi|83771025|dbj|BAE61157.1|//unnamed protein product [Aspergillus oryzae RIB40]
AO090023000578	2016	50.7151	274.145	2.43446	6.88978e-38	Up	1.4391e-38	NA	NA	NA	NA	K09246//arginine metabolism regulation protein II	gi|83768973|dbj|BAE59110.1|//unnamed protein product [Aspergillus oryzae RIB40]
AO090166000092	8418	687.73	3715.87	2.43379	0	Up	0	GO:0043231//intracellular membrane-bounded organelle;GO:0005634//nucleus;GO:0016021//integral component of membrane	GO:0003677//DNA binding;GO:0000981//RNA polymerase II transcription factor activity, sequence-specific DNA binding;GO:0046914//transition metal ion binding;GO:0008270//zinc ion binding;GO:0001071//nucleic acid binding transcription factor activity;GO:0003676//nucleic acid binding	GO:0006357//regulation of transcription from RNA polymerase II promoter;GO:0006351//transcription, DNA-templated	Function unknown ;	K01684//galactonate dehydratase [EC:4.2.1.6];K09241//transcriptional regulatory protein GAL4;K03448//MFS transporter, ACS family, pantothenate transporter	gi|83771609|dbj|BAE61740.1|//unnamed protein product [Aspergillus oryzae RIB40];gi|914760860|gb|KOC14675.1|//hypothetical protein AFLA70_74g003471 [Aspergillus flavus AF70]
AO090003000710	432	741.079	3995.05	2.43051	0	Up	0	NA	NA	NA	NA	K05607//methylglutaconyl-CoA hydratase [EC:4.2.1.18]	gi|169770775|ref|XP_001819857.1|//LEA domain protein [Aspergillus oryzae RIB40]
AO090038000603	699	4.07098	21.9307	2.4295	0.000111817	Up	5.81165e-05	NA	NA	NA	NA	NA	gi|238498928|ref|XP_002380699.1|//conserved hypothetical protein [Aspergillus flavus NRRL3357]
AO090206000131	3564	14.2655	76.5363	2.42361	1.48886e-12	Up	5.41516e-13	NA	GO:0034061//DNA polymerase activity;GO:0016891//endoribonuclease activity, producing 5'-phosphomonoesters;GO:0003676//nucleic acid binding	GO:0006260//DNA replication	NA	K07374//tubulin alpha;K00869//mevalonate kinase [EC:2.7.1.36]	gi|83775366|dbj|BAE65488.1|//unnamed protein product [Aspergillus oryzae RIB40]
AO090166000117	1671	26.7481	143.191	2.42044	1.85192e-22	Up	5.0871e-23	NA	GO:0016879//ligase activity, forming carbon-nitrogen bonds;GO:0016810//hydrolase activity, acting on carbon-nitrogen (but not peptide) bonds	NA	Translation, ribosomal structure and biogenesis ;	K01426//amidase [EC:3.5.1.4]	gi|169776850|ref|XP_001822891.1|//general amidase-B [Aspergillus oryzae RIB40]
AO090005000641	2741	1026.11	5480.87	2.41722	0	Up	0	NA	GO:0003877//ATP adenylyltransferase activity;GO:0003676//nucleic acid binding	NA	General function prediction only ;	K09238//metallothionein expression activator;K09202//regulatory protein SWI5	gi|317139678|ref|XP_001817682.2|//C2H2 finger domain protein [Aspergillus oryzae RIB40]
AO090012000887	774	98.0544	523.712	2.41712	1.70665e-72	Up	2.43359e-73	NA	GO:0000166//nucleotide binding	NA	Transcription ;	K07734//transcriptional regulator	gi|169763862|ref|XP_001727831.1|//hypothetical protein AOR_1_1562194 [Aspergillus oryzae RIB40]
AO090010000386	1440	18.9402	100.677	2.41021	3.32049e-15	Up	1.10653e-15	NA	NA	NA	NA	NA	gi|169785861|ref|XP_001827391.1|//hypothetical protein AOR_1_640024 [Aspergillus oryzae RIB40]
AO090673000007	3774	336.427	1787.25	2.40937	4.56977e-258	Up	2.69231e-259	NA	GO:0042578//phosphoric ester hydrolase activity	GO:0046856//phosphatidylinositol dephosphorylation	Signal transduction mechanisms ;	K20279//synaptojanin [EC:3.1.3.36]	gi|391872854|gb|EIT81937.1|//inositol-1,4,5-triphosphate 5-phosphatase (synaptojanin), INP51/INP52/INP53 family [Aspergillus oryzae 3.042]
AO090005001593	1128	35.7393	189.38	2.4057	3.87869e-30	Up	9.20132e-31	NA	NA	NA	NA	NA	gi|169768058|ref|XP_001818500.1|//hypothetical protein AOR_1_2786174 [Aspergillus oryzae RIB40]
AO090011000820	1986	527.686	2795.88	2.40555	0	Up	0	GO:0031224//intrinsic component of membrane;GO:0000328//fungal-type vacuole lumen;GO:0016021//integral component of membrane;GO:0005886//plasma membrane	GO:0005313//L-glutamate transmembrane transporter activity;GO:0015183//L-aspartate transmembrane transporter activity;GO:0005275//amine transmembrane transporter activity	GO:0006865//amino acid transport;GO:0070778//L-aspartate transport;GO:0015813//L-glutamate transport;GO:0003333//amino acid transmembrane transport	Amino acid transport and metabolism ;	K16261//yeast amino acid transporter	gi|966762614|dbj|GAQ45015.1|//amino acid permease [Aspergillus niger];gi|121698393|ref|XP_001267807.1|//amino acid permease (Dip5), putative [Aspergillus clavatus NRRL 1];gi|169783866|ref|XP_001826395.1|//dicarboxylic amino acid permease [Aspergillus oryzae RIB40]
AO090005000649	5082	587.957	3112.19	2.40415	0	Up	0	GO:0031224//intrinsic component of membrane;GO:0016021//integral component of membrane	GO:0016780//phosphotransferase activity, for other substituted phosphate groups;GO:0005275//amine transmembrane transporter activity;GO:0015171//amino acid transmembrane transporter activity	GO:0008654//phospholipid biosynthetic process;GO:0006865//amino acid transport;GO:0003333//amino acid transmembrane transport	Amino acid transport and metabolism ;	K19564//choline transport protein;K00993//ethanolaminephosphotransferase [EC:2.7.8.1]	gi|770303990|gb|KJK62040.1|//Amino acid permease [Aspergillus parasiticus SU-1];gi|391864834|gb|EIT74128.1|//amino acid transporter [Aspergillus oryzae 3.042]
AO090012000933	1503	2.37934	12.5848	2.40305	0.00489838	Up	0.00290169	NA	NA	NA	Carbohydrate transport and metabolism ; Amino acid transport and metabolism ; Inorganic ion transport and metabolism ; General function prediction only ;	K10256//omega-6 fatty acid desaturase / acyl-lipid omega-6 desaturase (Delta-12 desaturase) [EC:1.14.19.6 1.14.19.22];K11230//mitogen-activated protein kinase kinase kinase [EC:2.7.11.25];K08157//MFS transporter, DHA1 family, multidrug resistance protein;K12604//CCR4-NOT transcription complex subunit 1	gi|169763946|ref|XP_001727873.1|//MFS transporter [Aspergillus oryzae RIB40]
AO090124000010	1128	9.81579	51.8372	2.40081	4.15916e-09	Up	1.7191e-09	GO:0043232//intracellular non-membrane-bounded organelle	GO:0032559//adenyl ribonucleotide binding	NA	Cytoskeleton ;	K05692//actin beta/gamma 1	gi|169778460|ref|XP_001823695.1|//actin [Aspergillus oryzae RIB40]
AO090010000563	813	64.0764	337.956	2.39897	1.686e-43	Up	3.25311e-44	GO:0044424//intracellular part	GO:0032559//adenyl ribonucleotide binding;GO:0004812//aminoacyl-tRNA ligase activity	GO:0006418//tRNA aminoacylation for protein translation	Translation, ribosomal structure and biogenesis ;	K07050//misacylated tRNA(Ala) deacylase [EC:3.1.1.-];K01130//arylsulfatase [EC:3.1.6.1]	gi|169786155|ref|XP_001827538.1|//alanyl-tRNA synthetase [Aspergillus oryzae RIB40]
AO090012000163	1695	10.2411	53.994	2.39843	1.90558e-09	Up	7.79916e-10	GO:0043231//intracellular membrane-bounded organelle	GO:0046914//transition metal ion binding;GO:0001071//nucleic acid binding transcription factor activity;GO:0003676//nucleic acid binding	GO:0006351//transcription, DNA-templated	NA	NA	gi|83770250|dbj|BAE60383.1|//unnamed protein product [Aspergillus oryzae RIB40]
AO090001000657	2058	1030.91	5434.82	2.39832	0	Up	0	NA	GO:0046872//metal ion binding;GO:0003824//catalytic activity;GO:0050662//coenzyme binding	GO:0008152//metabolic process	Energy production and conversion ;	K03885//NADH dehydrogenase [EC:1.6.99.3]	gi|169769372|ref|XP_001819156.1|//NADH-ubiquinone oxidoreductase subunit [Aspergillus oryzae RIB40]
AO090038000078	1296	1.51887	8.00323	2.39758	0.0172132	Up	0.0108226	NA	NA	GO:0006810//transport	Carbohydrate transport and metabolism ; Amino acid transport and metabolism ; Inorganic ion transport and metabolism ; General function prediction only ;	K17866//diphthamide biosynthesis protein 2;K00276//primary-amine oxidase [EC:1.4.3.21];K02835//peptide chain release factor 1;K11231//osomolarity two-component system, sensor histidine kinase SLN1 [EC:2.7.13.3]	gi|83773799|dbj|BAE63924.1|//unnamed protein product [Aspergillus oryzae RIB40]
AO090103000022	1629	92.0749	484.379	2.39526	4.85189e-68	Up	7.20437e-69	NA	GO:0050662//coenzyme binding;GO:0016491//oxidoreductase activity	GO:0044281//small molecule metabolic process	Amino acid transport and metabolism ;	K17066//alcohol oxidase [EC:1.1.3.13];K00108//choline dehydrogenase [EC:1.1.99.1]	gi|169784362|ref|XP_001826642.1|//GMC oxidoreductase [Aspergillus oryzae RIB40]
AO090020000456	537	67.5128	354.965	2.39444	4.52141e-46	Up	8.35355e-47	NA	NA	NA	NA	NA	gi|83773513|dbj|BAE63640.1|//unnamed protein product [Aspergillus oryzae RIB40]
AO090701000638	1155	85.2566	448.051	2.39378	3.46679e-67	Up	5.19237e-68	NA	GO:0004518//nuclease activity	NA	Carbohydrate transport and metabolism ;	K00457//4-hydroxyphenylpyruvate dioxygenase [EC:1.13.11.27]	gi|169777979|ref|XP_001823455.1|//AP endonuclease, family 2 [Aspergillus oryzae RIB40]
AO090023000576	1805	1051.78	5524.77	2.39308	0	Up	0	GO:0000324//fungal-type vacuole	GO:0046872//metal ion binding;GO:0046914//transition metal ion binding	NA	NA	K12182//hepatocyte growth factor-regulated tyrosine kinase substrate;K00921//1-phosphatidylinositol-3-phosphate 5-kinase [EC:2.7.1.150]	gi|317145843|ref|XP_001821110.2|//FYVE domain protein [Aspergillus oryzae RIB40];gi|83768971|dbj|BAE59108.1|//unnamed protein product [Aspergillus oryzae RIB40]
BGI_novel_G000055	1479	286.928	1501.61	2.38775	1.67828e-206	Up	1.20352e-207	GO:0005759//mitochondrial matrix	NA	GO:0006121//mitochondrial electron transport, succinate to ubiquinone;GO:0018293//protein-FAD linkage	NA	K18168//succinate dehydrogenase assembly factor 2;K20352//p24 family protein delta-1	gi|238504186|ref|XP_002383325.1|//TPR repeat protein [Aspergillus flavus NRRL3357]
AO090124000047	1752	557.87	2916.91	2.38644	0	Up	0	NA	GO:0003824//catalytic activity;GO:0005488//binding	NA	Carbohydrate transport and metabolism ; Coenzyme transport and metabolism ; General function prediction only ;	K01568//pyruvate decarboxylase [EC:4.1.1.1]	gi|169778530|ref|XP_001823730.1|//pyruvate decarboxylase [Aspergillus oryzae RIB40]
AO090003000475	1728	105.396	550.011	2.38364	1.13735e-82	Up	1.49825e-83	NA	GO:0016879//ligase activity, forming carbon-nitrogen bonds;GO:0016810//hydrolase activity, acting on carbon-nitrogen (but not peptide) bonds	NA	Translation, ribosomal structure and biogenesis ;	K01426//amidase [EC:3.5.1.4]	gi|83767513|dbj|BAE57652.1|//unnamed protein product [Aspergillus oryzae RIB40]
AO090023000697	1509	533.086	2778.73	2.38199	3.61786e-295	Up	1.94165e-296	NA	GO:0003824//catalytic activity	GO:0008152//metabolic process	Energy production and conversion ;	K00129//aldehyde dehydrogenase (NAD(P)+) [EC:1.2.1.5]	gi|238491478|ref|XP_002376976.1|//aldehyde dehydrogenase, putative [Aspergillus flavus NRRL3357]
AO090102000065	1828	1358.55	7077.72	2.38122	0	Up	0	NA	GO:0016620//oxidoreductase activity, acting on the aldehyde or oxo group of donors, NAD or NADP as acceptor;GO:0003824//catalytic activity	GO:0008152//metabolic process;GO:0055114//oxidation-reduction process	Energy production and conversion ;	K00129//aldehyde dehydrogenase (NAD(P)+) [EC:1.2.1.5];K00128//aldehyde dehydrogenase (NAD+) [EC:1.2.1.3]	gi|83771044|dbj|BAE61176.1|//unnamed protein product [Aspergillus oryzae RIB40];gi|317147821|ref|XP_001822309.2|//aldehyde dehydrogenase (AldH12) [Aspergillus oryzae RIB40]
AO090701000015	375	147.413	766.911	2.37919	2.33244e-103	Up	2.63884e-104	NA	NA	NA	NA	NA	gi|169776891|ref|XP_001822911.1|//protein precursor [Aspergillus oryzae RIB40]
AO090005000804	2562	359.648	1868.53	2.37725	1.91117e-245	Up	1.18403e-246	GO:0043231//intracellular membrane-bounded organelle	GO:0032559//adenyl ribonucleotide binding;GO:0017111//nucleoside-triphosphatase activity;GO:0003676//nucleic acid binding	GO:0033554//cellular response to stress;GO:0006259//DNA metabolic process	Replication, recombination and repair ;	K14635//ATP-dependent DNA helicase MPH1 [EC:3.6.4.12]	gi|317139883|ref|XP_001817822.2|//ATP-dependent DNA helicase mph1 [Aspergillus oryzae RIB40]
AO090012000388	513	1.3462	6.98768	2.37592	0.0343739	Up	0.0224191	NA	NA	NA	NA	K00860//adenylylsulfate kinase [EC:2.7.1.25];K11843//ubiquitin carboxyl-terminal hydrolase 14 [EC:3.4.19.12]	gi|169763024|ref|XP_001727412.1|//thioesterase family protein [Aspergillus oryzae RIB40]
AO090012000708	465	914.849	4734.09	2.37148	0	Up	0	NA	NA	NA	NA	NA	gi|169763556|ref|XP_001727678.1|//hypothetical protein AOR_1_1234194 [Aspergillus oryzae RIB40]
AO090010000492	459	145.255	750.359	2.36899	3.20407e-109	Up	3.49224e-110	NA	NA	NA	NA	NA	gi|83776224|dbj|BAE66343.1|//unnamed protein product [Aspergillus oryzae RIB40]
AO090038000495	2103	1.5398	7.94862	2.36796	0.0236023	Up	0.0151113	NA	GO:0003824//catalytic activity	GO:0006720//isoprenoid metabolic process	Coenzyme transport and metabolism ;	K18685//ophiobolin F synthase [EC:4.2.3.145];K00804//geranylgeranyl diphosphate synthase, type III [EC:2.5.1.1 2.5.1.10 2.5.1.29]	gi|83774154|dbj|BAE64279.1|//unnamed protein product [Aspergillus oryzae RIB40]
AO090701000509	3155	575.165	2966.95	2.36694	0	Up	0	NA	NA	NA	NA	NA	gi|169777757|ref|XP_001823344.1|//hypothetical protein AOR_1_926114 [Aspergillus oryzae RIB40]
AO090023000637	1314	339.573	1751.48	2.36678	3.06593e-252	Up	1.84582e-253	NA	NA	NA	NA	K01199//glucan endo-1,3-beta-D-glucosidase [EC:3.2.1.39]	gi|169773383|ref|XP_001821160.1|//GPI anchored cell wall protein [Aspergillus oryzae RIB40]
AO090003001055	3745	2857.25	14721.4	2.36522	0	Up	0	NA	GO:0019842//vitamin binding;GO:0004591//oxoglutarate dehydrogenase (succinyl-transferring) activity;GO:0016624//oxidoreductase activity, acting on the aldehyde or oxo group of donors, disulfide as acceptor;GO:0030976//thiamine pyrophosphate binding	GO:0006099//tricarboxylic acid cycle;GO:0006007//glucose catabolic process	Energy production and conversion ;	K00164//2-oxoglutarate dehydrogenase E1 component [EC:1.2.4.2]	gi|83768018|dbj|BAE58157.1|//unnamed protein product [Aspergillus oryzae RIB40];gi|259484969|tpe|CBF81643.1|//TPA: oxoglutarate dehydrogenase (succinyl-transferring) (Eurofung) [Aspergillus nidulans FGSC A4]
AO090010000418	828	2.35855	12.1411	2.36392	0.00403403	Up	0.00236962	NA	NA	NA	NA	NA	gi|169785909|ref|XP_001827415.1|//hypothetical protein AOR_1_686024 [Aspergillus oryzae RIB40]
AO090005000562	723	3.27562	16.8406	2.36211	0.00226765	Up	0.0013026	NA	GO:0016407//acetyltransferase activity	NA	NA	K02865//large subunit ribosomal protein L10Ae	gi|169766280|ref|XP_001817611.1|//acetyltransferase, GNAT family [Aspergillus oryzae RIB40]
AO090012000150	1928	200.336	1029.74	2.36178	1.97509e-139	Up	1.81636e-140	NA	GO:0016627//oxidoreductase activity, acting on the CH-CH group of donors;GO:0046872//metal ion binding;GO:0020037//heme binding;GO:0005506//iron ion binding;GO:0050660//flavin adenine dinucleotide binding;GO:0003995//acyl-CoA dehydrogenase activity;GO:0050662//coenzyme binding	GO:0008152//metabolic process;GO:0055114//oxidation-reduction process	Lipid transport and metabolism ;	K15389//acyl-CoA dehydrogenase	gi|83770237|dbj|BAE60370.1|//unnamed protein product [Aspergillus oryzae RIB40];gi|849269574|dbj|GAO88195.1|//isovaleryl-CoA dehydrogenase, mitochondrial [Neosartorya udagawae]
AO090023000387	1914	110.838	569.081	2.36018	1.10328e-85	Up	1.40158e-86	NA	NA	NA	NA	K01869//leucyl-tRNA synthetase [EC:6.1.1.4];K02320//DNA polymerase alpha subunit A [EC:2.7.7.7]	gi|83768802|dbj|BAE58939.1|//unnamed protein product [Aspergillus oryzae RIB40]
AO090120000049	1449	27.8571	142.727	2.35714	1.16294e-21	Up	3.25127e-22	NA	GO:0004674//protein serine/threonine kinase activity;GO:0005524//ATP binding;GO:0032559//adenyl ribonucleotide binding;GO:0004672//protein kinase activity	GO:0006464//cellular protein modification process;GO:0006468//protein phosphorylation;GO:0006796//phosphate-containing compound metabolic process	NA	K14834//nucleolar complex protein 3;K08832//serine/threonine-protein kinase SRPK3 [EC:2.7.11.1];K08282//non-specific serine/threonine protein kinase [EC:2.7.11.1]	gi|914761757|gb|KOC15572.1|//hypothetical protein AFLA70_143g002691 [Aspergillus flavus AF70];gi|83772557|dbj|BAE62685.1|//unnamed protein product [Aspergillus oryzae RIB40]
AO090012001026	2343	2664.9	13653.5	2.35711	0	Up	0	GO:0044464//cell part;GO:0016021//integral component of membrane	GO:0008237//metallopeptidase activity	GO:0006508//proteolysis	Cell cycle control, cell division, chromosome partitioning ; Transcription ; Signal transduction mechanisms ;	K07762//pappalysin-1 [EC:3.4.24.79];K01262//Xaa-Pro aminopeptidase [EC:3.4.11.9];K11314//transcriptional adapter 2-alpha	gi|238490103|ref|XP_002376289.1|//LEM3/CDC50 family protein [Aspergillus flavus NRRL3357];gi|914761496|gb|KOC15311.1|//LEM3/CDC50 family protein [Aspergillus flavus AF70]
AO090113000038	1593	31.8896	163.197	2.35546	1.28919e-23	Up	3.46301e-24	GO:0031224//intrinsic component of membrane	GO:0008493//tetracycline transporter activity	GO:0015850//organic hydroxy compound transport;GO:0042221//response to chemical	Carbohydrate transport and metabolism ; Amino acid transport and metabolism ; Inorganic ion transport and metabolism ; General function prediction only ;	K01952//phosphoribosylformylglycinamidine synthase [EC:6.3.5.3];K16066//3-hydroxy acid dehydrogenase / malonic semialdehyde reductase [EC:1.1.1.381 1.1.1.-];K13095//splicing factor 1;K10866//DNA repair protein RAD50 [EC:3.6.-.-];K14708//solute carrier family 26 (sodium-independent sulfate anion transporter), member 11	gi|169779537|ref|XP_001824233.1|//MFS toxin efflux pump [Aspergillus oryzae RIB40]
AO090701000670	474	6.81594	34.7933	2.35183	6.0396e-06	Up	2.89498e-06	NA	NA	NA	NA	NA	gi|83772215|dbj|BAE62345.1|//unnamed protein product [Aspergillus oryzae RIB40]
AO090012000162	687	2.37656	12.1266	2.35123	0.00461066	Up	0.00272361	NA	NA	NA	NA	K20368//protein cornichon;K12618//5'-3' exoribonuclease 1 [EC:3.1.13.-]	gi|83770249|dbj|BAE60382.1|//unnamed protein product [Aspergillus oryzae RIB40]
AO090001000447	2045	3.43506	17.375	2.3386	0.000701664	Up	0.000386519	NA	GO:0016614//oxidoreductase activity, acting on CH-OH group of donors;GO:0050660//flavin adenine dinucleotide binding;GO:0050662//coenzyme binding;GO:0016899//oxidoreductase activity, acting on the CH-OH group of donors, oxygen as acceptor	GO:0055114//oxidation-reduction process;GO:0044281//small molecule metabolic process	Amino acid transport and metabolism ;	K17066//alcohol oxidase [EC:1.1.3.13]	gi|391863878|gb|EIT73177.1|//choline dehydrogenase [Aspergillus oryzae 3.042];gi|83766825|dbj|BAE56965.1|//unnamed protein product [Aspergillus oryzae RIB40]
AO090005001192	939	1984.65	10036.4	2.33828	0	Up	0	GO:0031224//intrinsic component of membrane;GO:0019866//organelle inner membrane	NA	GO:0006810//transport	NA	K15102//solute carrier family 25 (mitochondrial phosphate transporter), member 3	gi|169767354|ref|XP_001818148.1|//phosphate carrier protein 2 [Aspergillus oryzae RIB40]
AO090010000477	477	368.661	1863.98	2.33802	3.12562e-262	Up	1.79544e-263	NA	NA	NA	Function unknown ;	NA	gi|169786003|ref|XP_001827462.1|//stress response RCI peptide [Aspergillus oryzae RIB40]
AO090020000388	1296	78.8146	397.72	2.33522	4.20952e-58	Up	6.83955e-59	NA	NA	NA	NA	K03781//catalase [EC:1.11.1.6]	gi|83773455|dbj|BAE63582.1|//unnamed protein product [Aspergillus oryzae RIB40]
AO090010000688	1993	52.2528	263.414	2.33375	2.71294e-39	Up	5.53427e-40	GO:0043231//intracellular membrane-bounded organelle;GO:0005634//nucleus;GO:0016021//integral component of membrane	GO:0003677//DNA binding;GO:0046914//transition metal ion binding;GO:0008270//zinc ion binding;GO:0003676//nucleic acid binding	GO:0006351//transcription, DNA-templated	NA	NA	gi|317159232|ref|XP_001827640.2|//fungal specific transcription factor [Aspergillus oryzae RIB40];gi|83776388|dbj|BAE66507.1|//unnamed protein product [Aspergillus oryzae RIB40]
AO090012000546	1843	18.091	91.038	2.3312	2.62155e-14	Up	8.94604e-15	GO:0016021//integral component of membrane	NA	GO:0006810//transport;GO:0055085//transmembrane transport	Carbohydrate transport and metabolism ; Amino acid transport and metabolism ; Inorganic ion transport and metabolism ; General function prediction only ;	K01939//adenylosuccinate synthase [EC:6.3.4.4];K03448//MFS transporter, ACS family, pantothenate transporter;K11369//retrograde regulation protein 2	gi|992227616|ref|XP_015410534.1|//hypothetical protein ANOM_002393 [Aspergillus nomius NRRL 13137];gi|391869686|gb|EIT78881.1|//permease of the major facilitator superfamily [Aspergillus oryzae 3.042]
AO090003001244	1973	1753.46	8806.52	2.32837	0	Up	0	NA	GO:0008081//phosphoric diester hydrolase activity;GO:0042578//phosphoric ester hydrolase activity	GO:0044238//primary metabolic process;GO:0006629//lipid metabolic process	NA	NA	gi|83768176|dbj|BAE58315.1|//unnamed protein product [Aspergillus oryzae RIB40]
AO090010000501	1512	56.8256	285.396	2.32836	2.20696e-39	Up	4.49397e-40	NA	NA	NA	Translation, ribosomal structure and biogenesis ;	NA	gi|83776231|dbj|BAE66350.1|//unnamed protein product [Aspergillus oryzae RIB40]
AO090701000469	3709	28.0767	140.808	2.32628	1.21481e-18	Up	3.67473e-19	GO:0016021//integral component of membrane	GO:0016705//oxidoreductase activity, acting on paired donors, with incorporation or reduction of molecular oxygen;GO:0020037//heme binding;GO:0005506//iron ion binding;GO:0004497//monooxygenase activity;GO:0016491//oxidoreductase activity	GO:0008152//metabolic process;GO:0055114//oxidation-reduction process	Secondary metabolites biosynthesis, transport and catabolism ;	K17475//tryprostatin B 6-hydroxylase [EC:1.14.13.176];K07824//benzoate 4-monooxygenase [EC:1.14.13.12]	gi|83772049|dbj|BAE62179.1|//unnamed protein product [Aspergillus oryzae RIB40]
AO090020000015	1437	4512.71	22626.3	2.32594	0	Up	0	NA	GO:0008238//exopeptidase activity	NA	Amino acid transport and metabolism ;	K15428//Cys-Gly metallodipeptidase DUG1 [EC:3.4.13.-]	gi|914763581|gb|KOC17390.1|//putative glutamate carboxypeptidase [Aspergillus flavus AF70]
AO090038000176	1959	10.4636	52.4397	2.32528	7.4061e-09	Up	3.09457e-09	NA	NA	GO:0006464//cellular protein modification process	NA	NA	gi|83773881|dbj|BAE64006.1|//unnamed protein product [Aspergillus oryzae RIB40]
AO090012000588	16168	2094.18	10485.7	2.32396	0	Up	0	GO:0005737//cytoplasm	GO:0003677//DNA binding;GO:0005524//ATP binding;GO:0032559//adenyl ribonucleotide binding;GO:0017111//nucleoside-triphosphatase activity;GO:0008270//zinc ion binding;GO:0004386//helicase activity;GO:0043024//ribosomal small subunit binding;GO:0003676//nucleic acid binding	GO:0030466//chromatin silencing at silent mating-type cassette;GO:0070478//nuclear-transcribed mRNA catabolic process, 3'-5' exonucleolytic nonsense-mediated decay;GO:0008298//intracellular mRNA localization;GO:0016567//protein ubiquitination;GO:0006310//DNA recombination	Transcription ; Replication, recombination and repair ;	K19001//ATP-dependent DNA helicase;K14326//regulator of nonsense transcripts 1 [EC:3.6.4.-]	gi|115491919|ref|XP_001210587.1|//ATP-dependent helicase NAM7 [Aspergillus terreus NIH2624];gi|169763362|ref|XP_001727581.1|//SNF2 family helicase/ATPase PasG [Aspergillus oryzae RIB40]
AO090012000290	795	1.29782	6.49789	2.32388	0.0281155	Up	0.0181872	NA	NA	NA	NA	NA	gi|169762862|ref|XP_001727331.1|//hypothetical protein AOR_1_502194 [Aspergillus oryzae RIB40]
AO090003000476	1533	2176.85	10892.3	2.323	0	Up	0	GO:0031983//vesicle lumen;GO:0044464//cell part	GO:0046872//metal ion binding;GO:0015924//mannosyl-oligosaccharide mannosidase activity	GO:0044238//primary metabolic process	NA	K01230//mannosyl-oligosaccharide alpha-1,2-mannosidase [EC:3.2.1.113]	gi|169770371|ref|XP_001819655.1|//mannosyl-oligosaccharide alpha-1,2-mannosidase 1B [Aspergillus oryzae RIB40]
AO090026000557	438	9.32634	46.5304	2.31879	0.0485104	Up	0.0323046	NA	NA	NA	NA	K13621//betaine lipid synthase	gi|83769852|dbj|BAE59987.1|//unnamed protein product [Aspergillus oryzae RIB40]
AO090701000885	987	13.1945	65.7802	2.31771	8.70671e-11	Up	3.37512e-11	NA	GO:0004553//hydrolase activity, hydrolyzing O-glycosyl compounds	GO:0019566//arabinose metabolic process;GO:0000272//polysaccharide catabolic process	NA	NA	gi|169778401|ref|XP_001823666.1|//alpha-L-arabinofuranosidase axhA [Aspergillus oryzae RIB40]
AO090003001318	4096	602.996	2997.96	2.31376	0	Up	0	GO:0016021//integral component of membrane	NA	NA	NA	K00859//dephospho-CoA kinase [EC:2.7.1.24]	gi|83768240|dbj|BAE58379.1|//unnamed protein product [Aspergillus oryzae RIB40];gi|317144798|ref|XP_001820381.2|//hypothetical protein AOR_1_2318154 [Aspergillus oryzae RIB40]
AO090103000273	858	8.98842	44.6288	2.31184	1.83009e-07	Up	8.11856e-08	NA	NA	NA	NA	NA	gi|169784786|ref|XP_001826854.1|//hypothetical protein AOR_1_452034 [Aspergillus oryzae RIB40]
AO090138000059	543	198.457	984.673	2.31082	1.83502e-130	Up	1.77708e-131	NA	NA	NA	NA	NA	gi|169782223|ref|XP_001825574.1|//hypothetical protein AOR_1_98064 [Aspergillus oryzae RIB40]
AO090005000738	432	25.092	124.027	2.30536	7.31775e-18	Up	2.26545e-18	GO:0030529//intracellular ribonucleoprotein complex	NA	GO:0000087//mitotic M phase	Posttranslational modification, protein turnover, chaperones ; Energy production and conversion ;	K12859//U5 snRNP protein, DIM1 family	gi|169766598|ref|XP_001817770.1|//mitosis protein dim1 [Aspergillus oryzae RIB40]
BGI_novel_G000071	2539	54.1468	267.151	2.30271	3.58615e-30	Up	8.49742e-31	NA	GO:0003677//DNA binding	NA	NA	K11294//nucleolin	gi|317156967|ref|XP_003190786.1|//MYB DNA-binding domain protein [Aspergillus oryzae RIB40]
AO090003001192	480	32.1301	157.881	2.29684	8.85432e-24	Up	2.3662e-24	NA	NA	NA	NA	NA	gi|238485804|ref|XP_002374140.1|//conserved hypothetical protein [Aspergillus flavus NRRL3357]
AO090009000215	8251	857.936	4215.36	2.29671	0	Up	0	GO:0044424//intracellular part;GO:0016021//integral component of membrane;GO:0005737//cytoplasm	GO:0046872//metal ion binding;GO:0004555//alpha,alpha-trehalase activity;GO:0005509//calcium ion binding;GO:0015927//trehalase activity;GO:0015079//potassium ion transmembrane transporter activity	GO:0043936//asexual sporulation resulting in formation of a cellular spore;GO:0009267//cellular response to starvation;GO:0005993//trehalose catabolic process;GO:0071805//potassium ion transmembrane transport;GO:0005991//trehalose metabolic process;GO:0034605//cellular response to heat	Carbohydrate transport and metabolism ;	K01194//alpha,alpha-trehalase [EC:3.2.1.28]	gi|115389812|ref|XP_001212411.1|//neutral trehalase [Aspergillus terreus NIH2624];gi|169764473|ref|XP_001816708.1|//neutral trehalase [Aspergillus oryzae RIB40]
AO090103000169	1356	2.78666	13.6878	2.29628	0.00306823	Up	0.00178309	NA	NA	NA	Translation, ribosomal structure and biogenesis ;	NA	gi|169784608|ref|XP_001826765.1|//siderophore biosynthesis acetylase AceI [Aspergillus oryzae RIB40]
AO090010000019	651	57.3541	281.711	2.29625	2.00732e-39	Up	4.08374e-40	NA	NA	NA	Chromatin structure and dynamics ;	K11644//paired amphipathic helix protein Sin3a	gi|83775819|dbj|BAE65938.1|//unnamed protein product [Aspergillus oryzae RIB40]
AO090009000343	2088	1.73352	8.5116	2.29573	0.0196372	Up	0.0124407	NA	GO:0032561//guanyl ribonucleotide binding;GO:0017111//nucleoside-triphosphatase activity	GO:0009207//purine ribonucleoside triphosphate catabolic process	General function prediction only ;	NA	gi|83764673|dbj|BAE54817.1|//unnamed protein product [Aspergillus oryzae RIB40]
AO090001000128	864	4.26231	20.9268	2.29564	0.000196262	Up	0.000103651	NA	GO:0004519//endonuclease activity;GO:0003676//nucleic acid binding	NA	NA	K01167//ribonuclease T1 [EC:3.1.27.3]	gi|83766539|dbj|BAE56679.1|//unnamed protein product [Aspergillus oryzae RIB40]
AO090011000210	405	1.95719	9.608	2.29545	0.0123881	Up	0.00766572	NA	NA	NA	NA	NA	gi|83774626|dbj|BAE64749.1|//unnamed protein product [Aspergillus oryzae RIB40]
AO090001000165	441	2.59476	12.7069	2.29194	0.00674724	Up	0.00404661	NA	NA	NA	NA	NA	gi|83766574|dbj|BAE56714.1|//unnamed protein product [Aspergillus oryzae RIB40]
AO090020000497	1131	386.815	1893.22	2.29113	1.42938e-258	Up	8.40814e-260	NA	GO:0003824//catalytic activity	GO:0008152//metabolic process	Lipid transport and metabolism ; Secondary metabolites biosynthesis, transport and catabolism ; General function prediction only ;	K17742//sorbose reductase [EC:1.1.1.289];K17738//D-arabinitol 2-dehydrogenase [EC:1.1.1.250]	gi|169780676|ref|XP_001824802.1|//D-arabinitol dehydrogenase ArbD [Aspergillus oryzae RIB40]
AO090023000857	1182	1467.55	7176.15	2.2898	0	Up	0	NA	NA	NA	NA	NA	gi|169773781|ref|XP_001821359.1|//hypothetical protein AOR_1_1504144 [Aspergillus oryzae RIB40]
AO090103000456	1979	529.779	2590.4	2.28971	0	Up	0	GO:0016021//integral component of membrane;GO:0005789//endoplasmic reticulum membrane;GO:0031227//intrinsic component of endoplasmic reticulum membrane	GO:0016709//oxidoreductase activity, acting on paired donors, with incorporation or reduction of molecular oxygen, NAD(P)H as one donor, and incorporation of one atom of oxygen;GO:0050661//NADP binding;GO:0000166//nucleotide binding;GO:0004499//N,N-dimethylaniline monooxygenase activity;GO:0050660//flavin adenine dinucleotide binding;GO:0050662//coenzyme binding	GO:0008152//metabolic process;GO:0055114//oxidation-reduction process	Inorganic ion transport and metabolism ;	K00485//dimethylaniline monooxygenase (N-oxide forming) [EC:1.14.13.8]	gi|169785112|ref|XP_001827017.1|//flavin-binding monooxygenase-like protein [Aspergillus oryzae RIB40]
AO090026000393	453	150.248	732.542	2.28556	1.40715e-96	Up	1.6749e-97	NA	NA	NA	NA	NA	gi|169774775|ref|XP_001821855.1|//hypothetical protein AOR_1_732014 [Aspergillus oryzae RIB40]
AO090020000516	681	323.994	1576.11	2.28232	3.7766e-219	Up	2.59005e-220	NA	GO:0016879//ligase activity, forming carbon-nitrogen bonds;GO:0032559//adenyl ribonucleotide binding	GO:0006464//cellular protein modification process	Posttranslational modification, protein turnover, chaperones ;	K02207//ubiquitin-conjugating enzyme E2 R [EC:2.3.2.23]	gi|770311182|gb|KJK68023.1|//Ubiquitin-conjugating enzyme [Aspergillus parasiticus SU-1]
AO090020000596	1428	1083.51	5270.72	2.28229	0	Up	0	GO:0045281//succinate dehydrogenase complex;GO:0044459//plasma membrane part;GO:0016021//integral component of membrane;GO:0005739//mitochondrion	GO:0009055//electron carrier activity;GO:0000104//succinate dehydrogenase activity	GO:0006099//tricarboxylic acid cycle;GO:0009060//aerobic respiration	Energy production and conversion ;	K00236//succinate dehydrogenase (ubiquinone) cytochrome b560 subunit	gi|992077350|ref|XP_015402216.1|//cytochrome B-560 subunit of succinate dehydrogenase, partial [Aspergillus nomius NRRL 13137];gi|169780850|ref|XP_001824889.1|//cytochrome B-560 subunit of succinate dehydrogenase [Aspergillus oryzae RIB40]
AO090701000101	1467	444.52	2162.35	2.28228	4.48271e-301	Up	2.38104e-302	GO:0044424//intracellular part	GO:0046914//transition metal ion binding;GO:0016151//nickel cation binding	GO:0006807//nitrogen compound metabolic process;GO:0008152//metabolic process	Posttranslational modification, protein turnover, chaperones ;	K03188//urease accessory protein	gi|83771724|dbj|BAE61854.1|//unnamed protein product [Aspergillus oryzae RIB40];gi|317148887|ref|XP_001822987.2|//urease accessory protein UreF [Aspergillus oryzae RIB40]
AO090005000568	504	43.9988	213.103	2.27601	1.31107e-31	Up	3.03419e-32	GO:0044464//cell part	GO:0046914//transition metal ion binding	NA	NA	K18932//palmitoyltransferase [EC:2.3.1.225]	gi|83765469|dbj|BAE55612.1|//unnamed protein product [Aspergillus oryzae RIB40]
AO090003001091	11663	1762.92	8524.91	2.27372	0	Up	0	GO:0043234//protein complex	NA	NA	NA	K06699//proteasome activator subunit 4	gi|83768048|dbj|BAE58187.1|//unnamed protein product [Aspergillus oryzae RIB40];gi|966767816|dbj|GAQ37949.1|//proteasome activator subunit 4 [Aspergillus niger]
AO090038000032	1623	77.5397	374.804	2.27313	3.91782e-54	Up	6.62528e-55	GO:0043231//intracellular membrane-bounded organelle	GO:0046914//transition metal ion binding;GO:0001071//nucleic acid binding transcription factor activity;GO:0003676//nucleic acid binding	GO:0006351//transcription, DNA-templated	NA	K10798//poly [ADP-ribose] polymerase [EC:2.4.2.30];K08157//MFS transporter, DHA1 family, multidrug resistance protein	gi|238500920|ref|XP_002381694.1|//protein RDR1, putative [Aspergillus flavus NRRL3357]
AO090102000167	336	19.777	95.1346	2.26614	1.64642e-14	Up	5.5896e-15	NA	NA	NA	NA	NA	gi|83771134|dbj|BAE61266.1|//unnamed protein product [Aspergillus oryzae RIB40]
AO090003001328	954	105.313	506.215	2.26506	1.90323e-71	Up	2.74368e-72	NA	GO:0003824//catalytic activity	GO:0008152//metabolic process	General function prediction only ;	K18097//glycerol 2-dehydrogenase (NADP+) [EC:1.1.1.156];K17743//D-xylose reductase [EC:1.1.1.307]	gi|169771843|ref|XP_001820391.1|//aldo-keto reductase (AKR) [Aspergillus oryzae RIB40]
AO090003000997	1191	41.1946	197.906	2.26429	1.50048e-17	Up	4.6839e-18	NA	NA	NA	NA	K11121//NAD-dependent histone deacetylase SIR2 [EC:3.5.1.-];K15430//tRNA (guanine10-N2)-methyltransferase [EC:2.1.1.214]	gi|169771277|ref|XP_001820108.1|//TPR domain protein [Aspergillus oryzae RIB40]
AO090005000481	1462	226.664	1088.08	2.26315	7.73721e-138	Up	7.18664e-139	NA	GO:0000166//nucleotide binding;GO:0003824//catalytic activity	NA	Energy production and conversion ;	K00354//NADPH2 dehydrogenase [EC:1.6.99.1];K05894//12-oxophytodienoic acid reductase [EC:1.3.1.42];K09580//protein disulfide-isomerase A1 [EC:5.3.4.1]	gi|169766140|ref|XP_001817541.1|//NADH-dependent flavin oxidoreductase [Aspergillus oryzae RIB40]
AO090005000264	405	4.90814	23.4392	2.25568	0.000225026	Up	0.000119463	NA	NA	NA	NA	NA	gi|238482361|ref|XP_002372419.1|//conserved hypothetical protein [Aspergillus flavus NRRL3357]
AO090011000863	2814	1045.78	4987.2	2.25366	0	Up	0	GO:0031224//intrinsic component of membrane;GO:0016021//integral component of membrane	GO:0004144//diacylglycerol O-acyltransferase activity	GO:0019432//triglyceride biosynthetic process	Lipid transport and metabolism ;	K11155//diacylglycerol O-acyltransferase 1 [EC:2.3.1.20 2.3.1.75 2.3.1.76]	gi|391869519|gb|EIT78716.1|//sterol O-acyltransferase/Diacylglycerol O-acyltransferase [Aspergillus oryzae 3.042]
AO090011000484	612	226.436	1079.27	2.25288	3.79692e-137	Up	3.54421e-138	NA	NA	NA	Function unknown ;	K01874//methionyl-tRNA synthetase [EC:6.1.1.10]	gi|169783304|ref|XP_001826114.1|//GrpB domain protein [Aspergillus oryzae RIB40]
AO090026000246	5885	208.556	991.753	2.24954	2.66312e-136	Up	2.50058e-137	NA	GO:0008238//exopeptidase activity	GO:0019538//protein metabolic process	General function prediction only ;	K06978//uncharacterized protein	gi|317146870|ref|XP_003189861.1|//hypothetical protein AOR_1_456014 [Aspergillus oryzae RIB40];gi|83769592|dbj|BAE59727.1|//unnamed protein product [Aspergillus oryzae RIB40]
AO090102000414	1803	7.88641	37.4635	2.24805	1.13892e-06	Up	5.26737e-07	NA	NA	NA	NA	K01843//lysine 2,3-aminomutase [EC:5.4.3.2]	gi|83771331|dbj|BAE61463.1|//unnamed protein product [Aspergillus oryzae RIB40]
AO090023000279	1188	47.7707	226.694	2.24655	5.51255e-31	Up	1.29098e-31	NA	NA	NA	NA	NA	gi|83768707|dbj|BAE58844.1|//unnamed protein product [Aspergillus oryzae RIB40]
AO090009000431	561	39.137	185.703	2.24639	5.22413e-25	Up	1.35617e-25	NA	NA	NA	NA	K12189//ESCRT-II complex subunit VPS25	gi|238503886|ref|XP_002383175.1|//ESCRT-II complex component (Vps25), putative [Aspergillus flavus NRRL3357]
AO090009000293	330	68.4179	323.052	2.23932	2.51479e-46	Up	4.63463e-47	NA	NA	NA	NA	NA	gi|169764605|ref|XP_001816774.1|//hypothetical protein AOR_1_476184 [Aspergillus oryzae RIB40]
AO090010000610	1466	240.27	1134.05	2.23876	4.01847e-153	Up	3.46248e-154	GO:0016021//integral component of membrane	NA	NA	NA	NA	gi|83776323|dbj|BAE66442.1|//unnamed protein product [Aspergillus oryzae RIB40];gi|317159142|ref|XP_001827575.2|//hypothetical protein AOR_1_1016024 [Aspergillus oryzae RIB40]
AO090701000329	1818	2.81366	13.2678	2.23741	0.00584059	Up	0.00348134	NA	NA	GO:0006810//transport	Carbohydrate transport and metabolism ; Amino acid transport and metabolism ; Inorganic ion transport and metabolism ; General function prediction only ;	K08197//MFS transporter, SIT family, siderophore-iron:H+ symporter	gi|83771926|dbj|BAE62056.1|//unnamed protein product [Aspergillus oryzae RIB40]
AO090113000066	2358	511.296	2406.31	2.23459	0	Up	0	NA	GO:0004674//protein serine/threonine kinase activity;GO:0005524//ATP binding;GO:0032559//adenyl ribonucleotide binding;GO:0004672//protein kinase activity	GO:0006464//cellular protein modification process;GO:0006468//protein phosphorylation	General function prediction only ; Signal transduction mechanisms ; Transcription ; Replication, recombination and repair ;	K02831//ser/thr/tyr protein kinase RAD53 [EC:2.7.11.-];K08803//death-associated protein kinase [EC:2.7.11.1];K08794//calcium/calmodulin-dependent protein kinase I [EC:2.7.11.17]	gi|83772999|dbj|BAE63127.1|//unnamed protein product [Aspergillus oryzae RIB40]
AO090012000646	3391	1330.28	6254.99	2.23328	0	Up	0	GO:0044464//cell part	GO:0046914//transition metal ion binding	NA	NA	NA	gi|83770655|dbj|BAE60788.1|//unnamed protein product [Aspergillus oryzae RIB40]
AO090102000584	1146	432.753	2032.01	2.23129	1.96141e-211	Up	1.38308e-212	NA	NA	NA	Energy production and conversion ;	K01796//alpha-methylacyl-CoA racemase [EC:5.1.99.4]	gi|169776537|ref|XP_001822735.1|//alpha-methylacyl-CoA racemase [Aspergillus oryzae RIB40]
AO090005000494	1341	44.3687	208.315	2.23115	9.99153e-29	Up	2.42453e-29	NA	GO:0016627//oxidoreductase activity, acting on the CH-CH group of donors;GO:0050662//coenzyme binding	GO:0008152//metabolic process	Lipid transport and metabolism ;	K00249//acyl-CoA dehydrogenase [EC:1.3.8.7]	gi|391873200|gb|EIT82262.1|//acyl-CoA dehydrogenase [Aspergillus oryzae 3.042]
AO090206000115	1677	239.078	1120.73	2.22888	2.82196e-145	Up	2.54062e-146	NA	GO:0032559//adenyl ribonucleotide binding	NA	General function prediction only ;	K18798//peroxisome-assembly ATPase [EC:3.6.4.7]	gi|169784291|ref|XP_001826607.1|//ATPase [Aspergillus oryzae RIB40]
AO090005000473	861	23.6124	110.662	2.22854	8.68454e-16	Up	2.85088e-16	NA	NA	NA	Posttranslational modification, protein turnover, chaperones ;	K13704//abhydrolase domain-containing protein 12 [EC:3.1.1.23]	gi|169766124|ref|XP_001817533.1|//hypothetical protein AOR_1_832174 [Aspergillus oryzae RIB40]
AO090026000250	2289	190.279	890.777	2.22695	6.59993e-102	Up	7.55805e-103	NA	GO:0016836//hydro-lyase activity;GO:0051536//iron-sulfur cluster binding	GO:0019543//propionate catabolic process	NA	NA	gi|914758667|gb|KOC12605.1|//phospholipase D Active site motif protein [Aspergillus flavus AF70];gi|391869818|gb|EIT79011.1|//hypothetical protein Ao3042_04638 [Aspergillus oryzae 3.042]
AO090011000012	4041	54.9598	257.169	2.22627	2.67075e-34	Up	5.91532e-35	NA	NA	NA	NA	K16261//yeast amino acid transporter	gi|83774453|dbj|BAE64576.1|//unnamed protein product [Aspergillus oryzae RIB40];gi|317156389|ref|XP_001825709.2|//NACHT and TPR domain protein [Aspergillus oryzae RIB40]
AO090102000493	1569	43.6497	204.212	2.22603	1.28147e-23	Up	3.43872e-24	GO:0031224//intrinsic component of membrane	GO:0005275//amine transmembrane transporter activity	GO:0006865//amino acid transport	Amino acid transport and metabolism ;	K19564//choline transport protein	gi|169776381|ref|XP_001822657.1|//choline transport protein [Aspergillus oryzae RIB40]
AO090012000851	2423	23.2056	108.535	2.22562	5.48554e-15	Up	1.84063e-15	GO:0043231//intracellular membrane-bounded organelle;GO:0031224//intrinsic component of membrane;GO:0016021//integral component of membrane	GO:0008135//translation factor activity, RNA binding;GO:0046914//transition metal ion binding;GO:0008270//zinc ion binding;GO:0017025//TBP-class protein binding;GO:0022857//transmembrane transporter activity;GO:0022891//substrate-specific transmembrane transporter activity	GO:0006810//transport;GO:0055085//transmembrane transport;GO:0006355//regulation of transcription, DNA-templated;GO:0006412//translation;GO:0006351//transcription, DNA-templated;GO:0006352//DNA-templated transcription, initiation	Carbohydrate transport and metabolism ; Amino acid transport and metabolism ; Inorganic ion transport and metabolism ; General function prediction only ;	K15196//transcription factor IIIB 90 kDa subunit;K08139//MFS transporter, SP family, sugar:H+ symporter;K00382//dihydrolipoamide dehydrogenase [EC:1.8.1.4]	gi|83770831|dbj|BAE60964.1|//unnamed protein product [Aspergillus oryzae RIB40]
AO090011000942	1834	2030.61	9493.37	2.22501	0	Up	0	NA	GO:0008238//exopeptidase activity;GO:0004177//aminopeptidase activity;GO:0008237//metallopeptidase activity;GO:0046914//transition metal ion binding;GO:0030145//manganese ion binding	GO:0006508//proteolysis	Amino acid transport and metabolism ;	K14213//Xaa-Pro dipeptidase [EC:3.4.13.9]	gi|83775245|dbj|BAE65368.1|//unnamed protein product [Aspergillus oryzae RIB40];gi|849270915|dbj|GAO86720.1|//probable Xaa-Pro aminopeptidase pepP [Neosartorya udagawae]
AO090020000645	456	1.93171	9.01811	2.22295	0.0159101	Up	0.00996378	NA	NA	NA	NA	NA	gi|83773669|dbj|BAE63796.1|//unnamed protein product [Aspergillus oryzae RIB40]
AO090003001498	1650	742.725	3466.45	2.22256	0	Up	0	NA	GO:0046872//metal ion binding;GO:0016160//amylase activity	GO:0005975//carbohydrate metabolic process	Carbohydrate transport and metabolism ;	K01176//alpha-amylase [EC:3.2.1.1]	gi|914756369|gb|KOC10534.1|//alpha-amylase, partial [Aspergillus flavus AF70]
AO090038000046	1137	5.35636	24.9509	2.21977	0.00028314	Up	0.000151618	GO:0043231//intracellular membrane-bounded organelle	GO:0046914//transition metal ion binding;GO:0001071//nucleic acid binding transcription factor activity	GO:0006351//transcription, DNA-templated	NA	K01469//5-oxoprolinase (ATP-hydrolysing) [EC:3.5.2.9]	gi|83773774|dbj|BAE63899.1|//unnamed protein product [Aspergillus oryzae RIB40]
AO090020000610	1455	15.7967	73.5499	2.2191	1.11295e-10	Up	4.33275e-11	NA	NA	NA	NA	NA	gi|169780872|ref|XP_001824900.1|//hypothetical protein AOR_1_1058084 [Aspergillus oryzae RIB40]
AO090003000415	3103	7585.52	35244.1	2.21606	0	Up	0	GO:0005739//mitochondrion	GO:0003994//aconitate hydratase activity;GO:0046872//metal ion binding;GO:0016836//hydro-lyase activity;GO:0051539//4 iron, 4 sulfur cluster binding;GO:0051536//iron-sulfur cluster binding	GO:0006099//tricarboxylic acid cycle;GO:0009060//aerobic respiration	Energy production and conversion ;	K01681//aconitate hydratase [EC:4.2.1.3]	gi|540850027|gb|AGV15466.1|//aconitase [Aspergillus terreus];gi|83767456|dbj|BAE57595.1|//unnamed protein product [Aspergillus oryzae RIB40]
AO090023000397	2925	1.50802	7.00018	2.21474	0.0341848	Up	0.0222926	NA	GO:0032559//adenyl ribonucleotide binding;GO:0004672//protein kinase activity	GO:0006464//cellular protein modification process	General function prediction only ;	K20032//palmitoyltransferase ZDHHC13/17 [EC:2.3.1.225];K06694//26S proteasome non-ATPase regulatory subunit 10	gi|83768811|dbj|BAE58948.1|//unnamed protein product [Aspergillus oryzae RIB40]
AO090701000565	1035	409.161	1898.14	2.21385	2.35599e-252	Up	1.41624e-253	NA	GO:0046914//transition metal ion binding	NA	NA	NA	gi|169777859|ref|XP_001823395.1|//hypothetical protein AOR_1_1034114 [Aspergillus oryzae RIB40]
AO090003001003	681	16.3667	75.9177	2.21367	2.58279e-10	Up	1.02023e-10	NA	GO:0032559//adenyl ribonucleotide binding;GO:0016301//kinase activity	GO:0044238//primary metabolic process;GO:0006796//phosphate-containing compound metabolic process	Carbohydrate transport and metabolism ;	K00851//gluconokinase [EC:2.7.1.12]	gi|169771287|ref|XP_001820113.1|//thermoresistant gluconokinase family protein [Aspergillus oryzae RIB40]
AO090011000172	2178	6.17905	28.6362	2.21238	5.54434e-05	Up	2.8301e-05	NA	NA	NA	General function prediction only ;	K10380//ankyrin;K15503//serine/threonine-protein phosphatase 6 regulatory ankyrin repeat subunit B	gi|169782776|ref|XP_001825850.1|//ankyrin repeat-containing protein [Aspergillus oryzae RIB40]
AO090103000310	1116	1.29407	5.98833	2.21024	0.0438854	Up	0.0290347	NA	NA	NA	Carbohydrate transport and metabolism ; Amino acid transport and metabolism ; Inorganic ion transport and metabolism ; General function prediction only ;	K01952//phosphoribosylformylglycinamidine synthase [EC:6.3.5.3];K13095//splicing factor 1;K10866//DNA repair protein RAD50 [EC:3.6.-.-];K14708//solute carrier family 26 (sodium-independent sulfate anion transporter), member 11	gi|83775634|dbj|BAE65754.1|//unnamed protein product [Aspergillus oryzae RIB40]
[truncated: 3,261 more rows]

## Sheet: Table S2
Table S2 COG classification of DEGs
Functional Categories	Gene Number	Gene ID
[truncated: 24 more rows]
[truncated: 750 more columns]

## Sheet: Table S3
Table S3 GO classification and enrichment analysis of DEGs
[truncated: 1,206 more rows]

## Sheet: Table S4
Table S4 KEGG pathway annotation of DEGs
[truncated: 125 more rows]

[truncated: 6 more sheets: Table S5, Table S6, Table S7, Table S8, Table S9, Table S10]
